# Supplementary material for: Proteomic analysis reveals the negative modulator of sperm function glycodelin as over-represented in semen exosomes isolated from asthenozoospermic patients
Source: Oxford University Press journal article supplement (doi:10.1093/humrep/dez114), 2019-06-13
Supplement: s1_dez114.pdf [file s1_dez114.pdf]

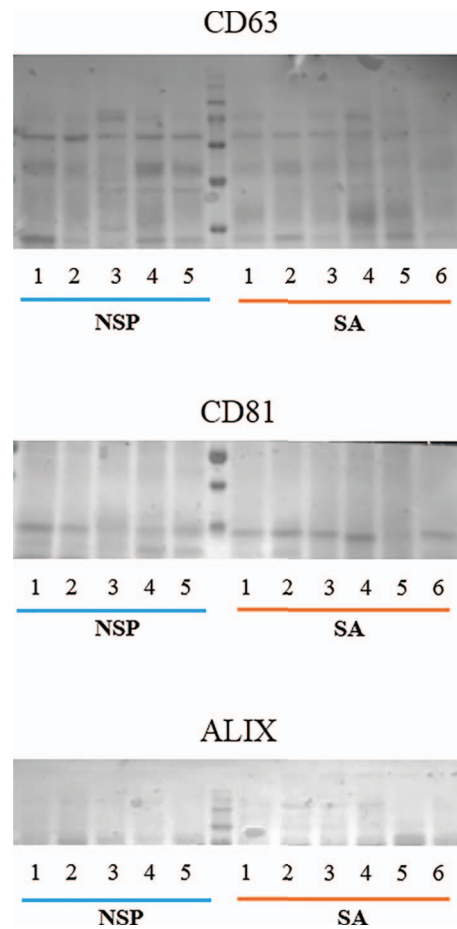

**Supplementary Figure S1** Amido black staining of total proteins in membranes previously probed with anti-CD63, CD81 (10  $\mu$ g) and ALIX (20  $\mu$ g).
