# Supplementary material for: Proteomic analysis reveals the negative modulator of sperm function glycodelin as over-represented in semen exosomes isolated from asthenozoospermic patients
Source: Oxford University Press journal article supplement (doi:10.1093/humrep/dez114), 2019-06-13
Supplement: s2_dez114.pdf [file s2_dez114.pdf]

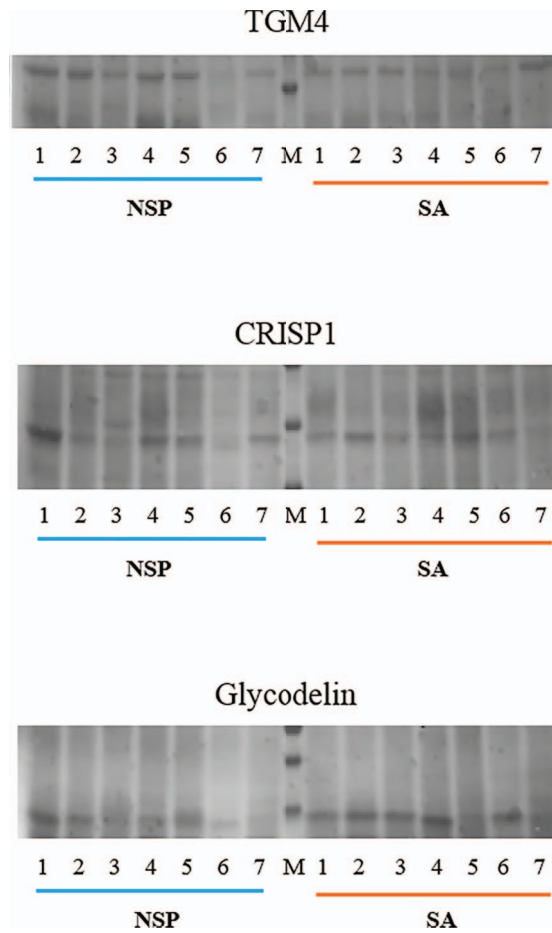

**Supplementary Figure S2** Amido Black staining of total proteins in membranes previously probed with anti-TGM4, CRISP1 and Glycodelin (30 $\mu$ g).
