# Supplementary material for: Proteomic analysis reveals the negative modulator of sperm function glycodelin as over-represented in semen exosomes isolated from asthenozoospermic patients
Source: Oxford University Press journal article supplement (doi:10.1093/humrep/dez114), 2019-06-13
Supplement: s3_dez114.pdf [file s3_dez114.pdf]

**Supplementary Table SII** Proteins that were significantly differentially expressed in the evaluation cohort with more than a 1.5 fold-change.

| Overexpressed Proteins in Semen Exosomes from Normozoospermic Men |                                                                    |             |
|-------------------------------------------------------------------|--------------------------------------------------------------------|-------------|
| Gene Name                                                         | Protein                                                            | fold change |
| HSPA1L                                                            | Heat shock 70 kDa protein 1-like                                   | 4,1         |
| SLC2A14                                                           | Solute carrier family 2, facilitated glucose transporter member 14 | 3,3         |
| KIAA1012;TRAPPC8                                                  | Trafficking protein particle complex subunit 8                     | 2,3         |
| PGK2                                                              | Phosphoglycerate kinase 2;Phosphoglycerate kinase                  | 2,3         |
| EDARADD                                                           | EDAR-associated death domain                                       | 3,5         |
| DPEP3                                                             | Dipeptidase 3                                                      | 4,9         |
| HK1                                                               | Hexokinase-1                                                       | 3,9         |
| CUTA                                                              | Protein CutA                                                       | 2,7         |
| HEL-S-292                                                         | Epididymis secretory protein Li 292                                | 3,0         |
| DYSF                                                              | Dysferlin                                                          | 2,0         |
| OVCH2                                                             | Ovochymase-2                                                       | 4,0         |
| SPAG11B                                                           | Sperm-associated antigen 11B                                       | 3,0         |
| N/A                                                               | Uncharacterized protein                                            | 3,0         |
| HP;HPR                                                            | Haptoglobin                                                        | 1,9         |
| ACTG1                                                             | Actin, cytoplasmic 2;Actin, cytoplasmic 2. N-terminally processed  | 1,7         |
| THBS2                                                             | Thrombospondin-2                                                   | 3,0         |
| COL6A2                                                            | Collagen alpha-2(VI) chain                                         | 2,9         |
| A2M                                                               | Alpha-2-macroglobulin                                              | 1,6         |
| CRISP1                                                            | Cysteine-rich secretory protein 1                                  | 3,3         |
| DEFB126                                                           | Beta-defensin 126                                                  | 3,0         |
| COMP                                                              | Cartilage oligomeric matrix protein                                | 2,2         |
| HEL-S-163pA;A1BG                                                  | Alpha-1B-glycoprotein                                              | 2,0         |
| CYB5R2                                                            | NADH-cytochrome b5 reductase 2                                     | 2,5         |
| LIPI                                                              | Lipase member 1                                                    | 2,8         |
| PTGDS                                                             | Prostaglandin-H2 D-isomerase                                       | 2,2         |
| LZTFL1                                                            | Leucine zipper transcription factor-like protein 1                 | 2,1         |
| FGG;DKFZp779N0926                                                 | Fibrinogen gamma chain                                             | 2,1         |
| DPCD                                                              | Protein DPCD                                                       | 2,7         |
| ACSBG2                                                            | Long-chain-fatty-acid-CoA ligase ACSBG2                            | 3,1         |
| VCP                                                               | Transitional endoplasmic reticulum ATPase                          | 2,6         |
| HEL-117;UCHL1                                                     | Ubiquitin carboxyl-terminal hydrolase isozyme L1                   | 2,1         |
| REG3G                                                             | Regenerating islet-derived protein 3-gamma                         | 3,2         |
| N/A                                                               | cDNA FLJ53691. highly similar to Serotransferrin                   | 5,0         |
| AQP5                                                              | Aquaporin-5                                                        | 4,4         |

Continued

**Supplementary Table SII** *Continued*

| <b>Overexpressed Proteins in Semen Exosomes from Normozoospermic Men</b> |                                                                                  |                    |
|--------------------------------------------------------------------------|----------------------------------------------------------------------------------|--------------------|
| <b>Gene Name</b>                                                         | <b>Protein</b>                                                                   | <b>fold change</b> |
| PAM                                                                      | Peptidyl-glycine alpha-amidating monooxygenase                                   | 3,2                |
| CFI                                                                      | Complement factor I                                                              | 4,5                |
| NEDD8-MDPI;NEDD8;MDPI                                                    | Magnesium-dependent phosphatase I                                                | 3,8                |
| <b>Overexpressed Protein in SEs from Severe Asthenozoospermic men</b>    |                                                                                  |                    |
| <b>Gene Name</b>                                                         | <b>Protein</b>                                                                   | <b>fold change</b> |
| PGC                                                                      | Gastricsin                                                                       | 3,3                |
| N/A                                                                      | Uncharacterized protein                                                          | 3,0                |
| WBP2                                                                     | WW domain-binding protein 2                                                      | 4,1                |
| OAF                                                                      | Out at first protein homolog                                                     | 3,3                |
| UBE2Z                                                                    | Ubiquitin-conjugating enzyme E2 Z                                                | 3,1                |
| OSTFI                                                                    | Osteoclast-stimulating factor I                                                  | 3,2                |
| NEDD4L;ZNF227                                                            | E3 ubiquitin-protein ligase NEDD4-like;E3 ubiquitin-protein ligase               | 2,6                |
| AQP2                                                                     | Aquaporin-2                                                                      | 4,2                |
| SFRP5                                                                    | Secreted frizzled-related protein 5                                              | 4,8                |
| RHEB                                                                     | GTP-binding protein Rheb                                                         | 2,4                |
| ABII                                                                     | Abl interactor I                                                                 | 2,7                |
| CLN5                                                                     | Ceroid-lipofuscinosis neuronal protein 5                                         | 2,2                |
| APOD                                                                     | Apolipoprotein D                                                                 | 2,2                |
| PSMB8;PSM8                                                               | Proteasome subunit beta type;Proteasome subunit beta type-8                      | 2,1                |
| SLC9A3R2                                                                 | Na(+)/H(+) exchange regulatory cofactor NHE-RF2                                  | 2,2                |
| GBA                                                                      | Glucosylceramidase                                                               | 2,8                |
| MXRA5                                                                    | Matrix-remodeling-associated protein 5                                           | 3,6                |
| LYPLAL1                                                                  | Lysophospholipase-like protein I                                                 | 2,2                |
| RALB                                                                     | V-ral simian leukemia viral oncogene homolog B (Ras related GTP binding protein) | 3,7                |
| RPL18                                                                    | 60S ribosomal protein L18                                                        | 2,8                |
| SLC26A3;DKFZp686P10213                                                   | Chloride anion exchanger                                                         | 3,0                |
| PCBD;PCBD1                                                               | Pterin-4-alpha-carbinolamine dehydratase                                         | 3,0                |
| TMCS                                                                     | Transmembrane channel-like protein                                               | 2,9                |
| VPS25                                                                    | Vacuolar protein-sorting-associated protein 25                                   | 4,0                |
| CHMP1B                                                                   | Charged multivesicular body protein 1b                                           | 3,2                |
| PPP6C                                                                    | Serine/threonine-protein phosphatase                                             | 3,7                |
| SYTI                                                                     | Synaptotagmin-1                                                                  | 3,6                |
| AKAP7                                                                    | A-kinase anchor protein 7 isoforms alpha and beta                                | 2,7                |
| GNB2                                                                     | guanine nucleotide binding protein (G protein). beta polypeptide 2               | 2,8                |
| NT5E                                                                     | 5-nucleotidase                                                                   | 2,7                |
| MSLN                                                                     | Mesothelin;Megakaryocyte-potentiating factor                                     | 1,6                |
| SRPR                                                                     | Signal recognition particle receptor subunit alpha                               | 4,2                |
| SPINT2                                                                   | Kunitz-type protease inhibitor 2                                                 | 3,1                |
| GSTM1;GSTM4                                                              | Glutathione S-transferase Mu 1;Glutathione S-transferase Mu 4                    | 1,8                |
| DKFZp779K0533;GP2                                                        | Pancreatic secretory granule membrane major glycoprotein GP2                     | 2,4                |

*Continued*

**Supplementary Table SII** *Continued*

| <b>Overexpressed Protein in SEs from Severe Asthenozoospermic men</b> |                                                                          |                    |
|-----------------------------------------------------------------------|--------------------------------------------------------------------------|--------------------|
| <b>Gene Name</b>                                                      | <b>Protein</b>                                                           | <b>fold change</b> |
| SI                                                                    | Sucrase-isomaltase. intestinal;Sucrase;Isomaltase; $\alpha$ -glucosidase | 1,8                |
| RAB6A;RAB6B                                                           | Ras-related protein Rab-6A                                               | 1,7                |
| CD63                                                                  | CD63 antigen                                                             | 2,1                |
| TSPAN8                                                                | Tetraspanin-8                                                            | 3,1                |
| PDCD6;hCG_1985580                                                     | Programmed cell death protein 6                                          | 2,6                |
| CIQTNF1                                                               | Complement C1q tumor necrosis factor-related protein 1                   | 2,8                |
| THADA                                                                 | Thyroid adenoma-associated protein                                       | 4,2                |
| DAG1                                                                  | Dystroglycan;Alpha-dystroglycan;Beta-dystroglycan                        | 4,2                |
| RARRES1                                                               | Retinoic acid receptor responder protein 1                               | 3,5                |
| ENTPD2                                                                | Ectonucleoside triphosphate diphosphohydrolase 2                         | 4,2                |
| MATN4                                                                 | Matrilin-4                                                               | 3,3                |
| TGM4                                                                  | Protein-glutamine gamma-glutamyltransferase 4                            | 2,0                |
| CDC42BPA                                                              | CDC42 binding protein kinase alpha (DMPK-like)                           | 2,1                |
| DEFA3;DEFA1                                                           | Neutrophil defensin                                                      | 2,3                |
| PAEP                                                                  | Glycodelin                                                               | 5,6                |
| PSCA                                                                  | Prostate stem cell antigen                                               | 3,9                |
