# Supplementary material for: Proteomic analysis reveals the negative modulator of sperm function glycodelin as over-represented in semen exosomes isolated from asthenozoospermic patients
Source: Oxford University Press journal article supplement (doi:10.1093/humrep/dez114), 2019-06-13
Supplement: suppl.table_1_hr_dez114.xls [file suppl.table_1_hr_dez114.xls]

## Sheet: proteinGroups
	Majority protein IDs	Peptide counts (all)	Peptide counts (razor+unique)	Peptide counts (unique)	Protein names	Gene names	Fasta headers	Number of proteins	Peptides	Razor + unique peptides	Unique peptides	Peptides A10	Peptides A10_r	Peptides A2	Peptides A2_r	Peptides A4	Peptides A4_r	Peptides NSP_10	Peptides NSP_10_r	Peptides NSP_12	Peptides NSP_12_r	Peptides NSP_14	Peptides NSP_14_r	Peptides NSP_16	Peptides NSP_16_r	Peptides NSP_20	Peptides NSP_20_r	Peptides OAT_11	Peptides OAT_11_r	Peptides OAT_16	Peptides OAT_16_r	Peptides OAT_9	Peptides OAT_9_r	Razor + unique peptides A10	Razor + unique peptides A10_r	Razor + unique peptides A2	Razor + unique peptides A2_r	Razor + unique peptides A4	Razor + unique peptides A4_r	Razor + unique peptides NSP_10	Razor + unique peptides NSP_10_r	Razor + unique peptides NSP_12	Razor + unique peptides NSP_12_r	Razor + unique peptides NSP_14	Razor + unique peptides NSP_14_r	Razor + unique peptides NSP_16	Razor + unique peptides NSP_16_r	Razor + unique peptides NSP_20	Razor + unique peptides NSP_20_r
	B3KSG9;A0A024QYR8;Q99805	4;4;4	4;4;4	4;4;4	Transmembrane 9 superfamily member 2	TM9SF2	>tr|B3KSG9|B3KSG9_HUMAN Transmembrane 9 superfamily member OS=Homo sapiens PE=2 SV=1;>tr|A0A024QYR8|A0A024QYR8_HUMAN Transmembrane 9 superfamily member OS=Homo sapiens GN=TM9SF2 PE=2 SV=1;>sp|Q99805|TM9S2_HUMAN Transmembrane 9 superfamily member 2 OS=Homo	3	4	4	4	0	0	0	0	3	3	0	0	1	2	0	0	0	0	0	0	0	0	0	0	0	0	0	0	0	0	3	3	0	0	1	2	0	0	0	0	0	0
Q5TB53;Q96JZ5;A0A024QYS2;Q9HD45;Q8WUB5	Q5TB53;Q96JZ5;A0A024QYS2;Q9HD45;Q8WUB5	2;2;2;2;1	2;2;2;2;1	2;2;2;2;1	Transmembrane 9 superfamily member 3	TM9SF3;SMBP	>tr|Q5TB53|Q5TB53_HUMAN Transmembrane 9 superfamily member (Fragment) OS=Homo sapiens GN=TM9SF3 PE=1 SV=8;>tr|Q96JZ5|Q96JZ5_HUMAN Transmembrane 9 superfamily member OS=Homo sapiens GN=SMBP PE=2 SV=1;>tr|A0A024QYS2|A0A024QYS2_HUMAN Transmembrane 9 superfami	5	2	2	2	0	0	0	0	0	0	0	0	1	1	0	0	1	1	0	0	0	0	0	0	0	0	0	0	0	0	0	0	0	0	1	1	0	0	1	1	0	0
A0A024QYT6;H7C1E4;P61966;Q7Z677;H7BZG6;B7Z853;H0Y673;Q549M9;F6SFB5;A6NH01;B7Z3M9;A0A024RBX8;B4DIM6;P56377	A0A024QYT6;H7C1E4;P61966	5;5;5;1;1;1;1;1;1;1;1;1;1;1	5;5;5;1;1;1;1;1;1;1;1;1;1;1	5;5;5;1;1;1;1;1;1;1;1;1;1;1	AP-1 complex subunit sigma-1A	AP1S1	>tr|A0A024QYT6|A0A024QYT6_HUMAN Adaptor-related protein complex 1, sigma 1 subunit, isoform CRA_b OS=Homo sapiens GN=AP1S1 PE=4 SV=1;>tr|H7C1E4|H7C1E4_HUMAN AP-1 complex subunit sigma-1A (Fragment) OS=Homo sapiens GN=AP1S1 PE=1 SV=1;>sp|P61966|AP1S1_HUMAN	14	5	5	5	1	1	2	2	5	5	2	2	2	2	0	0	2	2	1	1	2	2	2	2	3	3	1	1	2	2	5	5	2	2	2	2	0	0	2	2	1	1
B4DVQ5;A1KYQ7;A0A024QYU9;Q99613;B5ME19;B4DRU0;B4DVU3;B4DDN4;B4E2Z6;A0A024QYX7;B3KNZ4;Q3B7B9;H3BPE4;H3BPE3;H3BTY8	B4DVQ5;A1KYQ7;A0A024QYU9;Q99613;B5ME19;B4DRU0;B4DVU3;B4DDN4;B4E2Z6;A0A024QYX7;B3KNZ4	19;19;19;19;19;18;18;18;16;15;15;4;3;2;1	19;19;19;19;19;18;18;18;16;15;15;4;3;2;1	19;19;19;19;19;18;18;18;16;15;15;4;3;2;1	Eukaryotic translation initiation factor 3 subunit C;Eukaryotic translation initiation factor 3 subunit C-like protein	EIF3C;EIF3S8;EIF3CL	>tr|B4DVQ5|B4DVQ5_HUMAN Eukaryotic translation initiation factor 3 subunit C OS=Homo sapiens GN=EIF3C PE=2 SV=1;>tr|A1KYQ7|A1KYQ7_HUMAN Eukaryotic translation initiation factor 3 subunit C OS=Homo sapiens GN=EIF3C PE=2 SV=1;>tr|A0A024QYU9|A0A024QYU9_HUMAN	15	19	19	19	3	2	4	3	8	8	4	4	6	5	0	0	9	7	4	4	5	5	1	4	2	5	3	2	4	3	8	8	4	4	6	5	0	0	9	7	4	4
B7Z2X6;B7Z440;B7Z2G0;B7Z9M4;A0A024QYX2;B7Z831;Q9NZH0	B7Z2X6;B7Z440;B7Z2G0;B7Z9M4;A0A024QYX2;B7Z831;Q9NZH0	4;4;4;4;4;4;4	4;4;4;4;4;4;4	4;4;4;4;4;4;4	G-protein coupled receptor family C group 5 member B	GPRC5B	>tr|B7Z2X6|B7Z2X6_HUMAN cDNA FLJ52145, highly similar to G-protein coupled receptor family C group 5 member B OS=Homo sapiens PE=2 SV=1;>tr|B7Z440|B7Z440_HUMAN cDNA FLJ53055, highly similar to G-protein coupled receptor family C group 5 member B OS=Homo sa	7	4	4	4	2	3	3	3	3	3	1	1	2	2	1	1	3	3	1	1	1	1	3	3	3	3	2	3	3	3	3	3	1	1	2	2	1	1	3	3	1	1
B2R7R5;A0A024QYY3;O60256;E7EPA1;C9JDU5;C9JJS3;C9K0K7;C9JDH0;E7EW35;I3L4G9;I3L0S1;I3L331;I3L164;Q6ZTP6	B2R7R5;A0A024QYY3;O60256;E7EPA1;C9JDU5;C9JJS3;C9K0K7	9;9;9;7;5;5;5;4;4;3;3;2;2;2	9;9;9;7;5;5;5;4;4;3;3;2;2;2	8;8;8;6;5;5;5;4;4;2;2;2;2;2	Phosphoribosyl pyrophosphate synthase-associated protein 2	PRPSAP2	>tr|B2R7R5|B2R7R5_HUMAN cDNA, FLJ93570, highly similar to Homo sapiens phosphoribosyl pyrophosphate synthetase-associated protein 2 (PRPSAP2), mRNA OS=Homo sapiens PE=2 SV=1;>tr|A0A024QYY3|A0A024QYY3_HUMAN Phosphoribosyl pyrophosphate synthetase-associated	14	9	9	8	2	3	1	1	5	6	0	0	4	4	0	0	5	5	2	1	0	0	3	3	4	4	2	3	1	1	5	6	0	0	4	4	0	0	5	5	2	1
B4DQ24;B4DIW7;B4E2A4;A0A024QYY9;Q5M775	B4DQ24;B4DIW7;B4E2A4;A0A024QYY9;Q5M775	2;2;2;2;2	2;2;2;2;2	2;2;2;2;2	Cytospin-B	SPECC1	>tr|B4DQ24|B4DQ24_HUMAN cDNA FLJ54420, highly similar to Homo sapiens spectrin domain with coiled-coils 1 (SPECC1), transcript variant, mRNA OS=Homo sapiens PE=2 SV=1;>tr|B4DIW7|B4DIW7_HUMAN cDNA FLJ54411, highly similar to Homo sapiens spectrin domain wit	5	2	2	2	0	0	0	0	0	0	0	0	0	0	0	0	0	0	0	0	0	0	0	0	2	2	0	0	0	0	0	0	0	0	0	0	0	0	0	0	0	0
A0A024QYZ6;O60645;D6RB59;Q69YP2;Q6ZNJ2;H0Y995;D6RBR9;B2RE06	A0A024QYZ6;O60645;D6RB59;Q69YP2;Q6ZNJ2;H0Y995	18;18;17;15;10;10;2;2	18;18;17;15;10;10;2;2	18;18;17;15;10;10;2;2	Exocyst complex component 3	EXOC3;DKFZp762K123;FLJ00339	>tr|A0A024QYZ6|A0A024QYZ6_HUMAN Exocyst complex component 3, isoform CRA_a OS=Homo sapiens GN=EXOC3 PE=4 SV=1;>sp|O60645|EXOC3_HUMAN Exocyst complex component 3 OS=Homo sapiens GN=EXOC3 PE=1 SV=2;>tr|D6RB59|D6RB59_HUMAN Exocyst complex component 3 OS=Homo	8	18	18	18	1	1	6	8	8	9	3	4	4	3	1	1	10	10	5	6	3	3	7	8	7	7	1	1	6	8	8	9	3	4	4	3	1	1	10	10	5	6
B7ZAR0;B4DPB6;A0A024QZ03;O60826;B4DLA4	B7ZAR0;B4DPB6;A0A024QZ03;O60826;B4DLA4	3;3;3;3;2	3;3;3;3;2	3;3;3;3;2	Coiled-coil domain-containing protein 22	CCDC22	>tr|B7ZAR0|B7ZAR0_HUMAN cDNA, FLJ79274, highly similar to Coiled-coil domain-containing protein 22 OS=Homo sapiens PE=2 SV=1;>tr|B4DPB6|B4DPB6_HUMAN cDNA FLJ56537, highly similar to Coiled-coil domain-containing protein 22 OS=Homo sapiens PE=2 SV=1;>tr|A0A	5	3	3	3	0	0	1	1	0	0	1	1	0	0	0	0	2	3	0	0	1	1	0	0	0	0	0	0	1	1	0	0	1	1	0	0	0	0	2	3	0	0
B4DJ17;A0A024QZ44;A0A024QZ15;Q96NT5;J3QRF7	B4DJ17;A0A024QZ44;A0A024QZ15;Q96NT5;J3QRF7	2;2;2;2;1	2;2;2;2;1	2;2;2;2;1	Proton-coupled folate transporter	HCP1;SLC46A1	>tr|B4DJ17|B4DJ17_HUMAN cDNA FLJ58315, highly similar to Heme carrier protein 1 OS=Homo sapiens PE=2 SV=1;>tr|A0A024QZ44|A0A024QZ44_HUMAN Heme carrier protein 1, isoform CRA_b OS=Homo sapiens GN=HCP1 PE=4 SV=1;>tr|A0A024QZ15|A0A024QZ15_HUMAN Heme carrier p	5	2	2	2	0	0	0	0	0	1	0	0	0	0	0	0	0	0	1	1	0	0	0	0	0	0	0	0	0	0	0	1	0	0	0	0	0	0	0	0	1	1
B3KMC3;B3KNA1;B3KVK5;B3KT76;Q9NZS3;B4DZN1;Q9NSW6;A0A024QZ26;B4DZH6;Q9UBN7	B3KMC3;B3KNA1;B3KVK5;B3KT76;Q9NZS3;B4DZN1;Q9NSW6;A0A024QZ26;B4DZH6;Q9UBN7	3;3;3;3;3;3;3;3;3;3	3;3;3;3;3;3;3;3;3;3	3;3;3;3;3;3;3;3;3;3	Histone deacetylase 6	DKFZp566E044;HDAC6	>tr|B3KMC3|B3KMC3_HUMAN cDNA FLJ10681 fis, clone NT2RP3000031, highly similar to Histone deacetylase 6 OS=Homo sapiens PE=2 SV=1;>tr|B3KNA1|B3KNA1_HUMAN cDNA FLJ14021 fis, clone HEMBA1002513, highly similar to Histone deacetylase 6 (Fragment) OS=Homo sapie	10	3	3	3	0	0	1	1	1	2	0	0	0	0	0	0	1	1	0	0	0	0	0	0	0	0	0	0	1	1	1	2	0	0	0	0	0	0	1	1	0	0
A0A024QZ34;K7ES70;P55083;REV__G3V2U4;REV__Q9P2D8	A0A024QZ34;K7ES70;P55083	4;4;4;1;1	4;4;4;1;1	4;4;4;1;1	Microfibril-associated glycoprotein 4	MFAP4	>tr|A0A024QZ34|A0A024QZ34_HUMAN Microfibrillar-associated protein 4, isoform CRA_a OS=Homo sapiens GN=MFAP4 PE=4 SV=1;>tr|K7ES70|K7ES70_HUMAN Microfibril-associated glycoprotein 4 OS=Homo sapiens GN=MFAP4 PE=1 SV=1;>sp|P55083|MFAP4_HUMAN Microfibril-associ	5	4	4	4	0	0	0	0	3	3	1	1	0	0	1	1	1	0	0	0	0	0	0	0	0	0	0	0	0	0	3	3	1	1	0	0	1	1	1	0	0	0
A0A024QZ35;A0A0A0MSE9;B7WPA5;Q96CS7;B4DJB7;A0A0A0MSI4	A0A024QZ35;A0A0A0MSE9;B7WPA5;Q96CS7;B4DJB7;A0A0A0MSI4	5;5;5;5;4;3	5;5;5;5;4;3	5;5;5;5;4;3	Pleckstrin homology domain-containing family B member 2	PLEKHB2	>tr|A0A024QZ35|A0A024QZ35_HUMAN Pleckstrin homology domain containing, family B (Evectins) member 2, isoform CRA_b OS=Homo sapiens GN=PLEKHB2 PE=4 SV=1;>tr|A0A0A0MSE9|A0A0A0MSE9_HUMAN Pleckstrin homology domain-containing family B member 2 OS=Homo sapiens	6	5	5	5	1	1	3	2	4	4	1	2	1	1	0	0	2	2	1	1	2	2	1	1	2	2	1	1	3	2	4	4	1	2	1	1	0	0	2	2	1	1
Q6FG43;J3QLD9;A0A024QZ62;E7EMK3;Q14254;Q9BTI6;K7EKW9	Q6FG43;J3QLD9;A0A024QZ62;E7EMK3;Q14254;Q9BTI6;K7EKW9	11;11;11;11;11;9;6	11;11;11;11;11;9;6	11;11;11;11;11;9;6	Flotillin-2	FLOT2;hCG_1998851	>tr|Q6FG43|Q6FG43_HUMAN FLOT2 protein OS=Homo sapiens GN=FLOT2 PE=2 SV=1;>tr|J3QLD9|J3QLD9_HUMAN Flotillin-2 OS=Homo sapiens GN=FLOT2 PE=1 SV=1;>tr|A0A024QZ62|A0A024QZ62_HUMAN HCG1998851, isoform CRA_c OS=Homo sapiens GN=hCG_1998851 PE=4 SV=1;>tr|E7EMK3|E7	7	11	11	11	4	4	6	5	4	4	2	2	5	6	3	3	9	9	5	5	3	2	7	7	6	6	4	4	6	5	4	4	2	2	5	6	3	3	9	9	5	5
A0A024QZ64;P09972;B7Z1N6;B7Z1Y2;B7Z3K9;B7Z3K7;A8MVZ9;B7Z1Z9;B7Z1L5;J3KSV6;J3QKP5;K7EKH5;C9J8F3;J3QKK1;B7Z1H6;Q8NHT3;A0A087WXX2;A8K430;A0A024R145;P05062	A0A024QZ64;P09972;B7Z1N6;B7Z1Y2;B7Z3K9;B7Z3K7;A8MVZ9;B7Z1Z9;B7Z1L5	21;21;20;20;19;17;17;16;12;8;8;7;6;4;4;2;2;2;2;2	15;15;14;14;13;12;15;10;8;7;7;6;5;4;4;1;1;1;1;1	15;15;14;14;13;12;15;10;8;7;7;6;5;4;4;1;1;1;1;1	Fructose-bisphosphate aldolase C	ALDOC	>tr|A0A024QZ64|A0A024QZ64_HUMAN Fructose-bisphosphate aldolase OS=Homo sapiens GN=ALDOC PE=3 SV=1;>sp|P09972|ALDOC_HUMAN Fructose-bisphosphate aldolase C OS=Homo sapiens GN=ALDOC PE=1 SV=2;>tr|B7Z1N6|B7Z1N6_HUMAN Fructose-bisphosphate aldolase OS=Homo sapi	20	21	15	15	7	8	8	8	15	14	8	7	9	9	2	3	16	15	9	9	8	8	10	9	11	12	3	4	4	4	11	10	7	6	4	4	0	0	11	10	8	7
C9JBG0;Q96PJ7;Q6NXT3;A0A024QZ68;E7ES60;B4DNC0;Q9BZG1;V9GY61;K7EJW7;K7EIF2;J3QLC6;H7C0Y7;C9JY26	C9JBG0;Q96PJ7;Q6NXT3;A0A024QZ68;E7ES60;B4DNC0;Q9BZG1;V9GY61;K7EJW7;K7EIF2;J3QLC6;H7C0Y7;C9JY26	2;2;2;2;2;2;2;1;1;1;1;1;1	2;2;2;2;2;2;2;1;1;1;1;1;1	2;2;2;2;2;2;2;1;1;1;1;1;1	Ras-related protein Rab-34	RAB34	>tr|C9JBG0|C9JBG0_HUMAN Ras-related protein Rab-34, isoform NARR (Fragment) OS=Homo sapiens GN=RAB34 PE=1 SV=8;>tr|Q96PJ7|Q96PJ7_HUMAN Ras-related GTP-binding protein RAB39 OS=Homo sapiens GN=RAB34 PE=1 SV=1;>tr|Q6NXT3|Q6NXT3_HUMAN RAB34 protein OS=Homo sa	13	2	2	2	0	0	0	0	0	0	0	0	0	0	0	0	2	2	0	0	0	0	0	0	0	0	0	0	0	0	0	0	0	0	0	0	0	0	2	2	0	0
A0A024QZ77;Q96C19;H0Y4Y4;C9JTV4;Q8WYH2;Q53SA2;Q7Z2R5;B4DEE0;A0A087X1Z2;A0A024R493;Q59EU6;Q9BUP0	A0A024QZ77;Q96C19;H0Y4Y4	6;6;5;1;1;1;1;1;1;1;1;1	6;6;5;1;1;1;1;1;1;1;1;1	6;6;5;1;1;1;1;1;1;1;1;1	EF-hand domain-containing protein D2	EFHD2	>tr|A0A024QZ77|A0A024QZ77_HUMAN EF-hand domain family, member D2, isoform CRA_a OS=Homo sapiens GN=EFHD2 PE=2 SV=1;>sp|Q96C19|EFHD2_HUMAN EF-hand domain-containing protein D2 OS=Homo sapiens GN=EFHD2 PE=1 SV=1;>tr|H0Y4Y4|H0Y4Y4_HUMAN EF-hand domain-contain	12	6	6	6	1	1	2	2	4	4	0	0	3	3	0	0	1	1	1	1	0	0	1	2	2	2	1	1	2	2	4	4	0	0	3	3	0	0	1	1	1	1
Q68DY7;B4DL69;Q69YM2;A0A024QZ90;I3L352;I3L0H8;Q2NL95;Q9HBZ9;Q7Z4W5;Q53G16;F6QDS0;A0A0U4B4U6;H3BQK0;Q9NUU7;Q9UMR2;Q59FQ9;B4DS24;H3BMQ5;H3BN59	Q68DY7;B4DL69;Q69YM2;A0A024QZ90;I3L352;I3L0H8;Q2NL95;Q9HBZ9;Q7Z4W5;Q53G16;F6QDS0;A0A0U4B4U6;H3BQK0;Q9NUU7;Q9UMR2;Q59FQ9;B4DS24	11;11;11;11;11;11;11;11;11;11;11;11;11;11;11;10;10;1;1	11;11;11;11;11;11;11;11;11;11;11;11;11;11;11;10;10;1;1	11;11;11;11;11;11;11;11;11;11;11;11;11;11;11;10;10;1;1	ATP-dependent RNA helicase DDX19A;ATP-dependent RNA helicase DDX19B	DKFZp686C21137;hCG_1998531;DKFZp762C1313;DDX19A;DDX19B;DDX19L	>tr|Q68DY7|Q68DY7_HUMAN Putative uncharacterized protein DKFZp686C21137 OS=Homo sapiens GN=DKFZp686C21137 PE=2 SV=1;>tr|B4DL69|B4DL69_HUMAN HCG1998531, isoform CRA_d OS=Homo sapiens GN=hCG_1998531 PE=2 SV=1;>tr|Q69YM2|Q69YM2_HUMAN Putative uncharacterized	19	11	11	11	4	2	2	2	4	6	1	1	2	2	0	0	6	6	2	2	1	1	2	2	5	4	4	2	2	2	4	6	1	1	2	2	0	0	6	6	2	2
A0A024QZ95;Q6UX06;B4DV64	A0A024QZ95;Q6UX06;B4DV64	21;21;16	21;21;16	21;21;16	Olfactomedin-4	OLFM4	>tr|A0A024QZ95|A0A024QZ95_HUMAN Olfactomedin 4, isoform CRA_a OS=Homo sapiens GN=OLFM4 PE=4 SV=1;>sp|Q6UX06|OLFM4_HUMAN Olfactomedin-4 OS=Homo sapiens GN=OLFM4 PE=1 SV=1;>tr|B4DV64|B4DV64_HUMAN cDNA FLJ61420, highly similar to Homo sapiens olfactomedin 4 (	3	21	21	21	8	8	11	11	14	14	14	14	9	9	6	6	9	9	2	2	7	7	5	5	9	9	8	8	11	11	14	14	14	14	9	9	6	6	9	9	2	2
H3BRY5;A0A024QZB4;P50226;P50225;H3BQX5;E9PKR8;Q59GG0;E9PKW4;Q2TAB3;Q1ET65;Q1ET64;Q1ET63;Q1ET62;Q1ET61;B3KT14;A0A0A6YYL2;P0DMN0;P0DMM9	H3BRY5;A0A024QZB4;P50226;P50225;H3BQX5;E9PKR8;Q59GG0;E9PKW4;Q2TAB3;Q1ET65;Q1ET64;Q1ET63;Q1ET62;Q1ET61;B3KT14;A0A0A6YYL2;P0DMN0;P0DMM9	2;2;2;2;1;1;1;1;1;1;1;1;1;1;1;1;1;1	2;2;2;2;1;1;1;1;1;1;1;1;1;1;1;1;1;1	2;2;2;2;1;1;1;1;1;1;1;1;1;1;1;1;1;1	Sulfotransferase;Sulfotransferase 1A2;Sulfotransferase 1A1;Sulfotransferase 1A4;Sulfotransferase 1A3	SULT1A1;hCG_1993905;SULT1A2;SULT1A4;ST1A5;SULT1A3	>tr|H3BRY5|H3BRY5_HUMAN Sulfotransferase (Fragment) OS=Homo sapiens GN=SULT1A1 PE=1 SV=1;>tr|A0A024QZB4|A0A024QZB4_HUMAN Sulfotransferase OS=Homo sapiens GN=hCG_1993905 PE=3 SV=1;>sp|P50226|ST1A2_HUMAN Sulfotransferase 1A2 OS=Homo sapiens GN=SULT1A2 PE=1 S	18	2	2	2	1	2	0	0	0	0	1	1	0	0	1	1	0	0	0	0	0	0	0	0	2	2	1	2	0	0	0	0	1	1	0	0	1	1	0	0	0	0
G3V203;A0A024QZD1;J3QQ67;Q07020;Q0QEW2;H0YHA7;F8VUA6;F8VYV2;B4DDY5;F8VXR6	G3V203;A0A024QZD1;J3QQ67;Q07020;Q0QEW2;H0YHA7;F8VUA6;F8VYV2;B4DDY5	8;8;8;8;7;7;5;5;5;1	8;8;8;8;7;7;5;5;5;1	3;3;3;3;3;3;3;0;0;0	60S ribosomal protein L18	RPL18	>tr|G3V203|G3V203_HUMAN 60S ribosomal protein L18 OS=Homo sapiens GN=RPL18 PE=1 SV=1;>tr|A0A024QZD1|A0A024QZD1_HUMAN Ribosomal protein L18, isoform CRA_c OS=Homo sapiens GN=RPL18 PE=4 SV=1;>tr|J3QQ67|J3QQ67_HUMAN 60S ribosomal protein L18 (Fragment) OS=Hom	10	8	8	3	3	3	2	2	5	5	0	0	2	2	1	1	4	5	1	1	2	3	4	4	1	2	3	3	2	2	5	5	0	0	2	2	1	1	4	5	1	1
E2GIM8;E2GIM6;M0R3C2;M0QYT9;E2GIM7;E2GIM9;E2GIM5;A0A024QZE1;Q14653	E2GIM8;E2GIM6;M0R3C2;M0QYT9;E2GIM7;E2GIM9;E2GIM5;A0A024QZE1;Q14653	2;2;2;2;2;2;2;2;2	2;2;2;2;2;2;2;2;2	2;2;2;2;2;2;2;2;2	Interferon regulatory factor 3	IRF3	>tr|E2GIM8|E2GIM8_HUMAN Interferon regulatory factor 3d OS=Homo sapiens GN=IRF3 PE=2 SV=1;>tr|E2GIM6|E2GIM6_HUMAN Interferon regulatory factor 3b OS=Homo sapiens GN=IRF3 PE=2 SV=1;>tr|M0R3C2|M0R3C2_HUMAN Interferon regulatory factor 3 (Fragment) OS=Homo sa	9	2	2	2	0	0	0	0	0	0	0	0	0	0	0	0	2	1	0	0	0	0	0	0	0	0	0	0	0	0	0	0	0	0	0	0	0	0	2	1	0	0
A0A024QZF2;P10301	A0A024QZF2;P10301	12;12	12;12	9;9	Ras-related protein R-Ras	RRAS	>tr|A0A024QZF2|A0A024QZF2_HUMAN Related RAS viral (R-ras) oncogene homolog, isoform CRA_a OS=Homo sapiens GN=RRAS PE=4 SV=1;>sp|P10301|RRAS_HUMAN Ras-related protein R-Ras OS=Homo sapiens GN=RRAS PE=1 SV=1	2	12	12	9	5	5	4	4	9	10	4	4	4	4	2	2	7	7	3	3	5	5	5	5	7	7	5	5	4	4	9	10	4	4	4	4	2	2	7	7	3	3
Q9UQL0;A0A087WW00;C9J9H9;A0A024RA90;A0A024QZJ2;Q9Y2X8;P51668	Q9UQL0;A0A087WW00;C9J9H9;A0A024RA90;A0A024QZJ2;Q9Y2X8;P51668	2;2;2;2;2;2;2	1;1;1;1;1;1;1	1;1;1;1;1;1;1	Ubiquitin-conjugating enzyme E2 D4;Ubiquitin-conjugating enzyme E2 D1	UBE2D4;UBE2D1	>tr|Q9UQL0|Q9UQL0_HUMAN Ubiquitin-conjugating enzyme 1 isoform OS=Homo sapiens GN=UBE2D4 PE=2 SV=1;>tr|A0A087WW00|A0A087WW00_HUMAN Ubiquitin-conjugating enzyme E2 D1 OS=Homo sapiens GN=UBE2D1 PE=1 SV=1;>tr|C9J9H9|C9J9H9_HUMAN Ubiquitin-conjugating enzyme E	7	2	1	1	0	0	0	0	1	1	0	0	1	1	0	0	0	0	1	1	0	0	1	1	0	0	0	0	0	0	0	0	0	0	1	1	0	0	0	0	1	1
Q05CP8;A0A024QZJ7;Q16204;Q15302;J7M8C2;J7MDF2	Q05CP8;A0A024QZJ7;Q16204	8;8;8;2;2;2	8;8;8;2;2;2	8;8;8;2;2;2	Coiled-coil domain-containing protein 6	CCDC6	>tr|Q05CP8|Q05CP8_HUMAN CCDC6 protein (Fragment) OS=Homo sapiens GN=CCDC6 PE=2 SV=1;>tr|A0A024QZJ7|A0A024QZJ7_HUMAN Coiled-coil domain containing 6, isoform CRA_a OS=Homo sapiens GN=CCDC6 PE=4 SV=1;>sp|Q16204|CCDC6_HUMAN Coiled-coil domain-containing prote	6	8	8	8	1	2	3	3	0	0	3	3	0	0	0	0	1	1	2	2	1	1	1	1	2	2	1	2	3	3	0	0	3	3	0	0	0	0	1	1	2	2
A0A024QZK7;B3KXY9;B4DG62;A8K7J7;Q59FD4;P19367;B3KRA9;B1AR63;B1AR61;Q53QX9;Q68E10;E9PB90;A8K2U2;P52789;P78542;B1AR62;B4E0J9;B3KT70;A8K4Q9;Q2TB90	A0A024QZK7;B3KXY9;B4DG62;A8K7J7;Q59FD4;P19367;B3KRA9	17;17;16;16;16;16;13;3;2;2;2;2;2;2;1;1;1;1;1;1	17;17;16;16;16;16;13;3;2;2;2;2;2;2;1;1;1;1;1;1	17;17;16;16;16;16;13;3;2;2;2;2;2;2;1;1;1;1;1;1	Hexokinase-1	HK1	>tr|A0A024QZK7|A0A024QZK7_HUMAN Hexokinase 1, isoform CRA_c OS=Homo sapiens GN=HK1 PE=3 SV=1;>tr|B3KXY9|B3KXY9_HUMAN cDNA FLJ46359 fis, clone TESTI4049786, highly similar to Hexokinase-1 (EC 2.7.1.1) OS=Homo sapiens PE=2 SV=1;>tr|B4DG62|B4DG62_HUMAN cDNA F	20	17	17	17	0	0	0	0	4	5	1	1	5	7	8	7	8	6	2	2	0	0	0	0	0	0	0	0	0	0	4	5	1	1	5	7	8	7	8	6	2	2
B4DSN3;G5EA31;A0A024QZM6;P53992;B7ZAY6;A0A0U1RR49;B4DQ22	B4DSN3;G5EA31;A0A024QZM6;P53992	8;8;8;8;3;1;1	8;8;8;8;3;1;1	6;6;6;6;3;1;0	Protein transport protein Sec24C	SEC24C	>tr|B4DSN3|B4DSN3_HUMAN cDNA FLJ60345, highly similar to Protein transport protein Sec24C OS=Homo sapiens PE=2 SV=1;>tr|G5EA31|G5EA31_HUMAN Protein transport protein Sec24C OS=Homo sapiens GN=SEC24C PE=1 SV=1;>tr|A0A024QZM6|A0A024QZM6_HUMAN SEC24 related g	7	8	8	6	0	1	1	1	4	5	1	0	0	0	0	0	1	1	0	0	2	2	0	0	1	1	0	1	1	1	4	5	1	0	0	0	0	0	1	1	0	0
A0A024QZN4;V9HWK2;P18206;B3KXA2;B4E3Q9;Q5JQ13;B4DKC9;B4DTM7;A0A096LPE1	A0A024QZN4;V9HWK2;P18206;B3KXA2;B4E3Q9;Q5JQ13	29;29;29;26;25;19;9;6;1	29;29;29;26;25;19;9;6;1	29;29;29;26;25;19;9;6;1	Vinculin	VCL;HEL114	>tr|A0A024QZN4|A0A024QZN4_HUMAN Vinculin, isoform CRA_c OS=Homo sapiens GN=VCL PE=4 SV=1;>tr|V9HWK2|V9HWK2_HUMAN Epididymis luminal protein 114 OS=Homo sapiens GN=HEL114 PE=2 SV=1;>sp|P18206|VINC_HUMAN Vinculin OS=Homo sapiens GN=VCL PE=1 SV=4;>tr|B3KXA2|B	9	29	29	29	2	3	5	7	10	10	7	6	6	8	5	5	10	11	8	8	2	4	7	8	9	9	2	3	5	7	10	10	7	6	6	8	5	5	10	11	8	8
A0A024QZN8;Q5GLZ8;A8K9U4;H0Y6K7;D6RCL5;Q9Y4U2	A0A024QZN8;Q5GLZ8;A8K9U4	11;11;10;3;2;1	11;11;10;3;2;1	11;11;10;3;2;1	Probable E3 ubiquitin-protein ligase HERC4	HERC4	>tr|A0A024QZN8|A0A024QZN8_HUMAN Hect domain and RLD 4, isoform CRA_b OS=Homo sapiens GN=HERC4 PE=4 SV=1;>sp|Q5GLZ8|HERC4_HUMAN Probable E3 ubiquitin-protein ligase HERC4 OS=Homo sapiens GN=HERC4 PE=1 SV=1;>tr|A8K9U4|A8K9U4_HUMAN cDNA FLJ77205, highly simil	6	11	11	11	1	1	6	6	4	5	2	2	1	1	0	0	5	6	1	1	3	3	4	4	2	2	1	1	6	6	4	5	2	2	1	1	0	0	5	6	1	1
B4DNS3;B4DNW5;B7Z4X4;B4DNR9;K4N2H0;E3VLD0;B2R7Z9;A0A024QZQ0;A0A024QZP2;Q8IWL2;Q8IWL1;B7Z4Y4;B7Z4Y9;B4DNP6;X6REF7;A0A0C4DG36	B4DNS3;B4DNW5;B7Z4X4;B4DNR9;K4N2H0;E3VLD0;B2R7Z9;A0A024QZQ0;A0A024QZP2;Q8IWL2;Q8IWL1;B7Z4Y4;B7Z4Y9;B4DNP6;X6REF7;A0A0C4DG36	4;4;4;4;4;4;4;4;4;4;4;3;3;3;2;2	4;4;4;4;4;4;4;4;4;4;4;3;3;3;2;2	4;4;4;4;4;4;4;4;4;4;4;3;3;3;2;2	Pulmonary surfactant-associated protein A1;Pulmonary surfactant-associated protein A2	SFTPA1;SFTPA2	>tr|B4DNS3|B4DNS3_HUMAN cDNA FLJ50593, moderately similar to Pulmonary surfactant-associated protein A1 OS=Homo sapiens PE=2 SV=1;>tr|B4DNW5|B4DNW5_HUMAN cDNA FLJ61144, highly similar to Pulmonary surfactant-associated protein A1 OS=Homo sapiens PE=2 SV=1;	16	4	4	4	0	0	1	1	0	0	3	3	0	0	0	0	0	0	0	0	0	0	0	0	0	0	0	0	1	1	0	0	3	3	0	0	0	0	0	0	0	0
B3KPC1;A0A024QZR3;Q9BRX2	B3KPC1;A0A024QZR3;Q9BRX2	2;2;2	2;2;2	2;2;2	Protein pelota homolog	hCG_2002731;PELO	>tr|B3KPC1|B3KPC1_HUMAN Protein pelota homolog OS=Homo sapiens PE=2 SV=1;>tr|A0A024QZR3|A0A024QZR3_HUMAN Protein pelota homolog OS=Homo sapiens GN=hCG_2002731 PE=3 SV=1;>sp|Q9BRX2|PELO_HUMAN Protein pelota homolog OS=Homo sapiens GN=PELO PE=1 SV=2	3	2	2	2	0	0	0	0	0	0	1	1	0	0	0	0	1	1	1	1	0	0	1	0	0	0	0	0	0	0	0	0	1	1	0	0	0	0	1	1	1	1
Q8NDP0;A0A024QZR5;Q9Y2T2;B4DRN6;E5RJ52;P53677;H0YBM0;H0YBA0;E7ER80	Q8NDP0;A0A024QZR5;Q9Y2T2;B4DRN6	7;7;7;6;3;3;2;1;1	7;7;7;6;3;3;2;1;1	7;7;7;6;3;3;2;1;1	AP-3 complex subunit mu-1	DKFZp586G1518;AP3M1	>tr|Q8NDP0|Q8NDP0_HUMAN Putative uncharacterized protein DKFZp586G1518 (Fragment) OS=Homo sapiens GN=DKFZp586G1518 PE=2 SV=1;>tr|A0A024QZR5|A0A024QZR5_HUMAN Adaptor-related protein complex 3, mu 1 subunit, isoform CRA_a OS=Homo sapiens GN=AP3M1 PE=3 SV=1;>	9	7	7	7	0	0	1	1	2	1	2	2	1	1	0	0	2	2	0	0	1	2	2	2	4	3	0	0	1	1	2	1	2	2	1	1	0	0	2	2	0	0
A0A024QZS1;O96007	A0A024QZS1;O96007	2;2	2;2	2;2	Molybdopterin synthase catalytic subunit	MOCS2	>tr|A0A024QZS1|A0A024QZS1_HUMAN Molybdopterin synthase catalytic subunit OS=Homo sapiens GN=MOCS2 PE=3 SV=1;>sp|O96007|MOC2B_HUMAN Molybdopterin synthase catalytic subunit OS=Homo sapiens GN=MOCS2 PE=1 SV=1	2	2	2	2	0	0	0	0	0	0	0	0	1	1	0	0	1	1	0	0	0	0	0	0	0	0	0	0	0	0	0	0	0	0	1	1	0	0	1	1	0	0
A0A024QZS3;O14494;A0A024QZU7	A0A024QZS3;O14494;A0A024QZU7	6;6;5	6;6;5	6;6;5	Lipid phosphate phosphohydrolase 1	PPAP2A	>tr|A0A024QZS3|A0A024QZS3_HUMAN Phosphatidic acid phosphatase type 2A, isoform CRA_a OS=Homo sapiens GN=PPAP2A PE=4 SV=1;>sp|O14494|PLPP1_HUMAN Phospholipid phosphatase 1 OS=Homo sapiens GN=PLPP1 PE=1 SV=1;>tr|A0A024QZU7|A0A024QZU7_HUMAN Phosphatidic acid	3	6	6	6	3	3	3	3	6	6	2	2	5	5	3	3	5	5	5	5	4	4	5	5	6	6	3	3	3	3	6	6	2	2	5	5	3	3	5	5	5	5
A0A024QZT2;Q96KP1;B3KPN7;B4DZI7;Q2MDF5	A0A024QZT2;Q96KP1;B3KPN7	21;21;20;10;2	21;21;20;10;2	21;21;20;10;2	Exocyst complex component 2	EXOC2	>tr|A0A024QZT2|A0A024QZT2_HUMAN Exocyst complex component 2, isoform CRA_a OS=Homo sapiens GN=EXOC2 PE=4 SV=1;>sp|Q96KP1|EXOC2_HUMAN Exocyst complex component 2 OS=Homo sapiens GN=EXOC2 PE=1 SV=1;>tr|B3KPN7|B3KPN7_HUMAN cDNA FLJ32002 fis, clone NT2RP700939	5	21	21	21	2	2	7	8	6	5	0	2	7	6	1	1	7	8	6	7	4	5	9	9	3	2	2	2	7	8	6	5	0	2	7	6	1	1	7	8	6	7
A0A024QZU0;Q13546	A0A024QZU0;Q13546	5;5	5;5	5;5	Receptor-interacting serine/threonine-protein kinase 1	RIPK1	>tr|A0A024QZU0|A0A024QZU0_HUMAN Receptor (TNFRSF)-interacting serine-threonine kinase 1, isoform CRA_a OS=Homo sapiens GN=RIPK1 PE=4 SV=1;>sp|Q13546|RIPK1_HUMAN Receptor-interacting serine/threonine-protein kinase 1 OS=Homo sapiens GN=RIPK1 PE=1 SV=3	2	5	5	5	0	0	1	1	0	1	0	0	0	0	0	0	1	2	2	2	1	0	1	0	2	1	0	0	1	1	0	1	0	0	0	0	0	0	1	2	2	2
A0A024QZU6;P19883;H0YAF9;H0YA75;Q6FHE1	A0A024QZU6;P19883;H0YAF9;H0YA75;Q6FHE1	4;4;3;3;3	4;4;3;3;3	4;4;3;3;3	Follistatin	FST	>tr|A0A024QZU6|A0A024QZU6_HUMAN Follistatin, isoform CRA_c OS=Homo sapiens GN=FST PE=4 SV=1;>sp|P19883|FST_HUMAN Follistatin OS=Homo sapiens GN=FST PE=1 SV=2;>tr|H0YAF9|H0YAF9_HUMAN Follistatin (Fragment) OS=Homo sapiens GN=FST PE=1 SV=1;>tr|H0YA75|H0YA75_	5	4	4	4	0	0	0	0	4	4	0	0	0	0	0	0	0	0	0	0	0	0	0	0	0	0	0	0	0	0	4	4	0	0	0	0	0	0	0	0	0	0
A0A024QZV0;Q86UY0;Q6EHZ3;Q658S9;Q8NBS9	A0A024QZV0;Q86UY0;Q6EHZ3;Q658S9;Q8NBS9	3;3;3;3;3	3;3;3;3;3	3;3;3;3;3	Thioredoxin domain-containing protein 5	hCG_1811539;TXNDC5;STRF8;DKFZp666I134	>tr|A0A024QZV0|A0A024QZV0_HUMAN HCG1811539, isoform CRA_b OS=Homo sapiens GN=hCG_1811539 PE=3 SV=1;>tr|Q86UY0|Q86UY0_HUMAN TXNDC5 protein OS=Homo sapiens GN=TXNDC5 PE=2 SV=1;>tr|Q6EHZ3|Q6EHZ3_HUMAN Putative uncharacterized protein STRF8 OS=Homo sapiens GN=	5	3	3	3	0	0	1	1	0	0	1	1	0	0	0	0	0	0	0	0	1	0	0	0	0	0	0	0	1	1	0	0	1	1	0	0	0	0	0	0	0	0
Q9BS45;A0A024QZW0;P51580;Q6I929	Q9BS45;A0A024QZW0;P51580	11;11;11;3	11;11;11;3	11;11;11;3	Thiopurine S-methyltransferase	TPMT	>tr|Q9BS45|Q9BS45_HUMAN Thiopurine S-methyltransferase OS=Homo sapiens GN=TPMT PE=2 SV=1;>tr|A0A024QZW0|A0A024QZW0_HUMAN Thiopurine S-methyltransferase, isoform CRA_d OS=Homo sapiens GN=TPMT PE=3 SV=1;>sp|P51580|TPMT_HUMAN Thiopurine S-methyltransferase OS	4	11	11	11	1	1	3	3	3	4	2	2	4	3	1	1	3	3	3	2	2	2	2	2	5	6	1	1	3	3	3	4	2	2	4	3	1	1	3	3	3	2
A0A024QZW3;Q96S59;A0A024R014	A0A024QZW3;Q96S59;A0A024R014	2;2;1	2;2;1	2;2;1	Ran-binding protein 9	RANBP9	>tr|A0A024QZW3|A0A024QZW3_HUMAN RAN binding protein 9, isoform CRA_a OS=Homo sapiens GN=RANBP9 PE=4 SV=1;>sp|Q96S59|RANB9_HUMAN Ran-binding protein 9 OS=Homo sapiens GN=RANBP9 PE=1 SV=1;>tr|A0A024R014|A0A024R014_HUMAN RAN binding protein 9, isoform CRA_b O	3	2	2	2	0	0	0	0	2	1	0	0	0	0	0	0	0	0	0	0	0	0	0	0	0	0	0	0	0	0	2	1	0	0	0	0	0	0	0	0	0	0
A0A024QZX3;A0A024QZX5;A0A087X1N8;P35237;Q8IXH2;A0A024QZT8;C9JTJ8;C9JVA8;H7BXK7;A0A1B0GU38;B2R9H3;A0A024R2B1;P50452	A0A024QZX3;A0A024QZX5;A0A087X1N8;P35237;Q8IXH2;A0A024QZT8	18;18;18;18;13;9;1;1;1;1;1;1;1	18;18;18;18;13;9;1;1;1;1;1;1;1	18;18;18;18;13;9;1;1;1;1;1;1;1	Serpin B6	SERPINB6	>tr|A0A024QZX3|A0A024QZX3_HUMAN Serpin peptidase inhibitor, clade B (Ovalbumin), member 6, isoform CRA_a OS=Homo sapiens GN=SERPINB6 PE=3 SV=1;>tr|A0A024QZX5|A0A024QZX5_HUMAN Serpin B6 OS=Homo sapiens GN=SERPINB6 PE=1 SV=1;>tr|A0A087X1N8|A0A087X1N8_HUMAN S	13	18	18	18	6	6	10	10	13	14	9	9	8	8	7	7	14	14	9	10	6	6	9	9	11	10	6	6	10	10	13	14	9	9	8	8	7	7	14	14	9	10
B2R7M3;A0A024QZY1;Q13155;A8MU58;F8W950	B2R7M3;A0A024QZY1;Q13155;A8MU58;F8W950	6;6;6;5;5	6;6;6;5;5	6;6;6;5;5	Aminoacyl tRNA synthase complex-interacting multifunctional protein 2	JTV1;AIMP2	>tr|B2R7M3|B2R7M3_HUMAN cDNA, FLJ93510, highly similar to Homo sapiens JTV1 gene (JTV1), mRNA OS=Homo sapiens PE=2 SV=1;>tr|A0A024QZY1|A0A024QZY1_HUMAN JTV1 gene, isoform CRA_a OS=Homo sapiens GN=JTV1 PE=4 SV=1;>sp|Q13155|AIMP2_HUMAN Aminoacyl tRNA synthas	5	6	6	6	0	0	1	1	3	3	0	0	1	1	0	0	3	3	0	0	0	0	0	0	0	1	0	0	1	1	3	3	0	0	1	1	0	0	3	3	0	0
Q0D2M2;B2R4S9;A0A024RCL8;A0A024RCJ9;A0A024QZZ7;I6L9F7;U3KQK0;B4DR52;Q99879;Q99877;Q93079;Q5QNW6;P62807;P58876;O60814;A8K9J7;P57053;Q99880;L0R4T3	Q0D2M2;B2R4S9;A0A024RCL8;A0A024RCJ9;A0A024QZZ7;I6L9F7;U3KQK0;B4DR52;Q99879;Q99877;Q93079;Q5QNW6;P62807;P58876;O60814;A8K9J7;P57053;Q99880	9;9;9;9;9;9;9;9;9;9;9;9;9;9;9;8;8;6;1	1;1;1;1;1;1;1;1;1;1;1;1;1;1;1;1;1;1;0	1;1;1;1;1;1;1;1;1;1;1;1;1;1;1;1;1;1;0	Histone H2B;Histone H2B type 1-M;Histone H2B type 1-N;Histone H2B type 1-H;Histone H2B type 2-F;Histone H2B type 1-C/E/F/G/I;Histone H2B type 1-D;Histone H2B type 1-K;Histone H2B type F-S;Histone H2B type 1-L	HIST1H2BC;HIST1H2BK;HIST1H2BN;HIST1H2BD;HIST1H2BM;HIST1H2BH;HIST2H2BF;H2BFS;HIST1H2BL	>tr|Q0D2M2|Q0D2M2_HUMAN HIST1H2BC protein OS=Homo sapiens GN=HIST1H2BC PE=2 SV=1;>tr|B2R4S9|B2R4S9_HUMAN Histone H2B OS=Homo sapiens GN=HIST1H2BE PE=2 SV=1;>tr|A0A024RCL8|A0A024RCL8_HUMAN Histone H2B OS=Homo sapiens GN=HIST1H2BK PE=3 SV=1;>tr|A0A024RCJ9|A0	19	9	1	1	4	4	4	4	4	4	1	1	4	4	8	8	3	3	2	2	3	3	3	3	3	3	0	0	1	1	0	0	0	0	0	0	1	1	0	0	0	0
A3KPC7;A0A024RAS2;Q08AJ9;B2R5B3;A4FTV9;A0A024R017;A0A0U1RR32;A0A0U1RRH7;Q99878;Q96KK5;Q9BTM1;Q93077;Q7L7L0;P20671;P0C0S8;P04908;H0YFX9;B4E0B3;B2R5B6;Q16777;Q6FI13;C9J0D1;V9GZN0;C9J386;REV__H0Y672;REV__Q6N028;REV__E7EQ67;REV__Q6ZS45;REV__Q7Z5E6;REV__H7BY63;REV__A0A087X2A7;REV__Q6P9G8;REV__Q8NB25	A3KPC7;A0A024RAS2;Q08AJ9;B2R5B3;A4FTV9;A0A024R017;A0A0U1RR32;A0A0U1RRH7;Q99878;Q96KK5;Q9BTM1;Q93077;Q7L7L0;P20671;P0C0S8;P04908;H0YFX9;B4E0B3;B2R5B6;Q16777;Q6FI13	6;6;6;6;6;6;6;6;6;6;6;6;6;6;6;6;5;5;5;5;5;2;1;1;1;1;1;1;1;1;1;1;1	6;6;6;6;6;6;6;6;6;6;6;6;6;6;6;6;5;5;5;5;5;2;1;1;1;1;1;1;1;1;1;1;1	1;1;1;1;1;1;1;1;1;1;1;1;1;1;1;1;1;1;0;1;1;0;0;0;0;0;0;0;0;0;0;0;0	Histone H2A;Histone H2A type 1-J;Histone H2A type 1-H;Histone H2A.J;Histone H2A type 1-C;Histone H2A type 3;Histone H2A type 1-D;Histone H2A type 1;Histone H2A type 1-B/E;Histone H2A type 2-C;Histone H2A type 2-A	HIST1H2AH;H2AFJ;HIST1H2AB;HIST1H2AK;HIST1H2AC;HIST1H2AJ;HIST3H2A;HIST1H2AD;HIST1H2AG;HIST2H2AC;HIST2H2AA3	>tr|A3KPC7|A3KPC7_HUMAN Histone H2A OS=Homo sapiens GN=HIST1H2AH PE=2 SV=1;>tr|A0A024RAS2|A0A024RAS2_HUMAN Histone H2A OS=Homo sapiens GN=H2AFJ PE=3 SV=1;>tr|Q08AJ9|Q08AJ9_HUMAN Histone H2A OS=Homo sapiens GN=HIST1H2AB PE=2 SV=1;>tr|B2R5B3|B2R5B3_HUMAN His	33	6	6	1	3	3	3	3	5	5	1	1	4	4	3	3	3	3	0	0	1	1	1	1	2	2	3	3	3	3	5	5	1	1	4	4	3	3	3	3	0	0
A0A024R035;P02748	A0A024R035;P02748	9;9	9;9	9;9	Complement component C9;Complement component C9a;Complement component C9b	C9	>tr|A0A024R035|A0A024R035_HUMAN Complement component 9, isoform CRA_a OS=Homo sapiens GN=C9 PE=4 SV=1;>sp|P02748|CO9_HUMAN Complement component C9 OS=Homo sapiens GN=C9 PE=1 SV=2	2	9	9	9	0	0	4	4	2	2	0	0	0	0	2	3	2	1	0	0	1	3	0	0	0	0	0	0	4	4	2	2	0	0	0	0	2	3	2	1	0	0
B2R6K4;A0A024R056;P62873;F6UT28;B1AKQ8;F6X3N5;Q71UM6;B3KVK2;Q71UM7;F5H8J8;F5H0S8;Q59G26;E9PCP0;F1T0G5;F1T0G4;P16520	B2R6K4;A0A024R056;P62873;F6UT28;B1AKQ8;F6X3N5;Q71UM6;B3KVK2	14;14;14;8;7;7;7;7;5;2;2;2;2;2;2;2	8;8;8;4;3;3;5;5;3;0;0;0;0;0;0;0	8;8;8;4;3;3;5;5;3;0;0;0;0;0;0;0	Guanine nucleotide-binding protein G(I)/G(S)/G(T) subunit beta-1	GNB1	>tr|B2R6K4|B2R6K4_HUMAN cDNA, FLJ92996, highly similar to Homo sapiens guanine nucleotide binding protein (G protein), beta polypeptide 1 (GNB1), mRNA OS=Homo sapiens PE=2 SV=1;>tr|A0A024R056|A0A024R056_HUMAN Guanine nucleotide binding protein (G protein),	16	14	8	8	6	6	6	6	13	13	5	5	6	6	4	5	8	8	5	5	8	8	8	8	6	6	1	1	1	1	7	7	4	4	1	1	1	2	2	2	2	2
Q8N995;A0A024R059;Q01581;D6RIW1	Q8N995;A0A024R059;Q01581	13;13;13;3	13;13;13;3	13;13;13;3	Hydroxymethylglutaryl-CoA synthase, cytoplasmic	HMGCS1	>tr|Q8N995|Q8N995_HUMAN cDNA FLJ38173 fis, clone FCBBF1000053, highly similar to HYDROXYMETHYLGLUTARYL-COA SYNTHASE, CYTOPLASMIC OS=Homo sapiens PE=2 SV=1;>tr|A0A024R059|A0A024R059_HUMAN 3-hydroxy-3-methylglutaryl-Coenzyme A synthase 1 (Soluble), isoform C	4	13	13	13	1	1	7	7	5	5	2	1	2	2	1	1	3	3	3	4	2	3	3	4	3	4	1	1	7	7	5	5	2	1	2	2	1	1	3	3	3	4
A0A024R084;Q9BRK5	A0A024R084;Q9BRK5	19;19	19;19	3;3	45 kDa calcium-binding protein	SDF4	>tr|A0A024R084|A0A024R084_HUMAN Stromal cell derived factor 4, isoform CRA_c OS=Homo sapiens GN=SDF4 PE=4 SV=1;>sp|Q9BRK5|CAB45_HUMAN 45 kDa calcium-binding protein OS=Homo sapiens GN=SDF4 PE=1 SV=1	2	19	19	3	11	11	12	12	11	10	7	7	13	13	12	12	9	9	5	5	12	12	10	10	10	10	11	11	12	12	11	10	7	7	13	13	12	12	9	9	5	5
A0A024R094;Q9H074;D6REB4;D6RJF2;D6RJ02;D6RD97;D6R9H8	A0A024R094;Q9H074;D6REB4	8;8;7;3;2;1;1	8;8;7;3;2;1;1	8;8;7;3;2;1;1	Polyadenylate-binding protein-interacting protein 1	PAIP1	>tr|A0A024R094|A0A024R094_HUMAN Poly(A) binding protein interacting protein 1, isoform CRA_a OS=Homo sapiens GN=PAIP1 PE=4 SV=1;>sp|Q9H074|PAIP1_HUMAN Polyadenylate-binding protein-interacting protein 1 OS=Homo sapiens GN=PAIP1 PE=1 SV=1;>tr|D6REB4|D6REB4_	7	8	8	8	0	1	3	3	2	2	2	1	2	2	1	1	1	1	1	1	1	1	1	1	3	4	0	1	3	3	2	2	2	1	2	2	1	1	1	1	1	1
Q2NKW8;A0A024R0A8;V5YQL4;O43865;Q6ZMM9;O43210;Q9BTL0;Q6ZMI1	Q2NKW8;A0A024R0A8;V5YQL4;O43865;Q6ZMM9	13;13;13;13;9;6;5;2	13;13;13;13;9;6;5;2	6;6;6;6;3;2;2;0	Adenosylhomocysteinase;Putative adenosylhomocysteinase 2	AHCYL1;FGFR2-AHCYL1	>tr|Q2NKW8|Q2NKW8_HUMAN Adenosylhomocysteinase (Fragment) OS=Homo sapiens GN=AHCYL1 PE=2 SV=1;>tr|A0A024R0A8|A0A024R0A8_HUMAN Adenosylhomocysteinase OS=Homo sapiens GN=AHCYL1 PE=3 SV=1;>tr|V5YQL4|V5YQL4_HUMAN Adenosylhomocysteinase OS=Homo sapiens GN=FGFR2	8	13	13	6	3	2	5	5	6	8	2	2	5	5	1	2	6	6	6	5	3	4	2	3	6	6	3	2	5	5	6	8	2	2	5	5	1	2	6	6	6	5
A0A024R0A9;H0Y3T6;G3V1E2	A0A024R0A9;H0Y3T6;G3V1E2	17;12;12	1;0;0	1;0;0		SDF4	>tr|A0A024R0A9|A0A024R0A9_HUMAN Stromal cell derived factor 4, isoform CRA_b OS=Homo sapiens GN=SDF4 PE=4 SV=1;>tr|H0Y3T6|H0Y3T6_HUMAN 45 kDa calcium-binding protein (Fragment) OS=Homo sapiens GN=SDF4 PE=1 SV=1;>tr|G3V1E2|G3V1E2_HUMAN 45 kDa calcium-bindin	3	17	1	1	10	9	10	10	10	9	7	7	11	11	11	11	8	8	5	5	9	9	9	9	9	9	1	0	0	0	0	0	0	0	0	0	0	0	0	0	0	0
Q9GZV0;A0A024R0K2;A0A024R0E2;O75534;Q96L66;E9PLT0;Q9UG93;E9PNG3;Q8WU01;Q9UG12;E9PJK7;E9PLD4	Q9GZV0;A0A024R0K2;A0A024R0E2;O75534;Q96L66;E9PLT0	17;17;17;17;16;15;7;4;4;3;1;1	17;17;17;17;16;15;7;4;4;3;1;1	17;17;17;17;16;15;7;4;4;3;1;1	Cold shock domain-containing protein E1	CSDE1;UNR	>tr|Q9GZV0|Q9GZV0_HUMAN cDNA FLJ12454 fis, clone NT2RM1000555, highly similar to UNR PROTEIN OS=Homo sapiens PE=2 SV=1;>tr|A0A024R0K2|A0A024R0K2_HUMAN Cold shock domain containing E1, RNA-binding, isoform CRA_b OS=Homo sapiens GN=CSDE1 PE=4 SV=1;>tr|A0A024	12	17	17	17	0	0	5	5	6	6	6	6	2	3	0	0	7	6	2	3	0	0	2	2	1	2	0	0	5	5	6	6	6	6	2	3	0	0	7	6	2	3
A0A024R0E5;P52907;A8K0T9	A0A024R0E5;P52907;A8K0T9	14;14;13	14;14;13	12;12;11	F-actin-capping protein subunit alpha-1	CAPZA1	>tr|A0A024R0E5|A0A024R0E5_HUMAN Capping protein (Actin filament) muscle Z-line, alpha 1, isoform CRA_a OS=Homo sapiens GN=CAPZA1 PE=3 SV=1;>sp|P52907|CAZA1_HUMAN F-actin-capping protein subunit alpha-1 OS=Homo sapiens GN=CAPZA1 PE=1 SV=3;>tr|A8K0T9|A8K0T9_	3	14	14	12	4	4	6	5	11	11	10	10	6	6	5	5	10	11	6	7	8	9	6	6	8	9	4	4	6	5	11	11	10	10	6	6	5	5	10	11	6	7
A0A024R0G8;A0A087WYM3;Q8IXJ6;B5MCS1;A0A0A0MRF5;E7EWX6;A7VJH3;C9JZQ0;F8WCF4;C9JR33;C9J3U7;F8WF57;F8WDM4	A0A024R0G8;A0A087WYM3;Q8IXJ6;B5MCS1;A0A0A0MRF5;E7EWX6;A7VJH3;C9JZQ0;F8WCF4	6;6;6;5;5;5;5;4;3;2;2;1;1	6;6;6;5;5;5;5;4;3;2;2;1;1	6;6;6;5;5;5;5;4;3;2;2;1;1	NAD-dependent protein deacetylase sirtuin-2	SIRT2;SIR2	>tr|A0A024R0G8|A0A024R0G8_HUMAN Sirtuin (Silent mating type information regulation 2 homolog) 2 (S. cerevisiae), isoform CRA_a OS=Homo sapiens GN=SIRT2 PE=4 SV=1;>tr|A0A087WYM3|A0A087WYM3_HUMAN NAD-dependent protein deacetylase sirtuin-2 OS=Homo sapiens GN	13	6	6	6	0	0	2	2	0	0	1	1	2	1	0	0	3	2	0	0	0	0	2	1	1	1	0	0	2	2	0	0	1	1	2	1	0	0	3	2	0	0
B4DKS0;A0A024R0H1;P53985;B2R6A5;Q5T8R3;Q5T8R5;Q5T8R4	B4DKS0;A0A024R0H1;P53985;B2R6A5;Q5T8R3;Q5T8R5	5;5;5;4;3;3;1	1;1;1;1;0;0;0	1;1;1;1;0;0;0	Monocarboxylate transporter 1	SLC16A1	>tr|B4DKS0|B4DKS0_HUMAN cDNA FLJ53381, highly similar to Monocarboxylate transporter 1 OS=Homo sapiens PE=2 SV=1;>tr|A0A024R0H1|A0A024R0H1_HUMAN Solute carrier family 16 (Monocarboxylic acid transporters), member 1, isoform CRA_b OS=Homo sapiens GN=SLC16A1	7	5	1	1	1	1	2	2	2	2	2	2	2	2	3	3	4	4	3	3	1	1	1	1	2	2	0	0	0	0	0	0	0	0	0	0	1	1	0	0	0	0
A0A024R0H7;Q9BQA1;H0Y711;B4DJP0	A0A024R0H7;Q9BQA1;H0Y711	6;6;4;2	6;6;4;2	6;6;4;2	Methylosome protein 50	WDR77	>tr|A0A024R0H7|A0A024R0H7_HUMAN Testis tissue sperm-binding protein Li 44a OS=Homo sapiens GN=WDR77 PE=2 SV=1;>sp|Q9BQA1|MEP50_HUMAN Methylosome protein 50 OS=Homo sapiens GN=WDR77 PE=1 SV=1;>tr|H0Y711|H0Y711_HUMAN Methylosome protein 50 (Fragment) OS=Homo	4	6	6	6	1	1	2	2	6	6	1	1	0	0	0	0	2	3	1	1	1	1	1	1	1	1	1	1	2	2	6	6	1	1	0	0	0	0	2	3	1	1
Q5JR08;A0A024R0I3;P08134;E9PQH6;Q5JR07;Q5JR05;Q5JR06;E9PN11;E9PLA2	Q5JR08;A0A024R0I3;P08134;E9PQH6	17;17;17;14;8;8;5;5;4	17;17;17;14;8;8;5;5;4	8;8;8;6;0;0;0;0;0	Rho-related GTP-binding protein RhoC	RHOC;hCG_2043376	>tr|Q5JR08|Q5JR08_HUMAN Rho-related GTP-binding protein RhoC (Fragment) OS=Homo sapiens GN=RHOC PE=1 SV=8;>tr|A0A024R0I3|A0A024R0I3_HUMAN HCG2043376, isoform CRA_b OS=Homo sapiens GN=hCG_2043376 PE=4 SV=1;>sp|P08134|RHOC_HUMAN Rho-related GTP-binding prote	9	17	17	8	9	9	11	11	14	14	6	6	11	11	6	5	11	11	7	8	10	10	11	12	10	10	9	9	11	11	14	14	6	6	11	11	6	5	11	11	7	8
A0A024R0L8;A8K724;A0A024R0J1;O96013;B4E3B5;B4DE88;B4DUG0;M0R3G6;M0R2X4;M0R0L9;M0R1R1	A0A024R0L8;A8K724;A0A024R0J1;O96013;B4E3B5;B4DE88	7;7;7;7;5;5;3;2;2;2;1	7;7;7;7;5;5;3;2;2;2;1	7;7;7;7;5;5;3;2;2;2;1	Serine/threonine-protein kinase PAK 4	PAK4	>tr|A0A024R0L8|A0A024R0L8_HUMAN p21(CDKN1A)-activated kinase 4, isoform CRA_c OS=Homo sapiens GN=PAK4 PE=4 SV=1;>tr|A8K724|A8K724_HUMAN cDNA FLJ76899, highly similar to Homo sapiens p21(CDKN1A)-activated kinase 4 (PAK4), mRNA OS=Homo sapiens PE=2 SV=1;>tr|	11	7	7	7	1	0	2	2	1	1	1	1	0	0	0	0	3	3	3	3	0	1	1	1	1	1	1	0	2	2	1	1	1	1	0	0	0	0	3	3	3	3
A0A024R0K8;A0A024R0J7;P61018;M0R0X1	A0A024R0K8;A0A024R0J7;P61018;M0R0X1	2;2;2;1	1;1;1;1	1;1;1;1	Ras-related protein Rab-4B	RAB4B	>tr|A0A024R0K8|A0A024R0K8_HUMAN HCG1995540, isoform CRA_c OS=Homo sapiens GN=hCG_1995540 PE=4 SV=1;>tr|A0A024R0J7|A0A024R0J7_HUMAN HCG1995540, isoform CRA_a OS=Homo sapiens GN=hCG_1995540 PE=4 SV=1;>sp|P61018|RAB4B_HUMAN Ras-related protein Rab-4B OS=Homo	4	2	1	1	0	0	0	0	0	0	0	0	1	1	0	0	0	1	0	0	0	0	0	0	0	0	0	0	0	0	0	0	0	0	1	1	0	0	0	0	0	0
Q68D16;A8MT37;A0A024R0L5;P49840;M0QYV0	Q68D16;A8MT37;A0A024R0L5;P49840;M0QYV0	5;5;5;5;3	5;5;5;5;3	2;2;2;2;2	Glycogen synthase kinase-3 alpha	DKFZp686D0638;GSK3A	>tr|Q68D16|Q68D16_HUMAN Putative uncharacterized protein DKFZp686D0638 (Fragment) OS=Homo sapiens GN=DKFZp686D0638 PE=2 SV=1;>tr|A8MT37|A8MT37_HUMAN Glycogen synthase kinase-3 alpha OS=Homo sapiens GN=GSK3A PE=1 SV=2;>tr|A0A024R0L5|A0A024R0L5_HUMAN Glycoge	5	5	5	2	0	0	1	1	2	3	0	0	0	0	0	0	1	1	0	0	0	0	2	2	2	2	0	0	1	1	2	3	0	0	0	0	0	0	1	1	0	0
A0A024R0L6;Q15102;M0R1K3;M0R389;M0QZT2;M0QXS6;M0R323	A0A024R0L6;Q15102;M0R1K3;M0R389	10;10;7;6;4;3;3	10;10;7;6;4;3;3	10;10;7;6;4;3;3	Platelet-activating factor acetylhydrolase IB subunit gamma	PAFAH1B3	>tr|A0A024R0L6|A0A024R0L6_HUMAN Platelet-activating factor acetylhydrolase, isoform Ib, gamma subunit 29kDa, isoform CRA_a OS=Homo sapiens GN=PAFAH1B3 PE=4 SV=1;>sp|Q15102|PA1B3_HUMAN Platelet-activating factor acetylhydrolase IB subunit gamma OS=Homo sapi	7	10	10	10	4	3	6	6	9	9	2	2	4	4	0	0	4	4	0	0	3	4	3	3	3	3	4	3	6	6	9	9	2	2	4	4	0	0	4	4	0	0
Q71S06;M0QZQ3;C9JY79;A0A024R0N6;Q9H254;Q71VG2;E9PJZ2;Q9UFA1;A4QPE4;B2RMN7;A0A024R674;Q59FP5;P11277;O15020	Q71S06;M0QZQ3;C9JY79;A0A024R0N6;Q9H254	3;3;3;3;3;1;1;1;1;1;1;1;1;1	1;1;1;1;1;0;0;1;0;0;0;0;0;0	1;1;1;1;1;0;0;1;0;0;0;0;0;0	Spectrin beta chain, non-erythrocytic 4	SPTBN4	>tr|Q71S06|Q71S06_HUMAN Beta spectrin IV OS=Homo sapiens PE=2 SV=1;>tr|M0QZQ3|M0QZQ3_HUMAN Spectrin beta chain, non-erythrocytic 4 OS=Homo sapiens GN=SPTBN4 PE=1 SV=1;>tr|C9JY79|C9JY79_HUMAN Non-erythrocytic beta-spectrin 4 OS=Homo sapiens GN=SPTBN4 PE=1 S	14	3	1	1	2	2	1	1	2	2	2	2	2	2	0	0	2	2	2	2	1	1	2	2	2	2	1	1	0	0	1	1	1	1	1	1	0	0	1	1	0	0
A0A024R0P8;P01137;M0R2S0;Q7Z487;Q7Z488;Q49IL8;Q49IK8;B2C8Z3;A0A078BFK3;A0A078BCH8;A0A078BC11;A0A078BBI5;Q86YU2;Q671V1;Q671U8;A0A078BCJ0	A0A024R0P8;P01137	7;7;3;2;2;2;2;2;2;2;2;2;1;1;1;1	7;7;3;2;2;2;2;2;2;2;2;2;1;1;1;1	7;7;3;2;2;2;2;2;2;2;2;2;1;1;1;1	Transforming growth factor beta-1;Latency-associated peptide	TGFB1	>tr|A0A024R0P8|A0A024R0P8_HUMAN Transforming growth factor, beta 1 (Camurati-Engelmann disease), isoform CRA_a OS=Homo sapiens GN=TGFB1 PE=3 SV=1;>sp|P01137|TGFB1_HUMAN Transforming growth factor beta-1 OS=Homo sapiens GN=TGFB1 PE=1 SV=2	16	7	7	7	0	1	4	4	3	3	4	4	1	1	1	2	1	1	1	1	2	1	0	0	2	1	0	1	4	4	3	3	4	4	1	1	1	2	1	1	1	1
B4DEL6;A0A024R0Q4;Q8IV08;M0R2W7;E2QRG1;M0R1F7	B4DEL6;A0A024R0Q4;Q8IV08;M0R2W7;E2QRG1;M0R1F7	2;2;2;1;1;1	2;2;2;1;1;1	2;2;2;1;1;1	Phospholipase D3	PLD3	>tr|B4DEL6|B4DEL6_HUMAN cDNA FLJ59669, highly similar to Homo sapiens phospholipase D family, member 3 (PLD3), transcript variant 1, mRNA OS=Homo sapiens PE=2 SV=1;>tr|A0A024R0Q4|A0A024R0Q4_HUMAN Phospholipase D family, member 3, isoform CRA_b OS=Homo sapi	6	2	2	2	0	0	0	0	1	1	0	0	1	1	0	0	0	0	0	0	0	0	0	0	0	0	0	0	0	0	1	1	0	0	1	1	0	0	0	0	0	0
Q9BPW0;H0YDU8;Q53FR0;A0A024R0Q7;P53041;B4DLP6;B2R6R6;B4DDZ8;A8MU39;Q59F46;B7Z1I1	Q9BPW0;H0YDU8;Q53FR0;A0A024R0Q7;P53041;B4DLP6;B2R6R6;B4DDZ8;A8MU39	11;11;11;11;11;10;10;9;7;2;2	11;11;11;11;11;10;10;9;7;2;2	11;11;11;11;11;10;10;9;7;2;2	Serine/threonine-protein phosphatase;Serine/threonine-protein phosphatase 5	PPP5C	>tr|Q9BPW0|Q9BPW0_HUMAN Serine/threonine-protein phosphatase (Fragment) OS=Homo sapiens GN=PPP5C PE=2 SV=2;>tr|H0YDU8|H0YDU8_HUMAN Serine/threonine-protein phosphatase (Fragment) OS=Homo sapiens GN=PPP5C PE=1 SV=1;>tr|Q53FR0|Q53FR0_HUMAN Serine/threonine-p	11	11	11	11	0	0	4	3	6	8	0	0	2	2	0	0	6	7	2	2	1	1	2	2	4	5	0	0	4	3	6	8	0	0	2	2	0	0	6	7	2	2
A0A024R0R1;M0QZR4;Q92888;M0R2C7;M0QYC1;M0QXV6;Q8NF33	A0A024R0R1;M0QZR4;Q92888;M0R2C7;M0QYC1	4;4;4;2;2;1;1	4;4;4;2;2;1;1	4;4;4;2;2;1;1	Rho guanine nucleotide exchange factor 1	ARHGEF1	>tr|A0A024R0R1|A0A024R0R1_HUMAN Rho guanine nucleotide exchange factor (GEF) 1, isoform CRA_e OS=Homo sapiens GN=ARHGEF1 PE=4 SV=1;>tr|M0QZR4|M0QZR4_HUMAN Rho guanine nucleotide exchange factor 1 OS=Homo sapiens GN=ARHGEF1 PE=1 SV=1;>sp|Q92888|ARHG1_HUMAN	7	4	4	4	0	0	1	1	1	1	0	1	0	0	0	0	0	1	0	0	0	0	1	1	1	0	0	0	1	1	1	1	0	1	0	0	0	0	0	1	0	0
A0A024R0R9;P54920;M0R0Y2;M0R2M1;M0R058;M0R0I4;M0R213;A0A024R0V6;M0R027;B4DGP9;B4DIV0;A0A087WZQ7;Q9H115;M0QZM9;M0QZN5;M0R031	A0A024R0R9;P54920;M0R0Y2;M0R2M1	20;20;15;14;9;8;6;6;5;2;2;2;2;1;1;1	20;20;15;14;9;8;6;6;5;2;2;2;2;1;1;1	20;20;15;14;9;8;6;6;5;2;2;2;2;1;1;1	Alpha-soluble NSF attachment protein	NAPA	>tr|A0A024R0R9|A0A024R0R9_HUMAN N-ethylmaleimide-sensitive factor attachment protein, alpha, isoform CRA_c OS=Homo sapiens GN=NAPA PE=4 SV=1;>sp|P54920|SNAA_HUMAN Alpha-soluble NSF attachment protein OS=Homo sapiens GN=NAPA PE=1 SV=3;>tr|M0R0Y2|M0R0Y2_HUMA	16	20	20	20	11	11	10	10	17	16	8	9	14	14	6	6	14	15	9	9	8	9	14	14	14	13	11	11	10	10	17	16	8	9	14	14	6	6	14	15	9	9
A0A0U5BLD0;A0A024R0T1;Q6UWP2;A0A087WYV4;A0A087X0R1;A0A087WZN3	A0A0U5BLD0;A0A024R0T1;Q6UWP2	3;3;3;1;1;1	3;3;3;1;1;1	3;3;3;1;1;1	Dehydrogenase/reductase SDR family member 11	MGC4172;DHRS11	>tr|A0A0U5BLD0|A0A0U5BLD0_HUMAN Inactive dehydrogenase/reductase isoform OS=Homo sapiens GN=spDHRS11 PE=2 SV=1;>tr|A0A024R0T1|A0A024R0T1_HUMAN Short-chain dehydrogenase/reductase, isoform CRA_b OS=Homo sapiens GN=MGC4172 PE=3 SV=1;>sp|Q6UWP2|DHR11_HUMAN De	6	3	3	3	0	0	0	0	2	2	1	1	0	0	0	0	0	0	2	2	0	0	0	0	0	0	0	0	0	0	2	2	1	1	0	0	0	0	0	0	2	2
A0A024R0T7;Q9BY14	A0A024R0T7;Q9BY14	4;4	4;4	4;4	Testis-expressed sequence 101 protein	TEX101	>tr|A0A024R0T7|A0A024R0T7_HUMAN Testis expressed sequence 101, isoform CRA_a OS=Homo sapiens GN=TEX101 PE=4 SV=1;>sp|Q9BY14|TX101_HUMAN Testis-expressed sequence 101 protein OS=Homo sapiens GN=TEX101 PE=2 SV=2	2	4	4	4	0	0	0	0	2	2	0	0	1	1	2	2	4	4	0	0	0	0	0	0	0	0	0	0	0	0	2	2	0	0	1	1	2	2	4	4	0	0
K7EL76;A0A024R0V3;Q6P597;K7ENJ3;K7ELP9	K7EL76;A0A024R0V3;Q6P597;K7ENJ3	8;8;8;5;3	4;4;4;3;2	4;4;4;3;2	Kinesin light chain 3	KLC3	>tr|K7EL76|K7EL76_HUMAN Kinesin light chain 3 (Fragment) OS=Homo sapiens GN=KLC3 PE=1 SV=8;>tr|A0A024R0V3|A0A024R0V3_HUMAN Kinesin light chain 3, isoform CRA_a OS=Homo sapiens GN=KLC3 PE=4 SV=1;>sp|Q6P597|KLC3_HUMAN Kinesin light chain 3 OS=Homo sapiens GN	5	8	4	4	1	1	2	2	2	2	3	3	1	1	0	1	3	3	2	2	3	3	1	1	7	7	0	0	2	2	0	0	0	0	0	0	0	0	1	1	1	1
A0A0S2Z4N8;A0A024R0V4;P50552;A0A0S2Z4I9;A0A0S2Z4I7;K7ENL7;A0A0S2Z4H6;K7ENR7;K7EM16;K7EQD0;K7EIG8	A0A0S2Z4N8;A0A024R0V4;P50552;A0A0S2Z4I9;A0A0S2Z4I7	9;9;9;8;7;4;4;3;2;1;1	9;9;9;8;7;4;4;3;2;1;1	9;9;9;8;7;4;4;3;2;1;1	Vasodilator-stimulated phosphoprotein	VASP	>tr|A0A0S2Z4N8|A0A0S2Z4N8_HUMAN Vasodilator-stimulated phosphoprotein isoform 2 (Fragment) OS=Homo sapiens GN=VASP PE=2 SV=1;>tr|A0A024R0V4|A0A024R0V4_HUMAN Vasodilator-stimulated phosphoprotein isoform 1 OS=Homo sapiens GN=VASP PE=2 SV=1;>sp|P50552|VASP_H	11	9	9	9	0	0	2	1	1	2	1	0	3	2	3	3	1	2	3	3	1	1	5	4	3	3	0	0	2	1	1	2	1	0	3	2	3	3	1	2	3	3
A0A024R0Y2;B2ZZ90;Q13085;A2NX49;Q59FY4;B4DWK9;Q7Z5W8;O00763;A0A087X0W4;S4R3S7;B4DK31;B4DIG6;B4DIW1;B4DIR2;B4DYJ7;Q4G170;F8W8T8;H0YGH5;B4DYM0;Q59GJ9	A0A024R0Y2;B2ZZ90;Q13085;A2NX49;Q59FY4	8;8;8;6;4;2;2;2;1;1;1;1;1;1;1;1;1;1;1;1	8;8;8;6;4;2;2;2;1;1;1;1;1;1;1;1;1;1;1;1	8;8;8;6;4;2;2;2;1;1;1;1;1;1;1;1;1;1;1;1	Acetyl-CoA carboxylase 1;Biotin carboxylase	hCG_30204;ACACA	>tr|A0A024R0Y2|A0A024R0Y2_HUMAN HCG30204, isoform CRA_a OS=Homo sapiens GN=hCG_30204 PE=4 SV=1;>tr|B2ZZ90|B2ZZ90_HUMAN Acetyl-Coenzyme A carboxylase alpha OS=Homo sapiens GN=ACACA PE=2 SV=1;>sp|Q13085|ACACA_HUMAN Acetyl-CoA carboxylase 1 OS=Homo sapiens GN	20	8	8	8	0	0	1	1	4	4	0	0	1	1	0	0	3	2	0	0	0	0	0	0	1	1	0	0	1	1	4	4	0	0	1	1	0	0	3	2	0	0
A0A024R0Y5;P08237;B4E162;A0A0S2Z4A1;Q96I60;A0A0S2Z4I1;Q7KYX9;A0A0S2Z4A8;P78457;F8VP00;F8W1J8;F8VSF7;Q7Z683;F8VW30;F8VSL1;F8VUB8;F8VYK8;F8VTQ3;F8VZI0;F8VX13;F8VNX2;F8VZQ1	A0A024R0Y5;P08237;B4E162;A0A0S2Z4A1;Q96I60;A0A0S2Z4I1;Q7KYX9	12;12;11;11;10;10;7;5;2;2;1;1;1;1;1;1;1;1;1;1;1;1	9;9;8;8;9;9;7;5;2;2;1;1;1;1;1;1;1;1;1;1;1;1	9;9;8;8;9;9;7;5;2;2;1;1;1;1;1;1;1;1;1;1;1;1	6-phosphofructokinase;ATP-dependent 6-phosphofructokinase, muscle type	PFKM	>tr|A0A024R0Y5|A0A024R0Y5_HUMAN ATP-dependent 6-phosphofructokinase OS=Homo sapiens GN=PFKM PE=2 SV=1;>sp|P08237|PFKAM_HUMAN ATP-dependent 6-phosphofructokinase, muscle type OS=Homo sapiens GN=PFKM PE=1 SV=2;>tr|B4E162|B4E162_HUMAN cDNA FLJ56281, highly si	22	12	9	9	2	2	4	5	11	10	2	2	4	3	1	1	3	3	1	1	3	3	2	3	3	3	2	2	1	2	8	7	2	2	2	1	1	1	2	2	1	1
A0A024R3Q3;A0A024R0Y6;P84077;P61204;F5H423;B4E190;B4DJC8;B4DN70;B4DEB9;F5H0C7;H0YGG7;F5H1V1;F5H6T5;F8WDB3	A0A024R3Q3;A0A024R0Y6;P84077;P61204;F5H423;B4E190;B4DJC8;B4DN70;B4DEB9	10;10;10;10;8;6;6;6;6;4;2;1;1;1	7;7;7;7;5;5;3;4;3;1;2;0;0;0	6;6;6;6;4;4;3;4;2;1;2;0;0;0	ADP-ribosylation factor 1;ADP-ribosylation factor 3	ARF1;ARF3	>tr|A0A024R3Q3|A0A024R3Q3_HUMAN ADP-ribosylation factor 1, isoform CRA_a OS=Homo sapiens GN=ARF1 PE=3 SV=1;>tr|A0A024R0Y6|A0A024R0Y6_HUMAN ADP-ribosylation factor 3, isoform CRA_b OS=Homo sapiens GN=ARF3 PE=3 SV=1;>sp|P84077|ARF1_HUMAN ADP-ribosylation fac	14	10	7	6	5	5	6	6	10	10	5	5	9	9	4	4	9	8	3	3	6	6	6	6	7	8	4	4	5	5	7	7	3	3	6	6	4	4	6	6	3	3
F8VYY9;A0A024R125;P54619;H0YIC9;H0YHF8;F8VPF5;F8VVA3;F8VZX1;F8VSH3;F8VRY2;F8VSL2;B4E094;B7Z6X8;E9PGP6;A0A090N8Q6;Q9UGJ0	F8VYY9;A0A024R125;P54619;H0YIC9	10;10;10;5;4;3;3;3;1;1;1;1;1;1;1;1	10;10;10;5;4;3;3;3;1;1;1;1;1;1;1;1	10;10;10;5;4;3;3;3;1;1;1;1;1;1;1;1	5-AMP-activated protein kinase subunit gamma-1	PRKAG1	>tr|F8VYY9|F8VYY9_HUMAN 5-AMP-activated protein kinase subunit gamma-1 OS=Homo sapiens GN=PRKAG1 PE=1 SV=1;>tr|A0A024R125|A0A024R125_HUMAN Protein kinase, AMP-activated, gamma 1 non-catalytic subunit, isoform CRA_a OS=Homo sapiens GN=PRKAG1 PE=4 SV=1;>sp|	16	10	10	10	1	1	5	5	4	4	1	1	1	1	0	1	4	4	0	0	1	2	2	3	3	3	1	1	5	5	4	4	1	1	1	1	0	1	4	4	0	0
B3KRK1;A0A024R127;Q86SJ2	B3KRK1;A0A024R127;Q86SJ2	2;2;2	2;2;2	2;2;2	Amphoterin-induced protein 2	AMIGO2	>tr|B3KRK1|B3KRK1_HUMAN cDNA FLJ34442 fis, clone HLUNG2001507, highly similar to Amphoterin-induced protein 2 OS=Homo sapiens PE=2 SV=1;>tr|A0A024R127|A0A024R127_HUMAN Adhesion molecule with Ig-like domain 2, isoform CRA_a OS=Homo sapiens GN=AMIGO2 PE=4 SV	3	2	2	2	0	0	0	0	2	2	0	0	0	0	0	0	0	0	0	0	0	0	0	0	0	0	0	0	0	0	2	2	0	0	0	0	0	0	0	0	0	0
B2R717;A0A024R141;O60911;H7CEH5;Q5QP40;Q6FHN2;Q5NE16;P43235	B2R717;A0A024R141;O60911	3;3;3;1;1;1;1;1	2;2;2;0;0;0;0;0	2;2;2;0;0;0;0;0	Cathepsin L2	CTSL2;CTSV	>tr|B2R717|B2R717_HUMAN cDNA, FLJ93235, highly similar to Homo sapiens cathepsin L2 (CTSL2), mRNA OS=Homo sapiens PE=2 SV=1;>tr|A0A024R141|A0A024R141_HUMAN Cathepsin L2, isoform CRA_a OS=Homo sapiens GN=CTSL2 PE=3 SV=1;>sp|O60911|CATL2_HUMAN Cathepsin L2 O	8	3	2	2	1	1	1	1	0	0	0	0	2	2	0	0	1	1	0	0	1	1	0	0	0	0	0	0	0	0	0	0	0	0	2	2	0	0	0	0	0	0
A0A024R151;Q8WWI5;B3KWF2;B3KMS7	A0A024R151;Q8WWI5	8;8;1;1	8;8;1;1	8;8;1;1	Choline transporter-like protein 1	SLC44A1	>tr|A0A024R151|A0A024R151_HUMAN Solute carrier family 44, member 1, isoform CRA_a OS=Homo sapiens GN=SLC44A1 PE=3 SV=1;>sp|Q8WWI5|CTL1_HUMAN Choline transporter-like protein 1 OS=Homo sapiens GN=SLC44A1 PE=1 SV=1	4	8	8	8	3	3	2	1	6	5	0	1	1	1	1	2	3	3	0	0	1	1	0	0	1	1	3	3	2	1	6	5	0	1	1	1	1	2	3	3	0	0
A0A024R156;P50151;D3DQV2;A0A024R161	A0A024R156;P50151;D3DQV2;A0A024R161	3;3;2;2	3;3;2;2	3;3;2;2	Guanine nucleotide-binding protein subunit gamma;Guanine nucleotide-binding protein G(I)/G(S)/G(O) subunit gamma-10	hCG_1994888;GNG10;hCG_1992840	>tr|A0A024R156|A0A024R156_HUMAN Guanine nucleotide-binding protein subunit gamma OS=Homo sapiens GN=hCG_1994888 PE=3 SV=1;>sp|P50151|GBG10_HUMAN Guanine nucleotide-binding protein G(I)/G(S)/G(O) subunit gamma-10 OS=Homo sapiens GN=GNG10 PE=1 SV=1;>tr|D3DQV	4	3	3	3	1	1	1	0	2	2	1	1	0	0	0	0	1	0	1	1	0	0	1	2	0	0	1	1	1	0	2	2	1	1	0	0	0	0	1	0	1	1
A0A024R172	A0A024R172	15	15	1		LTB4DH	>tr|A0A024R172|A0A024R172_HUMAN Leukotriene B4 12-hydroxydehydrogenase, isoform CRA_a OS=Homo sapiens GN=LTB4DH PE=4 SV=1	1	15	15	1	8	8	7	8	14	14	11	11	6	7	5	5	9	9	7	7	8	8	9	9	8	7	8	8	7	8	14	14	11	11	6	7	5	5	9	9	7	7
A0A024R178;Q96II5;P10398;A0A0S2Z3F2;B4DV85;Q59HC8;B4DMG5	A0A024R178;Q96II5;P10398;A0A0S2Z3F2;B4DV85	9;9;9;8;7;2;2	9;9;9;8;7;2;2	6;6;6;6;4;2;2	Serine/threonine-protein kinase A-Raf	ARAF	>tr|A0A024R178|A0A024R178_HUMAN V-raf murine sarcoma 3611 viral oncogene homolog, isoform CRA_b OS=Homo sapiens GN=ARAF PE=2 SV=1;>tr|Q96II5|Q96II5_HUMAN ARAF protein OS=Homo sapiens GN=ARAF PE=1 SV=1;>sp|P10398|ARAF_HUMAN Serine/threonine-protein kinase A	7	9	9	6	1	1	4	4	4	4	1	0	2	2	1	0	3	3	3	3	1	1	3	3	4	4	1	1	4	4	4	4	1	0	2	2	1	0	3	3	3	3
E5RGN0;Q96GA5;Q9BRL4;A0A087WZU2;F5H6Z0;B4DGP5;A0A140VK97;A0A024R183;A0A024RBH0;B7Z8T0;Q00536;Q00537;H0YBX5;E5RJM2;B7Z461;Q6ZMU4;Q59FJ5	E5RGN0;Q96GA5;Q9BRL4;A0A087WZU2;F5H6Z0;B4DGP5;A0A140VK97;A0A024R183;A0A024RBH0;B7Z8T0;Q00536;Q00537;H0YBX5;E5RJM2;B7Z461;Q6ZMU4;Q59FJ5	2;2;2;2;2;2;2;2;2;2;2;2;1;1;1;1;1	1;1;1;1;1;1;1;1;1;1;1;1;1;1;1;1;1	1;1;1;1;1;1;1;1;1;1;1;1;1;1;1;1;1	Cyclin-dependent kinase 16;Cyclin-dependent kinase 17	CDK16;PCTK1;CDK17;PCTK2	>tr|E5RGN0|E5RGN0_HUMAN Cyclin-dependent kinase 16 (Fragment) OS=Homo sapiens GN=CDK16 PE=1 SV=1;>tr|Q96GA5|Q96GA5_HUMAN PCTK1 protein (Fragment) OS=Homo sapiens GN=PCTK1 PE=2 SV=2;>tr|Q9BRL4|Q9BRL4_HUMAN PCTK1 protein OS=Homo sapiens GN=PCTK1 PE=2 SV=1;>t	17	2	1	1	0	0	1	1	1	1	0	0	1	1	0	0	1	1	0	0	0	1	0	1	0	0	0	0	0	0	0	0	0	0	0	0	0	0	0	0	0	0
A0A024R1A3;P22314;B4DDE4;B4DL67;Q5JRR6;B3KUJ2;Q5JRR9;Q5JRS0;Q5JRS2;Q5JRS1;Q5JRS3;Q8WY81;Q712V1	A0A024R1A3;P22314;B4DDE4;B4DL67	46;46;27;26;16;16;8;8;6;5;5;4;1	46;46;27;26;16;16;8;8;6;5;5;4;1	46;46;27;26;16;16;8;8;6;5;5;4;1	Ubiquitin-like modifier-activating enzyme 1	UBE1;UBA1	>tr|A0A024R1A3|A0A024R1A3_HUMAN Testicular secretory protein Li 63 OS=Homo sapiens GN=UBE1 PE=2 SV=1;>sp|P22314|UBA1_HUMAN Ubiquitin-like modifier-activating enzyme 1 OS=Homo sapiens GN=UBA1 PE=1 SV=3;>tr|B4DDE4|B4DDE4_HUMAN cDNA FLJ54582, highly similar t	13	46	46	46	17	17	26	27	29	29	24	21	22	23	11	13	25	26	18	18	18	19	22	21	23	23	17	17	26	27	29	29	24	21	22	23	11	13	25	26	18	18
A0A024R1A4;P68036;A8K4W8;A0A1B0GUS4	A0A024R1A4;P68036;A8K4W8	7;7;6;3	3;3;2;1	3;3;2;1	Ubiquitin-conjugating enzyme E2 L3	UBE2L3	>tr|A0A024R1A4|A0A024R1A4_HUMAN Ubiquitin-conjugating enzyme E2L 3, isoform CRA_a OS=Homo sapiens GN=UBE2L3 PE=3 SV=1;>sp|P68036|UB2L3_HUMAN Ubiquitin-conjugating enzyme E2 L3 OS=Homo sapiens GN=UBE2L3 PE=1 SV=1;>tr|A8K4W8|A8K4W8_HUMAN cDNA FLJ77917, highl	4	7	3	3	3	2	5	5	3	2	2	2	2	3	2	2	5	5	3	3	2	4	3	3	4	3	0	0	1	1	1	0	0	0	0	0	1	1	2	2	1	1
B0QYF8;A0A024R1G3;P02144;F2Z2F1;B4DUI1;U6FIU7;F2Z337;Q8WVH6;B2RA67;U6FM64;U6FIV2;B0QYF7	B0QYF8;A0A024R1G3;P02144;F2Z2F1;B4DUI1;U6FIU7;F2Z337;Q8WVH6;B2RA67	4;4;4;3;3;2;2;2;2;1;1;1	4;4;4;3;3;2;2;2;2;1;1;1	4;4;4;3;3;2;2;2;2;1;1;1	Myoglobin	MB	>tr|B0QYF8|B0QYF8_HUMAN Myoglobin (Fragment) OS=Homo sapiens GN=MB PE=1 SV=1;>tr|A0A024R1G3|A0A024R1G3_HUMAN Myoglobin OS=Homo sapiens GN=MB PE=3 SV=1;>sp|P02144|MYG_HUMAN Myoglobin OS=Homo sapiens GN=MB PE=1 SV=2;>tr|F2Z2F1|F2Z2F1_HUMAN Myoglobin (Fragmen	12	4	4	4	3	2	2	2	1	1	2	2	1	1	0	0	3	2	2	2	1	1	2	2	3	3	3	2	2	2	1	1	2	2	1	1	0	0	3	2	2	2
B7Z976;A0A024R1G9;O60704;B1AHJ7;B1AHJ6;B1AHJ5	B7Z976;A0A024R1G9;O60704	3;3;3;1;1;1	3;3;3;1;1;1	3;3;3;1;1;1	Protein-tyrosine sulfotransferase 2	TPST2	>tr|B7Z976|B7Z976_HUMAN cDNA FLJ54247, highly similar to Protein-tyrosine sulfotransferase 2 (EC 2.8.2.20) OS=Homo sapiens PE=2 SV=1;>tr|A0A024R1G9|A0A024R1G9_HUMAN Tyrosylprotein sulfotransferase 2, isoform CRA_a OS=Homo sapiens GN=TPST2 PE=4 SV=1;>sp|O60	6	3	3	3	0	1	2	2	0	0	0	0	1	1	2	2	0	0	0	0	1	1	0	0	0	0	0	1	2	2	0	0	0	0	1	1	2	2	0	0	0	0
A0A024R1I0;A0A024R1J9;A0A024R1J8;B7Z4B6;P35240;A0A024R1D9;A0A024R1F6	A0A024R1I0;A0A024R1J9;A0A024R1J8;B7Z4B6;P35240;A0A024R1D9;A0A024R1F6	3;3;3;3;3;2;2	3;3;3;3;3;2;2	3;3;3;3;3;2;2	Merlin	NF2	>tr|A0A024R1I0|A0A024R1I0_HUMAN Neurofibromin 2 (Bilateral acoustic neuroma), isoform CRA_g OS=Homo sapiens GN=NF2 PE=4 SV=1;>tr|A0A024R1J9|A0A024R1J9_HUMAN Neurofibromin 2 (Bilateral acoustic neuroma), isoform CRA_e OS=Homo sapiens GN=NF2 PE=4 SV=1;>tr|A0	7	3	3	3	0	0	0	0	2	2	1	1	0	0	0	0	0	0	1	1	0	0	1	1	0	0	0	0	0	0	2	2	1	1	0	0	0	0	0	0	1	1
A0A024R1I5;O76054;B2RAW8;B3KRD8;B7Z3Z8;H7C417;C9JZI9;F8WEE7;H7C4C6;C9JYY7;C9JTM4;H7C1K3;Q6XCI7;Q6ISB2;Q9UDX4;B4DNV5;Q495V9;B5MC44;B3KYA6;F8WED8;H7C1Y0	A0A024R1I5;O76054;B2RAW8;B3KRD8;B7Z3Z8	22;22;21;18;18;10;9;4;3;3;3;3;3;3;3;2;2;2;2;1;1	22;22;21;18;18;10;9;4;3;3;3;3;3;3;3;2;2;2;2;1;1	22;22;21;18;18;10;9;4;3;3;3;3;3;3;3;2;2;2;2;1;1	SEC14-like protein 2	SEC14L2	>tr|A0A024R1I5|A0A024R1I5_HUMAN SEC14-like 2 (S. cerevisiae), isoform CRA_b OS=Homo sapiens GN=SEC14L2 PE=4 SV=1;>sp|O76054|S14L2_HUMAN SEC14-like protein 2 OS=Homo sapiens GN=SEC14L2 PE=1 SV=1;>tr|B2RAW8|B2RAW8_HUMAN cDNA, FLJ95164, highly similar to Homo	21	22	22	22	5	5	10	10	13	14	7	7	6	6	3	3	11	12	6	8	10	12	11	12	10	9	5	5	10	10	13	14	7	7	6	6	3	3	11	12	6	8
Q53HE0;B3KM22;A0A024R1J5;Q9NRD5;A0A024R1R7;F6V107;F6V3V1;F6VY12;B4DSC9;F6TII1;H7C3Z6;C9J840;E7EX83;Q5MD60;A0A0D9SG62;H7C0P6;E7ENQ1;G3XAA2;H7C360;V9HWH3;G5E948;B7Z3V5;Q53TX8;E7EN19;E7ESS2;B7Z388;A0A0D9SEY1;O95819	Q53HE0;B3KM22;A0A024R1J5;Q9NRD5;A0A024R1R7;F6V107	10;10;10;10;7;5;2;2;2;1;1;1;1;1;1;1;1;1;1;1;1;1;1;1;1;1;1;1	10;10;10;10;7;5;2;2;2;1;1;1;1;1;1;1;1;1;1;1;1;1;1;1;1;1;1;1	10;10;10;10;7;5;2;2;2;1;1;1;1;1;1;1;1;1;1;1;1;1;1;1;1;1;1;1	PRKCA-binding protein	PICK1	>tr|Q53HE0|Q53HE0_HUMAN Protein kinase C, alpha binding protein variant (Fragment) OS=Homo sapiens PE=2 SV=1;>tr|B3KM22|B3KM22_HUMAN cDNA FLJ10013 fis, clone HEMBA1000369, highly similar to PRKCA-binding protein (Protein kinase C-alpha-binding protein) OS=	28	10	10	10	0	0	2	2	6	5	1	1	1	1	0	0	2	2	1	1	1	1	1	0	0	1	0	0	2	2	6	5	1	1	1	1	0	0	2	2	1	1
A0A024R1K7;Q04917;B2R6N6;Q9H4N8;A2IDB2;F8WEB6;A2IDB1	A0A024R1K7;Q04917;B2R6N6;Q9H4N8;A2IDB2	15;15;13;9;8;4;4	11;11;9;7;6;3;3	11;11;9;7;6;3;3	14-3-3 protein eta	YWHAH	>tr|A0A024R1K7|A0A024R1K7_HUMAN Tyrosine 3-monooxygenase/tryptophan 5-monooxygenase activation protein, eta polypeptide, isoform CRA_b OS=Homo sapiens GN=YWHAH PE=3 SV=1;>sp|Q04917|1433F_HUMAN 14-3-3 protein eta OS=Homo sapiens GN=YWHAH PE=1 SV=4;>tr|B2R6N	7	15	11	11	8	7	10	10	11	10	8	8	5	6	6	6	10	10	6	6	7	7	8	8	10	10	5	4	6	6	8	7	6	6	2	3	5	5	6	6	5	5
A0A024R1N1;P35579;A0A0U4BW16;Q86XU5;B4E3S1;Q6ZNL4;A0A024QZJ6;A0A024QZJ4;B1PS43;P35749;Q5BKV1;Q99529;B1AH99;Q7Z7R0;Q2PS10;O14729;O14794;Q68D89;Q9UMJ0;Q66K75;A8CLL2;B4DFX9;B4DRV3;B4E0I9;REV__Q08AF3;REV__B4E0B1;REV__B4DQZ7;REV__S4R3H4;REV__E7EQT4;REV__Q9UKV3;Q9UKX3;P11055	A0A024R1N1;P35579;A0A0U4BW16;Q86XU5	131;131;116;83;53;36;18;18;18;18;11;9;6;6;5;4;4;3;2;2;1;1;1;1;1;1;1;1;1;1;1;1	131;131;116;83;53;36;18;18;18;18;11;9;6;6;5;4;4;3;2;2;1;1;1;1;1;1;1;1;1;1;1;1	109;109;95;66;38;35;8;8;8;8;9;8;5;2;3;0;0;0;2;0;0;0;0;0;0;0;1;1;1;1;0;0	Myosin-9	MYH9	>tr|A0A024R1N1|A0A024R1N1_HUMAN Myosin, heavy polypeptide 9, non-muscle, isoform CRA_a OS=Homo sapiens GN=MYH9 PE=3 SV=1;>sp|P35579|MYH9_HUMAN Myosin-9 OS=Homo sapiens GN=MYH9 PE=1 SV=4;>tr|A0A0U4BW16|A0A0U4BW16_HUMAN Non-muscle myosin heavy chain 9 OS=Hom	32	131	131	109	45	47	60	64	71	74	54	55	52	56	28	29	69	67	57	57	51	49	53	49	51	52	45	47	60	64	71	74	54	55	52	56	28	29	69	67	57	57
B4DE32;B1AHC9;B2RDN9;A0A024R1N4;P12956;Q6IC76;B4E356	B4DE32;B1AHC9;B2RDN9;A0A024R1N4;P12956;Q6IC76;B4E356	2;2;2;2;2;1;1	2;2;2;2;2;1;1	2;2;2;2;2;1;1	X-ray repair cross-complementing protein 6	XRCC6;G22P1	>tr|B4DE32|B4DE32_HUMAN cDNA FLJ53970, highly similar to ATP-dependent DNA helicase 2 subunit 1 (EC3.6.1.-) OS=Homo sapiens PE=2 SV=1;>tr|B1AHC9|B1AHC9_HUMAN X-ray repair cross-complementing protein 6 OS=Homo sapiens GN=XRCC6 PE=1 SV=1;>tr|B2RDN9|B2RDN9_HU	7	2	2	2	0	0	0	0	2	0	0	0	0	0	0	0	0	0	0	0	0	0	0	0	0	0	0	0	0	0	2	0	0	0	0	0	0	0	0	0	0	0
A0A024R1P2;P15153;B1AH77;B1AH78;B1AH80	A0A024R1P2;P15153;B1AH77;B1AH78;B1AH80	6;6;5;5;5	1;1;1;1;1	1;1;1;1;1	Ras-related C3 botulinum toxin substrate 2	RAC2	>tr|A0A024R1P2|A0A024R1P2_HUMAN Ras-related C3 botulinum toxin substrate 2 (Rho family, small GTP binding protein Rac2), isoform CRA_a OS=Homo sapiens GN=RAC2 PE=4 SV=1;>sp|P15153|RAC2_HUMAN Ras-related C3 botulinum toxin substrate 2 OS=Homo sapiens GN=RAC	5	6	1	1	4	4	4	4	5	5	3	3	2	2	4	4	3	3	3	3	2	2	4	4	4	4	0	0	0	0	0	0	0	0	0	0	1	1	0	0	0	0
A0A024R1Q5;P17050	A0A024R1Q5;P17050	9;9	9;9	9;9	Alpha-N-acetylgalactosaminidase	NAGA	>tr|A0A024R1Q5|A0A024R1Q5_HUMAN N-acetylgalactosaminidase, alpha-, isoform CRA_a OS=Homo sapiens GN=NAGA PE=3 SV=1;>sp|P17050|NAGAB_HUMAN Alpha-N-acetylgalactosaminidase OS=Homo sapiens GN=NAGA PE=1 SV=2	2	9	9	9	5	3	4	3	4	4	3	3	5	5	1	1	5	5	1	1	5	5	4	5	2	2	5	3	4	3	4	4	3	3	5	5	1	1	5	5	1	1
Q9BTQ7;A0A024R1Q8;P62829;C9JD32;J3KT29;B9ZVP7;J3KTJ3;J3QQT9	Q9BTQ7;A0A024R1Q8;P62829;C9JD32;J3KT29;B9ZVP7	5;5;5;4;4;3;2;1	5;5;5;4;4;3;2;1	5;5;5;4;4;3;2;1	60S ribosomal protein L23	RPL23	>tr|Q9BTQ7|Q9BTQ7_HUMAN Similar to ribosomal protein L23 (Fragment) OS=Homo sapiens PE=2 SV=1;>tr|A0A024R1Q8|A0A024R1Q8_HUMAN Ribosomal protein L23, isoform CRA_b OS=Homo sapiens GN=RPL23 PE=3 SV=1;>sp|P62829|RL23_HUMAN 60S ribosomal protein L23 OS=Homo sa	8	5	5	5	0	0	1	1	0	0	3	2	0	0	0	0	0	0	0	0	1	1	0	0	0	0	0	0	1	1	0	0	3	2	0	0	0	0	0	0	0	0
A0A024R1S5;O00178;B2RDW9;B0QY59;F5H716	A0A024R1S5;O00178;B2RDW9;B0QY59	4;4;3;2;1	4;4;3;2;1	4;4;3;2;1	GTP-binding protein 1	GTPBP1	>tr|A0A024R1S5|A0A024R1S5_HUMAN GTP binding protein 1, isoform CRA_c OS=Homo sapiens GN=GTPBP1 PE=4 SV=1;>sp|O00178|GTPB1_HUMAN GTP-binding protein 1 OS=Homo sapiens GN=GTPBP1 PE=1 SV=3;>tr|B2RDW9|B2RDW9_HUMAN cDNA, FLJ96803, highly similar to Homo sapiens	5	4	4	4	0	0	1	1	1	1	0	0	0	0	0	0	1	1	0	0	1	1	1	1	2	2	0	0	1	1	1	1	0	0	0	0	0	0	1	1	0	0
A0A024R1S8;Q14847;B4DIC4;B4DJI4;A8K1D2;F6S2S5;C9J9W2;K7ESD6	A0A024R1S8;Q14847;B4DIC4;B4DJI4;A8K1D2;F6S2S5;C9J9W2	6;6;5;5;5;3;3;2	6;6;5;5;5;3;3;2	6;6;5;5;5;3;3;2	LIM and SH3 domain protein 1	LASP1	>tr|A0A024R1S8|A0A024R1S8_HUMAN LIM and SH3 protein 1, isoform CRA_b OS=Homo sapiens GN=LASP1 PE=4 SV=1;>sp|Q14847|LASP1_HUMAN LIM and SH3 domain protein 1 OS=Homo sapiens GN=LASP1 PE=1 SV=2;>tr|B4DIC4|B4DIC4_HUMAN cDNA FLJ52195, highly similar to LIM and	8	6	6	6	0	0	1	2	2	2	0	1	0	0	0	0	3	3	0	0	0	0	1	1	2	2	0	0	1	2	2	2	0	1	0	0	0	0	3	3	0	0
A0A024R1T5;P09543;B4DI06;K7ERC4;C9K0L8;K7ERZ0;K7EN66	A0A024R1T5;P09543;B4DI06	32;32;17;14;12;12;9	32;32;17;14;12;12;9	18;18;4;14;12;12;9	2,3-cyclic-nucleotide 3-phosphodiesterase	CNP	>tr|A0A024R1T5|A0A024R1T5_HUMAN 2,3-cyclic-nucleotide 3-phosphodiesterase OS=Homo sapiens GN=CNP PE=3 SV=1;>sp|P09543|CN37_HUMAN 2,3-cyclic-nucleotide 3-phosphodiesterase OS=Homo sapiens GN=CNP PE=1 SV=2;>tr|B4DI06|B4DI06_HUMAN cDNA FLJ52954, highly	7	32	32	18	14	15	16	14	21	22	9	10	13	13	4	6	16	15	6	7	14	15	20	20	19	21	14	15	16	14	21	22	9	10	13	13	4	6	16	15	6	7
A0A024R1T9;Q4LE36;P53396;A0A024R1Y2;Q8N9C4;K7ESG8;K7EIE7	A0A024R1T9;Q4LE36;P53396;A0A024R1Y2;Q8N9C4	58;58;58;57;35;7;4	58;58;58;57;35;7;4	58;58;58;57;35;7;4	ATP-citrate synthase	ACLY;ACLY variant protein	>tr|A0A024R1T9|A0A024R1T9_HUMAN ATP-citrate synthase OS=Homo sapiens GN=ACLY PE=3 SV=1;>tr|Q4LE36|Q4LE36_HUMAN ACLY variant protein (Fragment) OS=Homo sapiens GN=ACLY variant protein PE=2 SV=1;>sp|P53396|ACLY_HUMAN ATP-citrate synthase OS=Homo sapiens GN=A	7	58	58	58	26	28	27	29	34	36	16	16	32	31	10	10	36	37	19	21	29	29	27	27	30	28	26	28	27	29	34	36	16	16	32	31	10	10	36	37	19	21
A0A024R1U0;P46060;H0Y4Q3;B4DY16	A0A024R1U0;P46060;H0Y4Q3;B4DY16	2;2;1;1	2;2;1;1	2;2;1;1	Ran GTPase-activating protein 1	RANGAP1	>tr|A0A024R1U0|A0A024R1U0_HUMAN Ran GTPase activating protein 1, isoform CRA_d OS=Homo sapiens GN=RANGAP1 PE=4 SV=1;>sp|P46060|RAGP1_HUMAN Ran GTPase-activating protein 1 OS=Homo sapiens GN=RANGAP1 PE=1 SV=1;>tr|H0Y4Q3|H0Y4Q3_HUMAN Ran GTPase-activating pr	4	2	2	2	0	0	0	0	0	0	0	0	1	1	0	0	0	0	0	0	0	0	0	0	0	1	0	0	0	0	0	0	0	0	1	1	0	0	0	0	0	0
A0A024R1U4;P51148;K7ERI8;K7ERQ8;F8VVK3;F8VSF8;K7ENY4;K7EIP6;A0A1B0GWA9;A0A1B0GVC3;K7EN06;O95057;Q96HU8	A0A024R1U4;P51148;K7ERI8;K7ERQ8;F8VVK3	11;11;7;7;6;4;4;1;1;1;1;1;1	11;11;7;7;6;4;4;1;1;1;1;1;1	5;5;1;1;0;0;2;1;0;0;0;0;0	Ras-related protein Rab-5C	RAB5C	>tr|A0A024R1U4|A0A024R1U4_HUMAN RAB5C, member RAS oncogene family, isoform CRA_a OS=Homo sapiens GN=RAB5C PE=4 SV=1;>sp|P51148|RAB5C_HUMAN Ras-related protein Rab-5C OS=Homo sapiens GN=RAB5C PE=1 SV=2;>tr|K7ERI8|K7ERI8_HUMAN Uncharacterized protein OS=Homo	13	11	11	5	6	6	9	9	9	10	3	3	8	7	5	5	7	7	7	7	5	6	8	8	7	7	6	6	9	9	9	10	3	3	8	7	5	5	7	7	7	7
A0A024R1U8;P22692	A0A024R1U8;P22692	7;7	7;7	7;7	Insulin-like growth factor-binding protein 4	IGFBP4	>tr|A0A024R1U8|A0A024R1U8_HUMAN Insulin-like growth factor binding protein 4, isoform CRA_a OS=Homo sapiens GN=IGFBP4 PE=4 SV=1;>sp|P22692|IBP4_HUMAN Insulin-like growth factor-binding protein 4 OS=Homo sapiens GN=IGFBP4 PE=1 SV=2	2	7	7	7	4	4	4	5	4	3	2	2	6	6	3	3	3	3	1	1	4	4	4	4	5	4	4	4	4	5	4	3	2	2	6	6	3	3	3	3	1	1
E4W6B6;B2R4D8;A0A024R1V4;P61353;K7EQQ9;K7ELC7;K7ERY7;Q6LCU2	E4W6B6;B2R4D8;A0A024R1V4;P61353;K7EQQ9;K7ELC7	3;3;3;3;2;2;1;1	3;3;3;3;2;2;1;1	3;3;3;3;2;2;1;1	60S ribosomal protein L27	RPL27	>tr|E4W6B6|E4W6B6_HUMAN RPL27/NME2 fusion protein (Fragment) OS=Homo sapiens GN=RPL27 PE=2 SV=1;>tr|B2R4D8|B2R4D8_HUMAN 60S ribosomal protein L27 OS=Homo sapiens PE=2 SV=1;>tr|A0A024R1V4|A0A024R1V4_HUMAN 60S ribosomal protein L27 OS=Homo sapiens GN=RPL27 P	8	3	3	3	2	2	1	1	3	3	0	0	3	2	1	1	1	1	1	0	1	2	0	0	0	0	2	2	1	1	3	3	0	0	3	2	1	1	1	1	1	0
A0A024R1X3;Q9BRG1;K7ENE3;K7EKV4;K7EP45	A0A024R1X3;Q9BRG1;K7ENE3;K7EKV4	8;8;5;4;1	8;8;5;4;1	8;8;5;4;1	Vacuolar protein-sorting-associated protein 25	VPS25	>tr|A0A024R1X3|A0A024R1X3_HUMAN Vacuolar protein sorting 25 (Yeast), isoform CRA_a OS=Homo sapiens GN=VPS25 PE=4 SV=1;>sp|Q9BRG1|VPS25_HUMAN Vacuolar protein-sorting-associated protein 25 OS=Homo sapiens GN=VPS25 PE=1 SV=1;>tr|K7ENE3|K7ENE3_HUMAN Vacuolar	5	8	8	8	2	2	4	4	5	5	2	2	0	1	0	0	3	3	0	0	3	3	4	5	2	2	2	2	4	4	5	5	2	2	0	1	0	0	3	3	0	0
A0A0S2Z487;A0A024R1X8;P14923;A0A0S2Z495;Q7KZ86	A0A0S2Z487;A0A024R1X8;P14923	21;21;21;10;3	16;16;16;8;1	10;10;10;8;1	Junction plakoglobin	JUP	>tr|A0A0S2Z487|A0A0S2Z487_HUMAN Junction plakoglobin isoform 1 (Fragment) OS=Homo sapiens GN=JUP PE=2 SV=1;>tr|A0A024R1X8|A0A024R1X8_HUMAN Junction plakoglobin, isoform CRA_a OS=Homo sapiens GN=JUP PE=4 SV=1;>sp|P14923|PLAK_HUMAN Junction plakoglobin OS=Ho	5	21	16	10	2	2	5	5	5	4	0	0	13	12	1	0	4	4	3	3	5	4	3	4	10	12	1	1	2	2	3	2	0	0	11	10	1	0	1	1	2	2
Q8TC04;CON__Q9C075;A0A024R1X9;Q9C075;B2RBC7	Q8TC04;CON__Q9C075;A0A024R1X9;Q9C075;B2RBC7	2;2;2;2;1	1;1;1;1;1	1;1;1;1;1	Keratin, type I cytoskeletal 23	KRT23	>tr|Q8TC04|Q8TC04_HUMAN Keratin 23 (Histone deacetylase inducible) OS=Homo sapiens GN=KRT23 PE=2 SV=1;>Q9C075 SWISS-PROT:Q9C075 Tax_Id=9606 Gene_Symbol=KRT23 Keratin, type I cytoskeletal 23;>tr|A0A024R1X9|A0A024R1X9_HUMAN Keratin 23 (Histone deacetylase in	5	2	1	1	0	0	1	1	0	0	0	0	2	2	0	0	0	0	0	0	0	0	0	0	1	1	0	0	0	0	0	0	0	0	1	1	0	0	0	0	0	0
A0A024R1Z1;P49427;U3KQ77;U3KPV8	A0A024R1Z1;P49427;U3KQ77;U3KPV8	2;2;1;1	1;1;0;0	1;1;0;0	Ubiquitin-conjugating enzyme E2 R1	CDC34	>tr|A0A024R1Z1|A0A024R1Z1_HUMAN Cell division cycle 34, isoform CRA_a OS=Homo sapiens GN=CDC34 PE=3 SV=1;>sp|P49427|UB2R1_HUMAN Ubiquitin-conjugating enzyme E2 R1 OS=Homo sapiens GN=CDC34 PE=1 SV=2;>tr|U3KQ77|U3KQ77_HUMAN Ubiquitin-conjugating enzyme E2 R1	4	2	1	1	0	0	0	0	2	2	0	0	0	0	0	0	0	0	0	0	0	0	0	0	0	0	0	0	0	0	1	1	0	0	0	0	0	0	0	0	0	0
A0A024R1Z6;Q99536;B3KUF8;K7ESA3;K7ERT7;K7ENX2;K7EM19;K7EJM4;K7ER81;Q16464;Q9NQW1	A0A024R1Z6;Q99536;B3KUF8	21;21;14;9;9;3;3;1;1;1;1	21;21;14;9;9;3;3;1;1;1;1	21;21;14;9;9;3;3;1;1;1;1	Synaptic vesicle membrane protein VAT-1 homolog	VAT1	>tr|A0A024R1Z6|A0A024R1Z6_HUMAN Vesicle amine transport protein 1 homolog (T californica), isoform CRA_a OS=Homo sapiens GN=VAT1 PE=4 SV=1;>sp|Q99536|VAT1_HUMAN Synaptic vesicle membrane protein VAT-1 homolog OS=Homo sapiens GN=VAT1 PE=1 SV=2;>tr|B3KUF8|B3	11	21	21	21	13	12	13	13	17	18	8	8	14	14	12	12	17	14	12	12	11	11	12	12	17	17	13	12	13	13	17	18	8	8	14	14	12	12	17	14	12	12
A0A024R201;Q9UNM6;B2RBM7;Q53GN6;Q9Y6E3;A0A087WUL9;B4DJ66;J3KNQ3;E9PL38;Q9UNM7;H0YD73;E9PQG3;Q5HYL3;E9PPD2;F8W8J6	A0A024R201;Q9UNM6;B2RBM7;Q53GN6;Q9Y6E3;A0A087WUL9;B4DJ66;J3KNQ3;E9PL38	23;21;20;20;20;19;18;18;12;9;9;5;4;3;2	23;21;20;20;20;19;18;18;12;9;9;5;4;3;2	23;21;20;20;20;19;18;18;12;9;9;5;4;3;2	26S proteasome non-ATPase regulatory subunit 13	PSMD13	>tr|A0A024R201|A0A024R201_HUMAN Proteasome (Prosome, macropain) 26S subunit, non-ATPase, 13, isoform CRA_a OS=Homo sapiens GN=PSMD13 PE=4 SV=1;>sp|Q9UNM6|PSD13_HUMAN 26S proteasome non-ATPase regulatory subunit 13 OS=Homo sapiens GN=PSMD13 PE=1 SV=2;>tr|B2	15	23	23	23	6	5	7	8	15	14	5	6	11	11	2	2	11	11	5	5	5	7	6	5	6	5	6	5	7	8	15	14	5	6	11	11	2	2	11	11	5	5
A0A024R210	A0A024R210	3	2	2		IFITM1	>tr|A0A024R210|A0A024R210_HUMAN Interferon induced transmembrane protein 1 (9-27), isoform CRA_a OS=Homo sapiens GN=IFITM1 PE=4 SV=1	1	3	2	2	1	1	1	1	3	3	2	2	1	1	1	1	1	1	1	1	1	1	1	1	1	1	1	1	1	1	2	2	1	1	1	1	1	1	1	1	1	1
A0A024R222;B4DHQ3;Q9Y617;A0A024R280;B4DHX7;A9LS35	A0A024R222;B4DHQ3;Q9Y617;A0A024R280;B4DHX7	12;12;12;10;6;1	12;12;12;10;6;1	12;12;12;10;6;1	Phosphoserine aminotransferase	PSAT1	>tr|A0A024R222|A0A024R222_HUMAN Phosphoserine aminotransferase OS=Homo sapiens GN=PSAT1 PE=3 SV=1;>tr|B4DHQ3|B4DHQ3_HUMAN Phosphoserine aminotransferase OS=Homo sapiens PE=2 SV=1;>sp|Q9Y617|SERC_HUMAN Phosphoserine aminotransferase OS=Homo sapiens GN=PSAT1	6	12	12	12	4	5	7	7	6	6	1	1	7	7	2	2	5	5	2	2	5	6	7	8	6	7	4	5	7	7	6	6	1	1	7	7	2	2	5	5	2	2
A0A024R223;A0A024R238;Q96RL7;B3KW31;H0Y7P8	A0A024R223;A0A024R238;Q96RL7	15;15;15;4;2	15;15;15;4;2	15;15;15;4;2	Vacuolar protein sorting-associated protein 13A	VPS13A	>tr|A0A024R223|A0A024R223_HUMAN Vacuolar protein sorting 13A (Yeast), isoform CRA_c OS=Homo sapiens GN=VPS13A PE=4 SV=1;>tr|A0A024R238|A0A024R238_HUMAN Vacuolar protein sorting 13A (Yeast), isoform CRA_a OS=Homo sapiens GN=VPS13A PE=4 SV=1;>sp|Q96RL7|VP13A	5	15	15	15	0	0	0	0	11	12	0	0	0	1	0	0	1	1	0	0	0	0	0	0	0	0	0	0	0	0	11	12	0	0	0	1	0	0	1	1	0	0
B7Z2R3;A0A024R225;B7Z954;A0A024R233;A0A1B0GTW1;Q9UDY2	B7Z2R3;A0A024R225;B7Z954;A0A024R233;A0A1B0GTW1;Q9UDY2	5;5;5;5;5;5	5;5;5;5;5;5	5;5;5;5;5;5	Tight junction protein ZO-2	TJP2	>tr|B7Z2R3|B7Z2R3_HUMAN cDNA FLJ59510, highly similar to Homo sapiens tight junction protein 2 (TJP2), transcript variant 2, mRNA OS=Homo sapiens PE=2 SV=1;>tr|A0A024R225|A0A024R225_HUMAN Tight junction protein 2 (Zona occludens 2), isoform CRA_c OS=Homo s	6	5	5	5	0	0	1	0	2	2	0	0	1	0	0	0	1	1	0	0	0	0	1	2	1	1	0	0	1	0	2	2	0	0	1	0	0	0	1	1	0	0
Q5T6W2;B4DUQ1;B4DFF1;A0A024R228;Q6IBN1;Q5EC54;P61978;S4R457	Q5T6W2;B4DUQ1;B4DFF1;A0A024R228;Q6IBN1;Q5EC54;P61978	4;4;4;4;4;4;4;1	4;4;4;4;4;4;4;1	4;4;4;4;4;4;4;1	Heterogeneous nuclear ribonucleoprotein K	HNRNPK;HNRPK	>tr|Q5T6W2|Q5T6W2_HUMAN Heterogeneous nuclear ribonucleoprotein K (Fragment) OS=Homo sapiens GN=HNRNPK PE=1 SV=1;>tr|B4DUQ1|B4DUQ1_HUMAN cDNA FLJ54552, highly similar to Heterogeneous nuclear ribonucleoprotein K OS=Homo sapiens PE=2 SV=1;>tr|B4DFF1|B4DFF1_	8	4	4	4	0	0	1	1	1	1	0	0	1	1	0	0	2	3	0	0	1	1	0	0	0	0	0	0	1	1	1	1	0	0	1	1	0	0	2	3	0	0
A0A024R235;Q5VYS8;A0A0C4DFW3;X6R3Q3	A0A024R235;Q5VYS8;A0A0C4DFW3;X6R3Q3	2;2;1;1	2;2;1;1	2;2;1;1	Terminal uridylyltransferase 7	ZCCHC6	>tr|A0A024R235|A0A024R235_HUMAN Zinc finger, CCHC domain containing 6, isoform CRA_b OS=Homo sapiens GN=ZCCHC6 PE=4 SV=1;>sp|Q5VYS8|TUT7_HUMAN Terminal uridylyltransferase 7 OS=Homo sapiens GN=ZCCHC6 PE=1 SV=1;>tr|A0A0C4DFW3|A0A0C4DFW3_HUMAN Terminal uridy	4	2	2	2	0	0	0	0	1	0	0	0	0	1	0	0	1	1	0	1	0	0	0	0	0	0	0	0	0	0	1	0	0	0	0	1	0	0	1	1	0	1
A0A024R240;P50148;G9FP35;G3V1P7;B1AM21	A0A024R240;P50148;G9FP35	17;17;16;8;6	8;8;8;1;5	8;8;8;1;5	Guanine nucleotide-binding protein G(q) subunit alpha	GNAQ	>tr|A0A024R240|A0A024R240_HUMAN Guanine nucleotide binding protein (G protein), q polypeptide, isoform CRA_c OS=Homo sapiens GN=GNAQ PE=4 SV=1;>sp|P50148|GNAQ_HUMAN Guanine nucleotide-binding protein G(q) subunit alpha OS=Homo sapiens GN=GNAQ PE=1 SV=4;>tr	5	17	8	8	2	2	9	8	8	10	4	3	6	7	2	2	11	11	4	4	7	9	10	10	7	8	0	0	4	3	2	4	2	1	2	1	1	1	4	4	2	2
A0A024R258;B3KNI8;B3KNI2;Q9UMX0;Q59FJ2;B4DM19;B4DZF1;Q9UHD9;H0YDS0;D3DVA8;B4DZF6;Q59F94;Q9NRR5	A0A024R258;B3KNI8;B3KNI2;Q9UMX0;Q59FJ2	5;5;5;5;3;2;2;2;1;1;1;1;1	5;5;5;5;3;2;2;2;1;1;1;1;1	5;5;5;5;3;2;2;2;1;1;1;1;1	Ubiquilin-1	UBQLN1	>tr|A0A024R258|A0A024R258_HUMAN Ubiquilin 1, isoform CRA_d OS=Homo sapiens GN=UBQLN1 PE=4 SV=1;>tr|B3KNI8|B3KNI8_HUMAN cDNA FLJ14670 fis, clone NT2RP2003272, highly similar to Ubiquilin-1 OS=Homo sapiens PE=2 SV=1;>tr|B3KNI2|B3KNI2_HUMAN cDNA FLJ14650 fis,	13	5	5	5	0	0	0	1	0	0	2	2	0	0	0	0	2	1	2	2	0	0	1	1	0	3	0	0	0	1	0	0	2	2	0	0	0	0	2	1	2	2
A0A087WXM6;J3QQT2;J3QLC8;J3KRX5;A0A024R261;A0A0A0MRF8;A0A0A6YYL6;P18621;J3KRB3;A0A087WWH0;J3QS96;A0A087WY81;A4D1R6;A4D1R5	A0A087WXM6;J3QQT2;J3QLC8;J3KRX5;A0A024R261;A0A0A0MRF8;A0A0A6YYL6;P18621;J3KRB3;A0A087WWH0;J3QS96	7;7;7;7;7;7;7;7;5;5;5;3;1;1	7;7;7;7;7;7;7;7;5;5;5;3;1;1	7;7;7;7;7;7;7;7;5;5;5;3;1;1	60S ribosomal protein L17	RPL17;hCG_24487	>tr|A0A087WXM6|A0A087WXM6_HUMAN 60S ribosomal protein L17 (Fragment) OS=Homo sapiens GN=RPL17 PE=3 SV=1;>tr|J3QQT2|J3QQT2_HUMAN 60S ribosomal protein L17 (Fragment) OS=Homo sapiens GN=RPL17 PE=3 SV=1;>tr|J3QLC8|J3QLC8_HUMAN 60S ribosomal protein L17 OS=Hom	14	7	7	7	3	2	3	3	2	2	1	1	2	2	0	0	3	2	2	2	2	2	2	2	3	3	3	2	3	3	2	2	1	1	2	2	0	0	3	2	2	2
Q9BYG6;K7EIU8;A0A0S2Z4B2;A0A024R274;Q13485;K7EL18;K7EIJ2;K7ENG8;B4DZP1;K7ES96;K7EL15;A0A087WUF3	Q9BYG6;K7EIU8;A0A0S2Z4B2;A0A024R274;Q13485;K7EL18;K7EIJ2;K7ENG8;B4DZP1;K7ES96	3;3;3;3;3;2;2;2;2;2;1;1	3;3;3;3;3;2;2;2;2;2;1;1	3;3;3;3;3;2;2;2;2;2;1;1	Mothers against decapentaplegic homolog 4	SMAD4	>tr|Q9BYG6|Q9BYG6_HUMAN Mothers against decapentaplegic homolog (Fragment) OS=Homo sapiens GN=SMAD4 PE=3 SV=1;>tr|K7EIU8|K7EIU8_HUMAN Mothers against decapentaplegic homolog OS=Homo sapiens GN=SMAD4 PE=1 SV=1;>tr|A0A0S2Z4B2|A0A0S2Z4B2_HUMAN Mothers against	12	3	3	3	0	0	1	1	1	1	0	0	0	0	0	0	0	0	0	0	0	0	0	0	1	1	0	0	1	1	1	1	0	0	0	0	0	0	0	0	0	0
A0A024R276;P07711;A5PLM9;B3KQK4;Q5T8F0;Q9HBQ7;Q5K630;Q6LAF7	A0A024R276;P07711;A5PLM9;B3KQK4;Q5T8F0	12;12;11;11;9;3;2;2	12;12;11;11;9;3;2;2	11;11;10;10;8;3;2;2	Cathepsin L1;Cathepsin L1 heavy chain;Cathepsin L1 light chain	CTSL;CTSL1	>tr|A0A024R276|A0A024R276_HUMAN Cathepsin L, isoform CRA_a OS=Homo sapiens GN=CTSL PE=3 SV=1;>sp|P07711|CATL1_HUMAN Cathepsin L1 OS=Homo sapiens GN=CTSL PE=1 SV=2;>tr|A5PLM9|A5PLM9_HUMAN Cathepsin L1 OS=Homo sapiens GN=CTSL1 PE=2 SV=1;>tr|B3KQK4|B3KQK4_HUM	8	12	12	11	7	7	8	8	4	5	2	3	4	4	5	4	8	8	1	1	5	5	5	5	4	4	7	7	8	8	4	5	2	3	4	4	5	4	8	8	1	1
A0A024R2A7;P49257;B2R774;Q53FS4;A0PJ85;B4DVV0	A0A024R2A7;P49257;B2R774;Q53FS4	15;15;14;14;3;2	15;15;14;14;3;2	15;15;14;14;3;2	Protein ERGIC-53	LMAN1	>tr|A0A024R2A7|A0A024R2A7_HUMAN Lectin, mannose-binding, 1, isoform CRA_b OS=Homo sapiens GN=LMAN1 PE=4 SV=1;>sp|P49257|LMAN1_HUMAN Protein ERGIC-53 OS=Homo sapiens GN=LMAN1 PE=1 SV=2;>tr|B2R774|B2R774_HUMAN cDNA, FLJ93313, highly similar to Homo sapiens l	6	15	15	15	5	4	7	6	9	8	6	6	8	8	5	5	7	5	5	5	6	6	7	9	8	7	5	4	7	6	9	8	6	6	8	8	5	5	7	5	5	5
B2RD46;A0A024R2B0;Q96ES0	B2RD46;A0A024R2B0;Q96ES0	2;2;1	2;2;1	1;1;0		KIAA1468	>tr|B2RD46|B2RD46_HUMAN cDNA, FLJ96449 OS=Homo sapiens PE=2 SV=1;>tr|A0A024R2B0|A0A024R2B0_HUMAN KIAA1468, isoform CRA_b OS=Homo sapiens GN=KIAA1468 PE=4 SV=1;>tr|Q96ES0|Q96ES0_HUMAN KIAA1468 protein OS=Homo sapiens GN=KIAA1468 PE=2 SV=1	3	2	2	1	0	0	0	0	2	1	0	0	0	1	0	0	0	1	0	0	0	0	0	0	0	1	0	0	0	0	2	1	0	0	0	1	0	0	0	1	0	0
B2RCS7;A8K6Y4;A0A024R2B5;Q9Y5X9;B4DTR8;J3QQQ0;A0A075B751;J3KTN7	B2RCS7;A8K6Y4;A0A024R2B5;Q9Y5X9;B4DTR8;J3QQQ0	22;22;22;22;19;17;4;1	22;22;22;22;19;17;4;1	22;22;22;22;19;17;4;1	Endothelial lipase	LIPG	>tr|B2RCS7|B2RCS7_HUMAN cDNA, FLJ96256, highly similar to Homo sapiens lipase, endothelial (LIPG), mRNA OS=Homo sapiens PE=2 SV=1;>tr|A8K6Y4|A8K6Y4_HUMAN cDNA FLJ77993, highly similar to Homo sapiens endothelial lipase mRNA OS=Homo sapiens PE=2 SV=1;>tr|A0	8	22	22	22	11	13	16	16	14	14	8	7	13	13	10	10	11	11	10	10	16	16	13	13	13	14	11	13	16	16	14	14	8	7	13	13	10	10	11	11	10	10
A0A024R2B6;P36952;C9JLM5	A0A024R2B6;P36952	14;14;5	14;14;5	6;6;5	Serpin B5	SERPINB5	>tr|A0A024R2B6|A0A024R2B6_HUMAN Serpin peptidase inhibitor, clade B (Ovalbumin), member 5, isoform CRA_b OS=Homo sapiens GN=SERPINB5 PE=3 SV=1;>sp|P36952|SPB5_HUMAN Serpin B5 OS=Homo sapiens GN=SERPINB5 PE=1 SV=2	3	14	14	6	4	3	4	7	7	7	4	5	4	4	0	0	3	2	4	4	0	0	5	4	2	1	4	3	4	7	7	7	4	5	4	4	0	0	3	2	4	4
A8K5D8;A0A024R2C5;O75351;A8K4G7;K7EL71;K7EKZ3;Q6PJZ4;B3KNH6;Q6PIW4	A8K5D8;A0A024R2C5;O75351;A8K4G7	21;21;21;20;6;6;5;1;1	21;21;21;20;6;6;5;1;1	15;15;15;15;6;6;5;0;0	Vacuolar protein sorting-associated protein 4B	VPS4B	>tr|A8K5D8|A8K5D8_HUMAN cDNA FLJ75934, highly similar to Homo sapiens vacuolar protein sorting 4B (yeast) (VPS4B), mRNA OS=Homo sapiens PE=2 SV=1;>tr|A0A024R2C5|A0A024R2C5_HUMAN Vacuolar protein sorting 4B (Yeast), isoform CRA_a OS=Homo sapiens GN=VPS4B PE	9	21	21	15	7	7	9	10	9	10	6	5	9	9	5	5	11	12	9	9	13	11	10	10	14	15	7	7	9	10	9	10	6	5	9	9	5	5	11	12	9	9
B4DQT8;A0A024R2D4;B4E1J8;Q9NVJ2	B4DQT8;A0A024R2D4;B4E1J8;Q9NVJ2	8;8;8;8	8;8;8;8	4;4;4;4	ADP-ribosylation factor-like protein 8B	ARL8B	>tr|B4DQT8|B4DQT8_HUMAN cDNA FLJ61158, highly similar to ADP-ribosylation factor-like protein 8B OS=Homo sapiens PE=2 SV=1;>tr|A0A024R2D4|A0A024R2D4_HUMAN ADP-ribosylation factor-like 8B, isoform CRA_b OS=Homo sapiens GN=ARL8B PE=3 SV=1;>tr|B4E1J8|B4E1J8_H	4	8	8	4	2	2	3	3	1	1	0	0	4	4	0	0	4	4	2	3	3	3	1	1	6	6	2	2	3	3	1	1	0	0	4	4	0	0	4	4	2	3
A0A024R2E9;B3KQM6;B2RB57;O95352;B4DQK1;C9J415;C9JFF4;H7C2R3;H7BZ92;C9JE55;H7C2J8	A0A024R2E9;B3KQM6;B2RB57;O95352;B4DQK1	8;8;8;8;6;2;2;1;1;1;1	8;8;8;8;6;2;2;1;1;1;1	8;8;8;8;6;2;2;1;1;1;1	Ubiquitin-like modifier-activating enzyme ATG7	ATG7	>tr|A0A024R2E9|A0A024R2E9_HUMAN ATG7 autophagy related 7 homolog (S. cerevisiae), isoform CRA_b OS=Homo sapiens GN=ATG7 PE=4 SV=1;>tr|B3KQM6|B3KQM6_HUMAN cDNA FLJ90740 fis, clone PLACE1011045, highly similar to Autophagy-related protein 7 OS=Homo sapiens P	11	8	8	8	0	0	2	0	5	4	1	1	0	0	0	0	4	4	2	2	0	0	0	1	1	0	0	0	2	0	5	4	1	1	0	0	0	0	4	4	2	2
H7C0R6;H7C3J3;A0A024R2F4;Q9BV44	H7C0R6;H7C3J3;A0A024R2F4;Q9BV44	3;3;3;3	3;3;3;3	3;3;3;3	THUMP domain-containing protein 3	THUMPD3	>tr|H7C0R6|H7C0R6_HUMAN THUMP domain-containing protein 3 (Fragment) OS=Homo sapiens GN=THUMPD3 PE=1 SV=1;>tr|H7C3J3|H7C3J3_HUMAN THUMP domain-containing protein 3 (Fragment) OS=Homo sapiens GN=THUMPD3 PE=1 SV=1;>tr|A0A024R2F4|A0A024R2F4_HUMAN THUMP domain	4	3	3	3	0	0	1	1	0	1	1	1	1	0	0	0	2	2	0	0	1	0	1	0	1	1	0	0	1	1	0	1	1	1	1	0	0	0	2	2	0	0
D3YTB1;A0A024R2G7;F8W727;P62910	D3YTB1;A0A024R2G7;F8W727;P62910	4;4;4;4	4;4;4;4	4;4;4;4	60S ribosomal protein L32	RPL32	>tr|D3YTB1|D3YTB1_HUMAN 60S ribosomal protein L32 (Fragment) OS=Homo sapiens GN=RPL32 PE=1 SV=1;>tr|A0A024R2G7|A0A024R2G7_HUMAN Ribosomal protein L32, isoform CRA_a OS=Homo sapiens GN=RPL32 PE=4 SV=1;>tr|F8W727|F8W727_HUMAN 60S ribosomal protein L32 OS=Hom	4	4	4	4	1	1	3	3	3	2	0	0	3	3	0	0	2	2	1	1	1	1	1	1	0	0	1	1	3	3	3	2	0	0	3	3	0	0	2	2	1	1
A0A024R2G8;O15084;B4DIW9;B7Z6Z7;B4DS25;H7C4A0;Q53T07;H7C209;B3KWN0;Q8N8A2;Q8NB46	A0A024R2G8;O15084	7;7;3;2;1;1;1;1;1;1;1	7;7;3;2;1;1;1;1;1;1;1	7;7;3;2;1;1;1;1;1;1;1	Serine/threonine-protein phosphatase 6 regulatory ankyrin repeat subunit A	ANKRD28	>tr|A0A024R2G8|A0A024R2G8_HUMAN Ankyrin repeat domain 28, isoform CRA_c OS=Homo sapiens GN=ANKRD28 PE=4 SV=1;>sp|O15084|ANR28_HUMAN Serine/threonine-protein phosphatase 6 regulatory ankyrin repeat subunit A OS=Homo sapiens GN=ANKRD28 PE=1 SV=5	11	7	7	7	0	0	0	0	6	5	0	0	1	0	0	0	0	0	0	0	0	0	0	0	0	0	0	0	0	0	6	5	0	0	1	0	0	0	0	0	0	0
A0A024R2H7;Q96Q11	A0A024R2H7;Q96Q11	2;2	2;2	2;2	CCA tRNA nucleotidyltransferase 1, mitochondrial	TRNT1	>tr|A0A024R2H7|A0A024R2H7_HUMAN tRNA nucleotidyl transferase, CCA-adding, 1, isoform CRA_b OS=Homo sapiens GN=TRNT1 PE=3 SV=1;>sp|Q96Q11|TRNT1_HUMAN CCA tRNA nucleotidyltransferase 1, mitochondrial OS=Homo sapiens GN=TRNT1 PE=1 SV=2	2	2	2	2	0	0	0	0	0	0	0	0	0	1	0	0	0	0	1	1	0	0	1	1	1	1	0	0	0	0	0	0	0	0	0	1	0	0	0	0	1	1
A0A024R2K1;P20339;A0A0A1HAN9;F8WCY6;F8WD79	A0A024R2K1;P20339;A0A0A1HAN9	9;9;7;3;3	5;5;5;1;1	5;5;5;1;1	Ras-related protein Rab-5A	RAB5A	>tr|A0A024R2K1|A0A024R2K1_HUMAN RAB5A, member RAS oncogene family, isoform CRA_a OS=Homo sapiens GN=RAB5A PE=4 SV=1;>sp|P20339|RAB5A_HUMAN Ras-related protein Rab-5A OS=Homo sapiens GN=RAB5A PE=1 SV=2;>tr|A0A0A1HAN9|A0A0A1HAN9_HUMAN H.sapiens ras-related H	5	9	5	5	5	5	7	7	5	6	3	3	5	5	2	1	5	5	4	4	5	5	6	5	5	6	2	2	3	3	1	2	2	2	2	2	0	0	2	2	2	2
A0A024R2K4;Q9Y608;H7C3N9;C9JSU1	A0A024R2K4;Q9Y608;H7C3N9	5;5;3;2	4;4;3;1	4;4;3;1	Leucine-rich repeat flightless-interacting protein 2	LRRFIP2	>tr|A0A024R2K4|A0A024R2K4_HUMAN Leucine rich repeat (In FLII) interacting protein 2, isoform CRA_b OS=Homo sapiens GN=LRRFIP2 PE=4 SV=1;>sp|Q9Y608|LRRF2_HUMAN Leucine-rich repeat flightless-interacting protein 2 OS=Homo sapiens GN=LRRFIP2 PE=1 SV=1;>tr|H7C	4	5	4	4	0	0	0	0	0	0	2	2	1	0	0	0	1	1	1	1	1	1	0	0	1	1	0	0	0	0	0	0	2	2	1	0	0	0	0	0	1	1
A0A024R2L1;Q8TAF3	A0A024R2L1;Q8TAF3	3;3	3;3	3;3	WD repeat-containing protein 48	WDR48	>tr|A0A024R2L1|A0A024R2L1_HUMAN Testicular tissue protein Li 224 OS=Homo sapiens GN=WDR48 PE=2 SV=1;>sp|Q8TAF3|WDR48_HUMAN WD repeat-containing protein 48 OS=Homo sapiens GN=WDR48 PE=1 SV=1	2	3	3	3	0	0	0	0	1	0	0	0	1	1	0	0	0	0	0	0	0	0	1	1	0	0	0	0	0	0	1	0	0	0	1	1	0	0	0	0	0	0
H0Y4D4;Q8NCW8;B4DEN6;C9JDE9;A0A024R2M6;P09110;H7C131;A0A140VJX0;B4E072	H0Y4D4;Q8NCW8;B4DEN6;C9JDE9;A0A024R2M6;P09110;H7C131;A0A140VJX0	3;3;3;3;3;3;2;2;1	3;3;3;3;3;3;2;2;1	3;3;3;3;3;3;2;2;1	3-ketoacyl-CoA thiolase, peroxisomal	ACAA1	>tr|H0Y4D4|H0Y4D4_HUMAN 3-ketoacyl-CoA thiolase, peroxisomal (Fragment) OS=Homo sapiens GN=ACAA1 PE=1 SV=1;>tr|Q8NCW8|Q8NCW8_HUMAN 3-oxoacyl-CoA thiolase (Fragment) OS=Homo sapiens PE=2 SV=1;>tr|B4DEN6|B4DEN6_HUMAN cDNA FLJ55549, highly similar to 3-ketoac	9	3	3	3	0	0	0	1	1	1	0	0	0	0	0	0	1	1	1	1	0	0	0	0	0	0	0	0	0	1	1	1	0	0	0	0	0	0	1	1	1	1
A0A024R2M7;O95747;C9JIG9;F8WBK9	A0A024R2M7;O95747;C9JIG9	14;14;12;3	10;10;8;1	10;10;8;1	Serine/threonine-protein kinase OSR1	OXSR1	>tr|A0A024R2M7|A0A024R2M7_HUMAN Oxidative-stress responsive 1, isoform CRA_a OS=Homo sapiens GN=OXSR1 PE=4 SV=1;>sp|O95747|OXSR1_HUMAN Serine/threonine-protein kinase OSR1 OS=Homo sapiens GN=OXSR1 PE=1 SV=1;>tr|C9JIG9|C9JIG9_HUMAN Serine/threonine-protein	4	14	10	10	5	4	4	4	7	7	5	4	5	5	2	2	8	8	5	4	4	3	4	4	5	5	3	3	3	3	5	5	3	2	4	4	2	2	5	5	3	2
C9J9K3;A0A024R2P0;A0A0C4DG17;P08865;A0A024R7P5;Q96RS2;F8WD59;A0A024RCF2	C9J9K3;A0A024R2P0;A0A0C4DG17;P08865;A0A024R7P5;Q96RS2	11;11;11;11;7;7;5;1	11;11;11;11;7;7;5;1	11;11;11;11;7;7;5;1	40S ribosomal protein SA	RPSA;LOC388524	>tr|C9J9K3|C9J9K3_HUMAN 40S ribosomal protein SA (Fragment) OS=Homo sapiens GN=RPSA PE=1 SV=8;>tr|A0A024R2P0|A0A024R2P0_HUMAN 40S ribosomal protein SA OS=Homo sapiens GN=RPSA PE=3 SV=1;>tr|A0A0C4DG17|A0A0C4DG17_HUMAN 40S ribosomal protein SA OS=Homo sapien	8	11	11	11	6	6	2	3	9	9	5	5	6	6	3	4	7	7	4	4	5	5	2	3	3	4	6	6	2	3	9	9	5	5	6	6	3	4	7	7	4	4
B4DSW9;B4DL06;B4DGU4;A0A024R2Q3;P35222;B5BU28	B4DSW9;B4DL06;B4DGU4;A0A024R2Q3;P35222;B5BU28	22;22;22;22;22;21	22;22;22;22;22;21	17;17;17;17;17;16	Catenin beta-1	CTNNB1	>tr|B4DSW9|B4DSW9_HUMAN cDNA FLJ59415, highly similar to Beta-catenin OS=Homo sapiens PE=2 SV=1;>tr|B4DL06|B4DL06_HUMAN cDNA FLJ59565, highly similar to Beta-catenin OS=Homo sapiens PE=2 SV=1;>tr|B4DGU4|B4DGU4_HUMAN Catenin beta-1 OS=Homo sapiens GN=CTNNB1	6	22	22	17	5	3	10	9	12	14	3	3	10	10	1	0	11	10	5	5	7	7	9	8	9	11	5	3	10	9	12	14	3	3	10	10	1	0	11	10	5	5
E7EQV9;A0A024R2Q4;P61313;E7ENU7;E7EX53;B4DLP4;B4DEN1;E7ERA2;A4D1Q5	E7EQV9;A0A024R2Q4;P61313;E7ENU7;E7EX53;B4DLP4	6;6;6;5;4;3;2;1;1	6;6;6;5;4;3;2;1;1	6;6;6;5;4;3;2;1;1	Ribosomal protein L15;60S ribosomal protein L15	RPL15	>tr|E7EQV9|E7EQV9_HUMAN Ribosomal protein L15 (Fragment) OS=Homo sapiens GN=RPL15 PE=1 SV=1;>tr|A0A024R2Q4|A0A024R2Q4_HUMAN Ribosomal protein L15 OS=Homo sapiens GN=RPL15 PE=3 SV=1;>sp|P61313|RL15_HUMAN 60S ribosomal protein L15 OS=Homo sapiens GN=RPL15 PE	9	6	6	6	3	3	3	3	4	4	1	1	3	3	2	0	3	3	1	2	3	3	3	3	3	2	3	3	3	3	4	4	1	1	3	3	2	0	3	3	1	2
E9PHK0;B2R582;A0A024R2Q7;P05452;Q68DS3;CON__Q2KIS7	E9PHK0;B2R582;A0A024R2Q7;P05452;Q68DS3;CON__Q2KIS7	3;3;3;3;2;2	3;3;3;3;2;2	3;3;3;3;2;2	Tetranectin	CLEC3B;DKFZp686H17246	>tr|E9PHK0|E9PHK0_HUMAN Tetranectin OS=Homo sapiens GN=CLEC3B PE=1 SV=1;>tr|B2R582|B2R582_HUMAN cDNA, FLJ92374, highly similar to Homo sapiens C-type lectin domain family 3, member B (CLEC3B), mRNA OS=Homo sapiens PE=2 SV=1;>tr|A0A024R2Q7|A0A024R2Q7_HUMAN	6	3	3	3	0	0	0	0	0	0	1	1	0	0	1	0	0	0	1	0	0	0	0	0	0	0	0	0	0	0	0	0	1	1	0	0	1	0	0	0	1	0
Q53H56;A0A024R2X6;Q53FJ3;Q08AK7;A0A024R2T0;Q13107;C9JNU9;H7C189	Q53H56;A0A024R2X6;Q53FJ3;Q08AK7;A0A024R2T0;Q13107;C9JNU9	3;3;3;3;3;3;2;1	3;3;3;3;3;3;2;1	3;3;3;3;3;3;2;1	Ubiquitin carboxyl-terminal hydrolase;Ubiquitin carboxyl-terminal hydrolase 4	USP4	>tr|Q53H56|Q53H56_HUMAN Ubiquitin specific protease, proto-oncogene isoform b variant (Fragment) OS=Homo sapiens PE=2 SV=1;>tr|A0A024R2X6|A0A024R2X6_HUMAN Ubiquitin specific peptidase 4 (Proto-oncogene), isoform CRA_b OS=Homo sapiens GN=USP4 PE=3 SV=1;>tr|	8	3	3	3	0	0	0	0	3	3	0	0	0	0	0	0	1	1	0	0	0	0	0	0	0	0	0	0	0	0	3	3	0	0	0	0	0	0	1	1	0	0
A0A024R2U9;C9JIF9;P13798;H7C393;H7C1U0;C9JLK2;F8WEH5;H0YFE5	A0A024R2U9;C9JIF9;P13798;H7C393	24;24;24;14;11;7;3;1	24;24;24;14;11;7;3;1	24;24;24;14;11;7;3;1	Acylamino-acid-releasing enzyme	APEH	>tr|A0A024R2U9|A0A024R2U9_HUMAN N-acylaminoacyl-peptide hydrolase, isoform CRA_b OS=Homo sapiens GN=APEH PE=4 SV=1;>tr|C9JIF9|C9JIF9_HUMAN Acylamino-acid-releasing enzyme OS=Homo sapiens GN=APEH PE=1 SV=1;>sp|P13798|ACPH_HUMAN Acylamino-acid-releasing enzy	8	24	24	24	4	4	8	7	17	18	8	6	10	10	2	2	10	10	4	3	7	7	6	6	10	10	4	4	8	7	17	18	8	6	10	10	2	2	10	10	4	3
A8KAH7;A0A024R2W3;P13861;A0A0S2Z472;H7C330;H7C1L0;C9J830;A0A0K0K1I3;H7C4A9	A8KAH7;A0A024R2W3;P13861;A0A0S2Z472	26;26;26;25;10;6;5;5;4	26;26;26;25;10;6;5;5;4	23;23;23;22;8;5;5;5;4	cAMP-dependent protein kinase type II-alpha regulatory subunit	PRKAR2A	>tr|A8KAH7|A8KAH7_HUMAN cDNA FLJ75444, highly similar to Homo sapiens protein kinase, cAMP-dependent, regulatory, type II, alpha (PRKAR2A), mRNA OS=Homo sapiens PE=2 SV=1;>tr|A0A024R2W3|A0A024R2W3_HUMAN Protein kinase cAMP-dependent regulatory type II alph	9	26	26	23	11	10	14	15	23	23	10	9	12	11	8	7	16	18	9	8	15	14	16	15	17	16	11	10	14	15	23	23	10	9	12	11	8	7	16	18	9	8
A0A024R2W4;Q14118;B4DN78;C9JYS1;C9J196;C9JQL4	A0A024R2W4;Q14118;B4DN78	8;8;5;1;1;1	8;8;5;1;1;1	8;8;5;1;1;1	Dystroglycan;Alpha-dystroglycan;Beta-dystroglycan	DAG1	>tr|A0A024R2W4|A0A024R2W4_HUMAN Dystroglycan 1 (Dystrophin-associated glycoprotein 1), isoform CRA_a OS=Homo sapiens GN=DAG1 PE=4 SV=1;>sp|Q14118|DAG1_HUMAN Dystroglycan OS=Homo sapiens GN=DAG1 PE=1 SV=2;>tr|B4DN78|B4DN78_HUMAN cDNA FLJ51254, highly simila	6	8	8	8	3	2	3	3	5	5	1	1	2	3	0	1	2	2	0	0	3	3	2	2	4	4	3	2	3	3	5	5	1	1	2	3	0	1	2	2	0	0
C9J8E1;B5BUJ8;B2R8Z2;A8K4K4;A0A024R2W7;Q16644;A0A024R177;A0A024RBU5;Q96PN8;O43930;P51817;P49137	C9J8E1;B5BUJ8;B2R8Z2;A8K4K4;A0A024R2W7;Q16644;A0A024R177;A0A024RBU5;Q96PN8;O43930;P51817;P49137	2;2;2;2;2;2;1;1;1;1;1;1	2;2;2;2;2;2;1;1;1;1;1;1	2;2;2;2;2;2;1;1;1;1;1;1	MAP kinase-activated protein kinase 3;Testis-specific serine/threonine-protein kinase 3;Putative serine/threonine-protein kinase PRKY;cAMP-dependent protein kinase catalytic subunit PRKX;MAP kinase-activated protein kinase 2	MAPKAPK3;PRKY;PRKX;TSSK3;MAPKAPK2	>tr|C9J8E1|C9J8E1_HUMAN MAP kinase-activated protein kinase 3 (Fragment) OS=Homo sapiens GN=MAPKAPK3 PE=1 SV=1;>tr|B5BUJ8|B5BUJ8_HUMAN Mitogen-activated protein kinase-activated protein kinase 3 (Fragment) OS=Homo sapiens GN=MAPKAPK3 PE=2 SV=1;>tr|B2R8Z2|B	12	2	2	2	0	0	0	0	1	1	0	0	1	1	0	0	0	0	0	0	0	0	0	0	0	0	0	0	0	0	1	1	0	0	1	1	0	0	0	0	0	0
A0A024R2X1;Q9Y5P6;A0A024R329	A0A024R2X1;Q9Y5P6;A0A024R329	15;15;14	15;15;14	15;15;14	Mannose-1-phosphate guanyltransferase beta	GMPPB	>tr|A0A024R2X1|A0A024R2X1_HUMAN GDP-mannose pyrophosphorylase B, isoform CRA_b OS=Homo sapiens GN=GMPPB PE=4 SV=1;>sp|Q9Y5P6|GMPPB_HUMAN Mannose-1-phosphate guanyltransferase beta OS=Homo sapiens GN=GMPPB PE=1 SV=2;>tr|A0A024R329|A0A024R329_HUMAN GDP-manno	3	15	15	15	5	6	6	6	10	9	5	4	6	6	1	0	7	7	3	3	5	4	6	6	5	5	5	6	6	6	10	9	5	4	6	6	1	0	7	7	3	3
A0A024R316;Q6DK41;P41221;B3KQX9;F5H364;C9J8I8;F5H7Q6;Q59G81;Q9H1J7;F5H034	A0A024R316;Q6DK41;P41221;B3KQX9	5;5;5;4;2;2;2;2;2;1	5;5;5;4;2;2;2;2;2;1	5;5;5;4;2;2;2;2;2;1	Protein Wnt;Protein Wnt-5a	WNT5A	>tr|A0A024R316|A0A024R316_HUMAN Protein Wnt OS=Homo sapiens GN=WNT5A PE=3 SV=1;>tr|Q6DK41|Q6DK41_HUMAN Protein Wnt (Fragment) OS=Homo sapiens GN=WNT5A PE=2 SV=2;>sp|P41221|WNT5A_HUMAN Protein Wnt-5a OS=Homo sapiens GN=WNT5A PE=1 SV=2;>tr|B3KQX9|B3KQX9_HUMA	10	5	5	5	0	0	0	0	3	4	0	0	1	1	0	0	0	0	0	0	0	0	0	0	0	0	0	0	0	0	3	4	0	0	1	1	0	0	0	0	0	0
A0A024R319;P55268;Q15483;Q8N9Q8;F5H520;Q9UHI2;C9JMJ0;B4DTV7;B7ZMJ6;A4D0S4	A0A024R319;P55268	89;89;37;14;8;1;1;1;1;1	89;89;37;14;8;1;1;1;1;1	89;89;37;14;8;1;1;1;1;1	Laminin subunit beta-2	LAMB2	>tr|A0A024R319|A0A024R319_HUMAN Laminin, beta 2 (Laminin S), isoform CRA_a OS=Homo sapiens GN=LAMB2 PE=4 SV=1;>sp|P55268|LAMB2_HUMAN Laminin subunit beta-2 OS=Homo sapiens GN=LAMB2 PE=1 SV=2	10	89	89	89	38	40	48	46	66	67	35	34	38	37	33	36	37	35	22	22	31	35	33	36	30	32	38	40	48	46	66	67	35	34	38	37	33	36	37	35	22	22
A0A024R324;P61586;B4DKN9;Q9BVT0;C9JNR4;C9JX21;C9JRM1	A0A024R324;P61586;B4DKN9;Q9BVT0;C9JNR4;C9JX21	16;16;14;10;10;10;4	8;8;7;7;3;3;1	3;3;3;3;2;2;0	Transforming protein RhoA	RHOA;ARHA	>tr|A0A024R324|A0A024R324_HUMAN Ras homolog gene family, member A, isoform CRA_a OS=Homo sapiens GN=RHOA PE=4 SV=1;>sp|P61586|RHOA_HUMAN Transforming protein RhoA OS=Homo sapiens GN=RHOA PE=1 SV=1;>tr|B4DKN9|B4DKN9_HUMAN cDNA FLJ57740, highly similar to Tr	7	16	8	3	10	10	11	11	14	14	8	8	12	12	9	8	12	12	9	9	11	12	12	12	10	10	4	4	6	6	6	6	5	5	6	6	5	4	6	6	6	6
A0A024R326;Q6IPI1;P47914	A0A024R326;Q6IPI1;P47914	2;2;2	2;2;2	2;2;2	60S ribosomal protein L29	RPL29	>tr|A0A024R326|A0A024R326_HUMAN Ribosomal protein L29, isoform CRA_a OS=Homo sapiens GN=RPL29 PE=4 SV=1;>tr|Q6IPI1|Q6IPI1_HUMAN Ribosomal protein L29 OS=Homo sapiens GN=RPL29 PE=2 SV=1;>sp|P47914|RL29_HUMAN 60S ribosomal protein L29 OS=Homo sapiens GN=RPL2	3	2	2	2	0	0	0	0	1	1	0	0	2	2	0	0	1	1	0	0	0	0	0	1	0	0	0	0	0	0	1	1	0	0	2	2	0	0	1	1	0	0
A0A024R328;Q05655;B4DFV1;C9K0E3;C9J9P1;C9JZU8;A0A087X0I9;Q04759	A0A024R328;Q05655;B4DFV1	18;18;17;4;2;1;1;1	18;18;17;4;2;1;1;1	18;18;17;4;2;1;1;1	Protein kinase C delta type;Protein kinase C delta type;Protein kinase C delta type regulatory subunit;Protein kinase C delta type catalytic subunit;Protein kinase C	PRKCD	>tr|A0A024R328|A0A024R328_HUMAN Protein kinase C delta type OS=Homo sapiens GN=PRKCD PE=3 SV=1;>sp|Q05655|KPCD_HUMAN Protein kinase C delta type OS=Homo sapiens GN=PRKCD PE=1 SV=2;>tr|B4DFV1|B4DFV1_HUMAN Protein kinase C OS=Homo sapiens PE=2 SV=1	8	18	18	18	5	6	8	8	12	12	4	4	6	6	2	2	7	8	3	3	7	5	8	9	5	6	5	6	8	8	12	12	4	4	6	6	2	2	7	8	3	3
A0A024R374;P07858;A8K2H4;B4DMY4;B3KUJ8;E9PR54;E9PJ67;E9PCB3;E9PKQ7;E9PNL5;E9PHZ5;E9PLY3;E9PSG5;E9PQM1;R4GMQ5;E9PS78;Q6LAF9;E9PIS1;E9PL32;E9PKX0	A0A024R374;P07858;A8K2H4;B4DMY4;B3KUJ8	13;13;12;8;8;5;5;5;5;5;5;5;5;5;4;4;4;2;2;2	13;13;12;8;8;5;5;5;5;5;5;5;5;5;4;4;4;2;2;2	2;2;2;0;0;2;2;2;2;2;2;2;2;2;0;2;0;2;2;2	Cathepsin B;Cathepsin B light chain;Cathepsin B heavy chain	CTSB	>tr|A0A024R374|A0A024R374_HUMAN Cathepsin B, isoform CRA_a OS=Homo sapiens GN=CTSB PE=3 SV=1;>sp|P07858|CATB_HUMAN Cathepsin B OS=Homo sapiens GN=CTSB PE=1 SV=3;>tr|A8K2H4|A8K2H4_HUMAN cDNA FLJ78235 OS=Homo sapiens PE=2 SV=1;>tr|B4DMY4|B4DMY4_HUMAN cDNA FL	20	13	13	2	5	5	7	9	9	9	6	6	8	7	5	5	7	6	5	4	10	9	7	8	8	9	5	5	7	9	9	9	6	6	8	7	5	5	7	6	5	4
J3KS94;J3QQK6;A0A024R384;P02686;J3QKN5	J3KS94;J3QQK6;A0A024R384;P02686;J3QKN5	4;4;4;4;3	4;4;4;4;3	4;4;4;4;3	Myelin basic protein	MBP	>tr|J3KS94|J3KS94_HUMAN Myelin basic protein (Fragment) OS=Homo sapiens GN=MBP PE=1 SV=1;>tr|J3QQK6|J3QQK6_HUMAN Myelin basic protein OS=Homo sapiens GN=MBP PE=1 SV=1;>tr|A0A024R384|A0A024R384_HUMAN Myelin basic protein, isoform CRA_a OS=Homo sapiens GN=MB	5	4	4	4	1	1	2	1	1	1	1	1	0	0	0	0	2	2	2	2	0	0	1	1	1	1	1	1	2	1	1	1	1	1	0	0	0	0	2	2	2	2
A0A024R3C3;A0A024R394;Q9UHD1;Q9NZ93;E9PHZ2;E9PPQ5	A0A024R3C3;A0A024R394;Q9UHD1;Q9NZ93;E9PHZ2	4;4;4;3;3;1	4;4;4;3;3;1	4;4;4;3;3;1	Cysteine and histidine-rich domain-containing protein 1	CHORDC1	>tr|A0A024R3C3|A0A024R3C3_HUMAN Cysteine and histidine-rich domain (CHORD)-containing 1, isoform CRA_b OS=Homo sapiens GN=CHORDC1 PE=4 SV=1;>tr|A0A024R394|A0A024R394_HUMAN Cysteine and histidine-rich domain (CHORD)-containing 1, isoform CRA_c OS=Homo sapie	6	4	4	4	0	1	2	2	2	2	0	0	1	1	0	0	2	2	1	1	1	1	0	0	0	0	0	1	2	2	2	2	0	0	1	1	0	0	2	2	1	1
A8K718;A0A024R396;Q9H0W9;A0A087WT99;E9PJU8;E9PQS1;E9PPB5;A0A024R3B0;E9PIP1;E9PR95;E9PSC3;E9PLC5;E9PLB3	A8K718;A0A024R396;Q9H0W9;A0A087WT99;E9PJU8;E9PQS1;E9PPB5;A0A024R3B0	13;13;13;12;11;10;8;8;3;2;2;2;2	13;13;13;12;11;10;8;8;3;2;2;2;2	13;13;13;12;11;10;8;8;3;2;2;2;2	Ester hydrolase C11orf54	C11orf54	>tr|A8K718|A8K718_HUMAN cDNA FLJ77502 OS=Homo sapiens PE=2 SV=1;>tr|A0A024R396|A0A024R396_HUMAN Chromosome 11 open reading frame 54, isoform CRA_a OS=Homo sapiens GN=C11orf54 PE=4 SV=1;>sp|Q9H0W9|CK054_HUMAN Ester hydrolase C11orf54 OS=Homo sapiens GN=C11o	13	13	13	13	6	6	5	5	9	9	5	5	6	6	0	0	6	6	5	5	4	4	5	5	6	7	6	6	5	5	9	9	5	5	6	6	0	0	6	6	5	5
A0A024R3E3;P02647;F8W696;Q9Y355;Q8TDB0	A0A024R3E3;P02647;F8W696	21;21;18;6;1	21;21;18;6;1	21;21;18;6;1	Apolipoprotein A-I;Proapolipoprotein A-I;Truncated apolipoprotein A-I	APOA1	>tr|A0A024R3E3|A0A024R3E3_HUMAN Apolipoprotein A-I, isoform CRA_a OS=Homo sapiens GN=APOA1 PE=3 SV=1;>sp|P02647|APOA1_HUMAN Apolipoprotein A-I OS=Homo sapiens GN=APOA1 PE=1 SV=1;>tr|F8W696|F8W696_HUMAN Apolipoprotein A-I OS=Homo sapiens GN=APOA1 PE=1 SV=1	5	21	21	21	18	18	15	15	10	12	6	6	16	16	10	10	19	19	7	8	16	16	15	17	13	14	18	18	15	15	10	12	6	6	16	16	10	10	19	19	7	8
A0A024R3H2;Q92673;E9PKB0;B4DG45;E9PS32;B4DHG9;E9PP43;B4DYT0;E9PPB3;B4DJ13	A0A024R3H2;Q92673;E9PKB0;B4DG45;E9PS32;B4DHG9;E9PP43;B4DYT0;E9PPB3;B4DJ13	18;18;9;9;9;9;9;9;9;9	18;18;9;9;9;9;9;9;9;9	18;18;9;9;9;9;9;9;9;9	Sortilin-related receptor	SORL1	>tr|A0A024R3H2|A0A024R3H2_HUMAN Sortilin-related receptor, L(DLR class) A repeats-containing, isoform CRA_b OS=Homo sapiens GN=SORL1 PE=4 SV=1;>sp|Q92673|SORL_HUMAN Sortilin-related receptor OS=Homo sapiens GN=SORL1 PE=1 SV=2;>tr|E9PKB0|E9PKB0_HUMAN Sortil	10	18	18	18	0	0	2	2	10	9	2	2	0	0	1	1	8	9	1	0	2	2	0	0	1	1	0	0	2	2	10	9	2	2	0	0	1	1	8	9	1	0
A0A024R3J7;P46977	A0A024R3J7;P46977	2;2	2;2	2;2	Dolichyl-diphosphooligosaccharide--protein glycosyltransferase subunit STT3A	hCG_2032701;STT3A	>tr|A0A024R3J7|A0A024R3J7_HUMAN HCG2032701, isoform CRA_a OS=Homo sapiens GN=hCG_2032701 PE=4 SV=1;>sp|P46977|STT3A_HUMAN Dolichyl-diphosphooligosaccharide--protein glycosyltransferase subunit STT3A OS=Homo sapiens GN=STT3A PE=1 SV=2	2	2	2	2	0	0	1	1	2	2	0	0	0	0	0	0	1	1	0	0	0	0	0	0	0	0	0	0	1	1	2	2	0	0	0	0	0	0	1	1	0	0
A0A024R3L9;Q4G0F5;H0YCI7;A0A0D9SFQ6	A0A024R3L9;Q4G0F5	11;11;2;1	10;10;2;1	10;10;2;1	Vacuolar protein sorting-associated protein 26B	VPS26B	>tr|A0A024R3L9|A0A024R3L9_HUMAN Vacuolar protein sorting 26 homolog B (Yeast), isoform CRA_a OS=Homo sapiens GN=VPS26B PE=4 SV=1;>sp|Q4G0F5|VP26B_HUMAN Vacuolar protein sorting-associated protein 26B OS=Homo sapiens GN=VPS26B PE=1 SV=2	4	11	10	10	1	1	4	4	6	7	4	4	2	2	1	1	3	4	0	0	4	4	4	4	5	5	0	0	3	3	5	6	4	4	1	1	1	1	2	3	0	0
B4E3I5;A0A024R3N3;A0A140VJE9;Q06481;E9PQS3;B4DKY3;B4DTV1;E9PSC7;E9PK76	B4E3I5;A0A024R3N3;A0A140VJE9;Q06481;E9PQS3;B4DKY3;B4DTV1	14;14;14;14;8;7;7;5;2	12;12;12;12;8;7;5;5;2	12;12;12;12;8;7;5;5;2	Amyloid-like protein 2	APLP2	>tr|B4E3I5|B4E3I5_HUMAN cDNA FLJ56216, highly similar to Amyloid-like protein 2 (CDEIbox-binding protein) (CDEBP) OS=Homo sapiens PE=2 SV=1;>tr|A0A024R3N3|A0A024R3N3_HUMAN Amyloid beta (A4)-like protein 2, isoform CRA_a OS=Homo sapiens GN=APLP2 PE=4 SV=1;>	9	14	12	12	2	2	3	4	4	5	3	3	2	2	2	1	6	6	3	4	8	8	5	7	5	4	2	2	2	3	3	3	3	3	1	1	0	0	5	5	3	4
B3KMR6;A0A024R3T3;O94886;Q2HIZ8;X6RI56	B3KMR6;A0A024R3T3;O94886	17;17;17;3;2	17;17;17;3;2	17;17;17;3;2	CSC1-like protein 1	TMEM63A	>tr|B3KMR6|B3KMR6_HUMAN cDNA FLJ12440 fis, clone NT2RM1000131, highly similar to Homo sapiens transmembrane protein 63A (TMEM63A), mRNA OS=Homo sapiens PE=2 SV=1;>tr|A0A024R3T3|A0A024R3T3_HUMAN Transmembrane protein 63A, isoform CRA_a OS=Homo sapiens GN=TM	5	17	17	17	5	6	12	11	10	10	7	7	6	5	1	1	9	9	5	5	8	9	11	10	9	9	5	6	12	11	10	10	7	7	6	5	1	1	9	9	5	5
A0A0A1HAV9;Q53GC2;A0A024R3U9;P20338;A0A087WYT5	A0A0A1HAV9;Q53GC2;A0A024R3U9;P20338	8;8;8;8;3	8;8;8;8;3	4;4;4;4;3	Ras-related protein Rab-4A	RAB4A	>tr|A0A0A1HAV9|A0A0A1HAV9_HUMAN H.sapiens ras-related Hrab4 protein OS=Homo sapiens PE=2 SV=1;>tr|Q53GC2|Q53GC2_HUMAN RAB4A, member RAS oncogene family variant (Fragment) OS=Homo sapiens PE=2 SV=1;>tr|A0A024R3U9|A0A024R3U9_HUMAN RAB4A, member RAS oncogene	5	8	8	4	1	1	1	1	7	6	0	0	3	3	0	0	4	4	3	3	1	1	3	3	2	1	1	1	1	1	7	6	0	0	3	3	0	0	4	4	3	3
A0A024R3V4;Q9H2H8;C9K058;B8ZZ77;A0A0S2Z5A8;H7BZ14;B4DN80;F8WC82;C9J4N2;Q86UR0;A0A0S2Z5X8	A0A024R3V4;Q9H2H8;C9K058;B8ZZ77;A0A0S2Z5A8;H7BZ14;B4DN80	4;4;3;3;3;3;3;1;1;1;1	4;4;3;3;3;3;3;1;1;1;1	4;4;3;3;3;3;3;1;1;1;1	Peptidyl-prolyl cis-trans isomerase;Peptidyl-prolyl cis-trans isomerase-like 3	PPIL3	>tr|A0A024R3V4|A0A024R3V4_HUMAN Peptidyl-prolyl cis-trans isomerase OS=Homo sapiens GN=PPIL3 PE=2 SV=1;>sp|Q9H2H8|PPIL3_HUMAN Peptidyl-prolyl cis-trans isomerase-like 3 OS=Homo sapiens GN=PPIL3 PE=1 SV=1;>tr|C9K058|C9K058_HUMAN Peptidyl-prolyl cis-trans is	11	4	4	4	0	0	1	1	2	2	0	0	0	0	0	0	3	2	0	0	2	2	0	0	0	1	0	0	1	1	2	2	0	0	0	0	0	0	3	2	0	0
Q658J0;A0A024R3V5;A0A024R3V7;Q9GZT8;C9JN42;B8ZZI0;E7EXA3;Q6X734	Q658J0;A0A024R3V5;A0A024R3V7;Q9GZT8	7;7;7;7;3;3;3;3	7;7;7;7;3;3;3;3	7;7;7;7;3;3;3;3	Putative GTP cyclohydrolase 1 type 2;Putative GTP cyclohydrolase 1 type 2 NIF3L1	DKFZp762L015;NIF3L1	>tr|Q658J0|Q658J0_HUMAN Putative uncharacterized protein DKFZp762L015 (Fragment) OS=Homo sapiens GN=DKFZp762L015 PE=2 SV=1;>tr|A0A024R3V5|A0A024R3V5_HUMAN NIF3-like protein 1 OS=Homo sapiens GN=NIF3L1 PE=3 SV=1;>tr|A0A024R3V7|A0A024R3V7_HUMAN NIF3-like pro	8	7	7	7	0	0	1	1	4	4	2	3	0	0	0	0	2	3	0	0	0	0	0	0	1	1	0	0	1	1	4	4	2	3	0	0	0	0	2	3	0	0
A0A024R3V8;Q99598;C4P0D6;C4P0D8;C4P0D4;Q5VVQ1;Q7Z3N9;Q9NRI2	A0A024R3V8;Q99598;C4P0D6;C4P0D8;C4P0D4;Q5VVQ1	9;9;6;6;5;5;2;1	9;9;6;6;5;5;2;1	9;9;6;6;5;5;2;1	Translin-associated protein X	TSNAX;DISC1	>tr|A0A024R3V8|A0A024R3V8_HUMAN Translin-associated factor X, isoform CRA_c OS=Homo sapiens GN=TSNAX PE=4 SV=1;>sp|Q99598|TSNAX_HUMAN Translin-associated protein X OS=Homo sapiens GN=TSNAX PE=1 SV=1;>tr|C4P0D6|C4P0D6_HUMAN Disrupted in schizophrenia 1 isof	8	9	9	9	0	0	2	2	5	6	3	3	1	0	1	1	3	2	1	1	0	0	1	0	0	1	0	0	2	2	5	6	3	3	1	0	1	1	3	2	1	1
C9J6G3;C9J7M1;A0A024R3W4;O95749	C9J6G3;C9J7M1;A0A024R3W4;O95749	3;3;3;3	3;3;3;3	3;3;3;3	Geranylgeranyl pyrophosphate synthase	GGPS1	>tr|C9J6G3|C9J6G3_HUMAN Geranylgeranyl pyrophosphate synthase (Fragment) OS=Homo sapiens GN=GGPS1 PE=1 SV=1;>tr|C9J7M1|C9J7M1_HUMAN Geranylgeranyl pyrophosphate synthase (Fragment) OS=Homo sapiens GN=GGPS1 PE=1 SV=1;>tr|A0A024R3W4|A0A024R3W4_HUMAN Geranylg	4	3	3	3	0	0	2	2	3	3	0	0	1	1	1	0	2	2	0	0	2	3	1	1	3	2	0	0	2	2	3	3	0	0	1	1	1	0	2	2	0	0
A0A024R3W7;P24534;C9JZW3;A4D1M6;F8WF65;F2Z2G2	A0A024R3W7;P24534;C9JZW3;A4D1M6	4;4;2;2;1;1	3;3;2;1;1;1	3;3;2;1;1;1	Elongation factor 1-beta	EEF1B2;LOC392793	>tr|A0A024R3W7|A0A024R3W7_HUMAN Eukaryotic translation elongation factor 1 beta 2, isoform CRA_a OS=Homo sapiens GN=EEF1B2 PE=3 SV=1;>sp|P24534|EF1B_HUMAN Elongation factor 1-beta OS=Homo sapiens GN=EEF1B2 PE=1 SV=3;>tr|C9JZW3|C9JZW3_HUMAN Elongation facto	6	4	3	3	0	0	1	1	1	1	0	0	3	3	0	0	4	3	1	1	2	1	1	1	2	2	0	0	0	0	1	1	0	0	2	2	0	0	3	2	0	0
Q6FHH6;Q53TN2;A0A024R3Z5;O43813;E9PHS0;B4DGM7;F8WDS9;H7C2E3	Q6FHH6;Q53TN2;A0A024R3Z5;O43813;E9PHS0	15;15;15;15;11;6;5;1	15;15;15;15;11;6;5;1	2;2;2;2;0;0;0;0	LanC-like protein 1	LANCL1	>tr|Q6FHH6|Q6FHH6_HUMAN LANCL1 protein (Fragment) OS=Homo sapiens GN=LANCL1 PE=2 SV=1;>tr|Q53TN2|Q53TN2_HUMAN LanC lantibiotic synthetase component C-like 1 (Bacterial), isoform CRA_a OS=Homo sapiens GN=LANCL1 PE=4 SV=1;>tr|A0A024R3Z5|A0A024R3Z5_HUMAN LanC	8	15	15	2	2	2	9	10	8	7	0	1	3	3	2	2	7	8	4	2	5	5	9	10	7	8	2	2	9	10	8	7	0	1	3	3	2	2	7	8	4	2
A0A024R3Z6;Q7L1Q6;Q53FN7;D3DN77;C9IZ80;B3KU41;C9JFN4;C9J188;C9JWF5;H0Y503;C9JV57;Q3LIC9	A0A024R3Z6;Q7L1Q6;Q53FN7;D3DN77;C9IZ80;B3KU41	16;16;15;11;11;9;7;5;5;3;2;1	16;16;15;11;11;9;7;5;5;3;2;1	15;15;14;10;11;9;7;5;5;3;2;1	Basic leucine zipper and W2 domain-containing protein 1	BZW1;hCG_2022736	>tr|A0A024R3Z6|A0A024R3Z6_HUMAN Basic leucine zipper and W2 domains 1, isoform CRA_a OS=Homo sapiens GN=BZW1 PE=4 SV=1;>sp|Q7L1Q6|BZW1_HUMAN Basic leucine zipper and W2 domain-containing protein 1 OS=Homo sapiens GN=BZW1 PE=1 SV=1;>tr|Q53FN7|Q53FN7_HUMAN B	12	16	16	15	5	5	10	10	8	9	5	3	4	4	1	1	9	10	3	3	5	4	9	7	10	10	5	5	10	10	8	9	5	3	4	4	1	1	9	10	3	3
C9JTS3;Q59EM1;C9JG97;A0A024R410;C9JEH3;Q13685	C9JTS3;Q59EM1;C9JG97;A0A024R410;C9JEH3;Q13685	2;2;2;2;2;2	2;2;2;2;2;2	2;2;2;2;2;2	Angio-associated migratory cell protein	AAMP	>tr|C9JTS3|C9JTS3_HUMAN Angio-associated migratory cell protein (Fragment) OS=Homo sapiens GN=AAMP PE=1 SV=8;>tr|Q59EM1|Q59EM1_HUMAN Angio-associated, migratory cell protein variant (Fragment) OS=Homo sapiens PE=2 SV=1;>tr|C9JG97|C9JG97_HUMAN Angio-associa	6	2	2	2	0	0	0	0	0	1	1	0	0	0	0	0	0	0	0	0	0	0	0	0	0	0	0	0	0	0	0	1	1	0	0	0	0	0	0	0	0	0
H7C270;A0A024R414;A0A024R461;H7C1Z7;Q9GZU7;H7C2S4;A0A024R2L8;O15194	H7C270;A0A024R414;A0A024R461;H7C1Z7;Q9GZU7;H7C2S4;A0A024R2L8;O15194	2;2;2;2;2;1;1;1	2;2;2;2;2;1;1;1	2;2;2;2;2;1;1;1	Carboxy-terminal domain RNA polymerase II polypeptide A small phosphatase 1;CTD small phosphatase-like protein	CTDSP1;CTDSPL	>tr|H7C270|H7C270_HUMAN Carboxy-terminal domain RNA polymerase II polypeptide A small phosphatase 1 (Fragment) OS=Homo sapiens GN=CTDSP1 PE=1 SV=1;>tr|A0A024R414|A0A024R414_HUMAN CTD (Carboxy-terminal domain, RNA polymerase II, polypeptide A) small phospha	8	2	2	2	0	0	0	0	1	1	0	0	0	0	0	0	1	1	1	1	0	0	2	2	0	0	0	0	0	0	1	1	0	0	0	0	0	0	1	1	1	1
A0A024R415;Q8N490	A0A024R415;Q8N490	2;2	2;2	2;2	Probable hydrolase PNKD	PNKD	>tr|A0A024R415|A0A024R415_HUMAN Paroxysmal nonkinesiogenic dyskinesia, isoform CRA_a OS=Homo sapiens GN=PNKD PE=3 SV=1;>sp|Q8N490|PNKD_HUMAN Probable hydrolase PNKD OS=Homo sapiens GN=PNKD PE=1 SV=2	2	2	2	2	0	0	1	1	1	1	0	0	0	0	0	0	1	1	0	0	1	1	1	1	0	0	0	0	1	1	1	1	0	0	0	0	0	0	1	1	0	0
A0A024R433;P24593;C9JXX4	A0A024R433;P24593;C9JXX4	5;5;4	5;5;4	5;5;4	Insulin-like growth factor-binding protein 5	IGFBP5	>tr|A0A024R433|A0A024R433_HUMAN Insulin-like growth factor binding protein 5, isoform CRA_a OS=Homo sapiens GN=IGFBP5 PE=4 SV=1;>sp|P24593|IBP5_HUMAN Insulin-like growth factor-binding protein 5 OS=Homo sapiens GN=IGFBP5 PE=1 SV=1;>tr|C9JXX4|C9JXX4_HUMAN I	3	5	5	5	1	2	1	1	4	3	1	1	1	0	0	0	3	3	1	1	1	1	0	0	4	3	1	2	1	1	4	3	1	1	1	0	0	0	3	3	1	1
A0A024R436;H7BXK9;Q9NP58	A0A024R436;H7BXK9;Q9NP58	2;2;2	2;2;2	2;2;2	ATP-binding cassette sub-family B member 6, mitochondrial	ABCB6	>tr|A0A024R436|A0A024R436_HUMAN ATP-binding cassette, sub-family B (MDR/TAP), member 6, isoform CRA_f OS=Homo sapiens GN=ABCB6 PE=4 SV=1;>tr|H7BXK9|H7BXK9_HUMAN ATP-binding cassette sub-family B member 6, mitochondrial (Fragment) OS=Homo sapiens GN=ABCB6 P	3	2	2	2	0	0	0	0	1	1	0	0	0	0	0	0	1	1	0	0	0	0	0	0	0	0	0	0	0	0	1	1	0	0	0	0	0	0	1	1	0	0
B4DYN3;B3KPP7;A8K140;A0A024R438;Q7Z3C6;C9JD65	B4DYN3;B3KPP7;A8K140;A0A024R438;Q7Z3C6;C9JD65	2;2;2;2;2;1	2;2;2;2;2;1	2;2;2;2;2;1	Autophagy-related protein 9A	ATG9A	>tr|B4DYN3|B4DYN3_HUMAN cDNA FLJ55634, highly similar to Autophagy-related protein 9A OS=Homo sapiens PE=2 SV=1;>tr|B3KPP7|B3KPP7_HUMAN cDNA FLJ32033 fis, clone NTONG2000265, highly similar to Autophagy-related protein 9A OS=Homo sapiens PE=2 SV=1;>tr|A8K1	6	2	2	2	0	0	0	0	1	1	0	0	0	0	0	0	0	0	0	0	0	0	0	0	0	0	0	0	0	0	1	1	0	0	0	0	0	0	0	0	0	0
A0A024R442;Q53SB6;E7ETB3;Q9ULA0;B7Z7F0;A0A024R443;Q9BSS9;E7EMB6;Q9NV55;C9JBE1;Q9HAC6;F8WAN0;B7Z822;B9ZVU2;E7EPX3;C9J1E2;E5RJ35;C9JRG3	A0A024R442;Q53SB6;E7ETB3;Q9ULA0;B7Z7F0;A0A024R443;Q9BSS9;E7EMB6;Q9NV55;C9JBE1	18;18;18;18;17;16;15;15;14;9;8;8;8;7;6;4;3;3	18;18;18;18;17;16;15;15;14;9;8;8;8;7;6;4;3;3	18;18;18;18;17;16;15;15;14;9;8;8;8;7;6;4;3;3	Aspartyl aminopeptidase	DNPEP	>tr|A0A024R442|A0A024R442_HUMAN Aspartyl aminopeptidase, isoform CRA_b OS=Homo sapiens GN=DNPEP PE=3 SV=1;>tr|Q53SB6|Q53SB6_HUMAN Putative uncharacterized protein DNPEP OS=Homo sapiens GN=DNPEP PE=3 SV=1;>tr|E7ETB3|E7ETB3_HUMAN Aspartyl aminopeptidase OS=H	18	18	18	18	2	2	7	7	15	15	5	5	8	8	1	1	6	6	3	4	4	4	6	6	7	7	2	2	7	7	15	15	5	5	8	8	1	1	6	6	3	4
Q53GQ2;A0A024R471;Q9H9Q2;J3KQ34;J3KQ41;A0A087X1P5;J3KQV6;J3QT67;J3QT66;J3QT69;J3QT50;J3QT43;J3QT95;B3KW51;B3KV02;A0A024R478;J3QT73	Q53GQ2;A0A024R471;Q9H9Q2;J3KQ34;J3KQ41;A0A087X1P5	4;4;4;3;3;2;1;1;1;1;1;1;1;1;1;1;1	4;4;4;3;3;2;1;1;1;1;1;1;1;1;1;1;1	4;4;4;3;3;2;1;1;1;1;1;1;1;1;1;1;1	COP9 signalosome complex subunit 7b	COPS7B	>tr|Q53GQ2|Q53GQ2_HUMAN COP9 constitutive photomorphogenic homolog subunit 7B variant (Fragment) OS=Homo sapiens PE=2 SV=1;>tr|A0A024R471|A0A024R471_HUMAN COP9 constitutive photomorphogenic homolog subunit 7B (Arabidopsis), isoform CRA_b OS=Homo sapiens GN	17	4	4	4	0	0	1	1	2	3	1	1	0	1	0	0	0	0	0	0	0	0	1	1	2	2	0	0	1	1	2	3	1	1	0	1	0	0	0	0	0	0
Q1MW40;A0A024R472;Q969X1;C9JEN3;C9IYT2;F8WDY4;C9IZ27;C9JW19;C9JWV9;B4DUD2;B4DNZ1;C9JM62;C9JAK9;C9JN47;C9JI44;C9JDV0;C9JAP5;B3KSM0	Q1MW40;A0A024R472;Q969X1;C9JEN3;C9IYT2;F8WDY4;C9IZ27;C9JW19;C9JWV9;B4DUD2;B4DNZ1	6;6;6;5;5;5;5;5;5;5;5;1;1;1;1;1;1;1	6;6;6;5;5;5;5;5;5;5;5;1;1;1;1;1;1;1	6;6;6;5;5;5;5;5;5;5;5;1;1;1;1;1;1;1	Protein lifeguard 3	RECS1;TMBIM1	>tr|Q1MW40|Q1MW40_HUMAN Responsive to centrifugal force and shear stress gene 1 OS=Homo sapiens GN=RECS1 PE=2 SV=1;>tr|A0A024R472|A0A024R472_HUMAN Transmembrane BAX inhibitor motif containing 1, isoform CRA_a OS=Homo sapiens GN=TMBIM1 PE=3 SV=1;>sp|Q969X1|	18	6	6	6	3	3	3	3	5	5	2	2	3	3	1	1	4	5	1	2	3	2	3	3	3	3	3	3	3	3	5	5	2	2	3	3	1	1	4	5	1	2
Q53S54;A0A024R475;Q13618;B7Z600;A0A087WTG3;H7C1L6;A0A087X1R9;H7C399	Q53S54;A0A024R475;Q13618;B7Z600	31;31;31;24;12;6;4;3	31;31;31;24;12;6;4;3	31;31;31;24;12;6;4;3	Cullin-3	CUL3	>tr|Q53S54|Q53S54_HUMAN Putative uncharacterized protein CUL3 (Fragment) OS=Homo sapiens GN=CUL3 PE=3 SV=1;>tr|A0A024R475|A0A024R475_HUMAN Cullin 3, isoform CRA_a OS=Homo sapiens GN=CUL3 PE=3 SV=1;>sp|Q13618|CUL3_HUMAN Cullin-3 OS=Homo sapiens GN=CUL3 PE=1	8	31	31	31	2	4	3	2	22	22	2	2	7	8	1	2	14	14	3	4	1	0	1	1	0	1	2	4	3	2	22	22	2	2	7	8	1	2	14	14	3	4
A0A024R482;Q96IJ6;A0A087WUI8;F8WD54;C9JAH0;C9J255;Q59F69;A0A0U1RRC2;B4DJR0	A0A024R482;Q96IJ6;A0A087WUI8;F8WD54;C9JAH0	19;19;15;12;10;6;5;4;2	19;19;15;12;10;6;5;4;2	19;19;15;12;10;6;5;4;2	Mannose-1-phosphate guanyltransferase alpha	GMPPA	>tr|A0A024R482|A0A024R482_HUMAN GDP-mannose pyrophosphorylase A, isoform CRA_a OS=Homo sapiens GN=GMPPA PE=4 SV=1;>sp|Q96IJ6|GMPPA_HUMAN Mannose-1-phosphate guanyltransferase alpha OS=Homo sapiens GN=GMPPA PE=1 SV=1;>tr|A0A087WUI8|A0A087WUI8_HUMAN Mannose-	9	19	19	19	9	9	9	10	10	10	1	1	6	7	1	1	11	10	4	4	7	7	7	6	8	9	9	9	9	10	10	10	1	1	6	7	1	1	11	10	4	4
Q9H8N9;A0A024R488;Q8IWB7;C9JJ54	Q9H8N9;A0A024R488;Q8IWB7;C9JJ54	6;6;6;4	6;6;6;4	6;6;6;4	WD repeat and FYVE domain-containing protein 1	WDFY1	>tr|Q9H8N9|Q9H8N9_HUMAN cDNA FLJ13353 fis, clone OVARC1002182, weakly similar to BETA-TRCP (BETA-TRANSDUCIN REPEAT-CONTAINING PROTEIN) OS=Homo sapiens PE=2 SV=1;>tr|A0A024R488|A0A024R488_HUMAN WD repeat and FYVE domain containing 1, isoform CRA_a OS=Homo s	4	6	6	6	2	1	3	3	4	5	2	2	1	2	1	1	3	4	3	3	2	2	1	2	2	2	2	1	3	3	4	5	2	2	1	2	1	1	3	4	3	3
B7ZLM5;Q17RG0;L7UQD0;A5YM60;A0A024R494;E7EVC7;Q676U5;Q53SV2;Q9H7M5;Q9NWG8;A0A024R4B6;C9J1B2;C9J8C6;C9JAY7;C9JK97;Q8TCI4	B7ZLM5;Q17RG0;L7UQD0;A5YM60;A0A024R494;E7EVC7;Q676U5;Q53SV2;Q9H7M5;Q9NWG8;A0A024R4B6	5;5;5;5;5;5;5;4;3;3;3;2;1;1;1;1	5;5;5;5;5;5;5;4;3;3;3;2;1;1;1;1	5;5;5;5;5;5;5;4;3;3;3;2;1;1;1;1	Autophagy-related protein 16-1	ATG16L1;FLJ10035;FLJ00045	>tr|B7ZLM5|B7ZLM5_HUMAN ATG16L1 protein (Fragment) OS=Homo sapiens GN=ATG16L1 PE=2 SV=1;>tr|Q17RG0|Q17RG0_HUMAN ATG16L1 protein (Fragment) OS=Homo sapiens GN=ATG16L1 PE=2 SV=1;>tr|L7UQD0|L7UQD0_HUMAN Autophagy-related protein 16-1 isoform 2 OS=Homo sapiens	16	5	5	5	0	0	1	1	2	1	1	1	0	0	0	0	0	0	1	1	0	0	0	0	0	0	0	0	1	1	2	1	1	1	0	0	0	0	0	0	1	1
A0A024R496;Q9Y376;A0A087X0K1;Q7Z4X0;Q53RN7	A0A024R496;Q9Y376;A0A087X0K1;Q7Z4X0	19;19;17;17;1	19;19;17;17;1	16;16;14;14;1	Calcium-binding protein 39	CAB39	>tr|A0A024R496|A0A024R496_HUMAN Calcium binding protein 39, isoform CRA_a OS=Homo sapiens GN=CAB39 PE=4 SV=1;>sp|Q9Y376|CAB39_HUMAN Calcium-binding protein 39 OS=Homo sapiens GN=CAB39 PE=1 SV=1;>tr|A0A087X0K1|A0A087X0K1_HUMAN Calcium-binding protein 39 OS=	5	19	19	16	6	7	11	11	15	16	6	6	7	9	4	6	12	13	8	8	8	9	12	11	10	9	6	7	11	11	15	16	6	6	7	9	4	6	12	13	8	8
Q96BA2;A0A024R4B2;O00506;B4E185;A0A0S2Z4Y2;B4DVS7;H7C279;Q5CZ67;B4DMA5;B3KRS6;C9J6L2;C9JCC0;C9J232;C9JDH9;C9JFA1;A0A0S2Z503;C9JN58;E7EM58;B4DZ52	Q96BA2;A0A024R4B2;O00506;B4E185;A0A0S2Z4Y2;B4DVS7;H7C279;Q5CZ67;B4DMA5;B3KRS6;C9J6L2;C9JCC0;C9J232;C9JDH9	10;10;10;9;9;9;8;8;8;8;7;7;7;6;1;1;1;1;1	5;5;5;4;4;4;3;3;3;4;2;2;2;2;1;1;1;1;1	3;3;3;2;2;2;1;1;2;2;0;0;0;0;1;1;1;1;1	Serine/threonine-protein kinase 25	STK25;DKFZp686J1430	>tr|Q96BA2|Q96BA2_HUMAN STK25 protein OS=Homo sapiens PE=1 SV=1;>tr|A0A024R4B2|A0A024R4B2_HUMAN Serine/threonine kinase 25 (STE20 homolog, yeast), isoform CRA_a OS=Homo sapiens GN=STK25 PE=2 SV=1;>sp|O00506|STK25_HUMAN Serine/threonine-protein kinase 25 OS	19	10	5	3	1	0	1	1	2	2	4	4	3	2	1	1	6	8	2	2	2	4	7	7	4	4	0	0	0	0	0	0	1	1	1	0	0	0	4	5	1	1
E9PGT6;B2R8N1;A0A024R4D1;Q99627;H7C3S9;B4DFF9	E9PGT6;B2R8N1;A0A024R4D1;Q99627;H7C3S9;B4DFF9	2;2;2;2;1;1	2;2;2;2;1;1	2;2;2;2;1;1	COP9 signalosome complex subunit 8	COPS8	>tr|E9PGT6|E9PGT6_HUMAN COP9 signalosome complex subunit 8 OS=Homo sapiens GN=COPS8 PE=1 SV=1;>tr|B2R8N1|B2R8N1_HUMAN cDNA, FLJ93976, highly similar to Homo sapiens COP9 homolog (COP9), mRNA OS=Homo sapiens PE=2 SV=1;>tr|A0A024R4D1|A0A024R4D1_HUMAN COP9 co	6	2	2	2	0	0	0	0	0	0	1	1	1	1	0	0	0	0	0	0	0	0	0	0	0	0	0	0	0	0	0	0	1	1	1	1	0	0	0	0	0	0
A0A024R4D3;A8KA64;Q6UWC1;Q53QF3;Q53QV8;H7C3K9;H7C052;C9JKV5;H7C190;H7C2D8;C9JI01	A0A024R4D3;A8KA64;Q6UWC1;Q53QF3	31;30;20;16;14;14;11;10;8;8;5	31;30;20;16;14;14;11;10;8;8;5	1;1;1;0;0;0;0;0;0;1;0		MLPH;UNQ8200	>tr|A0A024R4D3|A0A024R4D3_HUMAN Melanophilin, isoform CRA_b OS=Homo sapiens GN=MLPH PE=4 SV=1;>tr|A8KA64|A8KA64_HUMAN cDNA FLJ77561, highly similar to Homo sapiens melanophilin, mRNA OS=Homo sapiens PE=2 SV=1;>tr|Q6UWC1|Q6UWC1_HUMAN DRLV8200 OS=Homo sapien	11	31	31	1	14	15	20	20	18	18	13	12	20	20	7	8	19	19	16	17	16	17	22	21	21	22	14	15	20	20	18	18	13	12	20	20	7	8	19	19	16	17
A0A024R4E5;Q00341;B2R5V9;H0Y394;B4DKR8;Q6ZS03;Q96CF6;H7C0A4;C9J5E5;C9JIZ1;C9JZI8;Q6ZN49;Q2HJC8;C9JHS7;C9JHZ8;C9JES8;Q5HYC5;H7BZC3;H7C2D1;C9JT62;C9JK79;C9JMQ6;C9JQ82;C9JBS3;C9JEJ8;C9JHN6	A0A024R4E5;Q00341;B2R5V9;H0Y394;B4DKR8;Q6ZS03;Q96CF6	22;22;21;15;14;12;11;8;7;7;6;6;6;5;5;5;5;4;4;2;2;1;1;1;1;1	22;22;21;15;14;12;11;8;7;7;6;6;6;5;5;5;5;4;4;2;2;1;1;1;1;1	22;22;21;15;14;12;11;8;7;7;6;6;6;5;5;5;5;4;4;2;2;1;1;1;1;1	Vigilin	HDLBP	>tr|A0A024R4E5|A0A024R4E5_HUMAN High density lipoprotein binding protein (Vigilin), isoform CRA_a OS=Homo sapiens GN=HDLBP PE=1 SV=1;>sp|Q00341|VIGLN_HUMAN Vigilin OS=Homo sapiens GN=HDLBP PE=1 SV=2;>tr|B2R5V9|B2R5V9_HUMAN cDNA, FLJ92652, highly similar to	26	22	22	22	3	2	5	4	4	5	4	6	9	9	0	0	9	9	7	6	4	3	7	7	8	10	3	2	5	4	4	5	4	6	9	9	0	0	9	9	7	6
A0A024R4F1;P06733;E2DRY6;K7EM90;A4UCS8;A4QMW8;P13929;E5RI09;E5RG95;K7EPM1;K7EKN2;E5RGZ4;F5H0C8;D3DTL4;F5H1C3;L0R6S1;Q9NPL4;B4DUJ6	A0A024R4F1;P06733;E2DRY6;K7EM90	27;27;18;14;10;7;3;2;2;2;2;2;2;2;1;1;1;1	27;27;18;14;10;7;3;2;2;2;2;2;2;2;1;1;1;1	20;20;15;9;6;6;0;0;0;0;0;0;0;0;0;1;0;0	Alpha-enolase;Enolase	ENO1	>tr|A0A024R4F1|A0A024R4F1_HUMAN Enolase 1, (Alpha), isoform CRA_a OS=Homo sapiens GN=ENO1 PE=2 SV=1;>sp|P06733|ENOA_HUMAN Alpha-enolase OS=Homo sapiens GN=ENO1 PE=1 SV=2;>tr|E2DRY6|E2DRY6_HUMAN C-myc promoter-binding protein 1 OS=Homo sapiens PE=2 SV=1;>tr	18	27	27	20	11	15	12	12	20	20	10	8	12	12	10	11	19	17	11	14	12	12	15	15	17	20	11	15	12	12	20	20	10	8	12	12	10	11	19	17	11	14
A0A024R4G1;Q8N1G4;J3KRP5	A0A024R4G1;Q8N1G4	17;17;1	17;17;1	17;17;1	Leucine-rich repeat-containing protein 47	LRRC47	>tr|A0A024R4G1|A0A024R4G1_HUMAN Leucine rich repeat containing 47, isoform CRA_a OS=Homo sapiens GN=LRRC47 PE=4 SV=1;>sp|Q8N1G4|LRC47_HUMAN Leucine-rich repeat-containing protein 47 OS=Homo sapiens GN=LRRC47 PE=1 SV=1	3	17	17	17	5	5	3	3	7	7	9	9	7	7	1	1	8	8	6	7	5	6	5	6	6	7	5	5	3	3	7	7	9	9	7	7	1	1	8	8	6	7
A0A024R4H0;Q02809;B2R5M9;B4DHT1;Q5JXB7;Q5JXB8	A0A024R4H0;Q02809;B2R5M9	38;38;36;15;9;5	38;38;36;15;9;5	1;1;1;0;0;0	Procollagen-lysine,2-oxoglutarate 5-dioxygenase 1	PLOD1	>tr|A0A024R4H0|A0A024R4H0_HUMAN Procollagen-lysine 1, 2-oxoglutarate 5-dioxygenase 1, isoform CRA_a OS=Homo sapiens GN=PLOD1 PE=4 SV=1;>sp|Q02809|PLOD1_HUMAN Procollagen-lysine,2-oxoglutarate 5-dioxygenase 1 OS=Homo sapiens GN=PLOD1 PE=1 SV=2;>tr|B2R5M9|B2	6	38	38	1	16	17	23	23	30	30	11	12	16	17	15	17	26	24	8	9	21	20	20	21	21	23	16	17	23	23	30	30	11	12	16	17	15	17	26	24	8	9
A0A024R4I7;Q8WZA0	A0A024R4I7;Q8WZA0	3;3	3;3	1;1	Protein LZIC	LZIC	>tr|A0A024R4I7|A0A024R4I7_HUMAN Leucine zipper and CTNNBIP1 domain containing, isoform CRA_a OS=Homo sapiens GN=LZIC PE=4 SV=1;>sp|Q8WZA0|LZIC_HUMAN Protein LZIC OS=Homo sapiens GN=LZIC PE=1 SV=1	2	3	3	1	0	0	0	1	0	0	0	0	0	0	0	0	1	1	0	1	0	0	0	0	1	1	0	0	0	1	0	0	0	0	0	0	0	0	1	1	0	1
A0A024R4J4;P20151;A0A024R4N3;B4DU77;Q6T775;A0A075B7A6;M0R1T3;M0QXQ7;M0R0M4;M0R0M2;B0AZU9	A0A024R4J4;P20151;A0A024R4N3;B4DU77;Q6T775	10;10;8;7;5;3;2;2;1;1;1	9;9;7;7;4;3;1;1;1;1;1	9;9;7;7;4;3;1;1;1;1;1	Kallikrein-2	KLK2	>tr|A0A024R4J4|A0A024R4J4_HUMAN Kallikrein 2, prostatic, isoform CRA_a OS=Homo sapiens GN=KLK2 PE=3 SV=1;>sp|P20151|KLK2_HUMAN Kallikrein-2 OS=Homo sapiens GN=KLK2 PE=1 SV=1;>tr|A0A024R4N3|A0A024R4N3_HUMAN Kallikrein 2, prostatic, isoform CRA_b OS=Homo sap	11	10	9	9	7	7	6	6	8	7	4	4	7	8	2	3	7	7	4	5	7	7	8	8	8	8	6	6	5	5	7	6	4	4	6	7	2	3	6	6	4	5
A0A024R4M0;P46781;B5MCT8;C9JM19;B7Z732;A5D904;F2Z3C0;A8MXK4	A0A024R4M0;P46781;B5MCT8;C9JM19;B7Z732;A5D904	16;16;14;14;14;13;3;3	16;16;14;14;14;13;3;3	16;16;14;14;14;13;3;3	40S ribosomal protein S9	RPS9	>tr|A0A024R4M0|A0A024R4M0_HUMAN 40S ribosomal protein S9 OS=Homo sapiens GN=RPS9 PE=1 SV=1;>sp|P46781|RS9_HUMAN 40S ribosomal protein S9 OS=Homo sapiens GN=RPS9 PE=1 SV=3;>tr|B5MCT8|B5MCT8_HUMAN 40S ribosomal protein S9 OS=Homo sapiens GN=RPS9 PE=1 SV=1;>t	8	16	16	16	8	7	8	7	12	11	3	3	12	11	0	0	9	9	4	3	5	5	7	7	6	6	8	7	8	7	12	11	3	3	12	11	0	0	9	9	4	3
M0R0F0;Q53G25;A0A024R4Q8;M0R0R2;P46782;M0QZN2;Q59EK8	M0R0F0;Q53G25;A0A024R4Q8;M0R0R2;P46782;M0QZN2	7;7;7;7;7;4;2	7;7;7;7;7;4;2	7;7;7;7;7;4;2	40S ribosomal protein S5;40S ribosomal protein S5, N-terminally processed	RPS5	>tr|M0R0F0|M0R0F0_HUMAN 40S ribosomal protein S5 (Fragment) OS=Homo sapiens GN=RPS5 PE=1 SV=1;>tr|Q53G25|Q53G25_HUMAN Ribosomal protein S5 variant (Fragment) OS=Homo sapiens PE=2 SV=1;>tr|A0A024R4Q8|A0A024R4Q8_HUMAN Ribosomal protein S5, isoform CRA_a OS=H	7	7	7	7	2	2	3	3	4	5	1	1	2	3	1	1	3	3	1	1	2	2	3	2	2	1	2	2	3	3	4	5	1	1	2	3	1	1	3	3	1	1
M0R1L7;A0A024R4S0;O43633;M0R1T5;M0QXX8	M0R1L7;A0A024R4S0;O43633;M0R1T5	7;7;7;6;1	7;7;7;6;1	7;7;7;6;1	Charged multivesicular body protein 2a	CHMP2A	>tr|M0R1L7|M0R1L7_HUMAN Charged multivesicular body protein 2a (Fragment) OS=Homo sapiens GN=CHMP2A PE=1 SV=1;>tr|A0A024R4S0|A0A024R4S0_HUMAN Chromatin modifying protein 2A, isoform CRA_b OS=Homo sapiens GN=CHMP2A PE=3 SV=1;>sp|O43633|CHM2A_HUMAN Charged m	5	7	7	7	2	2	1	1	6	6	1	1	3	4	1	1	2	2	0	0	2	2	5	3	4	4	2	2	1	1	6	6	1	1	3	4	1	1	2	2	0	0
A0A024R4S1;Q9Y6I3;B4DU91;D6R907;D6RBI9;D6RBR6	A0A024R4S1;Q9Y6I3;B4DU91	4;4;3;1;1;1	4;4;3;1;1;1	3;3;3;0;0;0	Epsin-1	EPN1	>tr|A0A024R4S1|A0A024R4S1_HUMAN Epsin 1, isoform CRA_a OS=Homo sapiens GN=EPN1 PE=4 SV=1;>sp|Q9Y6I3|EPN1_HUMAN Epsin-1 OS=Homo sapiens GN=EPN1 PE=1 SV=2;>tr|B4DU91|B4DU91_HUMAN cDNA FLJ55368, highly similar to Epsin-1 OS=Homo sapiens PE=2 SV=1	6	4	4	3	1	1	1	1	0	2	2	2	1	1	0	0	1	2	1	1	1	1	2	2	3	3	1	1	1	1	0	2	2	2	1	1	0	0	1	2	1	1
A0A024R4T4;P61081;M0QX69;M0QYI6	A0A024R4T4;P61081	7;7;2;2	7;7;2;2	7;7;2;2	NEDD8-conjugating enzyme Ubc12	UBE2M	>tr|A0A024R4T4|A0A024R4T4_HUMAN Ubiquitin-conjugating enzyme E2M (UBC12 homolog, yeast), isoform CRA_a OS=Homo sapiens GN=UBE2M PE=3 SV=1;>sp|P61081|UBC12_HUMAN NEDD8-conjugating enzyme Ubc12 OS=Homo sapiens GN=UBE2M PE=1 SV=1	4	7	7	7	1	2	3	1	2	3	2	2	1	2	1	1	4	3	1	1	2	0	2	2	0	1	1	2	3	1	2	3	2	2	1	2	1	1	4	3	1	1
A0A024R4U0;Q9NP61;B7Z6L2;B0QYV8;B7Z4Q0;B0QYV9;E9PMR9;E9PM63;E9PNY8;H0YDX1;E9PMU9;E9PJT7;E9PK28;E9PN48;B7Z6H9;H0Y6A0;E9PQP3;E9PIY6;B3KV00;A0A0D9SF70;G5E9L0;Q8N6H7	A0A024R4U0;Q9NP61;B7Z6L2;B0QYV8;B7Z4Q0	5;5;4;3;3;2;1;1;1;1;1;1;1;1;1;1;1;1;1;1;1;1	5;5;4;3;3;2;1;1;1;1;1;1;1;1;1;1;1;1;1;1;1;1	5;5;4;3;3;2;1;1;1;1;1;1;1;1;1;1;1;1;1;1;1;1	ADP-ribosylation factor GTPase-activating protein 3	ARFGAP3	>tr|A0A024R4U0|A0A024R4U0_HUMAN ADP-ribosylation factor GTPase activating protein 3, isoform CRA_a OS=Homo sapiens GN=ARFGAP3 PE=4 SV=1;>sp|Q9NP61|ARFG3_HUMAN ADP-ribosylation factor GTPase-activating protein 3 OS=Homo sapiens GN=ARFGAP3 PE=1 SV=1;>tr|B7Z6	22	5	5	5	1	1	1	1	1	1	0	0	1	1	1	1	3	2	1	1	2	2	3	2	2	4	1	1	1	1	1	1	0	0	1	1	1	1	3	2	1	1
A0A024R4U3;Q14166;Q9BR23;V9GY16	A0A024R4U3;Q14166	27;27;5;2	27;27;5;2	27;27;5;2	Tubulin--tyrosine ligase-like protein 12	TTLL12	>tr|A0A024R4U3|A0A024R4U3_HUMAN Tubulin tyrosine ligase-like family, member 12, isoform CRA_a OS=Homo sapiens GN=TTLL12 PE=4 SV=1;>sp|Q14166|TTL12_HUMAN Tubulin--tyrosine ligase-like protein 12 OS=Homo sapiens GN=TTLL12 PE=1 SV=2	4	27	27	27	4	4	10	10	20	20	8	9	9	9	2	2	8	8	6	7	5	6	8	10	8	7	4	4	10	10	20	20	8	9	9	9	2	2	8	8	6	7
A2RRE8;Q53FV7;A8K5K1;A5PLL0;A0A024R4W7;Q92523	A2RRE8;Q53FV7;A8K5K1;A5PLL0;A0A024R4W7;Q92523	4;4;4;4;4;4	4;4;4;4;4;4	4;4;4;4;4;4	Carnitine O-palmitoyltransferase 1, muscle isoform	CPT1B;hCG_2044796	>tr|A2RRE8|A2RRE8_HUMAN CPT1B protein OS=Homo sapiens GN=CPT1B PE=2 SV=1;>tr|Q53FV7|Q53FV7_HUMAN Carnitine palmitoyltransferase 1B isoform a variant (Fragment) OS=Homo sapiens PE=2 SV=1;>tr|A8K5K1|A8K5K1_HUMAN cDNA FLJ76296, highly similar to Homo sapiens	6	4	4	4	0	0	0	0	3	4	0	0	0	0	0	0	0	0	0	0	0	0	0	0	0	0	0	0	0	0	3	4	0	0	0	0	0	0	0	0	0	0
A0A024R4X0;P00387;Q6ZVI6;B1AHF3	A0A024R4X0;P00387;Q6ZVI6;B1AHF3	6;6;4;3	6;6;4;3	6;6;4;3	NADH-cytochrome b5 reductase 3;NADH-cytochrome b5 reductase 3 membrane-bound form;NADH-cytochrome b5 reductase 3 soluble form	CYB5R3	>tr|A0A024R4X0|A0A024R4X0_HUMAN NADH-cytochrome b5 reductase OS=Homo sapiens GN=CYB5R3 PE=3 SV=1;>sp|P00387|NB5R3_HUMAN NADH-cytochrome b5 reductase 3 OS=Homo sapiens GN=CYB5R3 PE=1 SV=3;>tr|Q6ZVI6|Q6ZVI6_HUMAN NADH-cytochrome b5 reductase OS=Homo sapiens	4	6	6	6	2	2	2	3	3	3	3	2	3	3	1	1	4	3	1	1	1	1	2	2	1	1	2	2	2	3	3	3	3	2	3	3	1	1	4	3	1	1
A0A024R4X4;Q9Y259;B7Z756	A0A024R4X4;Q9Y259;B7Z756	5;5;4	5;5;4	5;5;4	Choline/ethanolamine kinase	hCG_16873;CHKB	>tr|A0A024R4X4|A0A024R4X4_HUMAN HCG16873, isoform CRA_a OS=Homo sapiens GN=hCG_16873 PE=4 SV=1;>sp|Q9Y259|CHKB_HUMAN Choline/ethanolamine kinase OS=Homo sapiens GN=CHKB PE=1 SV=3;>tr|B7Z756|B7Z756_HUMAN cDNA FLJ56256, highly similar to Choline/ethanolamine	3	5	5	5	0	0	0	0	2	1	0	0	1	1	0	0	1	1	2	2	0	0	0	0	0	0	0	0	0	0	2	1	0	0	1	1	0	0	1	1	2	2
A0A0S2Z373;Q63HL5;A0A0C4DFZ2;A0A024R509;P15289;A0A0S2Z309;B4DVI5	A0A0S2Z373;Q63HL5;A0A0C4DFZ2;A0A024R509;P15289;A0A0S2Z309;B4DVI5	9;9;9;9;9;7;5	9;9;9;9;9;7;5	9;9;9;9;9;7;5	Arylsulfatase A;Arylsulfatase A component B;Arylsulfatase A component C	DKFZp686G12235;ARSA	>tr|A0A0S2Z373|A0A0S2Z373_HUMAN Arylsulfatase A isoform 1 (Fragment) OS=Homo sapiens GN=ARSA PE=2 SV=1;>tr|Q63HL5|Q63HL5_HUMAN Putative uncharacterized protein DKFZp686G12235 OS=Homo sapiens GN=DKFZp686G12235 PE=2 SV=1;>tr|A0A0C4DFZ2|A0A0C4DFZ2_HUMAN Aryls	7	9	9	9	1	1	3	3	6	8	1	1	6	6	2	2	4	4	1	0	4	4	3	4	2	2	1	1	3	3	6	8	1	1	6	6	2	2	4	4	1	0
Q6NZ44;B3KXC3;A0A024R525;P02794;Q6NS36;G3V192;G3V1D1;E9PRK8;E9PKY7;Q8TD27;A9JQE1;E9PQR3;E9PPQ4;E9PKM5;E9PK45;D3DPG2	Q6NZ44;B3KXC3;A0A024R525;P02794;Q6NS36;G3V192;G3V1D1;E9PRK8;E9PKY7;Q8TD27	10;10;10;10;9;8;6;5;5;5;3;2;2;2;2;1	10;10;10;10;9;8;6;5;5;5;3;2;2;2;2;1	10;10;10;10;9;8;6;5;5;5;3;2;2;2;2;1	Ferritin;Ferritin heavy chain;Ferritin heavy chain, N-terminally processed	FTH1	>tr|Q6NZ44|Q6NZ44_HUMAN Ferritin OS=Homo sapiens GN=FTH1 PE=2 SV=1;>tr|B3KXC3|B3KXC3_HUMAN Ferritin OS=Homo sapiens PE=2 SV=1;>tr|A0A024R525|A0A024R525_HUMAN Ferritin OS=Homo sapiens GN=FTH1 PE=3 SV=1;>sp|P02794|FRIH_HUMAN Ferritin heavy chain OS=Homo sapi	16	10	10	10	2	1	4	4	10	10	3	3	5	4	7	7	3	3	1	1	1	1	4	4	3	3	2	1	4	4	10	10	3	3	5	4	7	7	3	3	1	1
A0A024R529;A0A140VJH7;Q3LXA3;H0YCY6;I3L252;E9PJG8;Q9UFX5;A0AUP5;E9PQR1	A0A024R529;A0A140VJH7;Q3LXA3;H0YCY6	20;19;19;18;9;8;6;4;2	20;19;19;18;9;8;6;4;2	20;19;19;18;9;8;6;4;2	Bifunctional ATP-dependent dihydroxyacetone kinase/FAD-AMP lyase (cyclizing);ATP-dependent dihydroxyacetone kinase;FAD-AMP lyase (cyclizing)	DAK	>tr|A0A024R529|A0A024R529_HUMAN Dihydroxyacetone kinase 2 homolog (Yeast), isoform CRA_a OS=Homo sapiens GN=DAK PE=4 SV=1;>tr|A0A140VJH7|A0A140VJH7_HUMAN Testis tissue sperm-binding protein Li 84P OS=Homo sapiens PE=2 SV=1;>sp|Q3LXA3|TKFC_HUMAN Triokinase/	9	20	20	20	5	5	8	8	11	12	7	7	10	10	3	2	11	11	10	10	8	8	10	9	10	10	5	5	8	8	11	12	7	7	10	10	3	2	11	11	10	10
F5GX77;A0A024R565;Q9UI30;F5GYQ2	F5GX77;A0A024R565;Q9UI30	4;4;4;1	4;4;4;1	4;4;4;1	Multifunctional methyltransferase subunit TRM112-like protein	TRMT112;HSPC152	>tr|F5GX77|F5GX77_HUMAN Multifunctional methyltransferase subunit TRM112-like protein OS=Homo sapiens GN=TRMT112 PE=1 SV=1;>tr|A0A024R565|A0A024R565_HUMAN Uncharacterized protein OS=Homo sapiens GN=HSPC152 PE=4 SV=1;>sp|Q9UI30|TR112_HUMAN Multifunctional m	4	4	4	4	0	0	1	1	2	2	1	1	0	0	0	0	2	2	0	0	0	0	1	1	1	1	0	0	1	1	2	2	1	1	0	0	0	0	2	2	0	0
B2R5U3;A0A024R571;Q9H4M9;B4DMV9;B4DR44;B4DTR4;B4DZH9;C9JC03;C9J2Z4;C9JIJ3;C9IZH1;C9JDQ8	B2R5U3;A0A024R571;Q9H4M9;B4DMV9;B4DR44;B4DTR4;B4DZH9;C9JC03;C9J2Z4	29;29;29;24;24;24;22;21;15;8;8;7	29;29;29;24;24;24;22;21;15;8;8;7	19;19;19;17;17;16;12;11;9;4;4;2	EH domain-containing protein 1	EHD1	>tr|B2R5U3|B2R5U3_HUMAN EH-domain containing 1, isoform CRA_b OS=Homo sapiens GN=EHD1 PE=2 SV=1;>tr|A0A024R571|A0A024R571_HUMAN EH domain-containing protein 1 OS=Homo sapiens GN=EHD1 PE=1 SV=1;>sp|Q9H4M9|EHD1_HUMAN EH domain-containing protein 1 OS=Homo sa	12	29	29	19	16	15	18	17	24	27	13	12	17	17	10	11	17	17	12	13	17	19	15	16	18	18	16	15	18	17	24	27	13	12	17	17	10	11	17	17	12	13
B3KR33;A0A024R573;Q7L266;A0A087WUG3;Q9BRH2;E9PJK6;A0A087WZI5;B4DLU4	B3KR33;A0A024R573;Q7L266;A0A087WUG3;Q9BRH2	9;9;9;5;5;3;3;1	9;9;9;5;5;3;3;1	9;9;9;5;5;3;3;1	Isoaspartyl peptidase/L-asparaginase;Isoaspartyl peptidase/L-asparaginase alpha chain;Isoaspartyl peptidase/L-asparaginase beta chain	ASRGL1	>tr|B3KR33|B3KR33_HUMAN cDNA FLJ33589 fis, clone BRAMY2012536, highly similar to Homo sapiens asparaginase like 1 (ASRGL1), mRNA OS=Homo sapiens PE=2 SV=1;>tr|A0A024R573|A0A024R573_HUMAN Asparaginase like 1, isoform CRA_a OS=Homo sapiens GN=ASRGL1 PE=2 SV=	8	9	9	9	2	2	1	1	6	5	5	5	2	2	3	3	3	4	1	1	1	1	2	2	1	1	2	2	1	1	6	5	5	5	2	2	3	3	3	4	1	1
A0A024R5F3;H7BXH2;E9PKF6;Q5H9R7;E9PQP7;B4E0C2;B4DTT7;B4DYU6;H0YEN2;E9PK08;B4DP39;H0YDW1;E9PNN8;Q9H880;Q7L294;H0YEV0	A0A024R5F3;H7BXH2;E9PKF6;Q5H9R7;E9PQP7;B4E0C2;B4DTT7;B4DYU6;H0YEN2	9;9;9;9;7;7;5;5;5;3;3;2;2;2;2;1	9;9;9;9;7;7;5;5;5;3;3;2;2;2;2;1	9;9;9;9;7;7;5;5;5;3;3;2;2;2;2;1	Serine/threonine-protein phosphatase 6 regulatory subunit 3	SAPS3;PPP6R3	>tr|A0A024R5F3|A0A024R5F3_HUMAN SAPS domain family, member 3, isoform CRA_c OS=Homo sapiens GN=SAPS3 PE=4 SV=1;>tr|H7BXH2|H7BXH2_HUMAN Serine/threonine-protein phosphatase 6 regulatory subunit 3 OS=Homo sapiens GN=PPP6R3 PE=1 SV=1;>tr|E9PKF6|E9PKF6_HUMAN S	16	9	9	9	0	0	4	1	2	2	2	2	2	2	0	1	3	3	1	1	0	0	1	1	1	0	0	0	4	1	2	2	2	2	2	2	0	1	3	3	1	1
Q9H3D5;Q96TF5;B2RCM5;A0A024R5G1;O95967;E9PRU1;Q6FH22;Q59GI8;H0YET5;E9PKA3;H0YEU0;E9PRQ8;H0YCR9;E9PI47	Q9H3D5;Q96TF5;B2RCM5;A0A024R5G1;O95967;E9PRU1;Q6FH22;Q59GI8	13;13;13;13;13;12;12;11;5;4;3;3;2;2	13;13;13;13;13;12;12;11;5;4;3;3;2;2	13;13;13;13;13;12;12;11;5;4;3;3;2;2	EGF-containing fibulin-like extracellular matrix protein 2	MBP1;EFEMP2	>tr|Q9H3D5|Q9H3D5_HUMAN Fibulin-like extracellular matrix protein OS=Homo sapiens PE=2 SV=1;>tr|Q96TF5|Q96TF5_HUMAN Mutant p53 binding protein 1 (MBP1) OS=Homo sapiens GN=MBP1 PE=2 SV=1;>tr|B2RCM5|B2RCM5_HUMAN cDNA, FLJ96160, highly similar to Homo sapiens	14	13	13	13	8	7	8	8	7	7	3	3	5	5	6	6	6	7	3	3	4	4	3	3	3	3	8	7	8	8	7	7	3	3	5	5	6	6	6	7	3	3
A0A024R5H0;O75531;B2R4V4;E9PJJ8	A0A024R5H0;O75531;B2R4V4	9;9;6;2	9;9;6;2	9;9;6;2	Barrier-to-autointegration factor;Barrier-to-autointegration factor, N-terminally processed	BANF1	>tr|A0A024R5H0|A0A024R5H0_HUMAN Barrier to autointegration factor 1, isoform CRA_a OS=Homo sapiens GN=BANF1 PE=4 SV=1;>sp|O75531|BAF_HUMAN Barrier-to-autointegration factor OS=Homo sapiens GN=BANF1 PE=1 SV=1;>tr|B2R4V4|B2R4V4_HUMAN cDNA, FLJ92232, highly s	4	9	9	9	6	6	5	5	7	7	5	5	4	4	5	5	7	7	5	5	6	6	6	7	7	7	6	6	5	5	7	7	5	5	4	4	5	5	7	7	5	5
A0A172Q3A8;A0A024R5H1;P15328;Q9NP04;Q6LDL1;O14597	A0A172Q3A8;A0A024R5H1;P15328;Q9NP04	4;4;4;3;1;1	4;4;4;3;1;1	4;4;4;3;1;1	Folate receptor alpha	FOLR1	>tr|A0A172Q3A8|A0A172Q3A8_HUMAN Folate receptor (Fragment) OS=Homo sapiens PE=2 SV=1;>tr|A0A024R5H1|A0A024R5H1_HUMAN Folate receptor 1 (Adult), isoform CRA_a OS=Homo sapiens GN=FOLR1 PE=4 SV=1;>sp|P15328|FOLR1_HUMAN Folate receptor alpha OS=Homo sapiens GN	6	4	4	4	1	1	0	0	0	0	2	2	0	0	1	1	0	0	0	0	0	0	1	1	0	0	1	1	0	0	0	0	2	2	0	0	1	1	0	0	0	0
A0A024R5H6;Q6VY07;B4DF77;E9PPK2;Q9NTH2;E9PNZ9;E9PSG7;H0YCU5	A0A024R5H6;Q6VY07;B4DF77	7;7;4;2;1;1;1;1	7;7;4;2;1;1;1;1	7;7;4;2;1;1;1;1	Phosphofurin acidic cluster sorting protein 1	PACS1	>tr|A0A024R5H6|A0A024R5H6_HUMAN Phosphofurin acidic cluster sorting protein 1, isoform CRA_a OS=Homo sapiens GN=PACS1 PE=4 SV=1;>sp|Q6VY07|PACS1_HUMAN Phosphofurin acidic cluster sorting protein 1 OS=Homo sapiens GN=PACS1 PE=1 SV=2;>tr|B4DF77|B4DF77_HUMAN	8	7	7	7	0	0	1	1	2	2	1	1	0	0	0	0	4	5	1	1	0	1	0	0	1	1	0	0	1	1	2	2	1	1	0	0	0	0	4	5	1	1
Q6FGX3;A0A024R5J5;A0A024R5H8;P20340;Q53ET8;B7Z5Z9;J3KR73;C9JU14;F5H3K7;C9JB90;F5GX61;Q9UL30;Q9UL29	Q6FGX3;A0A024R5J5;A0A024R5H8;P20340;Q53ET8;B7Z5Z9;J3KR73	12;12;12;12;11;10;6;5;4;3;2;1;1	12;12;12;12;11;10;6;5;4;3;2;1;1	3;3;3;3;3;3;0;0;3;0;0;0;0	Ras-related protein Rab-6A	RAB6A;RAB6B	>tr|Q6FGX3|Q6FGX3_HUMAN RAB6A protein OS=Homo sapiens GN=RAB6A PE=2 SV=1;>tr|A0A024R5J5|A0A024R5J5_HUMAN H.sapiens ras-related Hrab6 protein OS=Homo sapiens GN=RAB6A PE=2 SV=1;>tr|A0A024R5H8|A0A024R5H8_HUMAN RAB6A, member RAS oncogene family, isoform CRA_b	13	12	12	3	3	3	7	7	5	6	0	0	7	7	2	2	10	10	4	4	6	7	6	6	10	10	3	3	7	7	5	6	0	0	7	7	2	2	10	10	4	4
A0A024R5J4;Q8TE77;E9PIT5;A0A087WWG1	A0A024R5J4;Q8TE77;E9PIT5;A0A087WWG1	11;11;6;6	11;11;6;6	11;11;6;6	Protein phosphatase Slingshot homolog 3	SSH3	>tr|A0A024R5J4|A0A024R5J4_HUMAN Slingshot homolog 3 (Drosophila), isoform CRA_f OS=Homo sapiens GN=SSH3 PE=4 SV=1;>sp|Q8TE77|SSH3_HUMAN Protein phosphatase Slingshot homolog 3 OS=Homo sapiens GN=SSH3 PE=1 SV=2;>tr|E9PIT5|E9PIT5_HUMAN Protein phosphatase Sl	4	11	11	11	0	0	3	4	3	2	2	2	2	2	0	0	5	4	4	4	0	0	1	1	5	4	0	0	3	4	3	2	2	2	2	2	0	0	5	4	4	4
A0A024R5K1;Q9BR76;Q9NSK3;A0A087WW53;F5H390;Q59F81;B4DIU2;F5H0D2;Q2NNQ8;A9Z1Z3	A0A024R5K1;Q9BR76;Q9NSK3	21;21;13;10;10;10;10;4;1;1	21;21;13;10;10;10;10;4;1;1	21;21;13;10;10;10;10;4;1;1	Coronin;Coronin-1B	CORO1B;DKFZp762I166	>tr|A0A024R5K1|A0A024R5K1_HUMAN Coronin OS=Homo sapiens GN=CORO1B PE=3 SV=1;>sp|Q9BR76|COR1B_HUMAN Coronin-1B OS=Homo sapiens GN=CORO1B PE=1 SV=1;>tr|Q9NSK3|Q9NSK3_HUMAN Putative uncharacterized protein DKFZp762I166 (Fragment) OS=Homo sapiens GN=DKFZp762I1	10	21	21	21	10	9	12	13	14	14	8	8	16	16	5	5	13	14	10	11	12	12	12	12	15	14	10	9	12	13	14	14	8	8	16	16	5	5	13	14	10	11
A0A024R5L0;P42785;B7Z7Q6;E9PIG4;E9PQN3;E9PKN6;E9PQB5;E9PL85;E9PNF7;B3KR26;E9PLY4;E9PNJ1;E9PL49;E9PR42	A0A024R5L0;P42785;B7Z7Q6;E9PIG4;E9PQN3;E9PKN6;E9PQB5;E9PL85	16;16;14;10;9;9;8;8;4;4;3;3;2;1	16;16;14;10;9;9;8;8;4;4;3;3;2;1	16;16;14;10;9;9;8;8;4;4;3;3;2;1	Lysosomal Pro-X carboxypeptidase	PRCP	>tr|A0A024R5L0|A0A024R5L0_HUMAN Prolylcarboxypeptidase (Angiotensinase C), isoform CRA_a OS=Homo sapiens GN=PRCP PE=4 SV=1;>sp|P42785|PCP_HUMAN Lysosomal Pro-X carboxypeptidase OS=Homo sapiens GN=PRCP PE=1 SV=1;>tr|B7Z7Q6|B7Z7Q6_HUMAN cDNA FLJ57232, highly	14	16	16	16	6	7	12	12	11	11	6	7	9	10	8	7	9	10	6	6	12	11	9	9	9	9	6	7	12	12	11	11	6	7	9	10	8	7	9	10	6	6
F5H1Z6;A0A024R5L8;Q9Y365;F5H8H3;B3KTJ1;F5H8G1;F5GY11;H0YH17;A0A024R5G8;H0YFF3;F5H0V7;H0YGA9;F5GWK5;F5H5A8;H0YGN8;F5H3G8;F5GY07;R4S3H9	F5H1Z6;A0A024R5L8;Q9Y365;F5H8H3;B3KTJ1;F5H8G1;F5GY11;H0YH17;A0A024R5G8;H0YFF3;F5H0V7;H0YGA9	10;10;10;9;9;8;8;7;7;7;6;6;4;3;3;3;1;1	10;10;10;9;9;8;8;7;7;7;6;6;4;3;3;3;1;1	10;10;10;9;9;8;8;7;7;7;6;6;4;3;3;3;1;1	PCTP-like protein	STARD10	>tr|F5H1Z6|F5H1Z6_HUMAN PCTP-like protein (Fragment) OS=Homo sapiens GN=STARD10 PE=1 SV=1;>tr|A0A024R5L8|A0A024R5L8_HUMAN START domain containing 10, isoform CRA_a OS=Homo sapiens GN=STARD10 PE=4 SV=1;>sp|Q9Y365|PCTL_HUMAN PCTP-like protein OS=Homo sapiens	18	10	10	10	2	2	3	3	6	7	4	4	4	3	0	0	4	4	3	3	4	3	3	3	2	2	2	2	3	3	6	7	4	4	4	3	0	0	4	4	3	3
A0A024R5M3;Q53HG7;Q14247;Q76MU0;B3KRK4;B4E358;H0YCD9;A0A0B6XJY7;H0YEV2	A0A024R5M3;Q53HG7;Q14247;Q76MU0	15;15;15;10;5;3;2;1;1	15;15;15;10;5;3;2;1;1	15;15;15;10;5;3;2;1;1	Src substrate cortactin	CTTN;EMS1	>tr|A0A024R5M3|A0A024R5M3_HUMAN Cortactin, isoform CRA_c OS=Homo sapiens GN=CTTN PE=4 SV=1;>tr|Q53HG7|Q53HG7_HUMAN Cortactin isoform a variant (Fragment) OS=Homo sapiens PE=2 SV=1;>sp|Q14247|SRC8_HUMAN Src substrate cortactin OS=Homo sapiens GN=CTTN PE=1 S	9	15	15	15	3	2	7	6	4	4	2	1	3	2	0	0	6	7	6	6	4	5	5	4	7	6	3	2	7	6	4	4	2	1	3	2	0	0	6	7	6	6
A0A024R5P0;Q13153;B7Z302	A0A024R5P0;Q13153;B7Z302	6;6;5	2;2;2	2;2;2	Serine/threonine-protein kinase PAK 1	PAK1	>tr|A0A024R5P0|A0A024R5P0_HUMAN p21/Cdc42/Rac1-activated kinase 1 (STE20 homolog, yeast), isoform CRA_a OS=Homo sapiens GN=PAK1 PE=4 SV=1;>sp|Q13153|PAK1_HUMAN Serine/threonine-protein kinase PAK 1 OS=Homo sapiens GN=PAK1 PE=1 SV=2;>tr|B7Z302|B7Z302_HUMAN	3	6	2	2	2	2	3	3	3	5	2	2	3	2	0	0	3	3	2	2	3	3	2	2	2	2	1	1	1	1	2	2	1	1	0	0	0	0	1	1	0	0
A0A024R5Q7;P30520;B4E1L0;S4R2Z1;G3V2N1;Q8N142	A0A024R5Q7;P30520;B4E1L0	11;11;9;1;1;1	11;11;9;1;1;1	11;11;9;1;1;1	Adenylosuccinate synthetase isozyme 2	ADSS	>tr|A0A024R5Q7|A0A024R5Q7_HUMAN Adenylosuccinate synthetase isozyme 2 OS=Homo sapiens GN=ADSS PE=3 SV=1;>sp|P30520|PURA2_HUMAN Adenylosuccinate synthetase isozyme 2 OS=Homo sapiens GN=ADSS PE=1 SV=3;>tr|B4E1L0|B4E1L0_HUMAN Adenylosuccinate synthetase isozy	6	11	11	11	2	1	4	4	3	3	2	1	5	4	2	1	5	5	4	4	1	3	4	4	4	3	2	1	4	4	3	3	2	1	5	4	2	1	5	5	4	4
A0A024R5S5;O75822;H0YGJ7;H0YLP3	A0A024R5S5;O75822	3;3;1;1	3;3;1;1	3;3;1;1	Eukaryotic translation initiation factor 3 subunit J	EIF3S1;EIF3J	>tr|A0A024R5S5|A0A024R5S5_HUMAN Eukaryotic translation initiation factor 3 subunit J OS=Homo sapiens GN=EIF3S1 PE=3 SV=1;>sp|O75822|EIF3J_HUMAN Eukaryotic translation initiation factor 3 subunit J OS=Homo sapiens GN=EIF3J PE=1 SV=2	4	3	3	3	0	0	0	0	0	0	1	1	0	0	0	0	1	1	1	1	0	0	0	0	0	0	0	0	0	0	0	0	1	1	0	0	0	0	1	1	1	1
H3BTD3;A0A024R5U3;H3BMD8;P56211	H3BTD3;A0A024R5U3;H3BMD8;P56211	2;2;2;2	1;1;1;1	1;1;1;1	cAMP-regulated phosphoprotein 19	ARPP19;ARPP-19	>tr|H3BTD3|H3BTD3_HUMAN cAMP-regulated phosphoprotein 19 (Fragment) OS=Homo sapiens GN=ARPP19 PE=1 SV=1;>tr|A0A024R5U3|A0A024R5U3_HUMAN Cyclic AMP phosphoprotein, 19 kD, isoform CRA_a OS=Homo sapiens GN=ARPP-19 PE=4 SV=1;>tr|H3BMD8|H3BMD8_HUMAN cAMP-regula	4	2	1	1	0	0	0	0	0	0	0	0	0	0	0	0	0	0	1	1	0	0	1	1	0	0	0	0	0	0	0	0	0	0	0	0	0	0	0	0	1	1
A0A024R5U5;O14672;A0AV88;H3BS53;C9J9B4;H0YNC5	A0A024R5U5;O14672;A0AV88	17;17;10;2;1;1	17;17;10;2;1;1	17;17;10;2;1;1	Disintegrin and metalloproteinase domain-containing protein 10	ADAM10	>tr|A0A024R5U5|A0A024R5U5_HUMAN ADAM metallopeptidase domain 10, isoform CRA_b OS=Homo sapiens GN=ADAM10 PE=4 SV=1;>sp|O14672|ADA10_HUMAN Disintegrin and metalloproteinase domain-containing protein 10 OS=Homo sapiens GN=ADAM10 PE=1 SV=1;>tr|A0AV88|A0AV88_H	6	17	17	17	9	8	7	7	10	12	9	8	3	3	5	5	5	5	3	4	4	4	5	5	5	5	9	8	7	7	10	12	9	8	3	3	5	5	5	5	3	4
A0A024R5Z7;P07355;V9HW65;H0YN42;H0YMD0;H0YMU9;H0YM50;A6NMY6;B3KRQ1;H0YNP5;H0YKS4;H0YN28;H0YL33;B4DNH8;H0YMM1;H0YKZ7;H0YLV6;H0YMT9;H0YKX9;H0YNA0;H0YKL9;H0YMW4;H0YN52;H0YKV8;H0YMD9;H0YNB8;H0YKN4;H0YLE2	A0A024R5Z7;P07355;V9HW65;H0YN42;H0YMD0;H0YMU9;H0YM50;A6NMY6;B3KRQ1;H0YNP5;H0YKS4	29;29;28;23;21;21;21;19;17;15;15;14;14;14;12;9;9;9;9;8;8;8;6;6;5;4;4;3	29;29;28;23;21;21;21;19;17;15;15;14;14;14;12;9;9;9;9;8;8;8;6;6;5;4;4;3	29;29;28;23;21;21;21;19;17;15;15;14;14;14;12;9;9;9;9;8;8;8;6;6;5;4;4;3	Annexin;Annexin A2;Putative annexin A2-like protein	ANXA2;HEL-S-270;ANXA2P2	>tr|A0A024R5Z7|A0A024R5Z7_HUMAN Annexin OS=Homo sapiens GN=ANXA2 PE=3 SV=1;>sp|P07355|ANXA2_HUMAN Annexin A2 OS=Homo sapiens GN=ANXA2 PE=1 SV=2;>tr|V9HW65|V9HW65_HUMAN Annexin OS=Homo sapiens GN=HEL-S-270 PE=2 SV=1;>tr|H0YN42|H0YN42_HUMAN Annexin (Fragment	28	29	29	29	11	12	18	17	16	15	12	12	17	17	10	12	17	16	14	13	15	15	12	12	14	14	11	12	18	17	16	15	12	12	17	17	10	12	17	16	14	13
A0A024R5Z8;P62491;B4DMN1;B4DQU5;H3BN38	A0A024R5Z8;P62491;B4DMN1	15;15;14;6;2	1;1;1;1;1	1;1;1;1;1	Ras-related protein Rab-11A	RAB11A	>tr|A0A024R5Z8|A0A024R5Z8_HUMAN RAB11A, member RAS oncogene family, isoform CRA_a OS=Homo sapiens GN=RAB11A PE=4 SV=1;>sp|P62491|RB11A_HUMAN Ras-related protein Rab-11A OS=Homo sapiens GN=RAB11A PE=1 SV=3;>tr|B4DMN1|B4DMN1_HUMAN cDNA FLJ61136, highly simil	5	15	1	1	9	9	8	8	14	14	3	3	8	8	1	2	7	8	2	2	8	7	9	9	9	11	0	0	0	0	1	1	0	0	0	0	0	0	0	0	0	0
A0A024R5Z9;B4DRT3;H3BTN5;Q504U3;H3BR70;A0A024R609;H3BQ34;H3BUW1;H3BTJ2;H3BT25;H3BU13;H3BN34;H3BQZ3;B4DPM0;Q16716;Q16715;P30613	A0A024R5Z9;B4DRT3;H3BTN5;Q504U3;H3BR70;A0A024R609;H3BQ34	39;38;35;25;25;23;22;12;12;11;6;4;4;1;1;1;1	2;2;2;2;2;0;0;0;0;0;0;0;0;0;0;0;0	2;2;2;2;2;0;0;0;0;0;0;0;0;0;0;0;0	Pyruvate kinase	PKM2;PKM	>tr|A0A024R5Z9|A0A024R5Z9_HUMAN Pyruvate kinase OS=Homo sapiens GN=PKM2 PE=3 SV=1;>tr|B4DRT3|B4DRT3_HUMAN Pyruvate kinase OS=Homo sapiens PE=2 SV=1;>tr|H3BTN5|H3BTN5_HUMAN Pyruvate kinase (Fragment) OS=Homo sapiens GN=PKM PE=1 SV=1;>tr|Q504U3|Q504U3_HUMAN	17	39	2	2	22	24	23	23	28	28	15	17	25	24	18	22	28	28	19	20	22	23	25	24	24	25	0	0	0	0	1	2	0	0	1	1	1	1	0	0	0	0
Q7Z612;A0A024R608;P05386;Q6ICQ4	Q7Z612;A0A024R608;P05386;Q6ICQ4	2;2;2;1	2;2;2;1	2;2;2;1	60S acidic ribosomal protein P1	RPLP1	>tr|Q7Z612|Q7Z612_HUMAN Acidic ribosomal phosphoprotein P1 OS=Homo sapiens PE=2 SV=1;>tr|A0A024R608|A0A024R608_HUMAN Ribosomal protein, large, P1, isoform CRA_a OS=Homo sapiens GN=RPLP1 PE=3 SV=1;>sp|P05386|RLA1_HUMAN 60S acidic ribosomal protein P1 OS=Hom	4	2	2	2	0	0	0	0	1	2	0	1	0	0	0	0	0	0	0	0	0	0	0	0	0	0	0	0	0	0	1	2	0	1	0	0	0	0	0	0	0	0
A0A024R611;P31146;Q59G88;H3BRY3;Q6ZW98;H3BTU6;H3BRJ0	A0A024R611;P31146;Q59G88;H3BRY3	8;8;7;6;2;2;2	8;8;7;6;2;2;2	8;8;7;6;2;2;2	Coronin;Coronin-1A	CORO1A	>tr|A0A024R611|A0A024R611_HUMAN Coronin OS=Homo sapiens GN=CORO1A PE=3 SV=1;>sp|P31146|COR1A_HUMAN Coronin-1A OS=Homo sapiens GN=CORO1A PE=1 SV=4;>tr|Q59G88|Q59G88_HUMAN Coronin (Fragment) OS=Homo sapiens PE=3 SV=1;>tr|H3BRY3|H3BRY3_HUMAN Coronin OS=Homo s	7	8	8	8	0	0	0	0	0	0	0	0	0	0	8	6	0	0	0	0	0	0	0	0	0	0	0	0	0	0	0	0	0	0	0	0	8	6	0	0	0	0
H3BV22;H3BTA2;A0A024R625;P60510;Q5U086;H3BPN5;H3BVE3;I3L4X0	H3BV22;H3BTA2;A0A024R625;P60510;Q5U086	3;3;3;3;2;1;1;1	2;2;2;2;1;1;1;1	2;2;2;2;1;1;1;1	Serine/threonine-protein phosphatase;Serine/threonine-protein phosphatase 4 catalytic subunit	PPP4C	>tr|H3BV22|H3BV22_HUMAN Serine/threonine-protein phosphatase (Fragment) OS=Homo sapiens GN=PPP4C PE=1 SV=1;>tr|H3BTA2|H3BTA2_HUMAN Serine/threonine-protein phosphatase (Fragment) OS=Homo sapiens GN=PPP4C PE=1 SV=1;>tr|A0A024R625|A0A024R625_HUMAN Serine/thr	8	3	2	2	0	0	0	0	2	2	0	1	0	0	0	0	1	1	1	1	1	1	0	0	0	0	0	0	0	0	1	1	0	1	0	0	0	0	0	0	0	0
A0A024R637;O60343;Q5JU47;B4E0Y2;C9JIE2;Q7Z6H2;Q6PJJ8;B9A6J6;Q86TI0	A0A024R637;O60343	16;16;1;1;1;1;1;1;1	16;16;1;1;1;1;1;1;1	16;16;1;1;1;1;1;1;1	TBC1 domain family member 4	TBC1D4	>tr|A0A024R637|A0A024R637_HUMAN TBC1 domain family, member 4, isoform CRA_b OS=Homo sapiens GN=TBC1D4 PE=4 SV=1;>sp|O60343|TBCD4_HUMAN TBC1 domain family member 4 OS=Homo sapiens GN=TBC1D4 PE=1 SV=2	9	16	16	16	0	1	7	7	3	4	2	1	2	4	0	0	7	8	0	1	8	7	1	1	4	4	0	1	7	7	3	4	2	1	2	4	0	0	7	8	0	1
A0A0A0MRU5;A0A024R644;O75503;A0A1B0GWI2;B4E1V6;A0A1B0GTI0;A0A087WZY0;A0A1B0GWJ7;A0A1C7CYZ2;A0A1B0GTR6;A0A1B0GTV7;A0A1B0GUE8;A0A1B0GV94;A0A1B0GVL0;A0A1B0GU14	A0A0A0MRU5;A0A024R644;O75503;A0A1B0GWI2;B4E1V6	12;12;12;11;10;5;5;5;5;5;5;5;5;3;1	12;12;12;11;10;5;5;5;5;5;5;5;5;3;1	12;12;12;11;10;5;5;5;5;5;5;5;5;3;1	Ceroid-lipofuscinosis neuronal protein 5	CLN5	>tr|A0A0A0MRU5|A0A0A0MRU5_HUMAN Ceroid-lipofuscinosis neuronal protein 5 OS=Homo sapiens GN=CLN5 PE=1 SV=1;>tr|A0A024R644|A0A024R644_HUMAN Ceroid-lipofuscinosis neuronal protein 5 OS=Homo sapiens GN=CLN5 PE=1 SV=1;>sp|O75503|CLN5_HUMAN Ceroid-lipofuscinosi	15	12	12	12	4	4	5	5	9	9	1	1	4	4	2	2	7	6	0	0	3	3	5	5	7	7	4	4	5	5	9	9	1	1	4	4	2	2	7	6	0	0
G3V4W4;A0A024R649;Q96EK6;G3V5E4	G3V4W4;A0A024R649;Q96EK6;G3V5E4	8;8;8;5	8;8;8;5	8;8;8;5	Glucosamine 6-phosphate N-acetyltransferase	GNPNAT1	>tr|G3V4W4|G3V4W4_HUMAN Glucosamine 6-phosphate N-acetyltransferase (Fragment) OS=Homo sapiens GN=GNPNAT1 PE=1 SV=1;>tr|A0A024R649|A0A024R649_HUMAN Glucosamine-phosphate N-acetyltransferase 1, isoform CRA_a OS=Homo sapiens GN=GNPNAT1 PE=4 SV=1;>sp|Q96EK6|G	4	8	8	8	1	1	1	1	6	6	5	5	1	1	0	0	2	1	2	2	1	2	2	1	2	2	1	1	1	1	6	6	5	5	1	1	0	0	2	1	2	2
A0A024R652;P11586;F5H2F4;B7Z809;V9GYY3	A0A024R652;P11586;F5H2F4;B7Z809	28;28;27;27;2	28;28;27;27;2	28;28;27;27;2	C-1-tetrahydrofolate synthase, cytoplasmic;Methylenetetrahydrofolate dehydrogenase;Methenyltetrahydrofolate cyclohydrolase;Formyltetrahydrofolate synthetase;C-1-tetrahydrofolate synthase, cytoplasmic, N-terminally processed	MTHFD1	>tr|A0A024R652|A0A024R652_HUMAN Methylenetetrahydrofolate dehydrogenase (NADP+ dependent) 1, methenyltetrahydrofolate cyclohydrolase, formyltetrahydrofolate synthetase, isoform CRA_a OS=Homo sapiens GN=MTHFD1 PE=3 SV=1;>sp|P11586|C1TC_HUMAN C-1-tetrahydrof	5	28	28	28	5	5	6	8	12	11	4	4	6	6	0	0	15	12	3	4	6	6	5	7	11	12	5	5	6	8	12	11	4	4	6	6	0	0	15	12	3	4
A0A024R663;Q86UP2	A0A024R663;Q86UP2	2;2	2;2	2;2	Kinectin	KTN1	>tr|A0A024R663|A0A024R663_HUMAN Kinectin 1 (Kinesin receptor), isoform CRA_a OS=Homo sapiens GN=KTN1 PE=4 SV=1;>sp|Q86UP2|KTN1_HUMAN Kinectin OS=Homo sapiens GN=KTN1 PE=1 SV=1	2	2	2	2	0	0	1	1	0	0	0	0	0	0	0	0	2	1	0	0	0	0	1	1	1	1	0	0	1	1	0	0	0	0	0	0	0	0	2	1	0	0
G3V2S6;Q9H3H0;A0A024R683;Q9Y5K8;Q8N5Z9;H0YJS0;Q9NW63;G3V559;Q6PJ05;H0YJ55;G3V5S7;G3V3T8;G3V2V6;H0YJH8;G3V341	G3V2S6;Q9H3H0;A0A024R683;Q9Y5K8;Q8N5Z9;H0YJS0;Q9NW63;G3V559;Q6PJ05	5;5;5;5;4;3;3;3;3;2;2;2;2;2;1	5;5;5;5;4;3;3;3;3;2;2;2;2;2;1	5;5;5;5;4;3;3;3;3;2;2;2;2;2;1	V-type proton ATPase subunit D	ATP6V1D;VATD	>tr|G3V2S6|G3V2S6_HUMAN V-type proton ATPase subunit D OS=Homo sapiens GN=ATP6V1D PE=1 SV=1;>tr|Q9H3H0|Q9H3H0_HUMAN Vacuolar ATP synthase subunit D homolog OS=Homo sapiens GN=VATD PE=2 SV=1;>tr|A0A024R683|A0A024R683_HUMAN ATPase, H+ transporting, lysosomal	15	5	5	5	0	0	0	1	1	2	1	1	0	0	0	0	0	0	1	1	0	0	1	1	3	3	0	0	0	1	1	2	1	1	0	0	0	0	0	0	1	1
H0YJ34;A8K6S3;A0A024R687;Q96AC1;G3V5R2;Q5JWV4;G3V281;G3V3J0;A0A0U1RRM8;Q54A15;B2RAX1;Q9BQL6	H0YJ34;A8K6S3;A0A024R687;Q96AC1;G3V5R2;Q5JWV4;G3V281;G3V3J0;A0A0U1RRM8;Q54A15;B2RAX1;Q9BQL6	2;2;2;2;1;1;1;1;1;1;1;1	2;2;2;2;1;1;1;1;1;1;1;1	2;2;2;2;1;1;1;1;1;1;1;1	Fermitin family homolog 2;Fermitin family homolog 1	FERMT2;PLEKHC1;FERMT1;DTGCU2	>tr|H0YJ34|H0YJ34_HUMAN Fermitin family homolog 2 (Fragment) OS=Homo sapiens GN=FERMT2 PE=1 SV=1;>tr|A8K6S3|A8K6S3_HUMAN cDNA FLJ77570, highly similar to Homo sapiens pleckstrin homology domain containing, family C (with FERM domain) member 1 (PLEKHC1), mR	12	2	2	2	0	0	0	0	0	1	0	0	0	0	0	0	1	0	0	0	0	0	0	0	0	0	0	0	0	0	0	1	0	0	0	0	0	0	1	0	0	0
A0A024R694;P12814;H9KV75;B7Z565;Q86TX4;B4DFY0;B3KUX9;B7Z2W3;G3V2N5;B4DRP5;H7C5W8;G3V2W4;A1L0V1;P35609;H0YJ11;Q08043;H0YJW3;G3V2X9;B7Z2N5;A0A087WSZ2;B7Z4V1;Q5ZEZ4;G3V5M4;B7Z4P6;Q59FD9;B7Z4K1;F6THM6;G3V2E8;G3V380;B7Z4P8	A0A024R694;P12814;H9KV75;B7Z565;Q86TX4;B4DFY0	44;44;40;39;29;22;18;17;15;14;14;13;10;10;9;9;8;7;7;7;6;4;4;4;4;4;4;2;1;1	25;25;24;23;14;15;14;14;7;6;11;6;6;0;6;0;4;3;0;0;0;1;1;0;0;0;0;0;1;0	25;25;24;23;14;15;14;14;7;6;11;6;6;0;6;0;4;3;0;0;0;1;1;0;0;0;0;0;1;0	Alpha-actinin-1	ACTN1	>tr|A0A024R694|A0A024R694_HUMAN Actinin, alpha 1, isoform CRA_a OS=Homo sapiens GN=ACTN1 PE=4 SV=1;>sp|P12814|ACTN1_HUMAN Alpha-actinin-1 OS=Homo sapiens GN=ACTN1 PE=1 SV=2;>tr|H9KV75|H9KV75_HUMAN Alpha-actinin-1 OS=Homo sapiens GN=ACTN1 PE=1 SV=1;>tr|B7Z5	30	44	25	25	17	18	24	22	26	30	17	17	23	22	15	16	28	28	16	17	19	19	23	23	23	24	6	6	12	10	18	18	12	12	9	8	8	9	12	12	7	8
Q53FV8;A0A0S2Z4D2;A0A024R6A3;P49768;G3V5B1;G3V3P0;G3V449;G3V2B1;G3V519;G3V4M0;H0YM52;G3V4P4;G3V3Z0;E5RFW4;G3V499;G3V2G7;B7Z8T5;E5RG63;B4DVM3;E7ES96;B1AP22;P49810	Q53FV8;A0A0S2Z4D2;A0A024R6A3;P49768;G3V5B1;G3V3P0;G3V449;G3V2B1;G3V519;G3V4M0;H0YM52;G3V4P4;G3V3Z0;E5RFW4;G3V499;G3V2G7;B7Z8T5;E5RG63;B4DVM3;E7ES96;B1AP22;P49810	2;2;2;2;1;1;1;1;1;1;1;1;1;1;1;1;1;1;1;1;1;1	2;2;2;2;1;1;1;1;1;1;1;1;1;1;1;1;1;1;1;1;1;1	2;2;2;2;1;1;1;1;1;1;1;1;1;1;1;1;1;1;1;1;1;1	Presenilin;Presenilin-1;Presenilin-1 NTF subunit;Presenilin-1 CTF subunit;Presenilin-1 CTF12;Presenilin-2;Presenilin-2 NTF subunit;Presenilin-2 CTF subunit	PSEN1;PSEN2	>tr|Q53FV8|Q53FV8_HUMAN Presenilin (Fragment) OS=Homo sapiens PE=2 SV=1;>tr|A0A0S2Z4D2|A0A0S2Z4D2_HUMAN Presenilin (Fragment) OS=Homo sapiens GN=PSEN1 PE=2 SV=1;>tr|A0A024R6A3|A0A024R6A3_HUMAN Presenilin OS=Homo sapiens GN=PSEN1 PE=2 SV=1;>sp|P49768|PSN1_H	22	2	2	2	0	0	0	0	2	2	1	0	0	0	0	0	1	0	0	0	1	0	0	0	0	0	0	0	0	0	2	2	1	0	0	0	0	0	1	0	0	0
B5BUD5;A0A024R6A5;P35813;B2R8E4;E9PKB5;E9PL75;E9PJN3;Q5JB49	B5BUD5;A0A024R6A5;P35813;B2R8E4	16;16;16;15;7;4;4;1	16;16;16;15;7;4;4;1	12;12;12;11;4;3;3;0	Protein phosphatase 1A	PPM1A	>tr|B5BUD5|B5BUD5_HUMAN Protein phosphatase 1A isoform 1 (Fragment) OS=Homo sapiens GN=PPM1A PE=2 SV=1;>tr|A0A024R6A5|A0A024R6A5_HUMAN Protein phosphatase 1A (Formerly 2C), magnesium-dependent, alpha isoform, isoform CRA_a OS=Homo sapiens GN=PPM1A PE=3 SV=	8	16	16	12	2	2	6	6	9	10	1	2	5	5	1	1	8	9	4	4	5	4	4	3	6	6	2	2	6	6	9	10	1	2	5	5	1	1	8	9	4	4
A0A024R6B4;G3V4I0;A0A024R6D3;O75356;G3V450;H0YJH1;G3V3Y0	A0A024R6B4;G3V4I0;A0A024R6D3;O75356	8;8;8;8;2;1;1	8;8;8;8;2;1;1	8;8;8;8;2;1;1	Ectonucleoside triphosphate diphosphohydrolase 5	ENTPD5	>tr|A0A024R6B4|A0A024R6B4_HUMAN Ectonucleoside triphosphate diphosphohydrolase 5, isoform CRA_c OS=Homo sapiens GN=ENTPD5 PE=3 SV=1;>tr|G3V4I0|G3V4I0_HUMAN Ectonucleoside triphosphate diphosphohydrolase 5 OS=Homo sapiens GN=ENTPD5 PE=1 SV=1;>tr|A0A024R6D3|	7	8	8	8	0	0	1	1	1	2	1	1	0	0	0	0	7	6	1	1	2	2	2	2	1	2	0	0	1	1	1	2	1	1	0	0	0	0	7	6	1	1
A0A024R6B5;P54652;B3KUS2	A0A024R6B5;P54652;B3KUS2	31;31;18	26;26;14	15;15;8	Heat shock-related 70 kDa protein 2	HSPA2	>tr|A0A024R6B5|A0A024R6B5_HUMAN Heat shock 70kDa protein 2, isoform CRA_a OS=Homo sapiens GN=HSPA2 PE=3 SV=1;>sp|P54652|HSP72_HUMAN Heat shock-related 70 kDa protein 2 OS=Homo sapiens GN=HSPA2 PE=1 SV=1;>tr|B3KUS2|B3KUS2_HUMAN cDNA FLJ40505 fis, clone TEST	3	31	26	15	12	12	12	12	25	25	8	8	18	17	15	12	23	23	10	12	15	14	8	8	12	12	10	10	11	11	22	22	7	7	15	14	14	11	20	20	10	11
Q53HV6;A0A024R6C0;P61916;J3KMY5;B2R4S5;H0YIZ1;G3V3E8;E7EMS2;B4DV10;G3V3D1;G3V2V8	Q53HV6;A0A024R6C0;P61916;J3KMY5;B2R4S5;H0YIZ1;G3V3E8;E7EMS2;B4DV10;G3V3D1;G3V2V8	8;8;8;7;7;7;7;7;7;7;5	8;8;8;7;7;7;7;7;7;7;5	8;8;8;7;7;7;7;7;7;7;5	Epididymal secretory protein E1	NPC2	>tr|Q53HV6|Q53HV6_HUMAN Niemann-Pick disease, type C2 variant (Fragment) OS=Homo sapiens PE=2 SV=1;>tr|A0A024R6C0|A0A024R6C0_HUMAN Niemann-Pick disease, type C2, isoform CRA_a OS=Homo sapiens GN=NPC2 PE=4 SV=1;>sp|P61916|NPC2_HUMAN Epididymal secretory pro	11	8	8	8	5	6	5	5	8	8	5	5	5	5	4	5	7	6	3	3	6	7	5	6	6	6	5	6	5	5	8	8	5	5	5	5	4	5	7	6	3	3
A0A024R6D1;Q8TD19;B3KY50;G3V5V0;G3V2Z5;Q6PKF2	A0A024R6D1;Q8TD19	9;9;4;1;1;1	9;9;4;1;1;1	9;9;4;1;1;1	Serine/threonine-protein kinase Nek9	NEK9	>tr|A0A024R6D1|A0A024R6D1_HUMAN NIMA (Never in mitosis gene a)-related kinase 9, isoform CRA_a OS=Homo sapiens GN=NEK9 PE=4 SV=1;>sp|Q8TD19|NEK9_HUMAN Serine/threonine-protein kinase Nek9 OS=Homo sapiens GN=NEK9 PE=1 SV=2	6	9	9	9	0	0	3	2	3	3	2	2	1	0	0	0	1	1	1	1	0	0	1	1	2	2	0	0	3	2	3	3	2	2	1	0	0	0	1	1	1	1
A0A0A0MQV0;A0A024R6E8;P54803;A0A087WX10;G3V5E8;G3V4M2;G3V255	A0A0A0MQV0;A0A024R6E8;P54803;A0A087WX10;G3V5E8	11;11;11;9;6;4;4	11;11;11;9;6;4;4	7;7;7;7;6;4;1	Galactocerebrosidase	GALC	>tr|A0A0A0MQV0|A0A0A0MQV0_HUMAN Testis tissue sperm-binding protein Li 88E OS=Homo sapiens PE=2 SV=1;>tr|A0A024R6E8|A0A024R6E8_HUMAN Galactosylceramidase, isoform CRA_c OS=Homo sapiens GN=GALC PE=4 SV=1;>sp|P54803|GALC_HUMAN Galactocerebrosidase OS=Homo sa	7	11	11	7	6	6	1	1	9	9	3	3	4	4	2	2	2	2	3	3	6	6	3	3	4	4	6	6	1	1	9	9	3	3	4	4	2	2	2	2	3	3
A0A024R6G3;G3V4U0;G3XA98;Q86TV4;Q9UBX5;B3KQA8	A0A024R6G3;G3V4U0;G3XA98;Q86TV4;Q9UBX5;B3KQA8	4;4;4;4;4;3	4;4;4;4;4;3	4;4;4;4;4;3	Fibulin-5	FBLN5	>tr|A0A024R6G3|A0A024R6G3_HUMAN Fibulin 5, isoform CRA_b OS=Homo sapiens GN=FBLN5 PE=2 SV=1;>tr|G3V4U0|G3V4U0_HUMAN Fibulin-5 OS=Homo sapiens GN=FBLN5 PE=1 SV=1;>tr|G3XA98|G3XA98_HUMAN Fibulin 5, isoform CRA_a OS=Homo sapiens GN=FBLN5 PE=1 SV=1;>tr|Q86TV4|	6	4	4	4	2	2	1	1	2	2	0	0	1	1	0	0	0	0	0	0	0	0	0	0	0	0	2	2	1	1	2	2	0	0	1	1	0	0	0	0	0	0
B4DE87;A0A024R6H3;Q13572;G3V588;G3V3C0;G3V5A3;G3V4M9;Q8N3Y0	B4DE87;A0A024R6H3;Q13572;G3V588;G3V3C0;G3V5A3;G3V4M9;Q8N3Y0	5;5;5;3;3;3;3;3	5;5;5;3;3;3;3;3	5;5;5;3;3;3;3;3	Inositol-tetrakisphosphate 1-kinase	ITPK1	>tr|B4DE87|B4DE87_HUMAN Inositol-tetrakisphosphate 1-kinase OS=Homo sapiens PE=2 SV=1;>tr|A0A024R6H3|A0A024R6H3_HUMAN Inositol 1,3,4-triphosphate 5/6 kinase, isoform CRA_a OS=Homo sapiens GN=ITPK1 PE=4 SV=1;>sp|Q13572|ITPK1_HUMAN Inositol-tetrakisphosphate	8	5	5	5	0	0	1	1	0	0	0	0	3	2	0	0	2	2	2	2	0	0	1	1	0	0	0	0	1	1	0	0	0	0	3	2	0	0	2	2	2	2
A0A024R6I3;Q53GF9;P49755;B4DZH3;G3V2K7;B4DL12	A0A024R6I3;Q53GF9;P49755;B4DZH3;G3V2K7;B4DL12	8;8;8;4;4;4	8;8;8;4;4;4	8;8;8;4;4;4	Transmembrane emp24 domain-containing protein 10	TMED10	>tr|A0A024R6I3|A0A024R6I3_HUMAN Testicular tissue protein Li 206 OS=Homo sapiens GN=TMED10 PE=2 SV=1;>tr|Q53GF9|Q53GF9_HUMAN Full-length cDNA 5-PRIME end of clone CS0DF013YM24 of Fetal brain of Homo sapiens (Human) variant (Fragment) OS=Homo sapiens PE=2 S	6	8	8	8	2	2	2	2	5	5	3	2	4	4	1	1	5	5	2	2	5	4	3	3	3	3	2	2	2	2	5	5	3	2	4	4	1	1	5	5	2	2
B2R815;A0A024R6I9;P29622	B2R815;A0A024R6I9;P29622	12;12;12	12;12;12	12;12;12	Kallistatin	SERPINA4	>tr|B2R815|B2R815_HUMAN cDNA, FLJ93695, highly similar to Homo sapiens serpin peptidase inhibitor, clade A (alpha-1 antiproteinase, antitrypsin), member 4 (SERPINA4), mRNA OS=Homo sapiens PE=2 SV=1;>tr|A0A024R6I9|A0A024R6I9_HUMAN Serpin peptidase inhibitor	3	12	12	12	2	2	3	3	1	1	3	3	0	0	1	1	1	1	2	1	4	5	1	1	4	3	2	2	3	3	1	1	3	3	0	0	1	1	1	1	2	1
A0A024R6K8;P23381;G3V3H8;G3V3Y5;B4DTK8;G3V277;G3V423;G3V5U1;G3V456;G3V3P2;G3V227;H0YJP3;G3V2Y7;G3V3X0;G3V2F2;G3V3R3;G3V4S4;G3V313;G3V339;G3V2C0;G3V4C7;G3V4N8;G3V5W1;G3V3S7	A0A024R6K8;P23381;G3V3H8;G3V3Y5	17;17;9;9;8;8;7;7;7;5;5;5;4;2;1;1;1;1;1;1;1;1;1;1	17;17;9;9;8;8;7;7;7;5;5;5;4;2;1;1;1;1;1;1;1;1;1;1	17;17;9;9;8;8;7;7;7;5;5;5;4;2;1;1;1;1;1;1;1;1;1;1	Tryptophan--tRNA ligase, cytoplasmic;T1-TrpRS;T2-TrpRS	WARS	>tr|A0A024R6K8|A0A024R6K8_HUMAN Tryptophanyl-tRNA synthetase, isoform CRA_a OS=Homo sapiens GN=WARS PE=3 SV=1;>sp|P23381|SYWC_HUMAN Tryptophan--tRNA ligase, cytoplasmic OS=Homo sapiens GN=WARS PE=1 SV=2;>tr|G3V3H8|G3V3H8_HUMAN Tryptophan--tRNA ligase, cyto	24	17	17	17	6	6	11	11	8	9	3	3	9	10	4	4	6	7	8	7	6	5	5	7	6	5	6	6	11	11	8	9	3	3	9	10	4	4	6	7	8	7
A8K5J7;A0A024R6M6;Q9UL15;G3V274	A8K5J7;A0A024R6M6;Q9UL15	5;5;5;1	5;5;5;1	5;5;5;1	BAG family molecular chaperone regulator 5	BAG5	>tr|A8K5J7|A8K5J7_HUMAN cDNA FLJ77290, highly similar to Homo sapiens BCL2-associated athanogene 5 (BAG5), mRNA OS=Homo sapiens PE=2 SV=1;>tr|A0A024R6M6|A0A024R6M6_HUMAN BCL2-associated athanogene 5 OS=Homo sapiens GN=BAG5 PE=2 SV=1;>sp|Q9UL15|BAG5_HUMAN B	4	5	5	5	0	0	0	0	1	1	3	2	0	0	0	0	1	1	2	2	0	0	0	0	0	0	0	0	0	0	1	1	3	2	0	0	0	0	1	1	2	2
A0A024R6N2;Q9Y5S2;H0YLY0;Q86TR8;Q86XZ8;B9EGA7;A0A0A0MRJ0;Q5VT25;H0Y6V3;H0Y7V8;Q5HYB0;A0A0A0MRJ1;H0Y5V1;H0Y6R0	A0A024R6N2;Q9Y5S2;H0YLY0	12;12;6;5;3;3;3;3;2;2;2;2;2;1	12;12;6;5;3;3;3;3;2;2;2;2;2;1	9;9;4;4;2;0;0;0;0;0;0;0;0;0	Serine/threonine-protein kinase MRCK beta	CDC42BPB	>tr|A0A024R6N2|A0A024R6N2_HUMAN CDC42 binding protein kinase beta (DMPK-like), isoform CRA_a OS=Homo sapiens GN=CDC42BPB PE=3 SV=1;>sp|Q9Y5S2|MRCKB_HUMAN Serine/threonine-protein kinase MRCK beta OS=Homo sapiens GN=CDC42BPB PE=1 SV=2;>tr|H0YLY0|H0YLY0_HUMA	14	12	12	9	1	1	1	1	6	6	0	0	1	2	1	0	4	5	2	0	1	1	2	2	2	2	1	1	1	1	6	6	0	0	1	2	1	0	4	5	2	0
A0A024R6N9;P05154;B4DPC7;B3KTV6;B4DDH1;G3V5Q9;G3V2M1;G3V264;G3V482;G3V265;G3V5I3;G3V4B4;G3V3F5	A0A024R6N9;P05154;B4DPC7;B3KTV6;B4DDH1;G3V5Q9	24;24;21;19;18;17;10;7;5;5;2;2;2	24;24;21;19;18;17;10;7;5;5;2;2;2	24;24;21;19;18;17;10;7;5;5;2;2;2	Plasma serine protease inhibitor	SERPINA5	>tr|A0A024R6N9|A0A024R6N9_HUMAN Serpin peptidase inhibitor, clade A (Alpha-1 antiproteinase, antitrypsin), member 5, isoform CRA_a OS=Homo sapiens GN=SERPINA5 PE=3 SV=1;>sp|P05154|IPSP_HUMAN Plasma serine protease inhibitor OS=Homo sapiens GN=SERPINA5 PE=1	13	24	24	24	14	14	14	13	15	14	14	13	11	13	9	9	10	10	7	7	13	13	12	12	13	13	14	14	14	13	15	14	14	13	11	13	9	9	10	10	7	7
A0A024R6P0;B3KS79;P01011;G3V595;G3V3A0;A0A087WY93	A0A024R6P0;B3KS79;P01011;G3V595;G3V3A0	4;4;4;3;2;1	4;4;4;3;2;1	4;4;4;3;2;1	Alpha-1-antichymotrypsin;Alpha-1-antichymotrypsin His-Pro-less	SERPINA3	>tr|A0A024R6P0|A0A024R6P0_HUMAN Serpin peptidase inhibitor, clade A (Alpha-1 antiproteinase, antitrypsin), member 3, isoform CRA_c OS=Homo sapiens GN=SERPINA3 PE=3 SV=1;>tr|B3KS79|B3KS79_HUMAN cDNA FLJ35730 fis, clone TESTI2003131, highly similar to ALPHA-	6	4	4	4	1	1	1	1	0	0	0	1	0	1	0	0	0	0	0	0	1	2	0	0	0	0	1	1	1	1	0	0	0	1	0	1	0	0	0	0	0	0
G3V4I5;A0A024R6P6;Q9P0R6;G3V368	G3V4I5;A0A024R6P6;Q9P0R6;G3V368	2;2;2;1	2;2;2;1	2;2;2;1	GSK3-beta interaction protein	GSKIP;C14orf129	>tr|G3V4I5|G3V4I5_HUMAN GSK3-beta interaction protein (Fragment) OS=Homo sapiens GN=GSKIP PE=1 SV=1;>tr|A0A024R6P6|A0A024R6P6_HUMAN Chromosome 14 open reading frame 129, isoform CRA_a OS=Homo sapiens GN=C14orf129 PE=4 SV=1;>sp|Q9P0R6|GSKIP_HUMAN GSK3-beta	4	2	2	2	0	0	1	1	0	0	0	0	0	0	0	0	2	1	0	0	0	0	0	0	0	1	0	0	1	1	0	0	0	0	0	0	0	0	2	1	0	0
Q6IBU0;A0A024R6Q1;P55010;H0YMJ8;H0YM54;H0YLZ1;Q32Q19;Q05DF3;H0YN40;H0YK29;H0YK11;B4DEN3	Q6IBU0;A0A024R6Q1;P55010;H0YMJ8;H0YM54;H0YLZ1;Q32Q19;Q05DF3;H0YN40	8;8;8;4;4;4;4;4;4;2;2;1	8;8;8;4;4;4;4;4;4;2;2;1	8;8;8;4;4;4;4;4;4;2;2;1	Eukaryotic translation initiation factor 5	EIF5	>tr|Q6IBU0|Q6IBU0_HUMAN EIF5 protein OS=Homo sapiens GN=EIF5 PE=2 SV=1;>tr|A0A024R6Q1|A0A024R6Q1_HUMAN Eukaryotic translation initiation factor 5, isoform CRA_b OS=Homo sapiens GN=EIF5 PE=4 SV=1;>sp|P55010|IF5_HUMAN Eukaryotic translation initiation factor	12	8	8	8	1	2	5	5	3	3	1	1	3	3	0	0	6	6	2	2	2	2	2	2	6	5	1	2	5	5	3	3	1	1	3	3	0	0	6	6	2	2
A0A024R6R4;P08253;H3BR66;H3BS34;H3BV48;Q2EF79	A0A024R6R4;P08253	35;35;14;9;8;3	35;35;14;9;8;3	34;34;14;8;8;3	72 kDa type IV collagenase;PEX	MMP2	>tr|A0A024R6R4|A0A024R6R4_HUMAN Matrix metallopeptidase 2 (Gelatinase A, 72kDa gelatinase, 72kDa type IV collagenase), isoform CRA_a OS=Homo sapiens GN=MMP2 PE=3 SV=1;>sp|P08253|MMP2_HUMAN 72 kDa type IV collagenase OS=Homo sapiens GN=MMP2 PE=1 SV=2	6	35	35	34	16	16	19	18	24	23	15	15	15	16	11	12	12	14	8	9	17	18	12	11	13	14	16	16	19	18	24	23	15	15	15	16	11	12	12	14	8	9
A0A024R6S1;O60884;T2DN57;A0A087WT48;T2DPK5	A0A024R6S1;O60884	14;14;5;4;3	14;14;5;4;3	14;14;5;4;3	DnaJ homolog subfamily A member 2	DNAJA2	>tr|A0A024R6S1|A0A024R6S1_HUMAN DnaJ (Hsp40) homolog, subfamily A, member 2, isoform CRA_a OS=Homo sapiens GN=DNAJA2 PE=3 SV=1;>sp|O60884|DNJA2_HUMAN DnaJ homolog subfamily A member 2 OS=Homo sapiens GN=DNAJA2 PE=1 SV=1	5	14	14	14	3	3	3	4	11	11	3	3	4	3	1	1	6	4	3	3	3	2	3	4	5	5	3	3	3	4	11	11	3	3	4	3	1	1	6	4	3	3
H3BRH0;B3KQV4;B3KQN7;A0A0S2Z517;A0A024R6U7;Q9Y653;H3BSJ6;H3BNH4;H3BV52;B4DM06;H3BTD2;H3BRB4;H3BSR1;H3BVE9;H3BQJ9;H3BNN3;H3BPA6;H3BTK9;H3BSP5;H3BSN7;H3BV72;H3BRA1;H3BT88;H3BUI6;H3BSB8;H3BRI2;A0A1B0GX62;H3BMF8;H3BUH2;H3BM73;H3BS94;H3BRZ4;H3BVA0;H3BMY9;H3BTH7;H3BRI7;H3BQZ1;H3BVD3;H3BUU6;H3BQ46;H3BP67	H3BRH0;B3KQV4;B3KQN7;A0A0S2Z517;A0A024R6U7;Q9Y653;H3BSJ6;H3BNH4;H3BV52;B4DM06	4;4;4;4;4;4;3;3;3;3;1;1;1;1;1;1;1;1;1;1;1;1;1;1;1;1;1;1;1;1;1;1;1;1;1;1;1;1;1;1;1	4;4;4;4;4;4;3;3;3;3;1;1;1;1;1;1;1;1;1;1;1;1;1;1;1;1;1;1;1;1;1;1;1;1;1;1;1;1;1;1;1	4;4;4;4;4;4;3;3;3;3;1;1;1;1;1;1;1;1;1;1;1;1;1;1;1;1;1;1;1;1;1;1;1;1;1;1;1;1;1;1;1	G-protein coupled receptor 56;GPR56 N-terminal fragment;GPR56 C-terminal fragment	GPR56	>tr|H3BRH0|H3BRH0_HUMAN Adhesion G-protein-coupled receptor G1 (Fragment) OS=Homo sapiens GN=ADGRG1 PE=1 SV=1;>tr|B3KQV4|B3KQV4_HUMAN cDNA PSEC0255 fis, clone NT2RP3003536, highly similar to G-protein coupled receptor 56 OS=Homo sapiens PE=2 SV=1;>tr|B3KQN	41	4	4	4	2	2	2	2	0	0	0	0	1	0	0	1	2	1	0	0	1	1	1	1	0	0	2	2	2	2	0	0	0	0	1	0	0	1	2	1	0	0
Q7KZY0;A0A024R6U8;P51511	Q7KZY0;A0A024R6U8;P51511	2;2;2	2;2;2	2;2;2	Matrix metalloproteinase-15	MMP15	>tr|Q7KZY0|Q7KZY0_HUMAN Matrix metalloproteinase 15 (Membrane-inserted) OS=Homo sapiens PE=2 SV=1;>tr|A0A024R6U8|A0A024R6U8_HUMAN Matrix metallopeptidase 15 (Membrane-inserted), isoform CRA_a OS=Homo sapiens GN=MMP15 PE=3 SV=1;>sp|P51511|MMP15_HUMAN Matrix	3	2	2	2	0	0	0	0	2	2	0	0	0	0	0	0	0	0	0	0	0	0	0	0	0	0	0	0	0	0	2	2	0	0	0	0	0	0	0	0	0	0
A0A024R6Y2;P61970;H3BRV9	A0A024R6Y2;P61970;H3BRV9	5;5;3	5;5;3	5;5;3	Nuclear transport factor 2	NUTF2	>tr|A0A024R6Y2|A0A024R6Y2_HUMAN Nuclear transport factor 2, isoform CRA_a OS=Homo sapiens GN=NUTF2 PE=4 SV=1;>sp|P61970|NTF2_HUMAN Nuclear transport factor 2 OS=Homo sapiens GN=NUTF2 PE=1 SV=1;>tr|H3BRV9|H3BRV9_HUMAN Nuclear transport factor 2 (Fragment) O	3	5	5	5	3	3	3	3	5	5	3	3	3	3	1	1	3	3	2	2	3	3	3	3	4	4	3	3	3	3	5	5	3	3	3	3	1	1	3	3	2	2
A0A024R6Z0;O43237;B4DHD8;B4E2E0;Q63HJ8;J3KRZ2;J3KRI4;H3BUM4	A0A024R6Z0;O43237;B4DHD8;B4E2E0	8;8;6;5;3;1;1;1	7;7;5;4;2;1;1;1	7;7;5;4;2;1;1;1	Cytoplasmic dynein 1 light intermediate chain 2	DYNC1LI2	>tr|A0A024R6Z0|A0A024R6Z0_HUMAN Dynein, cytoplasmic 1, light intermediate chain 2, isoform CRA_a OS=Homo sapiens GN=DYNC1LI2 PE=4 SV=1;>sp|O43237|DC1L2_HUMAN Cytoplasmic dynein 1 light intermediate chain 2 OS=Homo sapiens GN=DYNC1LI2 PE=1 SV=1;>tr|B4DHD8|B	8	8	7	7	0	0	4	4	4	4	1	0	1	1	1	0	1	1	2	2	0	0	2	2	1	1	0	0	4	4	3	3	1	0	1	1	1	0	1	1	2	2
A0A024R705;Q9UN37;I3L4J1;Q9NXK5;Q9UF30;Q49AN7	A0A024R705;Q9UN37;I3L4J1;Q9NXK5;Q9UF30	18;18;16;9;9;2	12;12;10;6;6;2	12;12;10;6;6;2	Vacuolar protein sorting-associated protein 4A	VPS4A;DKFZp434E0418	>tr|A0A024R705|A0A024R705_HUMAN Vacuolar protein sorting 4A (Yeast), isoform CRA_c OS=Homo sapiens GN=VPS4A PE=3 SV=1;>sp|Q9UN37|VPS4A_HUMAN Vacuolar protein sorting-associated protein 4A OS=Homo sapiens GN=VPS4A PE=1 SV=1;>tr|I3L4J1|I3L4J1_HUMAN Uncharact	6	18	12	12	5	7	8	8	11	11	4	4	8	8	2	2	9	10	5	5	8	10	9	9	13	14	3	5	5	5	8	8	3	3	4	3	1	1	6	7	3	3
A0A024R711;O00308;B4DIN7;B4DHF6;H3BPJ8;H3BRX8;H3BS79	A0A024R711;O00308;B4DIN7;B4DHF6	6;6;5;4;1;1;1	3;3;2;1;1;1;1	3;3;2;1;1;1;1	E3 ubiquitin-protein ligase;NEDD4-like E3 ubiquitin-protein ligase WWP2	WWP2	>tr|A0A024R711|A0A024R711_HUMAN E3 ubiquitin-protein ligase OS=Homo sapiens GN=WWP2 PE=4 SV=1;>sp|O00308|WWP2_HUMAN NEDD4-like E3 ubiquitin-protein ligase WWP2 OS=Homo sapiens GN=WWP2 PE=1 SV=2;>tr|B4DIN7|B4DIN7_HUMAN cDNA FLJ55648, highly similar to NEDD4	7	6	3	3	1	1	2	1	3	3	1	1	0	0	0	0	1	2	0	1	1	1	1	1	1	1	0	0	0	0	1	1	1	1	0	0	0	0	0	1	0	0
B3KY43;Q6DHZ2;A0A024R712;P31323;Q75MP1;O60380	B3KY43;Q6DHZ2;A0A024R712;P31323;Q75MP1	13;13;13;13;8;5	10;10;10;10;7;3	10;10;10;10;7;3	cAMP-dependent protein kinase type II-beta regulatory subunit	PRKAR2B	>tr|B3KY43|B3KY43_HUMAN cDNA FLJ46798 fis, clone TRACH3031660, highly similar to cAMP-dependent protein kinase type II-beta regulatory subunit OS=Homo sapiens PE=2 SV=1;>tr|Q6DHZ2|Q6DHZ2_HUMAN Protein kinase, cAMP-dependent, regulatory, type II, beta OS=Ho	6	13	10	10	2	2	5	5	6	6	3	3	6	7	2	2	7	7	4	4	3	3	4	4	6	5	0	0	3	3	3	3	1	1	4	5	0	0	4	4	2	2
A0A024R718;P43490;A0A0C4DFS8;B7Z8W6;Q658Z1;C9JG65;C9JF35	A0A024R718;P43490;A0A0C4DFS8	26;26;18;11;5;3;2	26;26;18;11;5;3;2	26;26;18;11;5;3;2	Nicotinamide phosphoribosyltransferase	PBEF1;NAMPT	>tr|A0A024R718|A0A024R718_HUMAN Pre-B-cell colony enhancing factor 1, isoform CRA_a OS=Homo sapiens GN=PBEF1 PE=4 SV=1;>sp|P43490|NAMPT_HUMAN Nicotinamide phosphoribosyltransferase OS=Homo sapiens GN=NAMPT PE=1 SV=1;>tr|A0A0C4DFS8|A0A0C4DFS8_HUMAN Nicotina	7	26	26	26	13	13	16	14	19	17	8	8	16	18	7	6	19	19	10	9	12	13	16	15	20	19	13	13	16	14	19	17	8	8	16	18	7	6	19	19	10	9
E9PFH4;B2R6H7;A0A024R794;C9J7E5;Q9Y5L0;B3KMX1;B3KM69	E9PFH4;B2R6H7;A0A024R794;C9J7E5;Q9Y5L0	3;3;3;3;3;1;1	3;3;3;3;3;1;1	3;3;3;3;3;1;1	Transportin-3	TNPO3	>tr|E9PFH4|E9PFH4_HUMAN Transportin-3 OS=Homo sapiens GN=TNPO3 PE=1 SV=1;>tr|B2R6H7|B2R6H7_HUMAN cDNA, FLJ92955, highly similar to Homo sapiens transportin-SR (TRN-SR), mRNA OS=Homo sapiens PE=2 SV=1;>tr|A0A024R794|A0A024R794_HUMAN Transportin 3, isoform C	7	3	3	3	0	0	0	0	3	3	0	0	0	0	0	0	0	0	0	0	0	0	0	0	0	0	0	0	0	0	3	3	0	0	0	0	0	0	0	0	0	0
A0A024R7A8;P15121;Q59EL5;E9PCX2;E9PEF9;O15289	A0A024R7A8;P15121;Q59EL5;E9PCX2	23;23;17;17;7;1	23;23;17;17;7;1	22;22;17;17;7;1	Aldose reductase	AKR1B1	>tr|A0A024R7A8|A0A024R7A8_HUMAN Aldo-keto reductase family 1, member B1 (Aldose reductase), isoform CRA_a OS=Homo sapiens GN=AKR1B1 PE=4 SV=1;>sp|P15121|ALDR_HUMAN Aldose reductase OS=Homo sapiens GN=AKR1B1 PE=1 SV=3;>tr|Q59EL5|Q59EL5_HUMAN Aldo-keto reduc	6	23	23	22	14	14	17	16	12	12	6	6	13	14	6	7	14	14	8	8	13	13	14	14	12	13	14	14	17	16	12	12	6	6	13	14	6	7	14	14	8	8
B2R4N3;A0A024R7B0;Q9BZL1;K7EQ43	B2R4N3;A0A024R7B0;Q9BZL1	3;3;3;1	3;3;3;1	3;3;3;1	Ubiquitin-like protein 5	UBL5	>tr|B2R4N3|B2R4N3_HUMAN cDNA, FLJ92155, highly similar to Homo sapiens ubiquitin-like 5 (UBL5), mRNA OS=Homo sapiens PE=2 SV=1;>tr|A0A024R7B0|A0A024R7B0_HUMAN Testicular tissue protein Li 217 OS=Homo sapiens GN=UBL5 PE=2 SV=1;>sp|Q9BZL1|UBL5_HUMAN Ubiquiti	4	3	3	3	0	0	0	0	0	0	0	0	1	1	0	0	2	3	0	0	1	0	1	2	2	2	0	0	0	0	0	0	0	0	1	1	0	0	2	3	0	0
A0A024R7B7;Q16543;Q6FG59;K7EKQ2;K7EL68;K7EQA9;A1L0W4;K7EIU0	A0A024R7B7;Q16543;Q6FG59;K7EKQ2;K7EL68;K7EQA9	13;13;12;8;7;7;6;3	13;13;12;8;7;7;6;3	13;13;12;8;7;7;6;3	Hsp90 co-chaperone Cdc37;Hsp90 co-chaperone Cdc37, N-terminally processed	CDC37	>tr|A0A024R7B7|A0A024R7B7_HUMAN CDC37 cell division cycle 37 homolog (S. cerevisiae), isoform CRA_a OS=Homo sapiens GN=CDC37 PE=4 SV=1;>sp|Q16543|CDC37_HUMAN Hsp90 co-chaperone Cdc37 OS=Homo sapiens GN=CDC37 PE=1 SV=1;>tr|Q6FG59|Q6FG59_HUMAN CDC37 protein	8	13	13	13	0	0	2	2	3	5	5	5	4	4	3	3	6	6	5	5	4	3	2	2	3	3	0	0	2	2	3	5	5	5	4	4	3	3	6	6	5	5
A0A024R7D0;A0A087WZK0;P49366;M0R0V2;Q5J8M5;A0A024R7G5;A0A024R7E9;M0R253;M0QX43;M0R1T2;B4DU50;B4E3M2;M0R264	A0A024R7D0;A0A087WZK0;P49366;M0R0V2;Q5J8M5;A0A024R7G5;A0A024R7E9	4;4;4;2;2;2;2;1;1;1;1;1;1	4;4;4;2;2;2;2;1;1;1;1;1;1	4;4;4;2;2;2;2;1;1;1;1;1;1	Deoxyhypusine synthase	DHPS	>tr|A0A024R7D0|A0A024R7D0_HUMAN Deoxyhypusine synthase, isoform CRA_b OS=Homo sapiens GN=DHPS PE=4 SV=1;>tr|A0A087WZK0|A0A087WZK0_HUMAN Deoxyhypusine synthase OS=Homo sapiens GN=DHPS PE=1 SV=1;>sp|P49366|DHYS_HUMAN Deoxyhypusine synthase OS=Homo sapiens GN	13	4	4	4	0	0	2	2	1	1	0	0	0	0	0	0	1	0	1	0	0	1	1	1	2	2	0	0	2	2	1	1	0	0	0	0	0	0	1	0	1	0
A0A024R7D2;A0A024R798;A0A088QF11;K7ER17;K7EMR2;B3KX31	A0A024R7D2;A0A024R798;A0A088QF11	12;11;10;2;1;1	12;11;10;2;1;1	2;2;1;0;0;0		SLC44A2	>tr|A0A024R7D2|A0A024R7D2_HUMAN Solute carrier family 44, member 2, isoform CRA_a OS=Homo sapiens GN=SLC44A2 PE=3 SV=1;>tr|A0A024R798|A0A024R798_HUMAN Choline transporter-like protein 2 isoform 2 OS=Homo sapiens GN=SLC44A2 PE=3 SV=1;>tr|A0A088QF11|A0A088QF	6	12	12	2	3	3	4	4	7	8	2	2	2	2	1	2	5	6	2	1	1	1	3	2	4	4	3	3	4	4	7	8	2	2	2	2	1	2	5	6	2	1
Q9UH51;A0A024R7D5;J3KMZ9;H0YMD1;P01130;H0YM92;A0A0E3KII0;A0A0E3MS57;H0YMQ3;E2J5K4	Q9UH51;A0A024R7D5;J3KMZ9;H0YMD1;P01130	9;9;9;9;9;4;2;2;2;1	9;9;9;9;9;4;2;2;2;1	9;9;9;9;9;4;2;2;2;1	Low-density lipoprotein receptor	LDLR	>tr|Q9UH51|Q9UH51_HUMAN Low density lipoprotein receptor (Fragment) OS=Homo sapiens GN=LDLR PE=4 SV=1;>tr|A0A024R7D5|A0A024R7D5_HUMAN Low density lipoprotein receptor (Familial hypercholesterolemia), isoform CRA_b OS=Homo sapiens GN=LDLR PE=4 SV=1;>tr|J3KM	10	9	9	9	0	0	3	3	4	7	0	0	1	2	0	0	3	4	0	0	1	1	0	0	1	1	0	0	3	3	4	7	0	0	1	2	0	0	3	4	0	0
A0A024R7F1;K7ELL7;B4DJQ5;P14314;A0A0S2Z4D8;A0A0S2Z4W7;A0A0C4DGP4;A0A0S2Z4A0;K7EPW7;A2VCQ4;K7EKX1;K7EJ70;K7EIP3	A0A024R7F1;K7ELL7;B4DJQ5;P14314;A0A0S2Z4D8;A0A0S2Z4W7	14;14;14;14;11;11;6;5;5;5;3;3;1	14;14;14;14;11;11;6;5;5;5;3;3;1	14;14;14;14;11;11;6;5;5;5;3;3;1	Glucosidase 2 subunit beta	PRKCSH	>tr|A0A024R7F1|A0A024R7F1_HUMAN Protein kinase C substrate 80K-H, isoform CRA_a OS=Homo sapiens GN=PRKCSH PE=4 SV=1;>tr|K7ELL7|K7ELL7_HUMAN Glucosidase 2 subunit beta OS=Homo sapiens GN=PRKCSH PE=1 SV=1;>tr|B4DJQ5|B4DJQ5_HUMAN cDNA FLJ59211, highly similar	13	14	14	14	3	3	3	3	1	2	3	3	3	4	7	6	4	4	3	2	3	4	3	3	1	2	3	3	3	3	1	2	3	3	3	4	7	6	4	4	3	2
B4DRY5;A0A024R7F7;Q4LE60;A0A075B780;Q05D48;O14787;B3KPC8;K7ENW1;K7ESC1;K7ELC3	B4DRY5;A0A024R7F7;Q4LE60;A0A075B780;Q05D48;O14787;B3KPC8	11;11;11;10;10;10;9;1;1;1	6;6;6;6;6;6;6;0;0;0	6;6;6;6;6;6;6;0;0;0	Transportin-2	TNPO2;TNPO2 variant protein	>tr|B4DRY5|B4DRY5_HUMAN cDNA FLJ54538, highly similar to Transportin-2 OS=Homo sapiens PE=2 SV=1;>tr|A0A024R7F7|A0A024R7F7_HUMAN Transportin 2 (Importin 3, karyopherin beta 2b), isoform CRA_b OS=Homo sapiens GN=TNPO2 PE=4 SV=1;>tr|Q4LE60|Q4LE60_HUMAN TNPO2	10	11	6	6	2	2	3	3	6	6	4	4	3	3	0	0	4	5	2	2	2	2	2	2	3	3	1	1	1	1	3	3	2	2	1	1	0	0	1	2	0	0
A0A024R7F8;P13686	A0A024R7F8;P13686	2;2	2;2	2;2	Tartrate-resistant acid phosphatase type 5	ACP5	>tr|A0A024R7F8|A0A024R7F8_HUMAN Acid phosphatase 5, tartrate resistant, isoform CRA_a OS=Homo sapiens GN=ACP5 PE=4 SV=1;>sp|P13686|PPA5_HUMAN Tartrate-resistant acid phosphatase type 5 OS=Homo sapiens GN=ACP5 PE=1 SV=3	2	2	2	2	0	0	0	0	1	1	0	0	0	0	0	0	0	0	1	1	0	0	0	0	2	1	0	0	0	0	1	1	0	0	0	0	0	0	0	0	1	1
A0A024R7G2;O95716;B2R8W8;M0R257;Q96E17	A0A024R7G2;O95716;B2R8W8	19;19;17;5;4	19;19;17;5;4	12;12;10;0;0	Ras-related protein Rab-3D	RAB3D	>tr|A0A024R7G2|A0A024R7G2_HUMAN RAB3D, member RAS oncogene family, isoform CRA_b OS=Homo sapiens GN=RAB3D PE=4 SV=1;>sp|O95716|RAB3D_HUMAN Ras-related protein Rab-3D OS=Homo sapiens GN=RAB3D PE=1 SV=1;>tr|B2R8W8|B2R8W8_HUMAN cDNA, FLJ94098, highly similar	5	19	19	12	11	11	13	13	14	14	11	11	11	11	7	7	13	13	12	12	13	13	13	13	13	13	11	11	13	13	14	14	11	11	11	11	7	7	13	13	12	12
A5PKY0;A0A024R7G6;M0R165;A8K5P4;Q9UBC2;K7EJR2;M0R330;M0QX30;M0R1V5;M0R2S2;B4DQX5;B4DME4	A5PKY0;A0A024R7G6;M0R165;A8K5P4;Q9UBC2;K7EJR2;M0R330;M0QX30;M0R1V5;M0R2S2;B4DQX5;B4DME4	2;2;2;2;2;1;1;1;1;1;1;1	2;2;2;2;2;1;1;1;1;1;1;1	2;2;2;2;2;1;1;1;1;1;1;1	Epidermal growth factor receptor substrate 15-like 1	EPS15L1;SPATA22	>tr|A5PKY0|A5PKY0_HUMAN EPS15L1 protein (Fragment) OS=Homo sapiens GN=EPS15L1 PE=2 SV=1;>tr|A0A024R7G6|A0A024R7G6_HUMAN Epidermal growth factor receptor pathway substrate 15-like 1, isoform CRA_a OS=Homo sapiens GN=EPS15L1 PE=4 SV=1;>tr|M0R165|M0R165_HUMAN	12	2	2	2	0	0	0	0	0	0	0	0	0	0	0	0	1	1	0	0	1	1	0	0	0	0	0	0	0	0	0	0	0	0	0	0	0	0	1	1	0	0
A8K1J3;A0A024R7G8;P54725;K7ENJ0;K7ELW1;B4DDJ7;K7ELU6;K7EQ16	A8K1J3;A0A024R7G8;P54725;K7ENJ0;K7ELW1	6;6;6;4;4;2;1;1	4;4;4;2;2;2;1;1	4;4;4;2;2;2;1;1	UV excision repair protein RAD23 homolog A	RAD23A	>tr|A8K1J3|A8K1J3_HUMAN cDNA FLJ78534, highly similar to Homo sapiens RAD23 homolog A (S. cerevisiae), mRNA OS=Homo sapiens PE=2 SV=1;>tr|A0A024R7G8|A0A024R7G8_HUMAN RAD23 homolog A (S. cerevisiae), isoform CRA_a OS=Homo sapiens GN=RAD23A PE=4 SV=1;>sp|P54	8	6	4	4	1	1	2	4	2	2	1	1	2	1	2	1	2	2	2	2	1	1	2	2	3	3	0	0	1	2	1	1	0	0	1	0	0	0	1	1	1	1
A0A024R7H5;B4E0Z6;Q10589	A0A024R7H5;B4E0Z6;Q10589	3;3;3	3;3;3	3;3;3	Bone marrow stromal antigen 2	BST2	>tr|A0A024R7H5|A0A024R7H5_HUMAN Bone marrow stromal cell antigen 2, isoform CRA_a OS=Homo sapiens GN=BST2 PE=4 SV=1;>tr|B4E0Z6|B4E0Z6_HUMAN cDNA FLJ59809, highly similar to Bone marrow stromal antigen 2 OS=Homo sapiens PE=2 SV=1;>sp|Q10589|BST2_HUMAN Bone	3	3	3	3	1	1	1	1	1	1	1	1	0	0	0	0	0	0	0	0	0	0	1	1	0	0	1	1	1	1	1	1	1	1	0	0	0	0	0	0	0	0
A8K2I7;A0A024R7I0;O14908;A0A024R7I1;K7EM11;K7ESN1;K7ELJ2;REV__L8E7P6;Q8TF64	A8K2I7;A0A024R7I0;O14908;A0A024R7I1	7;7;7;4;3;2;1;1;1	7;7;7;4;3;2;1;1;1	7;7;7;4;3;2;1;1;1	PDZ domain-containing protein GIPC1	GIPC1	>tr|A8K2I7|A8K2I7_HUMAN cDNA FLJ76072, highly similar to Homo sapiens GIPC PDZ domain containing family, member 1 (GIPC1), transcript variant 1, mRNA OS=Homo sapiens PE=2 SV=1;>tr|A0A024R7I0|A0A024R7I0_HUMAN GIPC PDZ domain containing family, member 1, iso	9	7	7	7	0	1	2	1	3	3	0	1	1	1	1	1	0	0	2	2	1	1	4	3	2	3	0	1	2	1	3	3	0	1	1	1	1	1	0	0	2	2
A0A024R7I3;P61006;H0YLJ8;H0YL94	A0A024R7I3;P61006	12;12;2;2	8;8;1;1	7;7;0;0	Ras-related protein Rab-8A	RAB8A	>tr|A0A024R7I3|A0A024R7I3_HUMAN RAB8A, member RAS oncogene family, isoform CRA_a OS=Homo sapiens GN=RAB8A PE=4 SV=1;>sp|P61006|RAB8A_HUMAN Ras-related protein Rab-8A OS=Homo sapiens GN=RAB8A PE=1 SV=1	4	12	8	7	8	8	7	7	8	6	5	5	7	7	3	2	8	8	4	4	6	6	8	8	8	8	4	4	4	4	5	4	3	3	3	3	2	1	5	5	2	2
A0A024R7I7;P20336;B4DE50;S4R3Q3	A0A024R7I7;P20336;B4DE50;S4R3Q3	10;10;9;5	4;4;4;4	4;4;4;4	Ras-related protein Rab-3A	RAB3A	>tr|A0A024R7I7|A0A024R7I7_HUMAN H.sapiens ras-related Hrab3A protein OS=Homo sapiens GN=RAB3A PE=2 SV=1;>sp|P20336|RAB3A_HUMAN Ras-related protein Rab-3A OS=Homo sapiens GN=RAB3A PE=1 SV=1;>tr|B4DE50|B4DE50_HUMAN cDNA FLJ59582, highly similar to Ras-relate	4	10	4	4	2	2	4	4	7	6	5	5	3	3	1	1	5	4	4	5	4	4	5	5	6	7	0	0	0	0	4	4	3	3	0	0	0	0	1	0	1	2
A8K8B9;A0A024R7J0;P17612;Q15136;K7ERP6;B7Z708;P22612;K7EMV1;K7ENJ5	A8K8B9;A0A024R7J0;P17612;Q15136;K7ERP6;B7Z708	18;18;18;11;11;9;4;1;1	4;4;4;4;3;3;0;1;0	4;4;4;4;3;3;0;1;0	cAMP-dependent protein kinase catalytic subunit alpha	PRKACA;KIN27	>tr|A8K8B9|A8K8B9_HUMAN cDNA FLJ77368, highly similar to Homo sapiens protein kinase, cAMP-dependent, catalytic, alpha (PRKACA), transcript variant 2, mRNA OS=Homo sapiens PE=2 SV=1;>tr|A0A024R7J0|A0A024R7J0_HUMAN Protein kinase, cAMP-dependent, catalytic,	9	18	4	4	6	6	7	7	9	10	5	6	9	8	8	8	12	11	7	7	9	8	8	8	9	9	2	2	3	3	2	2	1	1	3	3	4	4	4	4	4	4
E7ENJ6;A0A024R7K8;Q59EK3;Q9BXS5;B4DN99;B3KNH5;B4DDG7;K7EJL1;K7ER75;K7EPJ8;K7ENA7;K7EQ90;K7EQX3;A0A087WZX7	E7ENJ6;A0A024R7K8;Q59EK3;Q9BXS5;B4DN99;B3KNH5;B4DDG7;K7EJL1	7;7;7;7;6;6;5;4;3;3;3;2;2;1	4;4;4;4;4;4;2;1;3;3;3;2;1;1	4;4;4;4;4;4;2;1;3;3;3;2;1;1	AP-1 complex subunit mu-1	AP1M1	>tr|E7ENJ6|E7ENJ6_HUMAN AP-1 complex subunit mu-1 OS=Homo sapiens GN=AP1M1 PE=1 SV=1;>tr|A0A024R7K8|A0A024R7K8_HUMAN Adaptor-related protein complex 1, mu 1 subunit, isoform CRA_a OS=Homo sapiens GN=AP1M1 PE=3 SV=1;>tr|Q59EK3|Q59EK3_HUMAN Adaptor-related p	14	7	4	4	1	0	1	1	5	6	2	2	2	2	0	0	3	3	1	1	2	2	1	1	1	1	0	0	0	0	3	4	2	2	2	2	0	0	2	2	0	0
A0A024R7L5;A0A024R7L8;Q92900;B3KY55;A0A059XG67;A0A059XBJ1;A0A059XAJ5;A0A059X4U2;A0A059XAL2	A0A024R7L5;A0A024R7L8;Q92900	18;18;18;4;2;2;2;2;1	18;18;18;4;2;2;2;2;1	18;18;18;4;2;2;2;2;1	Regulator of nonsense transcripts 1	UPF1	>tr|A0A024R7L5|A0A024R7L5_HUMAN UPF1 regulator of nonsense transcripts homolog (Yeast), isoform CRA_b OS=Homo sapiens GN=UPF1 PE=4 SV=1;>tr|A0A024R7L8|A0A024R7L8_HUMAN UPF1 regulator of nonsense transcripts homolog (Yeast), isoform CRA_a OS=Homo sapiens GN	9	18	18	18	0	0	2	3	12	13	4	4	2	3	0	0	7	6	3	4	4	5	3	3	4	4	0	0	2	3	12	13	4	4	2	3	0	0	7	6	3	4
E9PQA6;A0A024R7L6;Q96EY5;A8K0C2;E9PLL0;M0QZK6;E9PLZ8;E9PJW8	E9PQA6;A0A024R7L6;Q96EY5;A8K0C2;E9PLL0	7;7;7;6;4;3;2;1	7;7;7;6;4;3;2;1	7;7;7;6;4;3;2;1	Multivesicular body subunit 12A	MVB12A;LOC93343	>tr|E9PQA6|E9PQA6_HUMAN Multivesicular body subunit 12A OS=Homo sapiens GN=MVB12A PE=1 SV=1;>tr|A0A024R7L6|A0A024R7L6_HUMAN Uncharacterized protein OS=Homo sapiens GN=LOC93343 PE=4 SV=1;>sp|Q96EY5|MB12A_HUMAN Multivesicular body subunit 12A OS=Homo sapiens	8	7	7	7	1	1	3	2	6	6	2	2	1	1	1	1	3	3	1	1	1	2	3	3	2	2	1	1	3	2	6	6	2	2	1	1	1	1	3	3	1	1
B2R8A2;A0A024R7M0;Q9BVK6;B4DPP4	B2R8A2;A0A024R7M0;Q9BVK6	5;5;5;2	4;4;4;1	4;4;4;1	Transmembrane emp24 domain-containing protein 9	TMED9	>tr|B2R8A2|B2R8A2_HUMAN cDNA, FLJ93804, highly similar to Homo sapiens gp25L2 protein (HSGP25L2G), mRNA OS=Homo sapiens PE=2 SV=1;>tr|A0A024R7M0|A0A024R7M0_HUMAN Transmembrane emp24 protein transport domain containing 9, isoform CRA_a OS=Homo sapiens GN=TM	4	5	4	4	1	1	3	3	4	4	2	2	4	4	0	0	2	2	1	1	1	1	1	1	2	2	1	1	3	3	3	3	1	1	4	4	0	0	2	2	1	1
A0A024R7N7;P13284;A6XNE3;A8K686;Q9UPH8;M0QZG3	A0A024R7N7;P13284;A6XNE3;A8K686	3;3;2;2;1;1	3;3;2;2;1;1	3;3;2;2;1;1	Gamma-interferon-inducible lysosomal thiol reductase	IFI30	>tr|A0A024R7N7|A0A024R7N7_HUMAN Interferon, gamma-inducible protein 30, isoform CRA_b OS=Homo sapiens GN=IFI30 PE=4 SV=1;>sp|P13284|GILT_HUMAN Gamma-interferon-inducible lysosomal thiol reductase OS=Homo sapiens GN=IFI30 PE=1 SV=3;>tr|A6XNE3|A6XNE3_HUMAN I	6	3	3	3	0	0	2	1	0	1	1	1	1	1	0	0	0	1	0	0	1	0	0	0	1	1	0	0	2	1	0	1	1	1	1	1	0	0	0	1	0	0
A0A024R7R1;Q59H08;P52790	A0A024R7R1;Q59H08;P52790	2;2;2	2;2;2	2;2;2	Hexokinase-3	HK3	>tr|A0A024R7R1|A0A024R7R1_HUMAN Hexokinase 3 (White cell), isoform CRA_b OS=Homo sapiens GN=HK3 PE=3 SV=1;>tr|Q59H08|Q59H08_HUMAN Hexokinase 3 variant (Fragment) OS=Homo sapiens PE=3 SV=1;>sp|P52790|HXK3_HUMAN Hexokinase-3 OS=Homo sapiens GN=HK3 PE=1 SV=2	3	2	2	2	0	0	0	0	0	0	0	0	0	0	2	2	0	0	0	0	0	0	0	0	0	0	0	0	0	0	0	0	0	0	0	0	2	2	0	0	0	0
A0A024R7S3;P09497;D6RJD1	A0A024R7S3;P09497;D6RJD1	2;2;1	2;2;1	2;2;1	Clathrin light chain B	CLTB	>tr|A0A024R7S3|A0A024R7S3_HUMAN Clathrin, light polypeptide (Lcb), isoform CRA_c OS=Homo sapiens GN=CLTB PE=4 SV=1;>sp|P09497|CLCB_HUMAN Clathrin light chain B OS=Homo sapiens GN=CLTB PE=1 SV=1;>tr|D6RJD1|D6RJD1_HUMAN Clathrin light chain B (Fragment) OS=H	3	2	2	2	0	1	1	1	0	0	0	0	2	2	0	0	2	2	0	0	1	1	1	1	1	1	0	1	1	1	0	0	0	0	2	2	0	0	2	2	0	0
G3V126;A0A024R7X3;A0A024R7U9;Q9UI12;B4E054;B3KUZ7;Q8TF11;E5RG49;E5RHH0	G3V126;A0A024R7X3;A0A024R7U9;Q9UI12;B4E054;B3KUZ7;Q8TF11	15;15;15;15;14;14;11;2;2	15;15;15;15;14;14;11;2;2	15;15;15;15;14;14;11;2;2	V-type proton ATPase subunit H	ATP6V1H	>tr|G3V126|G3V126_HUMAN ATPase, H+ transporting, lysosomal 50/57kDa, V1 subunit H, isoform CRA_c OS=Homo sapiens GN=ATP6V1H PE=1 SV=1;>tr|A0A024R7X3|A0A024R7X3_HUMAN ATPase, H+ transporting, lysosomal 50/57kDa, V1 subunit H, isoform CRA_b OS=Homo sapiens G	9	15	15	15	2	3	8	9	8	8	3	4	5	3	0	0	8	8	4	4	4	4	6	6	6	5	2	3	8	9	8	8	3	4	5	3	0	0	8	8	4	4
A0A024R7V6;P61019;A0A0A1HAW1;H7C125;O75546;H0YD31;E9PE37;Q9UL31;H0YDL5;A0A1D5RMT4;Q6PIK3	A0A024R7V6;P61019;A0A0A1HAW1	20;20;15;8;7;6;5;4;2;1;1	20;20;15;8;7;6;5;4;2;1;1	4;4;3;3;3;0;0;0;0;0;0	Ras-related protein Rab-2A	RAB2;RAB2A	>tr|A0A024R7V6|A0A024R7V6_HUMAN RAB2, member RAS oncogene family, isoform CRA_a OS=Homo sapiens GN=RAB2 PE=4 SV=1;>sp|P61019|RAB2A_HUMAN Ras-related protein Rab-2A OS=Homo sapiens GN=RAB2A PE=1 SV=1;>tr|A0A0A1HAW1|A0A0A1HAW1_HUMAN H.sapiens ras-related Hra	11	20	20	4	11	11	13	13	16	16	7	7	14	14	8	8	15	14	9	10	9	9	11	11	14	16	11	11	13	13	16	16	7	7	14	14	8	8	15	14	9	10
A0A024R7W9;Q92905;Q59GH5;E5RHH5;E5RHF2;E5RFS1;E5RG35;E5RK55;H0UI27	A0A024R7W9;Q92905;Q59GH5;E5RHH5	10;10;8;5;3;1;1;1;1	10;10;8;5;3;1;1;1;1	10;10;8;5;3;1;1;1;1	COP9 signalosome complex subunit 5	COPS5	>tr|A0A024R7W9|A0A024R7W9_HUMAN COP9 constitutive photomorphogenic homolog subunit 5 (Arabidopsis), isoform CRA_a OS=Homo sapiens GN=COPS5 PE=2 SV=1;>sp|Q92905|CSN5_HUMAN COP9 signalosome complex subunit 5 OS=Homo sapiens GN=COPS5 PE=1 SV=4;>tr|Q59GH5|Q59G	9	10	10	10	2	4	5	6	6	6	2	2	6	6	1	1	5	6	3	3	4	4	3	4	5	5	2	4	5	6	6	6	2	2	6	6	1	1	5	6	3	3
A0A024R7X0;Q9Y6D6;Q59FY5;E5RIF2;E5RHL7;B3KMS9;E5RHZ1	A0A024R7X0;Q9Y6D6;Q59FY5;E5RIF2;E5RHL7	16;16;13;13;10;7;2	4;4;4;4;3;2;2	4;4;4;4;3;2;2	Brefeldin A-inhibited guanine nucleotide-exchange protein 1	ARFGEF1	>tr|A0A024R7X0|A0A024R7X0_HUMAN ADP-ribosylation factor guanine nucleotide-exchange factor 1(Brefeldin A-inhibited), isoform CRA_a OS=Homo sapiens GN=ARFGEF1 PE=4 SV=1;>sp|Q9Y6D6|BIG1_HUMAN Brefeldin A-inhibited guanine nucleotide-exchange protein 1 OS=Hom	7	16	4	4	2	2	6	6	8	8	8	7	6	6	2	2	6	6	2	2	1	2	5	5	4	4	0	0	2	2	0	0	2	2	0	0	0	0	1	1	0	0
E5RHG8;A0A024R7Y5;Q15369;R4GMY8	E5RHG8;A0A024R7Y5;Q15369;R4GMY8	7;7;7;4	7;7;7;4	7;7;7;4	Transcription elongation factor B polypeptide 1	TCEB1	>tr|E5RHG8|E5RHG8_HUMAN Transcription elongation factor B polypeptide 1 (Fragment) OS=Homo sapiens GN=TCEB1 PE=1 SV=1;>tr|A0A024R7Y5|A0A024R7Y5_HUMAN Transcription elongation factor B (SIII), polypeptide 1 (15kDa, elongin C), isoform CRA_a OS=Homo sapiens	4	7	7	7	0	0	2	2	6	6	3	3	0	0	0	0	2	2	1	1	3	3	0	0	2	2	0	0	2	2	6	6	3	3	0	0	0	0	2	2	1	1
A0A024R7Z5;O00560;B4DHN5;E9PBU7;B4DQ93	A0A024R7Z5;O00560;B4DHN5;E9PBU7;B4DQ93	17;17;12;12;12	17;17;12;12;12	3;3;1;1;1	Syntenin-1	SDCBP	>tr|A0A024R7Z5|A0A024R7Z5_HUMAN Syndecan binding protein (Syntenin), isoform CRA_c OS=Homo sapiens GN=SDCBP PE=4 SV=1;>sp|O00560|SDCB1_HUMAN Syntenin-1 OS=Homo sapiens GN=SDCBP PE=1 SV=1;>tr|B4DHN5|B4DHN5_HUMAN Syntenin-1 OS=Homo sapiens GN=SDCBP PE=1 SV=1	5	17	17	3	5	6	7	9	16	16	10	10	6	6	5	6	10	8	5	6	7	7	4	5	9	10	5	6	7	9	16	16	10	10	6	6	5	6	10	8	5	6
Q9UGN0;A0A024R7Z9;H7BYW6;A8K852;P04085;Q32M96;A0A0A0MSC4	Q9UGN0;A0A024R7Z9;H7BYW6;A8K852;P04085;Q32M96	3;3;3;3;3;2;1	3;3;3;3;3;2;1	3;3;3;3;3;2;1	Platelet-derived growth factor subunit A	PDGFA	>tr|Q9UGN0|Q9UGN0_HUMAN Platelet-derived growth factor A chain (Fragment) OS=Homo sapiens GN=PDGFA PE=4 SV=1;>tr|A0A024R7Z9|A0A024R7Z9_HUMAN Platelet-derived growth factor alpha polypeptide, isoform CRA_a OS=Homo sapiens GN=PDGFA PE=3 SV=1;>tr|H7BYW6|H7BYW	7	3	3	3	0	0	1	0	1	1	0	0	0	0	1	1	0	0	0	0	1	0	1	1	2	2	0	0	1	0	1	1	0	0	0	0	1	1	0	0	0	0
A0A024R811;Q53H82	A0A024R811;Q53H82	3;3	3;3	3;3	Beta-lactamase-like protein 2	LACTB2	>tr|A0A024R811|A0A024R811_HUMAN Lactamase, beta 2, isoform CRA_a OS=Homo sapiens GN=LACTB2 PE=2 SV=1;>sp|Q53H82|LACB2_HUMAN Endoribonuclease LACTB2 OS=Homo sapiens GN=LACTB2 PE=1 SV=2	2	3	3	3	0	0	0	0	0	0	0	0	1	2	0	0	2	2	0	0	0	0	0	0	0	0	0	0	0	0	0	0	0	0	1	2	0	0	2	2	0	0
A0A024R814;P18124;A8MUD9;O95036;C9JIJ5;C9JZ88;Q59FH1;H0Y4W2;F2Z2U4;Q9Y4A5	A0A024R814;P18124;A8MUD9;O95036	10;10;9;7;4;3;1;1;1;1	10;10;9;7;4;3;1;1;1;1	10;10;9;7;4;3;1;1;1;1	60S ribosomal protein L7	RPL7;WUGSC:H_RG054D04.1	>tr|A0A024R814|A0A024R814_HUMAN Ribosomal protein L7, isoform CRA_a OS=Homo sapiens GN=RPL7 PE=4 SV=1;>sp|P18124|RL7_HUMAN 60S ribosomal protein L7 OS=Homo sapiens GN=RPL7 PE=1 SV=1;>tr|A8MUD9|A8MUD9_HUMAN 60S ribosomal protein L7 OS=Homo sapiens GN=RPL7 P	10	10	10	10	2	1	6	7	5	6	2	2	4	2	1	1	5	5	2	1	1	1	2	2	5	6	2	1	6	7	5	6	2	2	4	2	1	1	5	5	2	1
A0A024R816;Q9C0H2;H7C3T6;Q69YH1	A0A024R816;Q9C0H2	10;10;4;1	10;10;4;1	10;10;4;1	Protein tweety homolog;Protein tweety homolog 3	TTYH3	>tr|A0A024R816|A0A024R816_HUMAN Protein tweety homolog OS=Homo sapiens GN=TTYH3 PE=3 SV=1;>sp|Q9C0H2|TTYH3_HUMAN Protein tweety homolog 3 OS=Homo sapiens GN=TTYH3 PE=1 SV=3	4	10	10	10	0	0	1	1	9	9	2	2	1	1	0	0	1	1	1	1	1	1	2	2	1	1	0	0	1	1	9	9	2	2	1	1	0	0	1	1	1	1
B4DV79;A4D210;A0A024R821;P55884;B4DXN6;Q96G38;Q86UM1;C9JQN7;Q59FS8;C9JZG1	B4DV79;A4D210;A0A024R821;P55884;B4DXN6;Q96G38	14;14;14;14;13;12;6;4;4;4	14;14;14;14;13;12;6;4;4;4	14;14;14;14;13;12;6;4;4;4	Eukaryotic translation initiation factor 3 subunit B	EIF3B;EIF3S9	>tr|B4DV79|B4DV79_HUMAN Eukaryotic translation initiation factor 3 subunit B OS=Homo sapiens GN=EIF3B PE=2 SV=1;>tr|A4D210|A4D210_HUMAN Eukaryotic translation initiation factor 3 subunit B OS=Homo sapiens GN=EIF3S9 PE=3 SV=1;>tr|A0A024R821|A0A024R821_HUMAN	10	14	14	14	1	1	3	3	8	9	0	0	0	0	0	0	5	5	0	0	3	2	0	0	5	5	1	1	3	3	8	9	0	0	0	0	0	0	5	5	0	0
A0A024R824;O15431;Q6P708;Q9BT69	A0A024R824;O15431;Q6P708	3;3;2;1	3;3;2;1	3;3;2;1	High affinity copper uptake protein 1	SLC31A1	>tr|A0A024R824|A0A024R824_HUMAN Solute carrier family 31 (Copper transporters), member 1, isoform CRA_a OS=Homo sapiens GN=SLC31A1 PE=4 SV=1;>sp|O15431|COPT1_HUMAN High affinity copper uptake protein 1 OS=Homo sapiens GN=SLC31A1 PE=1 SV=1;>tr|Q6P708|Q6P708	4	3	3	3	1	1	2	2	2	2	1	1	2	1	1	1	2	2	1	1	1	1	2	1	2	2	1	1	2	2	2	2	1	1	2	1	1	1	2	2	1	1
A0A024R830;A0A140VJL8;P29218;H0YBL1;E5RG13;E5RIP7;E5RG94;E5RIF4;E5RHE9;E5RI82;E5RGY4	A0A024R830;A0A140VJL8;P29218;H0YBL1;E5RG13;E5RIP7	9;9;9;8;6;6;4;4;4;4;4	9;9;9;8;6;6;4;4;4;4;4	9;9;9;8;6;6;4;4;4;4;4	Inositol monophosphatase 1	IMPA1	>tr|A0A024R830|A0A024R830_HUMAN Inositol(Myo)-1(Or 4)-monophosphatase 1, isoform CRA_a OS=Homo sapiens GN=IMPA1 PE=4 SV=1;>tr|A0A140VJL8|A0A140VJL8_HUMAN Testicular tissue protein Li 94 OS=Homo sapiens PE=2 SV=1;>sp|P29218|IMPA1_HUMAN Inositol monophosphat	11	9	9	9	6	6	3	3	5	4	1	1	5	5	1	2	6	5	4	3	3	3	3	4	3	3	6	6	3	3	5	4	1	1	5	5	1	2	6	5	4	3
A0A024R845;P61106;X6RFL8	A0A024R845;P61106;X6RFL8	20;20;17	20;20;17	20;20;17	Ras-related protein Rab-14	RAB14	>tr|A0A024R845|A0A024R845_HUMAN RAB14, member RAS oncogene family, isoform CRA_a OS=Homo sapiens GN=RAB14 PE=4 SV=1;>sp|P61106|RAB14_HUMAN Ras-related protein Rab-14 OS=Homo sapiens GN=RAB14 PE=1 SV=4;>tr|X6RFL8|X6RFL8_HUMAN Ras-related protein Rab-14 (Fra	3	20	20	20	9	8	9	11	15	15	9	9	13	12	8	8	11	11	9	8	9	8	8	9	8	8	9	8	9	11	15	15	9	9	13	12	8	8	11	11	9	8
Q53FU0;A0A024R860;Q9NRB3;Q53FS1;C9J991	Q53FU0;A0A024R860;Q9NRB3;Q53FS1	4;4;4;3;1	4;4;4;3;1	4;4;4;3;1	Carbohydrate sulfotransferase 12	CHST12	>tr|Q53FU0|Q53FU0_HUMAN Carbohydrate (Chondroitin 4) sulfotransferase 12 variant (Fragment) OS=Homo sapiens PE=2 SV=1;>tr|A0A024R860|A0A024R860_HUMAN Carbohydrate (Chondroitin 4) sulfotransferase 12, isoform CRA_b OS=Homo sapiens GN=CHST12 PE=4 SV=1;>sp|Q9	5	4	4	4	0	0	1	1	3	2	0	0	0	0	0	0	0	0	0	0	0	0	0	0	0	0	0	0	1	1	3	2	0	0	0	0	0	0	0	0	0	0
A0A024R861;O00743;B7Z3E2;A0A0S2Z482	A0A024R861;O00743;B7Z3E2	9;9;5;1	9;9;5;1	7;7;5;1	Serine/threonine-protein phosphatase;Serine/threonine-protein phosphatase 6 catalytic subunit;Serine/threonine-protein phosphatase 6 catalytic subunit, N-terminally processed	PPP6C	>tr|A0A024R861|A0A024R861_HUMAN Serine/threonine-protein phosphatase OS=Homo sapiens GN=PPP6C PE=2 SV=1;>sp|O00743|PPP6_HUMAN Serine/threonine-protein phosphatase 6 catalytic subunit OS=Homo sapiens GN=PPP6C PE=1 SV=1;>tr|B7Z3E2|B7Z3E2_HUMAN cDNA FLJ50777,	4	9	9	7	2	2	2	3	6	9	0	0	0	1	0	0	2	2	0	0	1	1	2	2	1	1	2	2	2	3	6	9	0	0	0	1	0	0	2	2	0	0
F8W9S7;A0A024R875;A0A024R862;A0A024R8A2;B3KTX2;B3KN67;Q14C86;B3KMM3;B0QZ65;A0A0A0MQV8;B4DGD8;H0Y4E7;H0Y7I9;C9IZ08;B4DK42	F8W9S7;A0A024R875;A0A024R862;A0A024R8A2;B3KTX2;B3KN67;Q14C86	4;4;4;4;3;3;3;1;1;1;1;1;1;1;1	4;4;4;4;3;3;3;1;1;1;1;1;1;1;1	4;4;4;4;3;3;3;1;1;1;1;1;1;1;1	GTPase-activating protein and VPS9 domain-containing protein 1	GAPVD1	>tr|F8W9S7|F8W9S7_HUMAN GTPase-activating protein and VPS9 domain-containing protein 1 OS=Homo sapiens GN=GAPVD1 PE=1 SV=1;>tr|A0A024R875|A0A024R875_HUMAN GTPase activating protein and VPS9 domains 1, isoform CRA_a OS=Homo sapiens GN=GAPVD1 PE=4 SV=1;>tr|A	15	4	4	4	0	0	2	2	2	2	0	0	0	0	0	0	1	1	0	0	0	0	1	1	0	0	0	0	2	2	2	2	0	0	0	0	0	0	1	1	0	0
F2Z388;A0A024R866;P42766;A4D2M5	F2Z388;A0A024R866;P42766;A4D2M5	2;2;2;1	2;2;2;1	2;2;2;1	60S ribosomal protein L35	RPL35;LOC154880	>tr|F2Z388|F2Z388_HUMAN 60S ribosomal protein L35 OS=Homo sapiens GN=RPL35 PE=1 SV=1;>tr|A0A024R866|A0A024R866_HUMAN Ribosomal protein L35, isoform CRA_a OS=Homo sapiens GN=RPL35 PE=3 SV=1;>sp|P42766|RL35_HUMAN 60S ribosomal protein L35 OS=Homo sapiens GN=	4	2	2	2	1	1	1	1	1	1	0	0	0	0	0	0	2	2	0	0	2	2	1	1	1	1	1	1	1	1	1	1	0	0	0	0	0	0	2	2	0	0
A0A024R870;Q6UWE0	A0A024R870;Q6UWE0	14;14	14;14	14;14	E3 ubiquitin-protein ligase LRSAM1	LRSAM1	>tr|A0A024R870|A0A024R870_HUMAN Leucine rich repeat and sterile alpha motif containing 1, isoform CRA_a OS=Homo sapiens GN=LRSAM1 PE=4 SV=1;>sp|Q6UWE0|LRSM1_HUMAN E3 ubiquitin-protein ligase LRSAM1 OS=Homo sapiens GN=LRSAM1 PE=1 SV=1	2	14	14	14	1	0	2	3	1	2	4	4	0	1	0	0	6	6	1	1	0	0	0	0	3	2	1	0	2	3	1	2	4	4	0	1	0	0	6	6	1	1
A0A024R872;Q96TA1;Q9H8K1;Q2YD88;Q9H6L6	A0A024R872;Q96TA1	32;32;14;6;1	32;32;14;6;1	32;32;14;6;1	Niban-like protein 1	C9orf88;FAM129B	>tr|A0A024R872|A0A024R872_HUMAN Chromosome 9 open reading frame 88, isoform CRA_a OS=Homo sapiens GN=C9orf88 PE=4 SV=1;>sp|Q96TA1|NIBL1_HUMAN Niban-like protein 1 OS=Homo sapiens GN=FAM129B PE=1 SV=3	5	32	32	32	7	7	14	14	19	21	11	10	12	11	3	2	18	18	9	9	6	6	14	14	15	16	7	7	14	14	19	21	11	10	12	11	3	2	18	18	9	9
A6NJX0;A8K7N4;A0A024R881;Q9H4F1	A6NJX0;A8K7N4;A0A024R881;Q9H4F1	2;2;2;2	2;2;2;2	2;2;2;2	Alpha-N-acetyl-neuraminyl-2,3-beta-galactosyl-1,3-N-acetyl-galactosaminide alpha-2,6-sialyltransferase	ST6GALNAC4	>tr|A6NJX0|A6NJX0_HUMAN Alpha-N-acetyl-neuraminyl-2,3-beta-galactosyl-1,3-N-acetyl-galactosaminide alpha-2,6-sialyltransferase (Fragment) OS=Homo sapiens GN=ST6GALNAC4 PE=1 SV=9;>tr|A8K7N4|A8K7N4_HUMAN ST6 (Alpha-N-acetyl-neuraminyl-2,3-beta-galactosyl-1,	4	2	2	2	0	0	0	0	1	1	0	0	0	0	0	0	0	0	1	1	0	1	0	0	0	0	0	0	0	0	1	1	0	0	0	0	0	0	0	0	1	1
A0A024R882;P27105;B4E2V5;B4DZK8;F8VSL7;B4E310	A0A024R882;P27105;B4E2V5;B4DZK8	9;9;8;8;3;3	9;9;8;8;3;3	9;9;8;8;3;3	Erythrocyte band 7 integral membrane protein	STOM	>tr|A0A024R882|A0A024R882_HUMAN Stomatin, isoform CRA_a OS=Homo sapiens GN=STOM PE=4 SV=1;>sp|P27105|STOM_HUMAN Erythrocyte band 7 integral membrane protein OS=Homo sapiens GN=STOM PE=1 SV=3;>tr|B4E2V5|B4E2V5_HUMAN cDNA FLJ52062, highly similar to Erythroc	6	9	9	9	1	1	4	3	4	5	1	1	1	2	3	1	2	2	1	1	0	0	0	0	1	0	1	1	4	3	4	5	1	1	1	2	3	1	2	2	1	1
A0A024R883;O75348;F2Z307;O95670	A0A024R883;O75348	6;6;1;1	6;6;1;1	6;6;1;1	V-type proton ATPase subunit G 1	ATP6V1G1	>tr|A0A024R883|A0A024R883_HUMAN ATPase, H+ transporting, lysosomal 13kDa, V1 subunit G1, isoform CRA_a OS=Homo sapiens GN=ATP6V1G1 PE=4 SV=1;>sp|O75348|VATG1_HUMAN V-type proton ATPase subunit G 1 OS=Homo sapiens GN=ATP6V1G1 PE=1 SV=3	4	6	6	6	2	2	2	2	3	2	3	3	3	3	0	1	3	2	2	2	1	1	2	2	2	1	2	2	2	2	3	2	3	3	3	3	0	1	3	2	2	2
A0A024R889;A0A0D9SF54;A0A0D9SGF6;Q13813;Q9UG16;B4DGT1;B4DTV8;A0A0D9SFH4;Q14917	A0A024R889;A0A0D9SF54;A0A0D9SGF6;Q13813;Q9UG16	16;16;16;16;8;7;6;1;1	16;16;16;16;8;7;6;1;1	16;16;16;16;8;7;6;1;1	Spectrin alpha chain, non-erythrocytic 1	SPTAN1;DKFZp564P0562	>tr|A0A024R889|A0A024R889_HUMAN Spectrin, alpha, non-erythrocytic 1 (Alpha-fodrin), isoform CRA_g OS=Homo sapiens GN=SPTAN1 PE=4 SV=1;>tr|A0A0D9SF54|A0A0D9SF54_HUMAN Spectrin alpha chain, non-erythrocytic 1 OS=Homo sapiens GN=SPTAN1 PE=1 SV=1;>tr|A0A0D9SGF	9	16	16	16	0	0	0	0	3	3	2	1	3	3	1	0	6	6	5	4	1	1	0	2	2	2	0	0	0	0	3	3	2	1	3	3	1	0	6	6	5	4
A0A024R896;B7ZC38;Q9NR46;B7ZC39;F8WFB9;Q71RA6;H7C1Z6	A0A024R896;B7ZC38;Q9NR46;B7ZC39	11;11;11;10;4;4;1	11;11;11;10;4;4;1	10;10;10;9;3;4;1	Endophilin-B2	SH3GLB2	>tr|A0A024R896|A0A024R896_HUMAN SH3-domain GRB2-like endophilin B2, isoform CRA_a OS=Homo sapiens GN=SH3GLB2 PE=4 SV=1;>tr|B7ZC38|B7ZC38_HUMAN Endophilin-B2 OS=Homo sapiens GN=SH3GLB2 PE=1 SV=1;>sp|Q9NR46|SHLB2_HUMAN Endophilin-B2 OS=Homo sapiens GN=SH3GLB	7	11	11	10	1	1	2	3	4	5	1	1	0	0	0	0	3	4	2	2	3	3	4	4	1	1	1	1	2	3	4	5	1	1	0	0	0	0	3	4	2	2
B3KPC7;A0A024R897;Q9BPX5	B3KPC7;A0A024R897;Q9BPX5	2;2;2	1;1;1	1;1;1	Actin-related protein 2/3 complex subunit 5;Actin-related protein 2/3 complex subunit 5-like protein	ARPC5L	>tr|B3KPC7|B3KPC7_HUMAN Actin-related protein 2/3 complex subunit 5 OS=Homo sapiens PE=2 SV=1;>tr|A0A024R897|A0A024R897_HUMAN Actin-related protein 2/3 complex subunit 5 OS=Homo sapiens GN=ARPC5L PE=3 SV=1;>sp|Q9BPX5|ARP5L_HUMAN Actin-related protein 2/3 c	3	2	1	1	0	0	0	0	0	0	0	0	0	0	0	0	0	0	1	1	0	1	0	0	0	0	0	0	0	0	0	0	0	0	0	0	0	0	0	0	0	0
B7Z1P9;A0A024R8B8;Q9H7P6;F8W922;Q9H7N7;B7Z4X0	B7Z1P9;A0A024R8B8;Q9H7P6;F8W922;Q9H7N7	6;6;6;4;3;2	6;6;6;4;3;2	6;6;6;4;3;2	Multivesicular body subunit 12B	C9orf28;MVB12B;FLJ00031	>tr|B7Z1P9|B7Z1P9_HUMAN cDNA FLJ53722 OS=Homo sapiens PE=2 SV=1;>tr|A0A024R8B8|A0A024R8B8_HUMAN Chromosome 9 open reading frame 28, isoform CRA_a OS=Homo sapiens GN=C9orf28 PE=4 SV=1;>sp|Q9H7P6|MB12B_HUMAN Multivesicular body subunit 12B OS=Homo sapiens GN	6	6	6	6	1	1	0	0	6	6	0	0	0	0	0	0	0	0	0	0	0	0	1	1	0	1	1	1	0	0	6	6	0	0	0	0	0	0	0	0	0	0
A0A024R8C7;Q9BTM9	A0A024R8C7;Q9BTM9	3;3	3;3	3;3	Ubiquitin-related modifier 1	C9orf74;URM1	>tr|A0A024R8C7|A0A024R8C7_HUMAN Ubiquitin-related modifier 1 OS=Homo sapiens GN=C9orf74 PE=3 SV=1;>sp|Q9BTM9|URM1_HUMAN Ubiquitin-related modifier 1 OS=Homo sapiens GN=URM1 PE=1 SV=1	2	3	3	3	0	0	1	1	3	3	0	0	0	0	0	0	1	1	1	1	1	1	0	0	1	1	0	0	1	1	3	3	0	0	0	0	0	0	1	1	1	1
A0A024R8C8;Q9NVG8;A0A024R8B1;Q59F95;B4DHM6	A0A024R8C8;Q9NVG8;A0A024R8B1;Q59F95	5;5;4;4;1	5;5;4;4;1	5;5;4;4;1	TBC1 domain family member 13	TBC1D13	>tr|A0A024R8C8|A0A024R8C8_HUMAN TBC1 domain family, member 13, isoform CRA_a OS=Homo sapiens GN=TBC1D13 PE=4 SV=1;>sp|Q9NVG8|TBC13_HUMAN TBC1 domain family member 13 OS=Homo sapiens GN=TBC1D13 PE=1 SV=3;>tr|A0A024R8B1|A0A024R8B1_HUMAN TBC1 domain family, m	5	5	5	5	1	1	0	0	2	2	0	0	0	0	0	0	1	1	1	1	0	1	0	1	1	2	1	1	0	0	2	2	0	0	0	0	0	0	1	1	1	1
A0A024R8D7;P31025;Q5VSP4	A0A024R8D7;P31025	3;3;1	3;3;1	3;3;1	Lipocalin-1	LCN1	>tr|A0A024R8D7|A0A024R8D7_HUMAN Lipocalin 1 (Tear prealbumin), isoform CRA_a OS=Homo sapiens GN=LCN1 PE=4 SV=1;>sp|P31025|LCN1_HUMAN Lipocalin-1 OS=Homo sapiens GN=LCN1 PE=1 SV=1	3	3	3	3	1	1	0	0	0	0	1	1	0	0	1	1	1	1	0	0	0	0	1	1	0	0	1	1	0	0	0	0	1	1	0	0	1	1	1	1	0	0
A0A024R8E4;Q9BV86	A0A024R8E4;Q9BV86	2;2	2;2	2;2	N-terminal Xaa-Pro-Lys N-methyltransferase 1;N-terminal Xaa-Pro-Lys N-methyltransferase 1, N-terminally processed	C9orf32;NTMT1	>tr|A0A024R8E4|A0A024R8E4_HUMAN Chromosome 9 open reading frame 32, isoform CRA_a OS=Homo sapiens GN=C9orf32 PE=4 SV=1;>sp|Q9BV86|NTM1A_HUMAN N-terminal Xaa-Pro-Lys N-methyltransferase 1 OS=Homo sapiens GN=NTMT1 PE=1 SV=3	2	2	2	2	0	0	0	0	1	1	0	0	1	1	0	0	1	1	0	0	0	0	0	0	0	0	0	0	0	0	1	1	0	0	1	1	0	0	1	1	0	0
A0A024R8F2;Q96E40	A0A024R8F2;Q96E40	5;5	5;5	5;5	Uncharacterized protein C9orf9	C9orf9	>tr|A0A024R8F2|A0A024R8F2_HUMAN Chromosome 9 open reading frame 9, isoform CRA_a OS=Homo sapiens GN=C9orf9 PE=4 SV=1;>sp|Q96E40|SACA9_HUMAN Sperm acrosome-associated protein 9 OS=Homo sapiens GN=SPACA9 PE=1 SV=1	2	5	5	5	1	0	0	0	5	5	1	0	1	1	1	1	1	1	1	1	0	0	0	0	0	0	1	0	0	0	5	5	1	0	1	1	1	1	1	1	1	1
A0A024R8G3;P41222;Q5SQ11;H0Y5A1	A0A024R8G3;P41222;Q5SQ11;H0Y5A1	5;5;4;3	5;5;4;3	5;5;4;3	Prostaglandin-H2 D-isomerase	PTGDS	>tr|A0A024R8G3|A0A024R8G3_HUMAN Prostaglandin D2 synthase 21kDa (Brain), isoform CRA_a OS=Homo sapiens GN=PTGDS PE=2 SV=1;>sp|P41222|PTGDS_HUMAN Prostaglandin-H2 D-isomerase OS=Homo sapiens GN=PTGDS PE=1 SV=1;>tr|Q5SQ11|Q5SQ11_HUMAN Prostaglandin-H2 D-isom	4	5	5	5	3	3	1	1	4	4	2	2	4	4	3	3	2	1	1	1	1	1	0	0	1	1	3	3	1	1	4	4	2	2	4	4	3	3	2	1	1	1
A0A024R8G6;O43805;A0A087WV26	A0A024R8G6;O43805	3;3;1	3;3;1	3;3;1	Sjoegren syndrome nuclear autoantigen 1	SSNA1	>tr|A0A024R8G6|A0A024R8G6_HUMAN Sjogrens syndrome nuclear autoantigen 1, isoform CRA_a OS=Homo sapiens GN=SSNA1 PE=4 SV=1;>sp|O43805|SSNA1_HUMAN Sjoegren syndrome nuclear autoantigen 1 OS=Homo sapiens GN=SSNA1 PE=1 SV=2	3	3	3	3	0	0	0	0	3	3	0	0	0	0	0	0	0	0	1	0	0	0	0	0	0	0	0	0	0	0	3	3	0	0	0	0	0	0	0	0	1	0
J9JIG6;B4DQ74;A0A024R8K1;Q96EG1	J9JIG6;B4DQ74;A0A024R8K1;Q96EG1	2;2;2;2	2;2;2;2	2;2;2;2	Arylsulfatase G	ARSG	>tr|J9JIG6|J9JIG6_HUMAN Arylsulfatase G OS=Homo sapiens GN=ARSG PE=1 SV=1;>tr|B4DQ74|B4DQ74_HUMAN cDNA FLJ59825, highly similar to Arylsulfatase G (EC 3.1.6.-) OS=Homo sapiens PE=2 SV=1;>tr|A0A024R8K1|A0A024R8K1_HUMAN Arylsulfatase G, isoform CRA_a OS=Homo	4	2	2	2	0	0	0	0	0	0	0	0	0	0	0	0	2	2	0	0	0	0	0	0	0	0	0	0	0	0	0	0	0	0	0	0	0	0	2	2	0	0
K7ENL2;K7EMC9;Q7Z511;A0A024R8L1;Q969T9;K7EIJ0;B4DFL8;B4DFG2;B4DV07;A6NG10;K7EIN1;K7ESN4;K7EIK1	K7ENL2;K7EMC9;Q7Z511;A0A024R8L1;Q969T9;K7EIJ0;B4DFL8;B4DFG2;B4DV07;A6NG10	5;5;5;5;5;4;4;4;4;4;1;1;1	5;5;5;5;5;4;4;4;4;4;1;1;1	5;5;5;5;5;4;4;4;4;4;1;1;1	WW domain-binding protein 2	WBP2	>tr|K7ENL2|K7ENL2_HUMAN WW domain-binding protein 2 OS=Homo sapiens GN=WBP2 PE=1 SV=1;>tr|K7EMC9|K7EMC9_HUMAN WW domain-binding protein 2 OS=Homo sapiens GN=WBP2 PE=1 SV=1;>tr|Q7Z511|Q7Z511_HUMAN WW-domain binding protein 2 OS=Homo sapiens PE=2 SV=1;>tr|A0	13	5	5	5	1	1	1	1	3	2	1	1	2	1	0	0	1	2	0	0	1	1	1	1	1	1	1	1	1	1	3	2	1	1	2	1	0	0	1	2	0	0
A0A024R8M0;Q14344;B4DWV9	A0A024R8M0;Q14344;B4DWV9	13;13;10	12;12;10	12;12;10	Guanine nucleotide-binding protein subunit alpha-13	GNA13	>tr|A0A024R8M0|A0A024R8M0_HUMAN Guanine nucleotide binding protein (G protein), alpha 13, isoform CRA_a OS=Homo sapiens GN=GNA13 PE=4 SV=1;>sp|Q14344|GNA13_HUMAN Guanine nucleotide-binding protein subunit alpha-13 OS=Homo sapiens GN=GNA13 PE=1 SV=2;>tr|B4D	3	13	12	12	4	4	5	5	8	8	0	0	1	3	1	1	6	5	4	5	1	2	7	7	4	4	3	3	4	4	7	7	0	0	1	2	1	1	5	4	4	5
A0A024R8M4;Q14558;C9JNQ3;C9J168;B4DP31;C9JKT9;C9JUN4	A0A024R8M4;Q14558;C9JNQ3;C9J168;B4DP31	6;6;3;3;3;1;1	5;5;3;2;2;1;1	5;5;3;2;2;1;1	Phosphoribosyl pyrophosphate synthase-associated protein 1	PRPSAP1	>tr|A0A024R8M4|A0A024R8M4_HUMAN Phosphoribosyl pyrophosphate synthetase-associated protein 1, isoform CRA_a OS=Homo sapiens GN=PRPSAP1 PE=4 SV=1;>sp|Q14558|KPRA_HUMAN Phosphoribosyl pyrophosphate synthase-associated protein 1 OS=Homo sapiens GN=PRPSAP1 PE=	7	6	5	5	0	0	1	2	1	1	2	2	3	3	0	0	3	3	2	2	0	0	2	2	2	2	0	0	1	2	1	1	2	2	3	3	0	0	2	2	1	1
A0A024R8N9;A8MXZ4;A0A0C4DFY5;Q9NQ84;J9JIE0	A0A024R8N9;A8MXZ4;A0A0C4DFY5;Q9NQ84;J9JIE0	10;10;10;10;7	10;10;10;10;7	3;3;3;3;0	G-protein coupled receptor family C group 5 member C	GPRC5C	>tr|A0A024R8N9|A0A024R8N9_HUMAN G protein-coupled receptor, family C, group 5, member C, isoform CRA_d OS=Homo sapiens GN=GPRC5C PE=4 SV=1;>tr|A8MXZ4|A8MXZ4_HUMAN G-protein-coupled receptor family C group 5 member C (Fragment) OS=Homo sapiens GN=GPRC5C PE=	5	10	10	3	6	6	4	3	8	8	4	3	4	4	3	3	4	5	2	2	5	6	4	4	7	7	6	6	4	3	8	8	4	3	4	4	3	3	4	5	2	2
K7EK18;K7EL40;A0A0S2Z5W9;A0A024R8Q0;A0A0S2Z5A5;A0A024R8V0;Q9UHD8;K7ELJ9;K7ER52;K7EIE4;K7EQD7;K7EIR4;K7EKN4;K7EN52;K7ENQ5;K7EJZ2;K7ER14	K7EK18;K7EL40;A0A0S2Z5W9;A0A024R8Q0;A0A0S2Z5A5;A0A024R8V0;Q9UHD8;K7ELJ9;K7ER52;K7EIE4;K7EQD7	4;4;4;4;4;4;4;2;2;2;2;1;1;1;1;1;1	4;4;4;4;4;4;4;2;2;2;2;1;1;1;1;1;1	4;4;4;4;4;4;4;2;2;2;2;1;1;1;1;1;1	Septin-9	2017-09-09	>tr|K7EK18|K7EK18_HUMAN Septin-9 (Fragment) OS=Homo sapiens GN=SEPT9 PE=1 SV=1;>tr|K7EL40|K7EL40_HUMAN Septin-9 (Fragment) OS=Homo sapiens GN=SEPT9 PE=1 SV=1;>tr|A0A0S2Z5W9|A0A0S2Z5W9_HUMAN Septin 9 isoform 3 (Fragment) OS=Homo sapiens GN=SEPT9 PE=2 SV=1;>	17	4	4	4	0	0	1	1	0	0	0	1	1	1	0	0	0	1	0	0	1	1	1	1	1	1	0	0	1	1	0	0	0	1	1	1	0	0	0	1	0	0
A0A024R8Q1;P10253;I3L3L3;I3L0S5;I3L2V9;E7ET33;B4DPQ4;Q06033	A0A024R8Q1;P10253	36;36;12;10;3;1;1;1	36;36;12;10;3;1;1;1	17;17;3;2;3;0;0;0	Lysosomal alpha-glucosidase;76 kDa lysosomal alpha-glucosidase;70 kDa lysosomal alpha-glucosidase	GAA	>tr|A0A024R8Q1|A0A024R8Q1_HUMAN Glucosidase, alpha acid (Pompe disease, glycogen storage disease type II), isoform CRA_a OS=Homo sapiens GN=GAA PE=3 SV=1;>sp|P10253|LYAG_HUMAN Lysosomal alpha-glucosidase OS=Homo sapiens GN=GAA PE=1 SV=4	8	36	36	17	6	6	19	17	20	20	6	6	15	16	16	16	14	16	10	9	13	15	10	9	16	17	6	6	19	17	20	20	6	6	15	16	16	16	14	16	10	9
B4DG89;A0A024R8R4;Q8TAT6;I3L283;I3L281;I3L3I1	B4DG89;A0A024R8R4;Q8TAT6	3;3;3;1;1;1	3;3;3;1;1;1	3;3;3;1;1;1	Nuclear protein localization protein 4 homolog	NPLOC4	>tr|B4DG89|B4DG89_HUMAN cDNA FLJ57969, highly similar to Nuclear protein localization protein 4 homolog OS=Homo sapiens PE=2 SV=1;>tr|A0A024R8R4|A0A024R8R4_HUMAN Nuclear protein localization 4 homolog (S. cerevisiae), isoform CRA_a OS=Homo sapiens GN=NPLOC	6	3	3	3	0	0	0	0	0	0	0	1	1	1	1	0	1	1	1	1	0	1	0	1	0	0	0	0	0	0	0	0	0	1	1	1	1	0	1	1	1	1
A0A024R8S5;P07237;B4DUA5;H7BZ94;B4DLN6;B4DNL5;H0Y3Z3;I3L398;Q96C96;B3KTQ9;I3L312;I3L4M2;B4DJS0;I3L0S0;I3NI03;I3L3U6;I3L514;I3L3P5;B4DNP9;I3L1Y5	A0A024R8S5;P07237;B4DUA5;H7BZ94;B4DLN6;B4DNL5;H0Y3Z3;I3L398;Q96C96	27;27;26;26;25;25;17;16;15;10;10;8;6;5;5;3;2;2;2;1	27;27;26;26;25;25;17;16;15;10;10;8;6;5;5;3;2;2;2;1	27;27;26;26;25;25;17;16;15;10;10;8;6;5;5;3;2;2;2;1	Protein disulfide-isomerase	P4HB	>tr|A0A024R8S5|A0A024R8S5_HUMAN Protein disulfide-isomerase OS=Homo sapiens GN=P4HB PE=2 SV=1;>sp|P07237|PDIA1_HUMAN Protein disulfide-isomerase OS=Homo sapiens GN=P4HB PE=1 SV=3;>tr|B4DUA5|B4DUA5_HUMAN cDNA FLJ59430, highly similar to Protein disulfide-is	20	27	27	27	14	14	18	18	14	13	8	8	16	15	9	10	14	14	8	9	10	13	15	15	12	12	14	14	18	18	14	13	8	8	16	15	9	10	14	14	8	9
K7ELD9;K7ENG9;A0A024R8T9;O43760;K7ELS8	K7ELD9;K7ENG9;A0A024R8T9;O43760;K7ELS8	2;2;2;2;1	2;2;2;2;1	2;2;2;2;1	Synaptogyrin;Synaptogyrin-2	SYNGR2	>tr|K7ELD9|K7ELD9_HUMAN Synaptogyrin-2 OS=Homo sapiens GN=SYNGR2 PE=1 SV=1;>tr|K7ENG9|K7ENG9_HUMAN Synaptogyrin-2 OS=Homo sapiens GN=SYNGR2 PE=1 SV=1;>tr|A0A024R8T9|A0A024R8T9_HUMAN Synaptogyrin OS=Homo sapiens GN=SYNGR2 PE=3 SV=1;>sp|O43760|SNG2_HUMAN Syn	5	2	2	2	0	0	1	1	1	1	0	0	1	1	0	0	2	1	2	2	1	1	0	0	0	0	0	0	1	1	1	1	0	0	1	1	0	0	2	1	2	2
A0A024R8U8;Q8WVQ1;K7EN15	A0A024R8U8;Q8WVQ1;K7EN15	16;16;8	16;16;8	16;16;8	Soluble calcium-activated nucleotidase 1	CANT1	>tr|A0A024R8U8|A0A024R8U8_HUMAN Calcium activated nucleotidase 1, isoform CRA_b OS=Homo sapiens GN=CANT1 PE=4 SV=1;>sp|Q8WVQ1|CANT1_HUMAN Soluble calcium-activated nucleotidase 1 OS=Homo sapiens GN=CANT1 PE=1 SV=1;>tr|K7EN15|K7EN15_HUMAN Soluble calcium-ac	3	16	16	16	3	4	3	3	7	8	1	2	4	3	1	1	6	6	1	1	10	8	2	2	5	4	3	4	3	3	7	8	1	2	4	3	1	1	6	6	1	1
A0A024R8V7;A0A140VK57;P16035;B4DFW2;K7EIX4;K7EL90	A0A024R8V7;A0A140VK57;P16035;B4DFW2	7;7;7;5;3;1	7;7;7;5;3;1	7;7;7;5;3;1	Metalloproteinase inhibitor 2	TIMP2	>tr|A0A024R8V7|A0A024R8V7_HUMAN TIMP metallopeptidase inhibitor 2, isoform CRA_b OS=Homo sapiens GN=TIMP2 PE=4 SV=1;>tr|A0A140VK57|A0A140VK57_HUMAN Testicular secretory protein Li 57 OS=Homo sapiens PE=2 SV=1;>sp|P16035|TIMP2_HUMAN Metalloproteinase inhibi	6	7	7	7	3	3	4	4	5	5	3	3	3	3	1	1	2	2	1	1	4	3	3	3	4	4	3	3	4	4	5	5	3	3	3	3	1	1	2	2	1	1
K7ENS7;J3QRG1;A0A024R8X4;Q6PK18;K7ELK1	K7ENS7;J3QRG1;A0A024R8X4;Q6PK18;K7ELK1	2;2;2;2;1	2;2;2;2;1	2;2;2;2;1	2-oxoglutarate and iron-dependent oxygenase domain-containing protein 3	OGFOD3;FLJ22222	>tr|K7ENS7|K7ENS7_HUMAN 2-oxoglutarate and iron-dependent oxygenase domain-containing protein 3 (Fragment) OS=Homo sapiens GN=OGFOD3 PE=1 SV=1;>tr|J3QRG1|J3QRG1_HUMAN 2-oxoglutarate and iron-dependent oxygenase domain-containing protein 3 (Fragment) OS=Hom	5	2	2	2	0	0	0	1	0	0	0	0	0	0	0	0	1	1	0	0	0	0	0	0	0	0	0	0	0	1	0	0	0	0	0	0	0	0	1	1	0	0
Q6NVY0;A0A024R904;Q9HB71;B4DFD3	Q6NVY0;A0A024R904;Q9HB71	10;10;10;2	10;10;10;2	10;10;10;2	Calcyclin-binding protein	CACYBP	>tr|Q6NVY0|Q6NVY0_HUMAN Calcyclin binding protein OS=Homo sapiens GN=CACYBP PE=2 SV=1;>tr|A0A024R904|A0A024R904_HUMAN Calcyclin binding protein, isoform CRA_a OS=Homo sapiens GN=CACYBP PE=4 SV=1;>sp|Q9HB71|CYBP_HUMAN Calcyclin-binding protein OS=Homo sapie	4	10	10	10	2	2	3	3	4	5	2	2	4	3	1	1	4	2	2	3	4	4	1	1	0	0	2	2	3	3	4	5	2	2	4	3	1	1	4	2	2	3
A0A0S2Z457;A0A024R936;Q59F14;P19878;A0A0S2Z4F9;A0A024RCK7;Q15776	A0A0S2Z457;A0A024R936;Q59F14;P19878;A0A0S2Z4F9;A0A024RCK7;Q15776	2;2;2;2;1;1;1	2;2;2;2;1;1;1	2;2;2;2;1;1;1	Neutrophil cytosol factor 2;Zinc finger protein with KRAB and SCAN domains 8	NCF2;ZNF192;ZKSCAN8	>tr|A0A0S2Z457|A0A0S2Z457_HUMAN Neutrophil cytosolic factor 2 isoform 1 (Fragment) OS=Homo sapiens GN=NCF2 PE=2 SV=1;>tr|A0A024R936|A0A024R936_HUMAN Neutrophil cytosolic factor 2 (65kDa, chronic granulomatous disease, autosomal 2), isoform CRA_a OS=Homo sa	7	2	2	2	0	0	0	0	0	0	0	0	0	0	2	2	0	0	0	0	0	0	0	0	0	0	0	0	0	0	0	0	0	0	0	0	2	2	0	0	0	0
A0A0K0Q2Z1;A0A024R944;P01008;Q8TCE1;CON__P41361;Q8J001;Q9UBW9;Q8IZZ9;Q8J000;Q9UE54	A0A0K0Q2Z1;A0A024R944;P01008;Q8TCE1;CON__P41361	4;4;4;2;2;1;1;1;1;1	4;4;4;2;2;1;1;1;1;1	4;4;4;2;2;1;1;1;1;1	Antithrombin-III	SERPINC1	>tr|A0A0K0Q2Z1|A0A0K0Q2Z1_HUMAN Serpin peptidase inhibitor clade C member 1 OS=Homo sapiens GN=SERPINC1 PE=2 SV=1;>tr|A0A024R944|A0A024R944_HUMAN Serpin peptidase inhibitor, clade C (Antithrombin), member 1, isoform CRA_a OS=Homo sapiens GN=SERPINC1 PE=3 S	10	4	4	4	2	2	3	3	0	0	0	0	1	1	0	0	1	2	0	0	2	2	0	0	2	2	2	2	3	3	0	0	0	0	1	1	0	0	1	2	0	0
A0A024R952;Q13835;B4DRX5;Q14BN3	A0A024R952;Q13835;B4DRX5;Q14BN3	3;3;2;2	3;3;2;2	3;3;2;2	Plakophilin-1	PKP1	>tr|A0A024R952|A0A024R952_HUMAN Plakophilin 1 (Ectodermal dysplasia/skin fragility syndrome), isoform CRA_a OS=Homo sapiens GN=PKP1 PE=4 SV=1;>sp|Q13835|PKP1_HUMAN Plakophilin-1 OS=Homo sapiens GN=PKP1 PE=1 SV=2;>tr|B4DRX5|B4DRX5_HUMAN cDNA FLJ56941, highl	4	3	3	3	1	0	1	1	0	0	0	0	1	1	0	0	0	0	0	0	0	0	1	1	1	0	1	0	1	1	0	0	0	0	1	1	0	0	0	0	0	0
A0A024R957;Q8NFQ8	A0A024R957;Q8NFQ8	3;3	3;3	3;3	Torsin-1A-interacting protein 2	TOR1AIP2	>tr|A0A024R957|A0A024R957_HUMAN Torsin A interacting protein 2, isoform CRA_b OS=Homo sapiens GN=TOR1AIP2 PE=4 SV=1;>sp|Q8NFQ8|TOIP2_HUMAN Torsin-1A-interacting protein 2 OS=Homo sapiens GN=TOR1AIP2 PE=1 SV=1	2	3	3	3	0	0	2	2	2	2	0	0	0	0	0	0	1	1	0	0	1	2	1	1	2	2	0	0	2	2	2	2	0	0	0	0	0	0	1	1	0	0
A0A024R984;A8K5T0;A0A024R962;P08603;A0A0D9SG88;Q14006	A0A024R984;A8K5T0;A0A024R962;P08603;A0A0D9SG88;Q14006	2;2;2;2;1;1	2;2;2;2;1;1	2;2;2;2;1;1	Complement factor H	hCG_40889;CFH;HF	>tr|A0A024R984|A0A024R984_HUMAN HCG40889, isoform CRA_a OS=Homo sapiens GN=hCG_40889 PE=4 SV=1;>tr|A8K5T0|A8K5T0_HUMAN cDNA FLJ75416, highly similar to Homo sapiens complement factor H (CFH), mRNA OS=Homo sapiens PE=2 SV=1;>tr|A0A024R962|A0A024R962_HUMAN H	6	2	2	2	0	0	0	0	0	0	2	2	0	0	0	0	0	0	0	0	0	0	0	0	0	0	0	0	0	0	0	0	2	2	0	0	0	0	0	0	0	0
A7E2D8;A0A024R968;P23634;A8K8U3;Q68DH9;A0A024RBC7;P20020;Q58F24;A1X4P8;Q59H63;A1L3B5;E7ERY9;Q4J697;H0Y7S3;A0A024R2E4;Q4LE63;A0A024R2K6;Q16720;Q01814	A7E2D8;A0A024R968;P23634;A8K8U3;Q68DH9	7;7;7;6;6;2;2;1;1;1;1;1;1;1;1;1;1;1;1	7;7;7;6;6;2;2;1;1;1;1;1;1;1;1;1;1;1;1	7;7;7;6;6;2;2;1;1;1;1;1;1;1;1;1;1;1;1	Calcium-transporting ATPase;Plasma membrane calcium-transporting ATPase 4	ATP2B4;DKFZp686M088	>tr|A7E2D8|A7E2D8_HUMAN Calcium-transporting ATPase OS=Homo sapiens GN=ATP2B4 PE=2 SV=1;>tr|A0A024R968|A0A024R968_HUMAN Calcium-transporting ATPase OS=Homo sapiens GN=ATP2B4 PE=3 SV=1;>sp|P23634|AT2B4_HUMAN Plasma membrane calcium-transporting ATPase 4 OS=	19	7	7	7	0	0	0	0	2	2	0	0	1	1	1	1	4	4	0	0	0	0	0	0	0	0	0	0	0	0	2	2	0	0	1	1	1	1	4	4	0	0
A0A024R971;Q06828;B3KS64;B4E1J3;Q12833;B3KYB3	A0A024R971;Q06828;B3KS64;B4E1J3	8;8;7;7;3;1	8;8;7;7;3;1	7;7;6;6;2;1	Fibromodulin	FMOD	>tr|A0A024R971|A0A024R971_HUMAN Fibromodulin, isoform CRA_a OS=Homo sapiens GN=FMOD PE=4 SV=1;>sp|Q06828|FMOD_HUMAN Fibromodulin OS=Homo sapiens GN=FMOD PE=1 SV=2;>tr|B3KS64|B3KS64_HUMAN cDNA FLJ35580 fis, clone SPLEN2006389, highly similar to FIBROMODULIN	6	8	8	7	2	2	2	3	5	6	3	3	5	5	0	0	5	5	2	2	7	7	3	2	3	3	2	2	2	3	5	6	3	3	5	5	0	0	5	5	2	2
A0A024R972;P11047;Q6NVY8;R4GNC7;Q8N2D6;REV__B3KPD3;REV__Q9NQS7;Q9Y6N6	A0A024R972;P11047	67;65;4;3;1;1;1;1	67;65;4;3;1;1;1;1	67;65;4;3;1;1;1;1	Laminin subunit gamma-1	LAMC1	>tr|A0A024R972|A0A024R972_HUMAN Laminin, gamma 1 (Formerly LAMB2), isoform CRA_a OS=Homo sapiens GN=LAMC1 PE=4 SV=1;>sp|P11047|LAMC1_HUMAN Laminin subunit gamma-1 OS=Homo sapiens GN=LAMC1 PE=1 SV=3	8	67	67	67	24	27	28	28	47	47	30	29	24	23	21	20	37	36	15	16	20	21	24	25	17	16	24	27	28	28	47	47	30	29	24	23	21	20	37	36	15	16
A0A024R977;Q96BM9;B2R7U5;A0A087X2J2	A0A024R977;Q96BM9;B2R7U5	5;5;4;2	1;1;1;1	1;1;1;1	ADP-ribosylation factor-like protein 8A	ARL8A	>tr|A0A024R977|A0A024R977_HUMAN ADP-ribosylation factor-like 8A, isoform CRA_a OS=Homo sapiens GN=ARL8A PE=3 SV=1;>sp|Q96BM9|ARL8A_HUMAN ADP-ribosylation factor-like protein 8A OS=Homo sapiens GN=ARL8A PE=1 SV=1;>tr|B2R7U5|B2R7U5_HUMAN cDNA, FLJ93607 OS=Ho	4	5	1	1	1	1	2	2	2	2	0	0	2	2	0	0	2	2	1	1	2	2	1	1	4	4	0	0	0	0	1	1	0	0	0	0	0	0	0	0	0	0
A0A024R978;Q9BZQ8;H0Y7M9	A0A024R978;Q9BZQ8	47;47;5	47;47;5	46;46;5	Protein Niban	C1orf24;FAM129A	>tr|A0A024R978|A0A024R978_HUMAN Chromosome 1 open reading frame 24, isoform CRA_a OS=Homo sapiens GN=C1orf24 PE=4 SV=1;>sp|Q9BZQ8|NIBAN_HUMAN Protein Niban OS=Homo sapiens GN=FAM129A PE=1 SV=1	3	47	47	46	12	11	24	25	36	34	30	29	23	23	10	10	23	22	22	21	24	23	20	22	28	28	12	11	24	25	36	34	30	29	23	23	10	10	23	22	22	21
A0A024R983;P10155;B3KN94;H0Y9N5;G5E9R9	A0A024R983;P10155	14;14;6;4;2	14;14;6;4;2	14;14;6;4;2	60 kDa SS-A/Ro ribonucleoprotein	TROVE2	>tr|A0A024R983|A0A024R983_HUMAN TROVE domain family, member 2, isoform CRA_b OS=Homo sapiens GN=TROVE2 PE=4 SV=1;>sp|P10155|RO60_HUMAN 60 kDa SS-A/Ro ribonucleoprotein OS=Homo sapiens GN=TROVE2 PE=1 SV=2	5	14	14	14	2	2	4	5	6	6	3	3	3	4	0	0	7	6	2	2	0	1	2	2	5	4	2	2	4	5	6	6	3	3	3	4	0	0	7	6	2	2
A0A024R994;O75131;Q05DL8;A0A087WYQ3;E5RHZ0;H0YB26;A0A087WXR6;A0A087WUS8;E5RFT7;A0A0G2JMP5;B3KWK1;B2RD40;A8K8A4;E7ENV7;Q96FN4;Q8IYJ1;O95741;Q86YQ8;Q9HCH3;Q9UBL6	A0A024R994;O75131;Q05DL8;A0A087WYQ3	22;22;14;12;8;8;7;6;3;1;1;1;1;1;1;1;1;1;1;1	22;22;14;12;8;8;7;6;3;1;1;1;1;1;1;1;1;1;1;1	21;21;14;12;8;8;7;6;3;1;0;0;0;0;0;0;0;0;0;0	Copine-3	CPNE3	>tr|A0A024R994|A0A024R994_HUMAN Copine III, isoform CRA_a OS=Homo sapiens GN=CPNE3 PE=4 SV=1;>sp|O75131|CPNE3_HUMAN Copine-3 OS=Homo sapiens GN=CPNE3 PE=1 SV=1;>tr|Q05DL8|Q05DL8_HUMAN CPNE3 protein (Fragment) OS=Homo sapiens GN=CPNE3 PE=2 SV=1;>tr|A0A087WY	20	22	22	21	11	11	14	14	14	14	4	3	10	10	6	6	14	13	5	6	11	11	12	12	13	13	11	11	14	14	14	14	4	3	10	10	6	6	14	13	5	6
A0A024R9B8;Q9Y646;E5RJA8;E5RH35;E5RJZ7;E5RJP8;B4DJC2;B4E1W2;H0YBB7	A0A024R9B8;Q9Y646;E5RJA8;E5RH35;E5RJZ7;E5RJP8;B4DJC2	15;15;10;9;9;9;9;2;1	15;15;10;9;9;9;9;2;1	15;15;10;9;9;9;9;2;1	Carboxypeptidase Q	PGCP;CPQ	>tr|A0A024R9B8|A0A024R9B8_HUMAN Plasma glutamate carboxypeptidase, isoform CRA_a OS=Homo sapiens GN=PGCP PE=4 SV=1;>sp|Q9Y646|CBPQ_HUMAN Carboxypeptidase Q OS=Homo sapiens GN=CPQ PE=1 SV=1;>tr|E5RJA8|E5RJA8_HUMAN Carboxypeptidase Q (Fragment) OS=Homo sapie	9	15	15	15	6	6	5	5	10	9	6	6	4	4	0	0	4	4	2	2	3	3	3	3	2	2	6	6	5	5	10	9	6	6	4	4	0	0	4	4	2	2
A0A087WTT1;A0A024R9C1;P11940;E7EQV3;E7ERJ7;B4DQX0;A0A024R9E2;B4DZW4;B3KT93;H0YAR2;Q2VIP3;Q5VX58;Q3ZCS4;Q9H361;H0YBN4;H0YAP2;Q4VXU2;E5RGH3;E5RH24;E5RJB9;H0Y5F5;H0YB86;Q15164;H0YEU6;Q147Y3;Q3B867;Q59GZ7;Q53GL4;E5RHG7;H0YAS6;H0YB75;H0YCC8;H0YC10;E5RGC4;E5RFD8;H0YAS7;L0R533;H0YAW6;A8K8J2;B4DM75;Q96DU9	A0A087WTT1;A0A024R9C1;P11940;E7EQV3;E7ERJ7;B4DQX0;A0A024R9E2;B4DZW4;B3KT93;H0YAR2;Q2VIP3;Q5VX58;Q3ZCS4;Q9H361	23;23;23;22;22;22;21;21;20;15;14;14;14;14;9;8;7;5;5;5;5;4;3;3;3;3;3;3;2;2;2;2;1;1;1;1;1;1;1;1;1	23;23;23;22;22;22;21;21;20;15;14;14;14;14;9;8;7;5;5;5;5;4;3;3;3;3;3;3;2;2;2;2;1;1;1;1;1;1;1;1;1	14;14;14;14;13;13;12;14;11;10;9;9;9;9;4;8;3;2;1;1;0;1;0;0;0;0;0;0;0;2;2;0;1;0;0;1;1;1;1;1;1	Polyadenylate-binding protein 1;Polyadenylate-binding protein 3	PABPC1;PABPC3	>tr|A0A087WTT1|A0A087WTT1_HUMAN Polyadenylate-binding protein OS=Homo sapiens GN=PABPC1 PE=1 SV=1;>tr|A0A024R9C1|A0A024R9C1_HUMAN Polyadenylate-binding protein OS=Homo sapiens GN=PABPC1 PE=3 SV=1;>sp|P11940|PABP1_HUMAN Polyadenylate-binding protein 1 OS=Ho	41	23	23	14	4	5	8	8	12	10	7	7	11	11	2	2	11	10	5	5	7	7	8	8	7	8	4	5	8	8	12	10	7	7	11	11	2	2	11	10	5	5
A0A024R9D3;P62888;E5RI99;A0A0B4J213;A0A0C4DH44	A0A024R9D3;P62888;E5RI99;A0A0B4J213	4;4;3;2;1	4;4;3;2;1	4;4;3;2;1	60S ribosomal protein L30	RPL30	>tr|A0A024R9D3|A0A024R9D3_HUMAN Ribosomal protein L30, isoform CRA_b OS=Homo sapiens GN=RPL30 PE=3 SV=1;>sp|P62888|RL30_HUMAN 60S ribosomal protein L30 OS=Homo sapiens GN=RPL30 PE=1 SV=2;>tr|E5RI99|E5RI99_HUMAN 60S ribosomal protein L30 (Fragment) OS=Homo	5	4	4	4	0	0	2	1	3	3	1	1	3	3	0	0	3	3	1	1	0	0	1	1	0	0	0	0	2	1	3	3	1	1	3	3	0	0	3	3	1	1
A0A024R9D9;Q9NPA8;E5RHX8	A0A024R9D9;Q9NPA8;E5RHX8	2;2;1	2;2;1	2;2;1	Transcription and mRNA export factor ENY2	ENY2	>tr|A0A024R9D9|A0A024R9D9_HUMAN Transcription and mRNA export factor ENY2 OS=Homo sapiens GN=ENY2 PE=3 SV=1;>sp|Q9NPA8|ENY2_HUMAN Transcription and mRNA export factor ENY2 OS=Homo sapiens GN=ENY2 PE=1 SV=1;>tr|E5RHX8|E5RHX8_HUMAN Transcription and mRNA exp	3	2	2	2	0	0	0	0	0	0	0	0	0	0	0	0	1	0	1	1	0	0	0	0	0	0	0	0	0	0	0	0	0	0	0	0	0	0	1	0	1	1
A0A024R9G4;Q9NUQ9;Q68D08;E5RI16;E5RJE1;E5RIR8;E5RJL8;E5RGI7;E5RFS4;E5RHU5;A0A087X178;Q3ZTR9;E5RK61	A0A024R9G4;Q9NUQ9;Q68D08;E5RI16;E5RJE1;E5RIR8;E5RJL8	7;7;6;5;4;4;4;3;2;2;2;2;1	7;7;6;5;4;4;4;3;2;2;2;2;1	6;6;6;5;4;4;4;3;2;2;1;1;1	Protein FAM49B	FAM49B;DKFZp686B04128	>tr|A0A024R9G4|A0A024R9G4_HUMAN Family with sequence similarity 49, member B, isoform CRA_a OS=Homo sapiens GN=FAM49B PE=4 SV=1;>sp|Q9NUQ9|FA49B_HUMAN Protein FAM49B OS=Homo sapiens GN=FAM49B PE=1 SV=1;>tr|Q68D08|Q68D08_HUMAN Putative uncharacterized prote	13	7	7	6	0	0	1	1	3	4	1	1	0	0	0	0	2	2	0	0	0	0	1	1	2	1	0	0	1	1	3	4	1	1	0	0	0	0	2	2	0	0
H0YBX3;A0A024R9H2;H0YB34;P52758	H0YBX3;A0A024R9H2;H0YB34;P52758	2;2;2;2	2;2;2;2	2;2;2;2	Ribonuclease UK114	HRSP12	>tr|H0YBX3|H0YBX3_HUMAN Protein RIDA (Fragment) OS=Homo sapiens GN=RIDA PE=1 SV=1;>tr|A0A024R9H2|A0A024R9H2_HUMAN Heat-responsive protein 12, isoform CRA_a OS=Homo sapiens GN=HRSP12 PE=4 SV=1;>tr|H0YB34|H0YB34_HUMAN Protein RIDA (Fragment) OS=Homo sapiens	4	2	2	2	0	0	1	1	0	0	0	0	0	0	0	0	2	2	0	0	1	1	1	1	0	0	0	0	1	1	0	0	0	0	0	0	0	0	2	2	0	0
A0A024R9I0;P21283;E7EV59;B7Z593	A0A024R9I0;P21283;E7EV59;B7Z593	17;17;11;11	17;17;11;11	17;17;11;11	V-type proton ATPase subunit C 1	ATP6V1C1	>tr|A0A024R9I0|A0A024R9I0_HUMAN ATPase, H+ transporting, lysosomal 42kDa, V1 subunit C1, isoform CRA_a OS=Homo sapiens GN=ATP6V1C1 PE=2 SV=1;>sp|P21283|VATC1_HUMAN V-type proton ATPase subunit C 1 OS=Homo sapiens GN=ATP6V1C1 PE=1 SV=4;>tr|E7EV59|E7EV59_HUM	4	17	17	17	4	3	3	2	3	3	3	3	3	3	0	0	4	5	2	3	2	2	5	5	3	2	4	3	3	2	3	3	3	3	3	3	0	0	4	5	2	3
A0A024R9J4;P48745;B3FHX2	A0A024R9J4;P48745	14;14;3	14;14;3	3;3;3	Protein NOV homolog	NOV	>tr|A0A024R9J4|A0A024R9J4_HUMAN Nephroblastoma overexpressed gene, isoform CRA_a OS=Homo sapiens GN=NOV PE=4 SV=1;>sp|P48745|NOV_HUMAN Protein NOV homolog OS=Homo sapiens GN=NOV PE=1 SV=1	3	14	14	3	1	1	1	1	9	10	9	9	2	2	0	0	5	5	0	0	6	6	5	5	5	5	1	1	1	1	9	10	9	9	2	2	0	0	5	5	0	0
A0A024R9L6;Q11201;E5RHV6;E5RGL4	A0A024R9L6;Q11201	5;5;2;1	5;5;2;1	5;5;2;1	CMP-N-acetylneuraminate-beta-galactosamide-alpha-2,3-sialyltransferase 1	ST3GAL1	>tr|A0A024R9L6|A0A024R9L6_HUMAN ST3 beta-galactoside alpha-2,3-sialyltransferase 1, isoform CRA_a OS=Homo sapiens GN=ST3GAL1 PE=3 SV=1;>sp|Q11201|SIA4A_HUMAN CMP-N-acetylneuraminate-beta-galactosamide-alpha-2,3-sialyltransferase 1 OS=Homo sapiens GN=ST3GAL	4	5	5	5	0	1	1	1	2	3	0	0	1	1	2	2	0	0	0	0	1	1	0	0	1	1	0	1	1	1	2	3	0	0	1	1	2	2	0	0	0	0
A0A024R9M3;Q8N9N7;H3BSW0	A0A024R9M3;Q8N9N7;H3BSW0	10;10;9	10;10;9	10;10;9	Leucine-rich repeat-containing protein 57	LRRC57	>tr|A0A024R9M3|A0A024R9M3_HUMAN Leucine rich repeat containing 57, isoform CRA_c OS=Homo sapiens GN=LRRC57 PE=4 SV=1;>sp|Q8N9N7|LRC57_HUMAN Leucine-rich repeat-containing protein 57 OS=Homo sapiens GN=LRRC57 PE=1 SV=1;>tr|H3BSW0|H3BSW0_HUMAN Leucine-rich r	3	10	10	10	3	3	5	5	4	6	4	4	3	3	3	3	6	6	6	5	3	3	7	5	6	6	3	3	5	5	4	6	4	4	3	3	3	3	6	6	6	5
A0A024R9M9;Q99653;H0YKE7;F5GX29;B4DSB5;H0YNG9;H0YLY7	A0A024R9M9;Q99653;H0YKE7;F5GX29;B4DSB5;H0YNG9	3;3;2;2;2;2;1	3;3;2;2;2;2;1	3;3;2;2;2;2;1	Calcineurin B homologous protein 1	CHP;CHP1	>tr|A0A024R9M9|A0A024R9M9_HUMAN Calcium binding protein P22, isoform CRA_a OS=Homo sapiens GN=CHP PE=4 SV=1;>sp|Q99653|CHP1_HUMAN Calcineurin B homologous protein 1 OS=Homo sapiens GN=CHP1 PE=1 SV=3;>tr|H0YKE7|H0YKE7_HUMAN Calcineurin B homologous protein	7	3	3	3	0	0	2	2	1	1	0	0	1	1	0	0	2	2	1	0	0	0	2	2	2	1	0	0	2	2	1	1	0	0	1	1	0	0	2	2	1	0
A8K9B9;A0A024R9N6;Q9H223;B3KUH4	A8K9B9;A0A024R9N6;Q9H223	26;26;26;1	24;24;24;1	22;22;22;0	EH domain-containing protein 4	EHD4	>tr|A8K9B9|A8K9B9_HUMAN cDNA FLJ77391, highly similar to Homo sapiens EH-domain containing 4 (EHD4), mRNA OS=Homo sapiens PE=2 SV=1;>tr|A0A024R9N6|A0A024R9N6_HUMAN EH-domain containing 4, isoform CRA_a OS=Homo sapiens GN=EHD4 PE=3 SV=1;>sp|Q9H223|EHD4_HUMA	4	26	24	22	8	9	9	10	16	16	5	4	14	15	5	4	16	16	8	9	6	6	12	10	12	13	6	7	7	8	14	14	5	4	12	13	5	4	14	14	7	8
A0A024R9Q0;H7BXQ9;Q5T890	A0A024R9Q0;H7BXQ9;Q5T890	2;2;2	2;2;2	2;2;2	DNA excision repair protein ERCC-6-like 2	C9orf102;ERCC6L2	>tr|A0A024R9Q0|A0A024R9Q0_HUMAN Chromosome 9 open reading frame 102, isoform CRA_a OS=Homo sapiens GN=C9orf102 PE=4 SV=1;>tr|H7BXQ9|H7BXQ9_HUMAN DNA excision repair protein ERCC-6-like 2 (Fragment) OS=Homo sapiens GN=ERCC6L2 PE=1 SV=1;>sp|Q5T890|ER6L2_HUMA	3	2	2	2	0	0	0	0	0	0	1	1	1	1	0	0	0	0	1	1	0	0	0	0	0	0	0	0	0	0	0	0	1	1	1	1	0	0	0	0	1	1
A0A024R9Q1;P07996;CON__Q28194;A0PJG0;Q7KYY3	A0A024R9Q1;P07996;CON__Q28194	14;13;9;4;1	12;11;8;4;1	12;11;8;4;1	Thrombospondin-1	THBS1	>tr|A0A024R9Q1|A0A024R9Q1_HUMAN Thrombospondin 1, isoform CRA_a OS=Homo sapiens GN=THBS1 PE=4 SV=1;>sp|P07996|TSP1_HUMAN Thrombospondin-1 OS=Homo sapiens GN=THBS1 PE=1 SV=2;>Q28194 TREMBL:Q28194 (Bos taurus) Thrombospondin-1	5	14	12	12	2	2	2	2	6	5	6	5	3	2	4	3	2	2	2	2	3	3	1	1	4	4	1	1	1	1	5	4	6	5	2	2	3	2	1	1	1	1
A0A024R9R3;Q9P253	A0A024R9R3;Q9P253	5;5	5;5	5;5	Vacuolar protein sorting-associated protein 18 homolog	VPS18	>tr|A0A024R9R3|A0A024R9R3_HUMAN Vacuolar protein sorting protein 18, isoform CRA_d OS=Homo sapiens GN=VPS18 PE=4 SV=1;>sp|Q9P253|VPS18_HUMAN Vacuolar protein sorting-associated protein 18 homolog OS=Homo sapiens GN=VPS18 PE=1 SV=2	2	5	5	5	0	0	0	0	3	3	0	0	0	0	0	0	1	1	0	0	0	0	0	0	0	0	0	0	0	0	3	3	0	0	0	0	0	0	1	1	0	0
A0A024R9T6;Q9P270;D6RIF6;Q9H705;H0Y9L2;D6REM5	A0A024R9T6;Q9P270;D6RIF6	14;14;8;4;3;1	14;14;8;4;3;1	14;14;8;4;3;1	SLAIN motif-containing protein 2	hCG_17415;SLAIN2	>tr|A0A024R9T6|A0A024R9T6_HUMAN HCG17415, isoform CRA_a OS=Homo sapiens GN=SLAIN2 PE=2 SV=1;>sp|Q9P270|SLAI2_HUMAN SLAIN motif-containing protein 2 OS=Homo sapiens GN=SLAIN2 PE=1 SV=2;>tr|D6RIF6|D6RIF6_HUMAN SLAIN motif-containing protein 2 OS=Homo sapiens	6	14	14	14	0	0	6	6	4	4	0	0	4	4	0	0	9	10	5	5	4	5	5	6	9	9	0	0	6	6	4	4	0	0	4	4	0	0	9	10	5	5
A0A024R9Y3;A0A024R9U8;A0A024R9W5;Q7Z6Z7;Q5H962;Q5H924;Q5H935;H0Y659;B4DGF6;Q8IWJ0;A0A1B0GXC7;Q5H963;A0A087X146;Q5H964;A0A087X1S3;Q3B7K0;Q53FW4	A0A024R9Y3;A0A024R9U8;A0A024R9W5;Q7Z6Z7;Q5H962;Q5H924	22;22;22;22;12;12;6;6;6;3;2;2;2;1;1;1;1	22;22;22;22;12;12;6;6;6;3;2;2;2;1;1;1;1	18;18;18;18;8;12;6;6;6;2;2;2;2;1;1;1;1	E3 ubiquitin-protein ligase HUWE1	HUWE1	>tr|A0A024R9Y3|A0A024R9Y3_HUMAN HECT, UBA and WWE domain containing 1, isoform CRA_a OS=Homo sapiens GN=HUWE1 PE=4 SV=1;>tr|A0A024R9U8|A0A024R9U8_HUMAN HECT, UBA and WWE domain containing 1, isoform CRA_c OS=Homo sapiens GN=HUWE1 PE=4 SV=1;>tr|A0A024R9W5|A	17	22	22	18	1	1	2	3	11	11	3	3	5	5	0	0	6	8	6	6	3	3	4	3	2	2	1	1	2	3	11	11	3	3	5	5	0	0	6	8	6	6
A0A024R9V7;Q8IWE2;B4DL61;B4E1Z8;B3KSS5	A0A024R9V7;Q8IWE2;B4DL61;B4E1Z8	12;12;10;10;5	12;12;10;10;5	12;12;10;10;5	Protein NOXP20	LOC92689;FAM114A1	>tr|A0A024R9V7|A0A024R9V7_HUMAN Uncharacterized protein OS=Homo sapiens GN=LOC92689 PE=4 SV=1;>sp|Q8IWE2|NXP20_HUMAN Protein NOXP20 OS=Homo sapiens GN=FAM114A1 PE=1 SV=2;>tr|B4DL61|B4DL61_HUMAN cDNA FLJ60291 OS=Homo sapiens PE=2 SV=1;>tr|B4E1Z8|B4E1Z8_HUMA	5	12	12	12	1	1	3	3	2	3	4	4	5	4	0	0	5	6	2	2	0	0	1	1	5	6	1	1	3	3	2	3	4	4	5	4	0	0	5	6	2	2
A0A024R9X5;Q8TDQ7	A0A024R9X5;Q8TDQ7	6;6	2;2	2;2	Glucosamine-6-phosphate isomerase 2	GNPDA2	>tr|A0A024R9X5|A0A024R9X5_HUMAN Glucosamine-6-phosphate isomerase OS=Homo sapiens GN=GNPDA2 PE=3 SV=1;>sp|Q8TDQ7|GNPI2_HUMAN Glucosamine-6-phosphate isomerase 2 OS=Homo sapiens GN=GNPDA2 PE=1 SV=1	2	6	2	2	1	1	3	3	5	5	2	3	3	3	2	2	4	4	3	2	0	2	2	2	3	2	0	0	2	2	1	1	0	1	0	0	1	1	1	1	1	0
A0A0G2JQJ7;A0A0G2JPD5;A0A024R9Y1;A0A0G2JS76;A0A0G2JMX7;P10636;B4DSE3;B4DSB3;B3KTM0;I3L170;B7U472;A0A024RA19;A0A024R9Y0;A0A024RA17	A0A0G2JQJ7;A0A0G2JPD5;A0A024R9Y1;A0A0G2JS76;A0A0G2JMX7;P10636;B4DSE3;B4DSB3;B3KTM0;I3L170;B7U472;A0A024RA19;A0A024R9Y0;A0A024RA17	2;2;2;2;2;2;1;1;1;1;1;1;1;1	1;1;1;1;1;1;0;0;0;0;1;0;0;0	1;1;1;1;1;1;0;0;0;0;1;0;0;0	Microtubule-associated protein;Microtubule-associated protein tau	MAPT	>tr|A0A0G2JQJ7|A0A0G2JQJ7_HUMAN Microtubule-associated protein OS=Homo sapiens GN=MAPT PE=1 SV=1;>tr|A0A0G2JPD5|A0A0G2JPD5_HUMAN Microtubule-associated protein OS=Homo sapiens GN=MAPT PE=1 SV=1;>tr|A0A024R9Y1|A0A024R9Y1_HUMAN Microtubule-associated protein	14	2	1	1	1	1	2	2	1	1	1	1	1	1	0	0	2	2	0	0	1	1	2	2	2	2	1	1	1	1	1	1	1	1	1	1	0	0	1	1	0	0
B4DX55;A0A024R9Y7;Q9UNF1;Q5H907;Q5H909;B4DNG7;B4DWM5	B4DX55;A0A024R9Y7;Q9UNF1;Q5H907;Q5H909	4;4;4;3;3;1;1	4;4;4;3;3;1;1	4;4;4;3;3;1;1	Melanoma-associated antigen D2	MAGED2	>tr|B4DX55|B4DX55_HUMAN cDNA FLJ58171, moderately similar to Melanoma-associated antigen D2 OS=Homo sapiens PE=2 SV=1;>tr|A0A024R9Y7|A0A024R9Y7_HUMAN Melanoma antigen family D, 2, isoform CRA_a OS=Homo sapiens GN=MAGED2 PE=4 SV=1;>sp|Q9UNF1|MAGD2_HUMAN Mel	7	4	4	4	0	0	2	2	1	1	0	0	0	0	0	0	2	2	0	0	0	0	1	0	2	1	0	0	2	2	1	1	0	0	0	0	0	0	2	2	0	0
E9PDL4;A0A024RA29;Q05084;C9J3Y4;B9ZVM7;Q6LCR0;E7ENI6;C9J8Y3;F8WET5;Q6LCT9;Q9UHM5;C9IZC7	E9PDL4;A0A024RA29;Q05084;C9J3Y4;B9ZVM7;Q6LCR0;E7ENI6;C9J8Y3	6;6;6;4;4;4;4;3;2;2;1;1	6;6;6;4;4;4;4;3;2;2;1;1	6;6;6;4;4;4;4;3;2;2;1;1	Islet cell autoantigen 1	ICA1	>tr|E9PDL4|E9PDL4_HUMAN Islet cell autoantigen 1 OS=Homo sapiens GN=ICA1 PE=1 SV=1;>tr|A0A024RA29|A0A024RA29_HUMAN Islet cell autoantigen 1, 69kDa, isoform CRA_a OS=Homo sapiens GN=ICA1 PE=2 SV=1;>sp|Q05084|ICA69_HUMAN Islet cell autoantigen 1 OS=Homo sapi	12	6	6	6	2	2	3	3	3	2	2	1	3	3	0	0	3	3	0	0	3	2	1	1	3	3	2	2	3	3	3	2	2	1	3	3	0	0	3	3	0	0
B5MCE7;B5MCH7;B7Z4K8;E7ETZ4;B3KM68;A0A024RA42;Q9Y6E2;E9PFD4;Q75MG1	B5MCE7;B5MCH7;B7Z4K8;E7ETZ4;B3KM68;A0A024RA42;Q9Y6E2;E9PFD4	4;4;4;4;4;4;4;2;1	3;3;3;3;3;3;3;1;1	3;3;3;3;3;3;3;1;1	Basic leucine zipper and W2 domain-containing protein 2	BZW2	>tr|B5MCE7|B5MCE7_HUMAN Basic leucine zipper and W2 domain-containing protein 2 OS=Homo sapiens GN=BZW2 PE=1 SV=1;>tr|B5MCH7|B5MCH7_HUMAN Basic leucine zipper and W2 domain-containing protein 2 OS=Homo sapiens GN=BZW2 PE=1 SV=1;>tr|B7Z4K8|B7Z4K8_HUMAN cDNA	9	4	3	3	2	2	1	1	2	2	2	2	1	1	0	1	3	3	0	0	2	1	2	2	3	3	1	1	0	0	1	1	2	2	0	0	0	1	2	2	0	0
Q53GF5;A0A024RA52;P25787;C9JCK5;H3BT36;H7C402;Q6MZI6	Q53GF5;A0A024RA52;P25787	8;8;8;3;2;1;1	8;8;8;3;2;1;1	8;8;8;3;2;1;1	Proteasome subunit alpha type;Proteasome subunit alpha type-2	PSMA2	>tr|Q53GF5|Q53GF5_HUMAN Proteasome subunit alpha type (Fragment) OS=Homo sapiens PE=2 SV=1;>tr|A0A024RA52|A0A024RA52_HUMAN Proteasome subunit alpha type OS=Homo sapiens GN=PSMA2 PE=1 SV=1;>sp|P25787|PSA2_HUMAN Proteasome subunit alpha type-2 OS=Homo sapien	7	8	8	8	2	1	5	5	7	7	3	2	6	7	2	3	6	6	3	3	6	6	4	4	7	7	2	1	5	5	7	7	3	2	6	7	2	3	6	6	3	3
A0A075B6H3;A0A024RAD2;A0A024RA95;Q5TGY1;A0A024RAA3;Q6ZSC6	A0A075B6H3;A0A024RAD2;A0A024RA95;Q5TGY1;A0A024RAA3	6;6;6;6;4;1	6;6;6;6;4;1	6;6;6;6;4;1	Transmembrane and coiled-coil domain-containing protein 4	TMCO4	>tr|A0A075B6H3|A0A075B6H3_HUMAN Transmembrane and coiled-coil domain-containing protein 4 OS=Homo sapiens GN=TMCO4 PE=1 SV=1;>tr|A0A024RAD2|A0A024RAD2_HUMAN Transmembrane and coiled-coil domains 4, isoform CRA_b OS=Homo sapiens GN=TMCO4 PE=4 SV=1;>tr|A0A02	6	6	6	6	0	0	1	1	2	2	1	1	0	0	0	0	2	1	0	0	0	0	2	1	3	2	0	0	1	1	2	2	1	1	0	0	0	0	2	1	0	0
A0A024RA96;P14555;Q6DN23;Q96RW9;Q9C011;Q96RW8;Q8NI47	A0A024RA96;P14555;Q6DN23;Q96RW9	8;8;6;4;2;2;2	8;8;6;4;2;2;2	8;8;6;4;2;2;2	Phospholipase A2, membrane associated	PLA2G2A;PLA2	>tr|A0A024RA96|A0A024RA96_HUMAN Phospholipase A(2) OS=Homo sapiens GN=PLA2G2A PE=3 SV=1;>sp|P14555|PA2GA_HUMAN Phospholipase A2, membrane associated OS=Homo sapiens GN=PLA2G2A PE=1 SV=2;>tr|Q6DN23|Q6DN23_HUMAN Phospholipase A(2) OS=Homo sapiens PE=2 SV=1;>	7	8	8	8	5	5	7	7	5	5	3	3	5	5	3	3	4	5	3	1	7	7	5	5	5	5	5	5	7	7	5	5	3	3	5	5	3	3	4	5	3	1
A0A024RA98;Q9Y2J8;B4DIU3	A0A024RA98;Q9Y2J8;B4DIU3	4;4;3	4;4;3	4;4;3	Protein-arginine deiminase type-2	PADI2	>tr|A0A024RA98|A0A024RA98_HUMAN Peptidyl arginine deiminase, type II, isoform CRA_a OS=Homo sapiens GN=PADI2 PE=4 SV=1;>sp|Q9Y2J8|PADI2_HUMAN Protein-arginine deiminase type-2 OS=Homo sapiens GN=PADI2 PE=1 SV=2;>tr|B4DIU3|B4DIU3_HUMAN cDNA FLJ61278, highly	3	4	4	4	0	0	0	0	0	0	0	0	0	0	4	4	0	0	0	0	0	0	0	0	0	0	0	0	0	0	0	0	0	0	0	0	4	4	0	0	0	0
A0A024RAB6;P98160;Q59EG0;A0A0U1RQT3;Q2VPA1	A0A024RAB6;P98160	30;29;3;2;2	30;29;3;2;2	30;29;3;2;2	Basement membrane-specific heparan sulfate proteoglycan core protein;Endorepellin;LG3 peptide	HSPG2	>tr|A0A024RAB6|A0A024RAB6_HUMAN Heparan sulfate proteoglycan 2 (Perlecan), isoform CRA_b OS=Homo sapiens GN=HSPG2 PE=4 SV=1;>sp|P98160|PGBM_HUMAN Basement membrane-specific heparan sulfate proteoglycan core protein OS=Homo sapiens GN=HSPG2 PE=1 SV=4	5	30	30	30	0	0	6	7	18	19	7	6	1	0	0	0	10	10	2	1	0	0	3	4	0	0	0	0	6	7	18	19	7	6	1	0	0	0	10	10	2	1
U3KQ84;A0A0C4DGS1;A0A024RAD5;P39656	U3KQ84;A0A0C4DGS1;A0A024RAD5;P39656	3;3;3;3	3;3;3;3	3;3;3;3	Dolichyl-diphosphooligosaccharide--protein glycosyltransferase 48 kDa subunit	DDOST	>tr|U3KQ84|U3KQ84_HUMAN Dolichyl-diphosphooligosaccharide--protein glycosyltransferase 48 kDa subunit (Fragment) OS=Homo sapiens GN=DDOST PE=1 SV=8;>tr|A0A0C4DGS1|A0A0C4DGS1_HUMAN Dolichyl-diphosphooligosaccharide--protein glycosyltransferase 48 kDa subuni	4	3	3	3	1	1	2	2	2	2	0	0	0	0	0	0	2	2	0	0	0	0	0	0	0	0	1	1	2	2	2	2	0	0	0	0	0	0	2	2	0	0
A0A024RAE4;B4E1U9;P60953;A0A024R9T1;B7ZAY4;B4DMH5;A0A024RAE6;Q5JYX0;Q9UJM1;Q9UJM0;B1AH79;Q59FQ0;G3V4H1;G3V476;Q7Z513;A0A024R692;Q59G91;Q9H4E5	A0A024RAE4;B4E1U9;P60953;A0A024R9T1;B7ZAY4;B4DMH5;A0A024RAE6;Q5JYX0;Q9UJM1	12;12;12;10;10;10;9;7;7;4;1;1;1;1;1;1;1;1	12;12;12;10;10;10;9;7;7;4;1;1;1;1;1;1;1;1	11;11;11;10;10;10;8;6;6;3;0;0;0;0;0;0;0;0	Cell division control protein 42 homolog	CDC42;hCG_39634	>tr|A0A024RAE4|A0A024RAE4_HUMAN Cell division cycle 42 (GTP binding protein, 25kDa), isoform CRA_a OS=Homo sapiens GN=CDC42 PE=4 SV=1;>tr|B4E1U9|B4E1U9_HUMAN cDNA FLJ54776, highly similar to Cell division control protein 42 homolog OS=Homo sapiens PE=2 SV=	18	12	12	11	10	9	9	9	10	9	4	4	6	6	5	5	9	9	10	10	8	8	10	10	8	7	10	9	9	9	10	9	4	4	6	6	5	5	9	9	10	10
B7Z6Y2;A0A024RAI6;A0A024RAG9;Q9BTH3;A0A024RAG8;A0A024RAE9;B7Z2Z2;A0A024RAI4;A0A024RAI5;Q8WWH9;A0A024RAJ2;A0A024RAJ3;A0A024RAF0;A0A024RAF6;A0A024RAF1;O00499;Q8NFL3;S4R418;F5H0W4;B7Z6F3;A0A0A0MT10;B2RAR0;A0A087X188;A8K5Y2;Q9UBW5;P49418	B7Z6Y2;A0A024RAI6;A0A024RAG9;Q9BTH3;A0A024RAG8;A0A024RAE9;B7Z2Z2;A0A024RAI4;A0A024RAI5;Q8WWH9;A0A024RAJ2;A0A024RAJ3;A0A024RAF0;A0A024RAF6;A0A024RAF1;O00499;Q8NFL3;S4R418;F5H0W4;B7Z6F3;A0A0A0MT10;B2RAR0;A0A087X188;A8K5Y2;Q9UBW5;P49418	2;2;2;2;2;2;2;2;2;2;2;2;2;2;2;2;1;1;1;1;1;1;1;1;1;1	2;2;2;2;2;2;2;2;2;2;2;2;2;2;2;2;1;1;1;1;1;1;1;1;1;1	2;2;2;2;2;2;2;2;2;2;2;2;2;2;2;2;1;1;1;1;1;1;1;1;1;1	Myc box-dependent-interacting protein 1;Bridging integrator 2;Amphiphysin	BIN1;AMPH;BIN2	>tr|B7Z6Y2|B7Z6Y2_HUMAN cDNA FLJ54942, highly similar to Homo sapiens bridging integrator 1 (BIN1), transcript variant 10, mRNA OS=Homo sapiens PE=2 SV=1;>tr|A0A024RAI6|A0A024RAI6_HUMAN Bridging integrator 1, isoform CRA_g OS=Homo sapiens GN=BIN1 PE=4 SV=1	26	2	2	2	0	0	1	1	0	0	0	0	0	0	0	0	0	0	1	1	0	0	1	0	0	0	0	0	1	1	0	0	0	0	0	0	0	0	0	0	1	1
A0A024RAF9;O60243;B4E2L3;Q9Y3P2;B7Z2S1;B7Z2U5;Q8IZP7;Q96MM7;A0A087X0G1;B3KX95;B7Z5H6	A0A024RAF9;O60243	13;13;4;2;2;2;2;2;1;1;1	13;13;4;2;2;2;2;2;1;1;1	13;13;4;2;2;2;2;2;1;1;1	Heparan-sulfate 6-O-sulfotransferase 1	HS6ST1	>tr|A0A024RAF9|A0A024RAF9_HUMAN Heparan sulfate 6-O-sulfotransferase 1, isoform CRA_a OS=Homo sapiens GN=HS6ST1 PE=4 SV=1;>sp|O60243|H6ST1_HUMAN Heparan-sulfate 6-O-sulfotransferase 1 OS=Homo sapiens GN=HS6ST1 PE=1 SV=5	11	13	13	13	3	3	9	9	9	9	1	1	2	2	1	1	4	4	2	2	7	7	5	6	5	5	3	3	9	9	9	9	1	1	2	2	1	1	4	4	2	2
B2R6Q2;A0A024RAG0;P05186;B7Z1D1;Q9UIL5;B1ANL0;G8I0M6	B2R6Q2;A0A024RAG0;P05186;B7Z1D1;Q9UIL5	10;10;10;6;5;2;1	10;10;10;6;5;2;1	10;10;10;6;5;2;1	Alkaline phosphatase;Alkaline phosphatase, tissue-nonspecific isozyme	ALPL	>tr|B2R6Q2|B2R6Q2_HUMAN Alkaline phosphatase OS=Homo sapiens PE=2 SV=1;>tr|A0A024RAG0|A0A024RAG0_HUMAN Alkaline phosphatase OS=Homo sapiens GN=ALPL PE=3 SV=1;>sp|P05186|PPBT_HUMAN Alkaline phosphatase, tissue-nonspecific isozyme OS=Homo sapiens GN=ALPL PE=	7	10	10	10	0	0	0	0	10	10	0	0	0	0	2	2	0	0	0	0	0	0	0	0	0	0	0	0	0	0	10	10	0	0	0	0	2	2	0	0	0	0
A0A024RAG3;P11234;C9J6B1;C9JQB3;B4E364;C9JYR1;F8WEQ6	A0A024RAG3;P11234;C9J6B1;C9JQB3;B4E364	10;10;9;8;7;3;2	10;10;9;8;7;3;2	7;7;7;6;6;1;1	Ras-related protein Ral-B	RALB	>tr|A0A024RAG3|A0A024RAG3_HUMAN V-ral simian leukemia viral oncogene homolog B (Ras related GTP binding protein), isoform CRA_a OS=Homo sapiens GN=RALB PE=4 SV=1;>sp|P11234|RALB_HUMAN Ras-related protein Ral-B OS=Homo sapiens GN=RALB PE=1 SV=1;>tr|C9J6B1|C	7	10	10	7	4	4	6	6	8	8	1	1	7	7	1	1	6	6	2	2	5	5	7	6	5	5	4	4	6	6	8	8	1	1	7	7	1	1	6	6	2	2
A0A024RAI1;P61158;B4DXW1;Q59FV6;B4DT29;B4DTI0;B4E1U3;F8WDR7;Q59GD5;B7Z9W3;Q9P1U1;F8WEW2;F8WE84;B3KM55;A0A0A0MTI9;H7C4J1;C9IZN3;Q9C0K3	A0A024RAI1;P61158;B4DXW1;Q59FV6;B4DT29;B4DTI0	16;16;14;13;12;11;5;3;2;2;2;1;1;1;1;1;1;1	16;16;14;13;12;11;5;3;2;2;2;1;1;1;1;1;1;1	16;16;14;13;12;11;5;3;2;2;2;1;1;1;1;1;1;1	Actin-related protein 3	ACTR3	>tr|A0A024RAI1|A0A024RAI1_HUMAN ARP3 actin-related protein 3 homolog (Yeast), isoform CRA_a OS=Homo sapiens GN=ACTR3 PE=3 SV=1;>sp|P61158|ARP3_HUMAN Actin-related protein 3 OS=Homo sapiens GN=ACTR3 PE=1 SV=3;>tr|B4DXW1|B4DXW1_HUMAN Actin-related protein 3	18	16	16	16	3	6	8	7	9	11	8	8	4	4	5	6	10	10	5	5	3	3	6	7	5	6	3	6	8	7	9	11	8	8	4	4	5	6	10	10	5	5
A0A024RAJ5;Q9Y5P4;A0A0A0MRE4	A0A024RAJ5;Q9Y5P4	8;8;1	8;8;1	8;8;1	Collagen type IV alpha-3-binding protein	COL4A3BP	>tr|A0A024RAJ5|A0A024RAJ5_HUMAN Collagen, type IV, alpha 3 (Goodpasture antigen) binding protein, isoform CRA_a OS=Homo sapiens GN=COL4A3BP PE=4 SV=1;>sp|Q9Y5P4|C43BP_HUMAN Collagen type IV alpha-3-binding protein OS=Homo sapiens GN=COL4A3BP PE=1 SV=1	3	8	8	8	1	1	1	2	1	2	2	1	1	2	0	0	3	4	2	2	1	3	1	1	1	2	1	1	1	2	1	2	2	1	1	2	0	0	3	4	2	2
A0A024RAJ6;P07686;Q5URX0;H0YA83;H0Y9B6;H0Y9M3;D6REQ8;REV__E5RI09;REV__E5RG95;REV__A4UCS8;REV__K7EM90;REV__K7EPM1;REV__K7EKN2;REV__E5RGZ4;REV__E2DRY6;REV__D3DTL4;REV__P13929;REV__P06733;REV__A0A024R4F1	A0A024RAJ6;P07686;Q5URX0	29;29;21;12;11;3;1;1;1;1;1;1;1;1;1;1;1;1;1	29;29;21;12;11;3;1;1;1;1;1;1;1;1;1;1;1;1;1	29;29;21;12;11;3;1;1;1;1;1;1;1;1;1;1;1;1;1	Beta-hexosaminidase;Beta-hexosaminidase subunit beta;Beta-hexosaminidase subunit beta chain B;Beta-hexosaminidase subunit beta chain A	HEXB	>tr|A0A024RAJ6|A0A024RAJ6_HUMAN Beta-hexosaminidase OS=Homo sapiens GN=HEXB PE=3 SV=1;>sp|P07686|HEXB_HUMAN Beta-hexosaminidase subunit beta OS=Homo sapiens GN=HEXB PE=1 SV=3;>tr|Q5URX0|Q5URX0_HUMAN Beta-hexosaminidase subunit beta OS=Homo sapiens GN=HEL-2	19	29	29	29	12	12	15	15	25	26	15	15	21	20	17	18	17	17	11	11	17	17	16	16	16	15	12	12	15	15	25	26	15	15	21	20	17	18	17	17	11	11
F5H7S7;A0A024RAJ8;Q13576;E7EWC2;B7Z7U6;Q59HA3;B7Z881;D6R939;E9PDT6;B7Z7X2;D6RDK8;D6RGC6;D6R999	F5H7S7;A0A024RAJ8;Q13576;E7EWC2;B7Z7U6;Q59HA3;B7Z881;D6R939	29;29;29;28;28;24;18;16;14;9;3;2;1	28;28;28;27;27;23;17;16;13;9;3;2;1	28;28;28;27;27;23;17;16;13;9;3;2;1	Ras GTPase-activating-like protein IQGAP2	IQGAP2	>tr|F5H7S7|F5H7S7_HUMAN Ras GTPase-activating-like protein IQGAP2 OS=Homo sapiens GN=IQGAP2 PE=1 SV=2;>tr|A0A024RAJ8|A0A024RAJ8_HUMAN IQ motif containing GTPase activating protein 2, isoform CRA_b OS=Homo sapiens GN=IQGAP2 PE=4 SV=1;>sp|Q13576|IQGA2_HUMAN	13	29	28	28	1	1	9	9	8	9	5	5	9	10	6	7	16	17	4	5	4	4	8	8	3	3	1	1	8	8	8	9	5	5	8	9	6	7	15	16	4	5
B3KVA7;B2R8A3;A0A024RAK5;P17540;D6RHV3;D6R998	B3KVA7;B2R8A3;A0A024RAK5;P17540;D6RHV3;D6R998	2;2;2;2;1;1	1;1;1;1;1;1	1;1;1;1;1;1	Creatine kinase S-type, mitochondrial	CKMT2	>tr|B3KVA7|B3KVA7_HUMAN cDNA FLJ16309 fis, clone SKMUS2007816, highly similar to Creatine kinase, sarcomeric mitochondrial (EC 2.7.3.2) OS=Homo sapiens PE=2 SV=1;>tr|B2R8A3|B2R8A3_HUMAN cDNA, FLJ93805, highly similar to Homo sapiens creatine kinase, mitoch	6	2	1	1	0	0	0	0	1	1	0	0	0	0	0	0	1	1	0	0	0	0	0	0	0	0	0	0	0	0	1	1	0	0	0	0	0	0	0	0	0	0
B4DTL8;E9PGC0;B4DTX4;A0A024RAL2;P20936	B4DTL8;E9PGC0;B4DTX4;A0A024RAL2;P20936	2;2;2;2;2	2;2;2;2;2	2;2;2;2;2	Ras GTPase-activating protein 1	RASA1	>tr|B4DTL8|B4DTL8_HUMAN cDNA FLJ61389, highly similar to Ras GTPase-activating protein 1 OS=Homo sapiens PE=2 SV=1;>tr|E9PGC0|E9PGC0_HUMAN Ras GTPase-activating protein 1 OS=Homo sapiens GN=RASA1 PE=1 SV=1;>tr|B4DTX4|B4DTX4_HUMAN cDNA FLJ59756, highly simi	5	2	2	2	0	0	0	0	0	0	0	0	1	1	0	0	0	0	1	1	0	0	1	1	1	1	0	0	0	0	0	0	0	0	1	1	0	0	0	0	1	1
A0A024RAM0;Q92973;B4DSC0;E7EW37;S4R398	A0A024RAM0;Q92973	14;14;3;3;3	14;14;3;3;3	9;9;2;2;2	Transportin-1	TNPO1	>tr|A0A024RAM0|A0A024RAM0_HUMAN Transportin 1, isoform CRA_a OS=Homo sapiens GN=TNPO1 PE=4 SV=1;>sp|Q92973|TNPO1_HUMAN Transportin-1 OS=Homo sapiens GN=TNPO1 PE=1 SV=2	5	14	14	9	1	1	3	4	9	7	6	6	4	4	0	0	6	6	4	4	3	3	4	4	3	3	1	1	3	4	9	7	6	6	4	4	0	0	6	6	4	4
A0A024RAM2;P35754;D3DQK5	A0A024RAM2;P35754	6;6;1	6;6;1	6;6;1	Glutaredoxin-1	GLRX	>tr|A0A024RAM2|A0A024RAM2_HUMAN Glutaredoxin (Thioltransferase), isoform CRA_c OS=Homo sapiens GN=GLRX PE=4 SV=1;>sp|P35754|GLRX1_HUMAN Glutaredoxin-1 OS=Homo sapiens GN=GLRX PE=1 SV=2	3	6	6	6	2	3	4	4	4	4	1	1	4	4	1	1	3	3	1	1	2	2	4	4	2	3	2	3	4	4	4	4	1	1	4	4	1	1	3	3	1	1
A0A024RAR8;A0A0A7E6I2;A8K6H1;A0A0A7E7X3;A0A0A7E6D8;A0A0A7E6J5;A0A0A7E6D4;A0A0A7E6P4;A0A0A7E6K0;A0A075BSP6;A0A075BW43;A0A075BTL2;Q53GQ8;H0Y9X5;A0A0P0LIR5;D6RAL9	A0A024RAR8;A0A0A7E6I2;A8K6H1;A0A0A7E7X3;A0A0A7E6D8;A0A0A7E6J5;A0A0A7E6D4;A0A0A7E6P4;A0A0A7E6K0;A0A075BSP6;A0A075BW43;A0A075BTL2	22;21;21;21;21;20;20;19;18;16;13;11;7;3;1;1	22;21;21;21;21;20;20;19;18;16;13;11;7;3;1;1	1;1;1;1;1;1;1;1;0;1;1;0;0;0;0;0		ARTS-1	>tr|A0A024RAR8|A0A024RAR8_HUMAN Type 1 tumor necrosis factor receptor shedding aminopeptidase regulator, isoform CRA_a OS=Homo sapiens GN=ARTS-1 PE=4 SV=1;>tr|A0A0A7E6I2|A0A0A7E6I2_HUMAN Endoplasmic reticulum aminopeptidase 1 (Fragment) OS=Homo sapiens GN=	16	22	22	1	5	5	13	13	6	5	1	1	7	8	5	5	7	7	2	2	12	11	8	7	5	5	5	5	13	13	6	5	1	1	7	8	5	5	7	7	2	2
F5H3P3;H0YGX7;B2R4F3;A0A024RAS5;P52566;F5H2R5;F5H6Q0	F5H3P3;H0YGX7;B2R4F3;A0A024RAS5;P52566;F5H2R5;F5H6Q0	2;2;2;2;2;1;1	2;2;2;2;2;1;1	2;2;2;2;2;1;1	Rho GDP-dissociation inhibitor 2	ARHGDIB	>tr|F5H3P3|F5H3P3_HUMAN Rho GDP-dissociation inhibitor 2 (Fragment) OS=Homo sapiens GN=ARHGDIB PE=1 SV=8;>tr|H0YGX7|H0YGX7_HUMAN Rho GDP-dissociation inhibitor 2 (Fragment) OS=Homo sapiens GN=ARHGDIB PE=1 SV=1;>tr|B2R4F3|B2R4F3_HUMAN cDNA, FLJ92068, highly	7	2	2	2	0	0	0	0	0	0	0	0	0	0	2	2	0	0	0	0	0	0	0	0	0	0	0	0	0	0	0	0	0	0	0	0	2	2	0	0	0	0
A0A024RAS8;Q9NRV9;F5GWX2;H0YG71	A0A024RAS8;Q9NRV9;F5GWX2	15;15;9;3	15;15;9;3	15;15;9;3	Heme-binding protein 1	HEBP1	>tr|A0A024RAS8|A0A024RAS8_HUMAN Heme binding protein 1, isoform CRA_a OS=Homo sapiens GN=HEBP1 PE=4 SV=1;>sp|Q9NRV9|HEBP1_HUMAN Heme-binding protein 1 OS=Homo sapiens GN=HEBP1 PE=1 SV=1;>tr|F5GWX2|F5GWX2_HUMAN Heme-binding protein 1 OS=Homo sapiens GN=HEBP	4	15	15	15	4	4	7	7	9	9	7	6	6	5	1	1	7	7	6	6	7	7	6	6	6	6	4	4	7	7	9	9	7	6	6	5	1	1	7	7	6	6
A0A024RAV5	A0A024RAV5	8	1	1		KRAS	>tr|A0A024RAV5|A0A024RAV5_HUMAN V-Ki-ras2 Kirsten rat sarcoma viral oncogene homolog, isoform CRA_b OS=Homo sapiens GN=KRAS PE=1 SV=1	1	8	1	1	2	2	2	3	6	6	3	4	3	3	3	3	6	5	2	2	1	1	5	4	3	3	1	1	0	0	1	1	0	0	0	0	0	0	0	0	0	0
I6L965;F8VZY9;B2RA03;A0A024RAY2;P05783;CON__H-INV:HIT000015463;CON__Q92764;C4AM86;CON__Q497I4;A0A024R1T2;Q92764;CON__Q14525;Q6A165;CON__Q9UE12;CON__Q15323;CON__A2A5Y0;CON__A2AB72;CON__O76015;CON__O76014;CON__REFSEQ:XP_986630;Q14525;Q15323;O76014;O76015	I6L965;F8VZY9;B2RA03;A0A024RAY2;P05783	18;18;18;18;18;2;2;2;2;2;2;1;1;1;1;1;1;1;1;1;1;1;1;1	17;17;17;17;17;2;1;1;1;1;1;0;0;0;0;0;0;0;0;0;0;0;0;0	8;8;8;8;8;1;1;1;1;1;1;0;0;0;0;0;0;0;0;0;0;0;0;0	Keratin, type I cytoskeletal 18	KRT18	>tr|I6L965|I6L965_HUMAN KRT18 protein (Fragment) OS=Homo sapiens GN=KRT18 PE=2 SV=1;>tr|F8VZY9|F8VZY9_HUMAN Keratin, type I cytoskeletal 18 OS=Homo sapiens GN=KRT18 PE=1 SV=1;>tr|B2RA03|B2RA03_HUMAN cDNA, FLJ94640, highly similar to Homo sapiens keratin 18	24	18	17	8	6	6	9	12	7	6	1	0	8	9	0	0	10	7	5	5	9	9	10	8	8	7	6	6	8	11	6	5	1	0	7	8	0	0	10	7	5	5
F8VV56;A0A024RB05;P08962;F8W022;F8VWK8;W6A4U0;F8VNT9	F8VV56;A0A024RB05;P08962;F8W022;F8VWK8;W6A4U0;F8VNT9	6;6;6;5;5;5;3	6;6;6;5;5;5;3	6;6;6;5;5;5;3	CD63 antigen	CD63	>tr|F8VV56|F8VV56_HUMAN CD63 antigen OS=Homo sapiens GN=CD63 PE=1 SV=1;>tr|A0A024RB05|A0A024RB05_HUMAN Tetraspanin OS=Homo sapiens GN=CD63 PE=3 SV=1;>sp|P08962|CD63_HUMAN CD63 antigen OS=Homo sapiens GN=CD63 PE=1 SV=2;>tr|F8W022|F8W022_HUMAN Tetraspanin (F	7	6	6	6	2	2	2	2	5	5	1	1	3	3	1	1	3	3	1	1	2	2	1	1	2	2	2	2	2	2	5	5	1	1	3	3	1	1	3	3	1	1
F8W0R1;F8VPA6;A0A024RB08;A0A087WU02;Q9HC06;Q96RQ1;F8VR88;F8VUZ2;H0YI50	F8W0R1;F8VPA6;A0A024RB08;A0A087WU02;Q9HC06;Q96RQ1;F8VR88;F8VUZ2;H0YI50	2;2;2;2;2;2;1;1;1	2;2;2;2;2;2;1;1;1	2;2;2;2;2;2;1;1;1	Endoplasmic reticulum-Golgi intermediate compartment protein 2	RLN3;ERGIC2	>tr|F8W0R1|F8W0R1_HUMAN Endoplasmic reticulum-Golgi intermediate compartment protein 2 (Fragment) OS=Homo sapiens GN=ERGIC2 PE=1 SV=1;>tr|F8VPA6|F8VPA6_HUMAN Endoplasmic reticulum-Golgi intermediate compartment protein 2 (Fragment) OS=Homo sapiens GN=ERGIC	9	2	2	2	0	0	0	0	2	2	0	0	0	0	0	0	0	0	0	0	0	0	0	0	0	0	0	0	0	0	2	2	0	0	0	0	0	0	0	0	0	0
A0A024RB09;P61020;Q6FI54;F8VUA5;F8VVZ0;F8VPW9;F8VWZ7	A0A024RB09;P61020;Q6FI54;F8VUA5;F8VVZ0	10;10;9;6;5;3;3	6;6;6;2;1;1;1	6;6;6;2;1;1;1	Ras-related protein Rab-5B	RAB5B	>tr|A0A024RB09|A0A024RB09_HUMAN RAB5B, member RAS oncogene family, isoform CRA_a OS=Homo sapiens GN=RAB5B PE=4 SV=1;>sp|P61020|RAB5B_HUMAN Ras-related protein Rab-5B OS=Homo sapiens GN=RAB5B PE=1 SV=1;>tr|Q6FI54|Q6FI54_HUMAN RAB5B protein OS=Homo sapiens G	7	10	6	6	6	6	7	7	7	7	3	4	7	7	4	2	8	7	5	5	6	7	7	7	7	7	3	3	3	3	3	3	2	3	4	4	2	1	5	4	3	3
A0A024RB14;Q5JNZ5;P62854;Q75MH1;Q76N57	A0A024RB14;Q5JNZ5;P62854;Q75MH1	4;4;4;3;1	4;4;4;3;1	4;4;4;3;1	Putative 40S ribosomal protein S26-like 1;40S ribosomal protein S26	RPS26;RPS26P11	>tr|A0A024RB14|A0A024RB14_HUMAN HCG20716 OS=Homo sapiens GN=RPS26 PE=4 SV=1;>sp|Q5JNZ5|RS26L_HUMAN Putative 40S ribosomal protein S26-like 1 OS=Homo sapiens GN=RPS26P11 PE=5 SV=1;>sp|P62854|RS26_HUMAN 40S ribosomal protein S26 OS=Homo sapiens GN=RPS26 PE=1	5	4	4	4	1	1	2	2	0	0	1	1	2	1	0	0	1	1	0	0	1	1	1	1	2	2	1	1	2	2	0	0	1	1	2	1	0	0	1	1	0	0
A0A024RB23;P23743;G3V4E1;B4E0C6;H0YJE7;F8W1H7;H0YJH4	A0A024RB23;P23743;G3V4E1;B4E0C6	8;8;7;4;3;1;1	8;8;7;4;3;1;1	8;8;7;4;3;1;1	Diacylglycerol kinase;Diacylglycerol kinase alpha	DGKA	>tr|A0A024RB23|A0A024RB23_HUMAN Diacylglycerol kinase OS=Homo sapiens GN=DGKA PE=3 SV=1;>sp|P23743|DGKA_HUMAN Diacylglycerol kinase alpha OS=Homo sapiens GN=DGKA PE=1 SV=3;>tr|G3V4E1|G3V4E1_HUMAN Diacylglycerol kinase (Fragment) OS=Homo sapiens GN=DGKA PE=	7	8	8	8	0	0	0	0	1	1	0	0	1	1	0	0	1	2	2	3	0	0	1	1	0	0	0	0	0	0	1	1	0	0	1	1	0	0	1	2	2	3
A0A024RB32;A0A087WYT3;B3KUY2;Q15185;B4DDC6	A0A024RB32;A0A087WYT3;B3KUY2;Q15185	7;7;7;7;3	7;7;7;7;3	7;7;7;7;3	Prostaglandin E synthase 3	PTGES3	>tr|A0A024RB32|A0A024RB32_HUMAN Prostaglandin E synthase 3 (Cytosolic), isoform CRA_a OS=Homo sapiens GN=PTGES3 PE=4 SV=1;>tr|A0A087WYT3|A0A087WYT3_HUMAN Prostaglandin E synthase 3 OS=Homo sapiens GN=PTGES3 PE=1 SV=1;>tr|B3KUY2|B3KUY2_HUMAN Prostaglandin E	5	7	7	7	4	4	7	7	5	5	3	3	5	5	0	0	5	6	3	3	6	6	7	7	7	7	4	4	7	7	5	5	3	3	5	5	0	0	5	6	3	3
F8W1N5;F8VZJ2;F8VNW4;F8W0W4;H0YHX9;A0A024RB41;Q13765;E9PAV3;F8VZ58;A8K6N6;B4DDI8;Q9BZK3	F8W1N5;F8VZJ2;F8VNW4;F8W0W4;H0YHX9;A0A024RB41;Q13765;E9PAV3;F8VZ58;A8K6N6;B4DDI8;Q9BZK3	2;2;2;2;2;2;2;2;1;1;1;1	2;2;2;2;2;2;2;2;1;1;1;1	2;2;2;2;2;2;2;2;1;1;1;1	Nascent polypeptide-associated complex subunit alpha;Nascent polypeptide-associated complex subunit alpha, muscle-specific form;Putative nascent polypeptide-associated complex subunit alpha-like protein	NACA;hCG_2016482;NACAP1	>tr|F8W1N5|F8W1N5_HUMAN Nascent polypeptide-associated complex subunit alpha (Fragment) OS=Homo sapiens GN=NACA PE=1 SV=1;>tr|F8VZJ2|F8VZJ2_HUMAN Nascent polypeptide-associated complex subunit alpha OS=Homo sapiens GN=NACA PE=1 SV=1;>tr|F8VNW4|F8VNW4_HUMAN	12	2	2	2	0	0	0	0	1	1	2	2	1	1	0	0	1	1	1	1	0	0	0	0	0	0	0	0	0	0	1	1	2	2	1	1	0	0	1	1	1	1
F8VXB1;F8VUC5;F8W156;F8VXR1;F8VYZ4;Q53FU3;A0A024RB72;F8VVA7;P61923;F8W651	F8VXB1;F8VUC5;F8W156;F8VXR1;F8VYZ4;Q53FU3;A0A024RB72;F8VVA7;P61923;F8W651	2;2;2;2;2;2;2;2;2;1	2;2;2;2;2;2;2;2;2;1	2;2;2;2;2;2;2;2;2;1	Coatomer subunit zeta-1	COPZ1	>tr|F8VXB1|F8VXB1_HUMAN Coatomer subunit zeta-1 (Fragment) OS=Homo sapiens GN=COPZ1 PE=1 SV=1;>tr|F8VUC5|F8VUC5_HUMAN Coatomer subunit zeta-1 OS=Homo sapiens GN=COPZ1 PE=1 SV=1;>tr|F8W156|F8W156_HUMAN Coatomer subunit zeta-1 OS=Homo sapiens GN=COPZ1 PE=1 S	10	2	2	2	0	0	0	0	1	1	0	0	1	1	0	0	1	1	0	0	0	0	1	0	0	1	0	0	0	0	1	1	0	0	1	1	0	0	1	1	0	0
A8K6Y1;Q6PIN5;A0A024RB85;Q9UQ80;Q05D08;F8VR77;F8W0A3;H0YIN7;F8VZ69	A8K6Y1;Q6PIN5;A0A024RB85;Q9UQ80;Q05D08;F8VR77	17;17;17;17;16;9;6;5;2	17;17;17;17;16;9;6;5;2	17;17;17;17;16;9;6;5;2	Proliferation-associated protein 2G4	PA2G4	>tr|A8K6Y1|A8K6Y1_HUMAN cDNA FLJ75526, highly similar to Homo sapiens proliferation-associated 2G4, 38kDa (PA2G4), mRNA (Fragment) OS=Homo sapiens PE=2 SV=1;>tr|Q6PIN5|Q6PIN5_HUMAN PA2G4 protein (Fragment) OS=Homo sapiens GN=PA2G4 PE=2 SV=1;>tr|A0A024RB85|	9	17	17	17	4	5	5	6	13	14	6	6	8	7	3	3	13	13	5	5	5	4	3	2	8	7	4	5	5	6	13	14	6	6	8	7	3	3	13	13	5	5
A0A024RB87;P61224;E7ESV4;A0A0J9YXB3;F5H7Y6;A6NIZ1;F5GX62;F5H823;B7ZB78;F5GZG1;Q9BXV4;F5H004;B7ZAY2;F5H6R7;F5H4H0;F5GYH7;F5H077;F5GWU8;F5H491;F5H0B7;F5H500;F5GYB5;F8WBC0	A0A024RB87;P61224;E7ESV4;A0A0J9YXB3;F5H7Y6;A6NIZ1;F5GX62;F5H823;B7ZB78;F5GZG1;Q9BXV4;F5H004;B7ZAY2;F5H6R7	12;12;10;10;10;10;9;8;8;8;8;7;7;6;4;4;4;4;4;4;4;4;2	3;3;3;3;3;3;2;3;3;3;2;2;1;2;0;0;0;0;0;0;0;0;0	3;3;3;3;3;3;2;3;3;3;2;2;1;2;0;0;0;0;0;0;0;0;0	Ras-related protein Rap-1b;Ras-related protein Rap-1b-like protein	RAP1B	>tr|A0A024RB87|A0A024RB87_HUMAN RAP1B, member of RAS oncogene family, isoform CRA_a OS=Homo sapiens GN=RAP1B PE=4 SV=1;>sp|P61224|RAP1B_HUMAN Ras-related protein Rap-1b OS=Homo sapiens GN=RAP1B PE=1 SV=1;>tr|E7ESV4|E7ESV4_HUMAN Ras-related protein Rap-1b (	23	12	3	3	8	7	9	9	10	9	5	5	9	9	7	7	9	9	6	6	7	7	10	10	8	8	1	1	1	1	3	3	1	1	1	1	1	1	1	1	1	1
A0A024RBA9;Q9UL25;Q96GX3	A0A024RBA9;Q9UL25;Q96GX3	11;11;7	11;11;7	11;11;7	Ras-related protein Rab-21	RAB21	>tr|A0A024RBA9|A0A024RBA9_HUMAN RAB21, member RAS oncogene family, isoform CRA_a OS=Homo sapiens GN=RAB21 PE=4 SV=1;>sp|Q9UL25|RAB21_HUMAN Ras-related protein Rab-21 OS=Homo sapiens GN=RAB21 PE=1 SV=3;>tr|Q96GX3|Q96GX3_HUMAN KIAA0118 protein (Fragment) OS=	3	11	11	11	2	2	9	8	6	5	3	2	4	3	0	0	4	5	4	4	5	5	7	7	9	9	2	2	9	8	6	5	3	2	4	3	0	0	4	5	4	4
H0YHC3;F8W020;F8W118;F8VXI6;F8VUX1;F8VY35;F8VV59;B7Z9C2;A0A024RBE6;F8W0J6;F5H4R6;B7Z2V4;H0YIV4;A0A024RBB7;P55209;H0YH88;F8W543;F8VRJ2;B7Z5H0;F8VVB5	H0YHC3;F8W020;F8W118;F8VXI6;F8VUX1;F8VY35;F8VV59;B7Z9C2;A0A024RBE6;F8W0J6;F5H4R6;B7Z2V4;H0YIV4;A0A024RBB7;P55209;H0YH88;F8W543;F8VRJ2;B7Z5H0;F8VVB5	6;6;6;6;6;6;6;6;6;6;6;6;6;6;6;5;5;4;4;3	4;4;4;4;4;4;4;4;4;4;4;4;4;4;4;3;3;2;2;1	4;4;4;4;4;4;4;4;4;4;4;4;4;4;4;3;3;2;2;1	Nucleosome assembly protein 1-like 1	NAP1L1	>tr|H0YHC3|H0YHC3_HUMAN Nucleosome assembly protein 1-like 1 (Fragment) OS=Homo sapiens GN=NAP1L1 PE=1 SV=1;>tr|F8W020|F8W020_HUMAN Nucleosome assembly protein 1-like 1 (Fragment) OS=Homo sapiens GN=NAP1L1 PE=1 SV=1;>tr|F8W118|F8W118_HUMAN Nucleosome assem	20	6	4	4	1	1	3	3	6	6	2	2	2	2	0	0	1	1	1	1	3	3	1	1	1	1	0	0	3	3	4	4	2	2	2	2	0	0	1	1	1	1
B4DTT0;Q7Z3X3;H7C3P4;A8K6V6;A0A024RBC5;F6S8M0;B4E284;P15586;F5H4C6;H0YFA9;A0A0S2Z3S2	B4DTT0;Q7Z3X3;H7C3P4;A8K6V6;A0A024RBC5;F6S8M0;B4E284;P15586;F5H4C6;H0YFA9	9;9;9;9;9;9;9;9;5;5;3	9;9;9;9;9;9;9;9;5;5;3	9;9;9;9;9;9;9;9;5;5;3	N-acetylglucosamine-6-sulfatase	DKFZp686E12166;GNS	>tr|B4DTT0|B4DTT0_HUMAN N-acetylglucosamine-6-sulfatase OS=Homo sapiens PE=2 SV=1;>tr|Q7Z3X3|Q7Z3X3_HUMAN N-acetylglucosamine-6-sulfatase OS=Homo sapiens GN=DKFZp686E12166 PE=2 SV=1;>tr|H7C3P4|H7C3P4_HUMAN N-acetylglucosamine-6-sulfatase OS=Homo sapiens GN	11	9	9	9	0	0	1	1	2	2	0	0	2	2	1	1	5	4	0	0	2	2	0	0	4	3	0	0	1	1	2	2	0	0	2	2	1	1	5	4	0	0
A0A024RBD0;Q9NZJ9;B2RE29;A0A024RBG1;Q8NFP7;F8VRL4;F8VRR0;A0A0C4DGJ4	A0A024RBD0;Q9NZJ9;B2RE29;A0A024RBG1;Q8NFP7;F8VRL4;F8VRR0;A0A0C4DGJ4	8;8;7;7;5;4;4;4	8;8;7;7;5;4;4;4	3;3;2;2;0;1;1;1	Diphosphoinositol polyphosphate phosphohydrolase 2;Diphosphoinositol polyphosphate phosphohydrolase 3-alpha	NUDT4;NUDT10	>tr|A0A024RBD0|A0A024RBD0_HUMAN Nudix (Nucleoside diphosphate linked moiety X)-type motif 4, isoform CRA_c OS=Homo sapiens GN=NUDT4 PE=4 SV=1;>sp|Q9NZJ9|NUDT4_HUMAN Diphosphoinositol polyphosphate phosphohydrolase 2 OS=Homo sapiens GN=NUDT4 PE=1 SV=2;>tr|B	8	8	8	3	4	4	6	6	3	4	3	3	6	6	3	3	5	5	3	3	5	5	4	4	6	6	4	4	6	6	3	4	3	3	6	6	3	3	5	5	3	3
A0A024RBE9;P21579;J3KQA0;A4FU00;A0A024R9B3;Q8N9I0;Q05BS5;Q4FD32;A0A024R4N8;O00445;C9JX50	A0A024RBE9;P21579;J3KQA0	14;14;13;5;5;5;2;2;2;2;1	14;14;13;5;5;5;2;2;2;2;1	14;14;13;5;5;5;2;2;2;2;1	Synaptotagmin-1	SYT1	>tr|A0A024RBE9|A0A024RBE9_HUMAN Synaptotagmin I, isoform CRA_a OS=Homo sapiens GN=SYT1 PE=4 SV=1;>sp|P21579|SYT1_HUMAN Synaptotagmin-1 OS=Homo sapiens GN=SYT1 PE=1 SV=1;>tr|J3KQA0|J3KQA0_HUMAN Synaptotagmin I, isoform CRA_b OS=Homo sapiens GN=SYT1 PE=1 SV=	11	14	14	14	2	3	7	7	11	11	3	4	1	2	0	0	6	6	2	2	6	6	7	7	6	7	2	3	7	7	11	11	3	4	1	2	0	0	6	6	2	2
B9EK57;A0A024RBI2;Q7Z3V4;F5H5T5;S4R3H8;F5H6D6	B9EK57;A0A024RBI2;Q7Z3V4;F5H5T5	3;3;3;2;1;1	3;3;3;2;1;1	3;3;3;2;1;1	Ubiquitin-protein ligase E3B	UBE3B	>tr|B9EK57|B9EK57_HUMAN Ubiquitin protein ligase E3B OS=Homo sapiens GN=UBE3B PE=2 SV=1;>tr|A0A024RBI2|A0A024RBI2_HUMAN Ubiquitin protein ligase E3B, isoform CRA_a OS=Homo sapiens GN=UBE3B PE=4 SV=1;>sp|Q7Z3V4|UBE3B_HUMAN Ubiquitin-protein ligase E3B OS=Ho	6	3	3	3	1	1	1	1	1	1	0	0	1	0	0	0	1	1	0	0	1	1	2	2	1	1	1	1	1	1	1	1	0	0	1	0	0	0	1	1	0	0
A0A024RBI7;Q9NZD2;F5H0U5;F5GZ49;E7CEM8;I3P687	A0A024RBI7;Q9NZD2;F5H0U5	11;11;10;3;2;2	11;11;10;3;2;2	7;7;6;3;2;2	Glycolipid transfer protein	GLTP	>tr|A0A024RBI7|A0A024RBI7_HUMAN Glycolipid transfer protein, isoform CRA_a OS=Homo sapiens GN=GLTP PE=4 SV=1;>sp|Q9NZD2|GLTP_HUMAN Glycolipid transfer protein OS=Homo sapiens GN=GLTP PE=1 SV=3;>tr|F5H0U5|F5H0U5_HUMAN Glycolipid transfer protein OS=Homo sap	6	11	11	7	2	2	4	4	6	6	4	4	4	4	2	2	4	4	3	3	1	1	9	9	5	5	2	2	4	4	6	6	4	4	4	4	2	2	4	4	3	3
Q8TBK5;Q8N5Z7;A0A024RBK3;Q9HBB3;Q02878;B2R4K7;B4DRX3;F8VZ45;U3KQR5;F8VR69;F8VZA3;F8VWR1;F8VU16	Q8TBK5;Q8N5Z7;A0A024RBK3;Q9HBB3;Q02878;B2R4K7;B4DRX3	13;13;13;13;13;12;11;4;4;2;2;2;2	13;13;13;13;13;12;11;4;4;2;2;2;2	13;13;13;13;13;12;11;4;4;2;2;2;2	60S ribosomal protein L6	RPL6	>tr|Q8TBK5|Q8TBK5_HUMAN 60S ribosomal protein L6 OS=Homo sapiens GN=RPL6 PE=2 SV=1;>tr|Q8N5Z7|Q8N5Z7_HUMAN 60S ribosomal protein L6 OS=Homo sapiens GN=RPL6 PE=2 SV=1;>tr|A0A024RBK3|A0A024RBK3_HUMAN 60S ribosomal protein L6 OS=Homo sapiens GN=RPL6 PE=3 SV=1	13	13	13	13	2	3	5	5	10	9	1	1	4	3	0	0	6	6	1	2	2	2	0	0	3	4	2	3	5	5	10	9	1	1	4	3	0	0	6	6	1	2
B7Z2S5;A0A087WSW9;Q6ZR44;A0A024RBK9;A0A140VKC9;A0A087WSY9;Q16881;E9PIR7;B2R5P6;F8W809;A0A182DWI3;E9PKD3;A0A0B4J225;E9PIZ5;E9PLT3;E9PKI4;Q6M1B7;A0A096LPD9;E7EWK1;A4FTY4;B3KUQ5;A0A096LPK7;Q17RE6;A0A182DWF2;D3YTF8;Q59ET7;A0A182DWF3;Q9NNW7	B7Z2S5;A0A087WSW9;Q6ZR44;A0A024RBK9;A0A140VKC9;A0A087WSY9;Q16881;E9PIR7;B2R5P6;F8W809;A0A182DWI3;E9PKD3	8;8;8;8;8;8;8;7;7;7;7;5;2;2;1;1;1;1;1;1;1;1;1;1;1;1;1;1	1;1;1;1;1;1;1;0;0;0;0;0;0;0;0;0;0;0;0;0;0;0;0;0;0;0;0;0	1;1;1;1;1;1;1;0;0;0;0;0;0;0;0;0;0;0;0;0;0;0;0;0;0;0;0;0	Thioredoxin reductase 1, cytoplasmic	TXNRD1;GML	>tr|B7Z2S5|B7Z2S5_HUMAN cDNA FLJ56075, highly similar to Thioredoxin reductase 1, cytoplasmic (EC 1.8.1.9) OS=Homo sapiens PE=2 SV=1;>tr|A0A087WSW9|A0A087WSW9_HUMAN Thioredoxin reductase 1, cytoplasmic OS=Homo sapiens GN=TXNRD1 PE=1 SV=1;>tr|Q6ZR44|Q6ZR44_	28	8	1	1	2	2	5	4	4	3	2	2	2	2	1	1	5	5	1	1	1	2	2	2	2	1	0	0	0	0	1	1	0	0	0	0	0	0	0	0	0	0
F8VXK3;A0A024RBL0;Q9NPF2	F8VXK3;A0A024RBL0;Q9NPF2	7;7;7	7;7;7	7;7;7	Carbohydrate sulfotransferase 11	CHST11	>tr|F8VXK3|F8VXK3_HUMAN Carbohydrate sulfotransferase 11 (Fragment) OS=Homo sapiens GN=CHST11 PE=1 SV=1;>tr|A0A024RBL0|A0A024RBL0_HUMAN Carbohydrate (Chondroitin 4) sulfotransferase 11, isoform CRA_a OS=Homo sapiens GN=CHST11 PE=4 SV=1;>sp|Q9NPF2|CHSTB_HUM	3	7	7	7	1	1	4	4	3	4	2	1	2	2	0	0	2	2	0	0	2	2	1	1	3	3	1	1	4	4	3	4	2	1	2	2	0	0	2	2	0	0
A0A024RBL2;Q96GA7;H0YIA2;H0YID3	A0A024RBL2;Q96GA7;H0YIA2;H0YID3	2;2;1;1	2;2;1;1	2;2;1;1	Serine dehydratase-like	SDSL	>tr|A0A024RBL2|A0A024RBL2_HUMAN Serine dehydratase-like, isoform CRA_a OS=Homo sapiens GN=SDSL PE=4 SV=1;>sp|Q96GA7|SDSL_HUMAN Serine dehydratase-like OS=Homo sapiens GN=SDSL PE=1 SV=1;>tr|H0YIA2|H0YIA2_HUMAN Serine dehydratase-like (Fragment) OS=Homo sapi	4	2	2	2	0	0	0	0	0	0	0	0	2	1	0	0	0	0	0	0	0	0	0	0	0	0	0	0	0	0	0	0	0	0	2	1	0	0	0	0	0	0
B2R6A0;A0A024RBN1;Q9Y478;F5H4Y8;F5H2X8;B4DVP2	B2R6A0;A0A024RBN1;Q9Y478;F5H4Y8;F5H2X8;B4DVP2	2;2;2;1;1;1	2;2;2;1;1;1	2;2;2;1;1;1	5-AMP-activated protein kinase subunit beta-1	PRKAB1	>tr|B2R6A0|B2R6A0_HUMAN cDNA, FLJ92856, highly similar to Homo sapiens protein kinase, AMP-activated, beta 1 non-catalytic subunit (PRKAB1), mRNA OS=Homo sapiens PE=2 SV=1;>tr|A0A024RBN1|A0A024RBN1_HUMAN Protein kinase, AMP-activated, beta 1 non-catalytic	6	2	2	2	0	0	1	0	0	0	0	0	0	0	0	0	1	1	1	2	0	0	0	0	0	0	0	0	1	0	0	0	0	0	0	0	0	0	1	1	1	2
Q9UPN1;F8VYE8;A0A024RBP2;P36873;F8VR82;F8W0W8;A0A087WYY5;B4DNE3;F8WE71;H0Y3Y6;F8W1A0;C4TNW5;C4TNW6	Q9UPN1;F8VYE8;A0A024RBP2;P36873;F8VR82;F8W0W8;A0A087WYY5	16;16;16;16;15;15;9;3;2;2;2;1;1	3;3;3;3;3;2;2;1;0;0;0;0;0	3;3;3;3;3;2;2;1;0;0;0;0;0	Serine/threonine-protein phosphatase;Serine/threonine-protein phosphatase PP1-gamma catalytic subunit	PPP1CC	>tr|Q9UPN1|Q9UPN1_HUMAN Serine/threonine-protein phosphatase (Fragment) OS=Homo sapiens GN=PPP1CC PE=3 SV=1;>tr|F8VYE8|F8VYE8_HUMAN Serine/threonine-protein phosphatase OS=Homo sapiens GN=PPP1CC PE=1 SV=1;>tr|A0A024RBP2|A0A024RBP2_HUMAN Serine/threonine-pr	13	16	3	3	3	3	8	7	12	12	3	3	5	6	3	3	11	10	5	5	4	5	8	9	8	7	0	0	1	1	3	3	0	0	2	2	1	1	1	1	1	1
A0A024RBQ3;B4DV02;A0A024RBP6;A0A024RBP8;A0A024RBQ0;Q96RR4;F5GZ00	A0A024RBQ3;B4DV02;A0A024RBP6;A0A024RBP8;A0A024RBQ0;Q96RR4;F5GZ00	4;4;4;4;4;4;3	4;4;4;4;4;4;3	4;4;4;4;4;4;3	Calcium/calmodulin-dependent protein kinase kinase 2	CAMKK2;KIF18B	>tr|A0A024RBQ3|A0A024RBQ3_HUMAN Calcium/calmodulin-dependent protein kinase kinase 2, beta, isoform CRA_e OS=Homo sapiens GN=CAMKK2 PE=3 SV=1;>tr|B4DV02|B4DV02_HUMAN cDNA FLJ53477, highly similar to Calcium/calmodulin-dependent protein kinase kinase 2 (EC	7	4	4	4	0	0	1	1	0	0	3	3	0	0	0	0	2	2	1	1	2	2	0	0	0	0	0	0	1	1	0	0	3	3	0	0	0	0	2	2	1	1
A0A024RBR1;P30622;J3KP58;Q59GJ4;F5H0N7;F5H6A0;B3KXA5;Q6P5Z9;F5H1T5;F6VGP8;Q86WU4;Q6Q318;O43667	A0A024RBR1;P30622;J3KP58;Q59GJ4;F5H0N7;F5H6A0	14;14;13;11;10;7;6;5;3;3;3;1;1	14;14;13;11;10;7;6;5;3;3;3;1;1	14;14;13;11;10;7;6;5;3;3;3;1;1	CAP-Gly domain-containing linker protein 1	RSN;CLIP1	>tr|A0A024RBR1|A0A024RBR1_HUMAN Restin (Reed-Steinberg cell-expressed intermediate filament-associated protein), isoform CRA_b OS=Homo sapiens GN=RSN PE=4 SV=1;>sp|P30622|CLIP1_HUMAN CAP-Gly domain-containing linker protein 1 OS=Homo sapiens GN=CLIP1 PE=1	13	14	14	14	0	0	3	5	0	0	1	1	1	2	0	0	6	7	3	4	1	2	1	1	5	5	0	0	3	5	0	0	1	1	1	2	0	0	6	7	3	4
A0A024RBR3;O43583;F8VVL1	A0A024RBR3;O43583;F8VVL1	4;4;3	4;4;3	4;4;3	Density-regulated protein	DENR	>tr|A0A024RBR3|A0A024RBR3_HUMAN Density-regulated protein OS=Homo sapiens GN=DENR PE=3 SV=1;>sp|O43583|DENR_HUMAN Density-regulated protein OS=Homo sapiens GN=DENR PE=1 SV=2;>tr|F8VVL1|F8VVL1_HUMAN Density-regulated protein OS=Homo sapiens GN=DENR PE=1 SV=	3	4	4	4	0	0	1	1	1	0	1	1	0	0	0	0	1	1	1	0	0	0	0	0	0	0	0	0	1	1	1	0	1	1	0	0	0	0	1	1	1	0
F8VU65;A8K4Z4;A0A024RBS2;P05388;Q6NSF2;F8VWS0;Q53HK9;Q53HW2;F8VPE8;G3V210;F8VW21;Q8NHW5;F8VQY6;F8VRK7;F8VZS0;B4E3D5;F8VS58;F8VWV4;F8W1K8;Q3MHV2	F8VU65;A8K4Z4;A0A024RBS2;P05388;Q6NSF2;F8VWS0;Q53HK9;Q53HW2;F8VPE8;G3V210;F8VW21;Q8NHW5;F8VQY6;F8VRK7;F8VZS0;B4E3D5;F8VS58;F8VWV4	10;10;10;10;9;9;9;9;8;8;8;8;7;7;7;7;6;5;1;1	10;10;10;10;9;9;9;9;8;8;8;8;7;7;7;7;6;5;1;1	10;10;10;10;9;9;9;9;8;8;8;8;7;7;7;7;6;5;1;1	60S acidic ribosomal protein P0;60S acidic ribosomal protein P0-like	RPLP0;RPLP0P6	>tr|F8VU65|F8VU65_HUMAN 60S acidic ribosomal protein P0 (Fragment) OS=Homo sapiens GN=RPLP0 PE=1 SV=1;>tr|A8K4Z4|A8K4Z4_HUMAN 60S acidic ribosomal protein P0 OS=Homo sapiens PE=2 SV=1;>tr|A0A024RBS2|A0A024RBS2_HUMAN 60S acidic ribosomal protein P0 OS=Homo	20	10	10	10	4	4	3	3	6	7	1	1	3	3	1	1	4	4	2	2	3	3	4	4	3	3	4	4	3	3	6	7	1	1	3	3	1	1	4	4	2	2
B7ZKQ9;A0A024RBS4;B3KW46;B4DZ71;A0A0S2Z3N2;B4E3I1;Q59FM4;Q8WTV0;F5H4X0;A0A0S2Z3I2;F5H5E8	B7ZKQ9;A0A024RBS4;B3KW46;B4DZ71;A0A0S2Z3N2;B4E3I1;Q59FM4;Q8WTV0;F5H4X0;A0A0S2Z3I2	7;7;6;6;6;6;6;6;5;4;3	7;7;6;6;6;6;6;6;5;4;3	7;7;6;6;6;6;6;6;5;4;3	Scavenger receptor class B member 1	SCARB1	>tr|B7ZKQ9|B7ZKQ9_HUMAN SCARB1 protein OS=Homo sapiens GN=SCARB1 PE=1 SV=1;>tr|A0A024RBS4|A0A024RBS4_HUMAN Scavenger receptor class B, member 1, isoform CRA_b OS=Homo sapiens GN=SCARB1 PE=3 SV=1;>tr|B3KW46|B3KW46_HUMAN cDNA FLJ42118 fis, clone TESTI2005610	11	7	7	7	0	1	2	1	3	4	1	0	1	1	0	0	5	5	2	2	0	0	4	4	3	3	0	1	2	1	3	4	1	0	1	1	0	0	5	5	2	2
A0A024RBU0;Q9H9H4;F5H4M0;F5H1F6	A0A024RBU0;Q9H9H4;F5H4M0;F5H1F6	9;9;7;6	9;9;7;6	9;9;7;6	Vacuolar protein sorting-associated protein 37B	VPS37B	>tr|A0A024RBU0|A0A024RBU0_HUMAN Vacuolar protein sorting 37B (Yeast), isoform CRA_b OS=Homo sapiens GN=VPS37B PE=4 SV=1;>sp|Q9H9H4|VP37B_HUMAN Vacuolar protein sorting-associated protein 37B OS=Homo sapiens GN=VPS37B PE=1 SV=1;>tr|F5H4M0|F5H4M0_HUMAN Vacuo	4	9	9	9	2	3	4	4	7	7	5	4	2	3	2	3	3	3	2	3	3	3	4	5	3	4	2	3	4	4	7	7	5	4	2	3	2	3	3	3	2	3
A0A024RBV2;Q86V21;Q49AJ4;Q9H7A6;E7EW25;B4E296;Q9H9K9;B9EIP9	A0A024RBV2;Q86V21	15;15;4;4;3;3;2;1	15;15;4;4;3;3;2;1	15;15;4;4;3;3;2;1	Acetoacetyl-CoA synthetase	AACS	>tr|A0A024RBV2|A0A024RBV2_HUMAN Acetoacetyl-CoA synthetase, isoform CRA_b OS=Homo sapiens GN=AACS PE=4 SV=1;>sp|Q86V21|AACS_HUMAN Acetoacetyl-CoA synthetase OS=Homo sapiens GN=AACS PE=1 SV=1	8	15	15	15	0	0	6	5	9	9	2	2	5	5	0	0	6	6	2	3	1	1	1	1	3	3	0	0	6	5	9	9	2	2	5	5	0	0	6	6	2	3
A0A024RBV5;P51151;A0A1B0GUI0;Q9NP90	A0A024RBV5;P51151	6;6;1;1	6;6;1;1	6;6;1;1	Ras-related protein Rab-9A	RAB9A	>tr|A0A024RBV5|A0A024RBV5_HUMAN RAB9A, member RAS oncogene family, isoform CRA_a OS=Homo sapiens GN=RAB9A PE=4 SV=1;>sp|P51151|RAB9A_HUMAN Ras-related protein Rab-9A OS=Homo sapiens GN=RAB9A PE=1 SV=1	4	6	6	6	0	0	0	0	2	2	2	1	0	0	0	0	3	3	2	2	1	1	2	2	0	0	0	0	0	0	2	2	2	1	0	0	0	0	3	3	2	2
A0A024RC00;Q9NRF8;Q9H6Q0	A0A024RC00;Q9NRF8	9;9;2	9;9;2	8;8;2	CTP synthase;CTP synthase 2	CTPS2	>tr|A0A024RC00|A0A024RC00_HUMAN CTP synthase OS=Homo sapiens GN=CTPS2 PE=3 SV=1;>sp|Q9NRF8|PYRG2_HUMAN CTP synthase 2 OS=Homo sapiens GN=CTPS2 PE=1 SV=1	3	9	9	8	3	4	3	3	5	5	1	1	3	3	0	0	6	5	3	3	2	2	4	4	4	4	3	4	3	3	5	5	1	1	3	3	0	0	6	5	3	3
E2ITE0;E2ITD8;A0A024RC21;O75952;J3KRI0;J3KT09;G9BQT7;J3KTE8;E2ITE2;B4DXA8;A0A0D9SFQ2	E2ITE0;E2ITD8;A0A024RC21;O75952;J3KRI0;J3KT09;G9BQT7;J3KTE8;E2ITE2;B4DXA8;A0A0D9SFQ2	2;2;2;2;1;1;1;1;1;1;1	2;2;2;2;1;1;1;1;1;1;1	2;2;2;2;1;1;1;1;1;1;1	Calcium-binding tyrosine phosphorylation-regulated protein	CABYR	>tr|E2ITE0|E2ITE0_HUMAN CABYRa OS=Homo sapiens PE=2 SV=1;>tr|E2ITD8|E2ITD8_HUMAN CABYRa OS=Homo sapiens PE=2 SV=1;>tr|A0A024RC21|A0A024RC21_HUMAN Calcium binding tyrosine-(Y)-phosphorylation regulated (Fibrousheathin 2), isoform CRA_c OS=Homo sapiens GN=CA	11	2	2	2	0	0	0	0	2	2	0	0	0	0	0	0	0	0	0	0	0	0	0	0	0	0	0	0	0	0	2	2	0	0	0	0	0	0	0	0	0	0
A0A024RC24;Q9P2X3;J3KT25;J3QQU0;J3QRS6	A0A024RC24;Q9P2X3;J3KT25	5;5;3;2;2	5;5;3;2;2	5;5;3;2;2	Protein IMPACT	IMPACT	>tr|A0A024RC24|A0A024RC24_HUMAN Impact homolog (Mouse), isoform CRA_c OS=Homo sapiens GN=IMPACT PE=4 SV=1;>sp|Q9P2X3|IMPCT_HUMAN Protein IMPACT OS=Homo sapiens GN=IMPACT PE=1 SV=2;>tr|J3KT25|J3KT25_HUMAN Protein IMPACT (Fragment) OS=Homo sapiens GN=IMPACT	5	5	5	5	0	0	1	1	0	1	1	1	0	0	0	0	2	2	1	0	0	0	1	1	1	2	0	0	1	1	0	1	1	1	0	0	0	0	2	2	1	0
Q6PCC9;J3QSA1;J3KSL8;A8K922;A0A024RC31;Q9Y2L5;J3QQJ5	Q6PCC9;J3QSA1;J3KSL8;A8K922;A0A024RC31;Q9Y2L5;J3QQJ5	2;2;2;2;2;2;1	2;2;2;2;2;2;1	2;2;2;2;2;2;1	Trafficking protein particle complex subunit 8	KIAA1012;TRAPPC8	>tr|Q6PCC9|Q6PCC9_HUMAN KIAA1012 protein OS=Homo sapiens GN=KIAA1012 PE=2 SV=1;>tr|J3QSA1|J3QSA1_HUMAN Trafficking protein particle complex subunit 8 OS=Homo sapiens GN=TRAPPC8 PE=1 SV=1;>tr|J3KSL8|J3KSL8_HUMAN Trafficking protein particle complex subunit	7	2	2	2	0	0	1	1	0	0	1	1	0	0	1	1	1	1	0	0	0	0	0	0	0	0	0	0	1	1	0	0	1	1	0	0	1	1	1	1	0	0
A0A024RC55;Q08431;B3KTQ2;A0A024RC59;F5GZN3;B4E396;A0A087WUV5	A0A024RC55;Q08431;B3KTQ2;A0A024RC59;F5GZN3;B4E396	18;18;17;16;15;15;3	18;18;17;16;15;15;3	2;2;2;0;2;2;0	Lactadherin;Lactadherin short form;Medin	MFGE8	>tr|A0A024RC55|A0A024RC55_HUMAN Milk fat globule-EGF factor 8 protein, isoform CRA_a OS=Homo sapiens GN=MFGE8 PE=4 SV=1;>sp|Q08431|MFGM_HUMAN Lactadherin OS=Homo sapiens GN=MFGE8 PE=1 SV=2;>tr|B3KTQ2|B3KTQ2_HUMAN cDNA FLJ38589 fis, clone HCHON2010074, high	7	18	18	2	4	4	10	10	11	12	4	4	10	10	8	8	10	10	9	9	7	7	8	8	4	4	4	4	10	10	11	12	4	4	10	10	8	8	10	10	9	9
A0A024RC61;P15144;Q59E93;B4DV63;H0YKT6;Q8IVL7;H0YLZ8;Q71E46;H0YMC1;REV__Q6ZWA5	A0A024RC61;P15144;Q59E93;B4DV63	72;72;71;49;4;3;2;2;2;1	72;72;71;49;4;3;2;2;2;1	25;25;25;2;4;0;2;2;1;0	Aminopeptidase N	ANPEP	>tr|A0A024RC61|A0A024RC61_HUMAN Alanyl (Membrane) aminopeptidase (Aminopeptidase N, aminopeptidase M, microsomal aminopeptidase, CD13, p150), isoform CRA_a OS=Homo sapiens GN=ANPEP PE=4 SV=1;>sp|P15144|AMPN_HUMAN Aminopeptidase N OS=Homo sapiens GN=ANPEP P	10	72	72	25	38	38	51	51	57	59	33	34	37	37	30	31	54	56	38	39	50	52	55	56	44	46	38	38	51	51	57	59	33	34	37	37	30	31	54	56	38	39
A0A024RC65;P46940;A4QPB0;A0A0J9YXZ5;H0YLE8;Q6P1N4;B4E2M0;Q5FWG8;B4DNP4;Q05DN7;Q96PA3;F2Z2E2;A2RRC9;Q86VI3;H0YKA5;A0A087X225;A0A087WWP1	A0A024RC65;P46940;A4QPB0;A0A0J9YXZ5;H0YLE8;Q6P1N4;B4E2M0	61;61;60;45;38;36;36;11;11;11;4;3;3;3;2;2;2	61;61;60;45;38;36;36;11;11;11;4;3;3;3;2;2;2	60;60;59;44;37;36;35;11;11;11;4;2;2;2;2;2;2	Ras GTPase-activating-like protein IQGAP1	hCG_1991735;IQGAP1	>tr|A0A024RC65|A0A024RC65_HUMAN HCG1991735, isoform CRA_a OS=Homo sapiens GN=hCG_1991735 PE=4 SV=1;>sp|P46940|IQGA1_HUMAN Ras GTPase-activating-like protein IQGAP1 OS=Homo sapiens GN=IQGAP1 PE=1 SV=1;>tr|A4QPB0|A4QPB0_HUMAN IQ motif containing GTPase activ	17	61	61	60	15	14	20	22	27	27	20	19	23	24	8	9	33	34	20	21	26	25	20	20	18	16	15	14	20	22	27	27	20	19	23	24	8	9	33	34	20	21
A0A024RC87;A0A140VJT8;P13489;E9PMJ3;E9PLZ3;E9PIM9;E9PIK5;E9PMN0;E9PMA9;E9PR82;E9PMI1	A0A024RC87;A0A140VJT8;P13489	26;25;25;10;10;10;9;6;5;1;1	26;25;25;10;10;10;9;6;5;1;1	14;13;13;10;10;10;9;6;5;1;1	Ribonuclease inhibitor	RNH1	>tr|A0A024RC87|A0A024RC87_HUMAN Ribonuclease/angiogenin inhibitor 1, isoform CRA_a OS=Homo sapiens GN=RNH1 PE=4 SV=1;>tr|A0A140VJT8|A0A140VJT8_HUMAN Testicular tissue protein Li 164 OS=Homo sapiens PE=2 SV=1;>sp|P13489|RINI_HUMAN Ribonuclease inhibitor OS=	11	26	26	14	10	10	10	10	17	18	13	13	11	13	7	7	11	11	9	8	10	10	8	8	12	12	10	10	10	10	17	18	13	13	11	13	7	7	11	11	9	8
B2R5T2;A0A024RC95;P47895;B4DYU3;H0Y2X5;Q7Z3A2;H0YKF9;B4E0M6;H0YNQ3;P30837;B4YAH7;H0YLT1;B5MCI0;B3KS32	B2R5T2;A0A024RC95;P47895;B4DYU3;H0Y2X5;Q7Z3A2	34;34;34;27;26;26;11;11;10;3;2;1;1;1	34;34;34;27;26;26;11;11;10;3;2;1;1;1	31;31;31;24;23;23;11;11;10;1;0;1;1;1	Aldehyde dehydrogenase family 1 member A3	ALDH1A3;DKFZp686G1675	>tr|B2R5T2|B2R5T2_HUMAN cDNA, FLJ92608, highly similar to Homo sapiens aldehyde dehydrogenase 1 family, member A3 (ALDH1A3), mRNA OS=Homo sapiens PE=2 SV=1;>tr|A0A024RC95|A0A024RC95_HUMAN Aldehyde dehydrogenase 1 family, member A3, isoform CRA_a OS=Homo sa	14	34	34	31	12	11	15	15	20	19	10	10	18	18	2	2	19	18	7	8	14	15	13	14	18	19	12	11	15	15	20	19	10	10	18	18	2	2	19	18	7	8
A0A024RCA7;P05387;H0YDD8	A0A024RCA7;P05387;H0YDD8	3;3;2	3;3;2	3;3;2	60S acidic ribosomal protein P2	RPLP2	>tr|A0A024RCA7|A0A024RCA7_HUMAN Ribosomal protein, large, P2, isoform CRA_a OS=Homo sapiens GN=RPLP2 PE=3 SV=1;>sp|P05387|RLA2_HUMAN 60S acidic ribosomal protein P2 OS=Homo sapiens GN=RPLP2 PE=1 SV=1;>tr|H0YDD8|H0YDD8_HUMAN 60S acidic ribosomal protein P2	3	3	3	3	1	1	1	1	2	2	3	3	1	1	1	1	1	1	1	1	1	1	1	1	1	1	1	1	1	1	2	2	3	3	1	1	1	1	1	1	1	1
E9PMR4;A0A024RCB3;P48509;E9PRJ3;Q53FU5;E9PLZ6;K4DIB7	E9PMR4;A0A024RCB3;P48509;E9PRJ3;Q53FU5	6;6;6;5;5;1;1	6;6;6;5;5;1;1	6;6;6;5;5;1;1	CD151 antigen	CD151	>tr|E9PMR4|E9PMR4_HUMAN Tetraspanin OS=Homo sapiens GN=CD151 PE=1 SV=1;>tr|A0A024RCB3|A0A024RCB3_HUMAN Tetraspanin OS=Homo sapiens GN=CD151 PE=3 SV=1;>sp|P48509|CD151_HUMAN CD151 antigen OS=Homo sapiens GN=CD151 PE=1 SV=3;>tr|E9PRJ3|E9PRJ3_HUMAN Tetraspani	7	6	6	6	4	4	5	5	4	4	2	2	5	5	2	2	4	4	2	2	3	3	4	4	3	3	4	4	5	5	4	4	2	2	5	5	2	2	4	4	2	2
E9PJK1;E9PRJ8;H0YDL9;H0YDJ9;A0A024RCB7;E9PIF1;A6NMH8;P60033;H0YEE2	E9PJK1;E9PRJ8;H0YDL9;H0YDJ9;A0A024RCB7;E9PIF1;A6NMH8;P60033	3;3;3;3;3;3;3;3;1	3;3;3;3;3;3;3;3;1	2;2;2;2;2;2;2;2;0	CD81 antigen	CD81	>tr|E9PJK1|E9PJK1_HUMAN Tetraspanin OS=Homo sapiens GN=CD81 PE=1 SV=1;>tr|E9PRJ8|E9PRJ8_HUMAN Tetraspanin (Fragment) OS=Homo sapiens GN=CD81 PE=1 SV=1;>tr|H0YDL9|H0YDL9_HUMAN Tetraspanin (Fragment) OS=Homo sapiens GN=CD81 PE=1 SV=1;>tr|H0YDJ9|H0YDJ9_HUMAN	9	3	3	2	1	1	1	1	3	3	3	3	0	1	1	2	1	1	2	2	1	2	0	0	1	1	1	1	1	1	3	3	3	3	0	1	1	2	1	1	2	2
C9J6D1;A0A024RCC9;B7ZAK9;B7ZB83;B4DS05;Q99733;C9JZI7;B7ZAC7;E9PNW0;E9PJJ2;E9PS34;E9PNJ7;A8MXH2;E9PKT8;E9PKI2;E9PP22;C9J1B1;H0YCI4	C9J6D1;A0A024RCC9;B7ZAK9;B7ZB83;B4DS05;Q99733;C9JZI7;B7ZAC7;E9PNW0;E9PJJ2;E9PS34;E9PNJ7;A8MXH2;E9PKT8;E9PKI2;E9PP22	8;8;8;8;8;8;7;7;6;6;6;6;6;6;4;4;3;2	8;8;8;8;8;8;7;7;6;6;6;6;6;6;4;4;3;2	6;6;6;6;6;6;5;5;4;4;4;4;4;4;4;4;3;2	Nucleosome assembly protein 1-like 4	NAP1L4	>tr|C9J6D1|C9J6D1_HUMAN Nucleosome assembly protein 1-like 4 (Fragment) OS=Homo sapiens GN=NAP1L4 PE=1 SV=1;>tr|A0A024RCC9|A0A024RCC9_HUMAN Nucleosome assembly protein 1-like 4, isoform CRA_b OS=Homo sapiens GN=NAP1L4 PE=3 SV=1;>tr|B7ZAK9|B7ZAK9_HUMAN cDNA	18	8	8	6	1	1	4	4	5	4	1	1	2	2	0	0	2	2	1	1	3	3	0	0	2	3	1	1	4	4	5	4	1	1	2	2	0	0	2	2	1	1
A0A140VJF6;A0A024RCE9;Q8IWQ3;E9PRY3;E9PPI2;H0YCS6;B4DM60;B4DLY3	A0A140VJF6;A0A024RCE9;Q8IWQ3;E9PRY3;E9PPI2;H0YCS6;B4DM60;B4DLY3	2;2;2;1;1;1;1;1	2;2;2;1;1;1;1;1	2;2;2;1;1;1;1;1	Serine/threonine-protein kinase BRSK2	BRSK2	>tr|A0A140VJF6|A0A140VJF6_HUMAN BR serine/threonine kinase 2, isoform CRA_a OS=Homo sapiens GN=BRSK2 PE=2 SV=1;>tr|A0A024RCE9|A0A024RCE9_HUMAN BR serine/threonine kinase 2, isoform CRA_c OS=Homo sapiens GN=BRSK2 PE=4 SV=1;>sp|Q8IWQ3|BRSK2_HUMAN Serine/thre	8	2	2	2	0	0	0	0	1	1	0	0	0	0	0	0	0	0	0	0	0	0	1	1	0	0	0	0	0	0	1	1	0	0	0	0	0	0	0	0	0	0
A8K067;B4DKY1;A0A024RCG3;B4DPV7;P49589;B4DI19;Q53HG6;A8MVQ3;Q59HE5;C9JLN0;E9PRS8;E9PLP0	A8K067;B4DKY1;A0A024RCG3;B4DPV7;P49589;B4DI19;Q53HG6;A8MVQ3	11;11;11;11;11;10;10;10;3;1;1;1	11;11;11;11;11;10;10;10;3;1;1;1	11;11;11;11;11;10;10;10;3;1;1;1	Cysteine--tRNA ligase, cytoplasmic	CARS	>tr|A8K067|A8K067_HUMAN cDNA FLJ75536, highly similar to Homo sapiens cysteinyl-tRNA synthetase (CARS), transcript variant1, mRNA (Fragment) OS=Homo sapiens PE=2 SV=1;>tr|B4DKY1|B4DKY1_HUMAN Cysteine--tRNA ligase, cytoplasmic OS=Homo sapiens GN=CARS PE=1 S	12	11	11	11	0	0	3	3	6	7	0	0	4	3	1	1	3	3	1	1	0	0	0	0	2	2	0	0	3	3	6	7	0	0	4	3	1	1	3	3	1	1
A0A0G2JNZ7;A0A0A0MSX3;A0A024RCQ1;A0A024RCL1;A0A024RCJ0;Q08345;E7ERI6;E7ETI3;A0A0G2JIA2;E7EPN2;H0Y717;E7EUP7;A2ABL2;A0A0G2JIZ7;B7Z3A2;E7EQ30;E7EPH4;Q6ZNR9;A2ABM8;A0A140T972;E7EVT1;E7ES06;E7ETX3;E7EUD5;E7EVW6;E7ERN0;A0A0G2JHK4;E7ESR9;A2ABL0	A0A0G2JNZ7;A0A0A0MSX3;A0A024RCQ1;A0A024RCL1;A0A024RCJ0;Q08345;E7ERI6;E7ETI3;A0A0G2JIA2;E7EPN2;H0Y717;E7EUP7;A2ABL2;A0A0G2JIZ7;B7Z3A2;E7EQ30;E7EPH4;Q6ZNR9;A2ABM8;A0A140T972	4;4;4;4;4;4;2;2;2;2;2;2;2;2;2;2;2;2;2;2;1;1;1;1;1;1;1;1;1	4;4;4;4;4;4;2;2;2;2;2;2;2;2;2;2;2;2;2;2;1;1;1;1;1;1;1;1;1	4;4;4;4;4;4;2;2;2;2;2;2;2;2;2;2;2;2;2;2;1;1;1;1;1;1;1;1;1	Epithelial discoidin domain-containing receptor 1	DDR1	>tr|A0A0G2JNZ7|A0A0G2JNZ7_HUMAN Epithelial discoidin domain-containing receptor 1 OS=Homo sapiens GN=DDR1 PE=1 SV=1;>tr|A0A0A0MSX3|A0A0A0MSX3_HUMAN Epithelial discoidin domain-containing receptor 1 OS=Homo sapiens GN=DDR1 PE=1 SV=1;>tr|A0A024RCQ1|A0A024RCQ	29	4	4	4	1	1	1	1	1	1	1	1	1	1	0	0	2	2	0	0	2	2	1	1	1	1	1	1	1	1	1	1	1	1	1	1	0	0	2	2	0	0
A0A024RCJ2;Q16778;P33778;P23527;P06899;Q8N257;Q6DRA6;Q6DN03	A0A024RCJ2;Q16778;P33778;P23527;P06899	9;9;9;9;9;4;2;2	9;9;9;9;9;4;2;2	1;1;1;1;1;1;1;1	Histone H2B;Histone H2B type 2-E;Histone H2B type 1-B;Histone H2B type 1-O;Histone H2B type 1-J	HIST1H2BJ;HIST2H2BE;HIST1H2BB;HIST1H2BO	>tr|A0A024RCJ2|A0A024RCJ2_HUMAN Histone H2B OS=Homo sapiens GN=HIST1H2BJ PE=3 SV=1;>sp|Q16778|H2B2E_HUMAN Histone H2B type 2-E OS=Homo sapiens GN=HIST2H2BE PE=1 SV=3;>sp|P33778|H2B1B_HUMAN Histone H2B type 1-B OS=Homo sapiens GN=HIST1H2BB PE=1 SV=2;>sp|P23	8	9	9	1	4	4	3	3	4	4	1	1	4	4	8	8	3	3	2	2	3	3	3	3	3	3	4	4	3	3	4	4	1	1	4	4	8	8	3	3	2	2
A0A024RCN6;P26640;A0A140T936;B4DT32;A0A140T954;A2ABF4;A0A0G2JJT9;A0A140T904;H0Y426	A0A024RCN6;P26640;A0A140T936;B4DT32	36;36;33;18;10;6;6;3;3	36;36;33;18;10;6;6;3;3	36;36;33;18;10;6;6;3;3	Valine--tRNA ligase	VARS	>tr|A0A024RCN6|A0A024RCN6_HUMAN Valyl-tRNA synthetase, isoform CRA_a OS=Homo sapiens GN=VARS PE=3 SV=1;>sp|P26640|SYVC_HUMAN Valine--tRNA ligase OS=Homo sapiens GN=VARS PE=1 SV=4;>tr|A0A140T936|A0A140T936_HUMAN Valine--tRNA ligase (Fragment) OS=Homo sapien	9	36	36	36	2	2	0	0	29	30	0	0	15	14	2	2	15	16	4	4	2	2	0	0	1	2	2	2	0	0	29	30	0	0	15	14	2	2	15	16	4	4
B4DYK6;A0A024RCR2;P36915;Q6P458;Q0EFC6;B7ZAS6;B4DNS8;A0A140T8Y2;Q96QB8;Q86Z07;B4DWZ0;A8MPZ0;A2AB27	B4DYK6;A0A024RCR2;P36915;Q6P458;Q0EFC6;B7ZAS6;B4DNS8;A0A140T8Y2;Q96QB8;Q86Z07;B4DWZ0	9;9;9;8;8;7;7;6;6;5;5;3;3	9;9;9;8;8;7;7;6;6;5;5;3;3	9;9;9;8;8;7;7;6;6;5;5;3;3	Guanine nucleotide-binding protein-like 1	GNL1;HSR1	>tr|B4DYK6|B4DYK6_HUMAN cDNA FLJ56887, highly similar to Homo sapiens guanine nucleotide binding protein-like 1 (GNL1), mRNA OS=Homo sapiens PE=2 SV=1;>tr|A0A024RCR2|A0A024RCR2_HUMAN Guanine nucleotide binding protein-like 1, isoform CRA_a OS=Homo sapiens	13	9	9	9	0	0	1	1	3	5	2	2	2	2	0	0	2	2	1	1	1	0	1	1	3	2	0	0	1	1	3	5	2	2	2	2	0	0	2	2	1	1
A0A0G2JL47;A0A024RCR6;A0A0G2JK23;P46379;F6S6P2;X6REW1;A0A0G2JJM1;F6UR09;F6U1F2;F6XTU0;A0A0G2JJR8;A0A1B0GX79;F6WML8;F6VEM6;F6X9W3;F6U341;H0Y4L1;F6TC96;H0Y710	A0A0G2JL47;A0A024RCR6;A0A0G2JK23;P46379;F6S6P2;X6REW1;A0A0G2JJM1	6;6;6;6;5;5;5;2;2;2;2;2;2;2;2;2;1;1;1	6;6;6;6;5;5;5;2;2;2;2;2;2;2;2;2;1;1;1	6;6;6;6;5;5;5;2;2;2;2;2;2;2;2;2;1;1;1	Large proline-rich protein BAG6	BAT3;BAG6	>tr|A0A0G2JL47|A0A0G2JL47_HUMAN Large proline-rich protein BAG6 OS=Homo sapiens GN=BAG6 PE=1 SV=1;>tr|A0A024RCR6|A0A024RCR6_HUMAN HLA-B associated transcript 3, isoform CRA_a OS=Homo sapiens GN=BAT3 PE=1 SV=1;>tr|A0A0G2JK23|A0A0G2JK23_HUMAN Large proline-r	19	6	6	6	0	0	0	1	2	3	0	0	1	2	0	0	3	3	1	1	1	0	0	0	0	0	0	0	0	1	2	3	0	0	1	2	0	0	3	3	1	1
A0A024RCX8;Q9Y3C6	A0A024RCX8;Q9Y3C6	4;4	4;4	4;4	Peptidyl-prolyl cis-trans isomerase;Peptidyl-prolyl cis-trans isomerase-like 1	PPIL1	>tr|A0A024RCX8|A0A024RCX8_HUMAN Peptidyl-prolyl cis-trans isomerase OS=Homo sapiens GN=PPIL1 PE=3 SV=1;>sp|Q9Y3C6|PPIL1_HUMAN Peptidyl-prolyl cis-trans isomerase-like 1 OS=Homo sapiens GN=PPIL1 PE=1 SV=1	2	4	4	4	1	1	3	3	0	0	1	1	1	1	0	0	2	2	1	1	1	1	1	1	1	1	1	1	3	3	0	0	1	1	1	1	0	0	2	2	1	1
A0A024RCZ8;Q9NSK0;C9J8T5;C9JZE5;H7C4M1;C9JXT5;C9JQU1;C9K0D5	A0A024RCZ8;Q9NSK0	38;38;18;10;6;5;5;5	35;35;16;8;5;5;5;5	30;30;14;6;3;5;5;5	Kinesin light chain 4	KLC4	>tr|A0A024RCZ8|A0A024RCZ8_HUMAN Kinesin light chain 4, isoform CRA_a OS=Homo sapiens GN=KLC4 PE=4 SV=1;>sp|Q9NSK0|KLC4_HUMAN Kinesin light chain 4 OS=Homo sapiens GN=KLC4 PE=1 SV=3	8	38	35	30	6	6	15	14	15	17	10	10	8	9	4	5	23	22	11	12	16	17	6	6	20	21	3	3	12	11	13	15	9	9	6	6	2	3	20	19	9	10
B5BTY5;A0A024RD04;A0A0S2Z542;O15264;Q5R3E6;Q59F75;Q53GK9;Q6FHR4	B5BTY5;A0A024RD04;A0A0S2Z542;O15264;Q5R3E6;Q59F75;Q53GK9;Q6FHR4	2;2;2;2;1;1;1;1	2;2;2;2;1;1;1;1	2;2;2;2;1;1;1;1	Mitogen-activated protein kinase 13	MAPK13	>tr|B5BTY5|B5BTY5_HUMAN Mitogen-activated protein kinase OS=Homo sapiens GN=MAPK13 PE=2 SV=1;>tr|A0A024RD04|A0A024RD04_HUMAN Mitogen-activated protein kinase OS=Homo sapiens GN=MAPK13 PE=2 SV=1;>tr|A0A0S2Z542|A0A0S2Z542_HUMAN Mitogen-activated protein kina	8	2	2	2	0	0	1	1	0	0	0	0	0	0	0	0	1	1	1	1	0	0	0	0	0	0	0	0	1	1	0	0	0	0	0	0	0	0	1	1	1	1
B4DSD7;E9PFR3;A0A024RD11;Q14738;Q59EF0;H0Y8C4;A8K6Y2;H7C5Q9;H0YN84;H0YJ49;H0YJ35	B4DSD7;E9PFR3;A0A024RD11;Q14738;Q59EF0;H0Y8C4;A8K6Y2	13;13;13;13;12;12;12;6;3;2;1	13;13;13;13;12;12;12;6;3;2;1	9;9;9;9;8;8;8;3;0;0;0	Serine/threonine-protein phosphatase 2A 56 kDa regulatory subunit delta isoform	PPP2R5D	>tr|B4DSD7|B4DSD7_HUMAN cDNA FLJ55863, highly similar to Serine/threonine-protein phosphatase 2A 56 kDa regulatory subunit delta isoform OS=Homo sapiens PE=2 SV=1;>tr|E9PFR3|E9PFR3_HUMAN Serine/threonine-protein phosphatase 2A 56 kDa regulatory subunit del	11	13	13	9	2	3	3	3	8	8	3	3	7	7	2	3	8	7	5	5	6	5	6	5	3	3	2	3	3	3	8	8	3	3	7	7	2	3	8	7	5	5
B2R6F9;A0A024RD18;Q15208;Q9UPD3	B2R6F9;A0A024RD18;Q15208;Q9UPD3	3;3;3;2	2;2;2;1	2;2;2;1	Serine/threonine-protein kinase 38	STK38	>tr|B2R6F9|B2R6F9_HUMAN cDNA, FLJ92932, highly similar to Homo sapiens serine/threonine kinase 38 (STK38), mRNA OS=Homo sapiens PE=2 SV=1;>tr|A0A024RD18|A0A024RD18_HUMAN Serine/threonine kinase 38, isoform CRA_a OS=Homo sapiens GN=STK38 PE=3 SV=1;>sp|Q1520	4	3	2	2	0	0	0	0	1	1	1	0	0	0	0	0	0	0	0	0	0	0	1	1	1	1	0	0	0	0	0	0	1	0	0	0	0	0	0	0	0	0
A0A024RD39;Q13093;A8K2W6;B4DG88;B4DLM5	A0A024RD39;Q13093;A8K2W6;B4DG88	16;16;15;10;7	16;16;15;10;7	16;16;15;10;7	Platelet-activating factor acetylhydrolase	PLA2G7	>tr|A0A024RD39|A0A024RD39_HUMAN Phospholipase A2, group VII (Platelet-activating factor acetylhydrolase, plasma), isoform CRA_a OS=Homo sapiens GN=PLA2G7 PE=4 SV=1;>sp|Q13093|PAFA_HUMAN Platelet-activating factor acetylhydrolase OS=Homo sapiens GN=PLA2G7 P	5	16	16	16	2	2	8	8	10	11	3	2	4	4	0	0	11	10	6	6	5	5	4	4	8	8	2	2	8	8	10	11	3	2	4	4	0	0	11	10	6	6
A0A024RD41;Q9ULC3	A0A024RD41;Q9ULC3	10;10	10;10	10;10	Ras-related protein Rab-23	RAB23	>tr|A0A024RD41|A0A024RD41_HUMAN RAB23, member RAS oncogene family, isoform CRA_a OS=Homo sapiens GN=RAB23 PE=4 SV=1;>sp|Q9ULC3|RAB23_HUMAN Ras-related protein Rab-23 OS=Homo sapiens GN=RAB23 PE=1 SV=1	2	10	10	10	1	1	3	3	8	8	3	3	4	4	0	1	5	5	2	1	5	5	3	3	4	4	1	1	3	3	8	8	3	3	4	4	0	1	5	5	2	1
A0A024RD74;P16562	A0A024RD74;P16562	6;6	6;6	6;6	Cysteine-rich secretory protein 2	CRISP2	>tr|A0A024RD74|A0A024RD74_HUMAN Cysteine-rich secretory protein 2, isoform CRA_a OS=Homo sapiens GN=CRISP2 PE=2 SV=1;>sp|P16562|CRIS2_HUMAN Cysteine-rich secretory protein 2 OS=Homo sapiens GN=CRISP2 PE=1 SV=1	2	6	6	6	1	0	0	0	4	4	1	1	1	1	4	4	2	2	0	0	0	0	0	0	0	0	1	0	0	0	4	4	1	1	1	1	4	4	2	2	0	0
A0A024RD80;P08238;B4DMA2;B4DGL0;Q9H6X9;A8K3W9;Q6PK50;Q58FF7;O14942;Q58FF4	A0A024RD80;P08238;B4DMA2;B4DGL0	48;48;47;45;23;23;20;17;5;1	33;33;32;32;17;17;11;8;2;1	28;28;27;27;14;14;9;7;2;1	Heat shock protein HSP 90-beta	HSP90AB1	>tr|A0A024RD80|A0A024RD80_HUMAN Heat shock protein 90kDa alpha (Cytosolic), class B member 1, isoform CRA_a OS=Homo sapiens GN=HSP90AB1 PE=3 SV=1;>sp|P08238|HS90B_HUMAN Heat shock protein HSP 90-beta OS=Homo sapiens GN=HSP90AB1 PE=1 SV=4;>tr|B4DMA2|B4DMA2_	10	48	33	28	28	28	30	31	39	39	28	28	32	33	21	21	35	35	25	26	33	33	31	30	33	33	17	17	21	21	27	28	19	19	21	21	11	11	22	22	16	16
A0A024RD93;P22234;E9PBS1;B4DGX3;D6RF62	A0A024RD93;P22234;E9PBS1;B4DGX3;D6RF62	20;20;18;14;13	20;20;18;14;13	20;20;18;14;13	Multifunctional protein ADE2;Phosphoribosylaminoimidazole-succinocarboxamide synthase;Phosphoribosylaminoimidazole carboxylase	PAICS	>tr|A0A024RD93|A0A024RD93_HUMAN Phosphoribosylaminoimidazole carboxylase, phosphoribosylaminoimidazole succinocarboxamide synthetase, isoform CRA_c OS=Homo sapiens GN=PAICS PE=3 SV=1;>sp|P22234|PUR6_HUMAN Multifunctional protein ADE2 OS=Homo sapiens GN=PAI	5	20	20	20	4	5	9	9	16	16	7	8	9	9	2	2	9	8	7	8	9	9	6	7	10	9	4	5	9	9	16	16	7	8	9	9	2	2	9	8	7	8
A0A024RDA1;A0A024RDA9;Q9NV70	A0A024RDA1;A0A024RDA9;Q9NV70	11;11;11	11;11;11	11;11;11	Exocyst complex component 1	EXOC1	>tr|A0A024RDA1|A0A024RDA1_HUMAN Exocyst complex component 1, isoform CRA_a OS=Homo sapiens GN=EXOC1 PE=4 SV=1;>tr|A0A024RDA9|A0A024RDA9_HUMAN Exocyst complex component 1, isoform CRA_b OS=Homo sapiens GN=EXOC1 PE=4 SV=1;>sp|Q9NV70|EXOC1_HUMAN Exocyst compl	3	11	11	11	2	2	6	6	7	6	1	1	4	5	0	0	6	6	2	1	4	3	6	6	5	5	2	2	6	6	7	6	1	1	4	5	0	0	6	6	2	1
A0A024RDB0;A0AVT1;B3KSS1;H0Y8S8;H0Y9U5	A0A024RDB0;A0AVT1;B3KSS1	33;33;26;9;1	33;33;26;9;1	33;33;26;9;1	Ubiquitin-like modifier-activating enzyme 6	UBE1L2;UBA6	>tr|A0A024RDB0|A0A024RDB0_HUMAN Ubiquitin-activating enzyme E1-like 2, isoform CRA_a OS=Homo sapiens GN=UBE1L2 PE=4 SV=1;>sp|A0AVT1|UBA6_HUMAN Ubiquitin-like modifier-activating enzyme 6 OS=Homo sapiens GN=UBA6 PE=1 SV=1;>tr|B3KSS1|B3KSS1_HUMAN cDNA FLJ368	5	33	33	33	2	2	13	13	21	20	5	6	11	11	0	0	15	16	10	10	10	12	12	10	12	15	2	2	13	13	21	20	5	6	11	11	0	0	15	16	10	10
E7ER42;E7ESB3;A0A024RDG4;B4DHX3;A0A024RDB9;Q13508;E9PGR5;E7EX61	E7ER42;E7ESB3;A0A024RDG4;B4DHX3;A0A024RDB9;Q13508	3;3;3;3;3;3;1;1	3;3;3;3;3;3;1;1	3;3;3;3;3;3;1;1	Ecto-ADP-ribosyltransferase 3	ART3	>tr|E7ER42|E7ER42_HUMAN NAD(P)(+)--arginine ADP-ribosyltransferase (Fragment) OS=Homo sapiens GN=ART3 PE=1 SV=8;>tr|E7ESB3|E7ESB3_HUMAN NAD(P)(+)--arginine ADP-ribosyltransferase (Fragment) OS=Homo sapiens GN=ART3 PE=1 SV=8;>tr|A0A024RDG4|A0A024RDG4_HUMAN	8	3	3	3	0	0	0	0	1	1	0	0	1	1	0	0	3	3	0	0	0	0	0	0	0	0	0	0	0	0	1	1	0	0	1	1	0	0	3	3	0	0
A0A024RDC1;Q96KC9	A0A024RDC1;Q96KC9	2;2	2;2	2;2	Calcium-binding and spermatid-specific protein 1	NYD-SP26;CABS1	>tr|A0A024RDC1|A0A024RDC1_HUMAN Testis development protein NYD-SP26, isoform CRA_a OS=Homo sapiens GN=NYD-SP26 PE=4 SV=1;>sp|Q96KC9|CABS1_HUMAN Calcium-binding and spermatid-specific protein 1 OS=Homo sapiens GN=CABS1 PE=2 SV=3	2	2	2	2	0	0	0	0	2	1	0	0	0	0	0	0	0	0	0	0	0	0	0	0	0	0	0	0	0	0	2	1	0	0	0	0	0	0	0	0	0	0
A0A024RDH6;A0A024RDD3;D6REX3;O94979;H7BXG7;D6RHZ5;H0YAB3;H0Y9K1;H0Y8V7;H0Y8W8;D6RBT0;D6RHE8;D6RE64;D6RCQ9;H0YAF5;H0Y9T9	A0A024RDH6;A0A024RDD3;D6REX3;O94979;H7BXG7;D6RHZ5;H0YAB3	18;18;18;18;16;14;10;7;7;4;1;1;1;1;1;1	18;18;18;18;16;14;10;7;7;4;1;1;1;1;1;1	18;18;18;18;16;14;10;7;7;4;1;1;1;1;1;1	Protein transport protein Sec31A	SEC31L1;SEC31A	>tr|A0A024RDH6|A0A024RDH6_HUMAN SEC31-like 1 (S. cerevisiae), isoform CRA_b OS=Homo sapiens GN=SEC31L1 PE=4 SV=1;>tr|A0A024RDD3|A0A024RDD3_HUMAN SEC31-like 1 (S. cerevisiae), isoform CRA_d OS=Homo sapiens GN=SEC31L1 PE=4 SV=1;>tr|D6REX3|D6REX3_HUMAN Protei	16	18	18	18	0	0	1	1	5	5	2	2	1	3	0	0	5	5	3	2	0	0	2	3	2	1	0	0	1	1	5	5	2	2	1	3	0	0	5	5	3	2
I7JB59;A0A024RDD4;Q9UNQ0;I4EPX2;F8S0F7;F8S0F6;F8S0F2;H0YAF3;H0YAF1;Q8WZ76	I7JB59;A0A024RDD4;Q9UNQ0	9;9;9;4;4;4;4;4;4;2	9;9;9;4;4;4;4;4;4;2	9;9;9;4;4;4;4;4;4;2	ATP-binding cassette sub-family G member 2	ABCG2	>tr|I7JB59|I7JB59_HUMAN ABCG2 protein OS=Homo sapiens GN=ABCG2 PE=3 SV=1;>tr|A0A024RDD4|A0A024RDD4_HUMAN ATP-binding cassette, sub-family G (WHITE), member 2, isoform CRA_a OS=Homo sapiens GN=ABCG2 PE=3 SV=1;>sp|Q9UNQ0|ABCG2_HUMAN ATP-binding cassette sub-	10	9	9	9	4	4	5	5	2	2	1	1	7	6	2	3	2	1	1	1	1	1	4	4	3	2	4	4	5	5	2	2	1	1	7	6	2	3	2	1	1	1
B4DG59;B4DKC2;A0A024RDD7;Q7L099;D6REM9;D6RCQ1	B4DG59;B4DKC2;A0A024RDD7;Q7L099	4;4;4;4;1;1	3;3;3;3;1;1	3;3;3;3;1;1	Protein RUFY3	RUFY3	>tr|B4DG59|B4DG59_HUMAN cDNA FLJ60105, highly similar to Protein RUFY3 OS=Homo sapiens PE=2 SV=1;>tr|B4DKC2|B4DKC2_HUMAN cDNA FLJ55802, highly similar to Protein RUFY3 OS=Homo sapiens PE=2 SV=1;>tr|A0A024RDD7|A0A024RDD7_HUMAN RUN and FYVE domain containing	6	4	3	3	0	0	2	2	0	0	0	0	1	0	0	0	2	3	2	2	0	0	1	1	0	0	0	0	1	1	0	0	0	0	0	0	0	0	2	3	1	1
B4E397;B4DNS6;B4DV72;Q8N4S1;A0A024RDE1;Q14515;B7ZB68;B4DFZ4	B4E397;B4DNS6;B4DV72;Q8N4S1;A0A024RDE1;Q14515;B7ZB68;B4DFZ4	13;13;13;13;13;13;10;8	13;13;13;13;13;13;10;8	13;13;13;13;13;13;10;8	SPARC-like protein 1	SPARCL1	>tr|B4E397|B4E397_HUMAN cDNA FLJ55140, highly similar to SPARC-like protein 1 OS=Homo sapiens PE=2 SV=1;>tr|B4DNS6|B4DNS6_HUMAN cDNA FLJ54278, highly similar to SPARC-like protein 1 OS=Homo sapiens PE=2 SV=1;>tr|B4DV72|B4DV72_HUMAN cDNA FLJ54387, moderatel	8	13	13	13	4	3	6	6	2	3	5	5	5	5	0	0	6	7	1	1	7	6	4	5	2	2	4	3	6	6	2	3	5	5	5	5	0	0	6	7	1	1
A0A024RDE8;Q96HC4;H0Y8Y3;Q4W5K9;A0A0A0MSP3;H0YBI4;A0A0D9SFR4;H0Y929;Q9P1D1	A0A024RDE8;Q96HC4;H0Y8Y3;Q4W5K9	20;20;11;10;9;7;4;3;2	20;20;11;10;9;7;4;3;2	1;1;0;1;0;0;1;0;0	PDZ and LIM domain protein 5	PDLIM5;LIM	>tr|A0A024RDE8|A0A024RDE8_HUMAN PDZ and LIM domain 5, isoform CRA_c OS=Homo sapiens GN=PDLIM5 PE=4 SV=1;>sp|Q96HC4|PDLI5_HUMAN PDZ and LIM domain protein 5 OS=Homo sapiens GN=PDLIM5 PE=1 SV=5;>tr|H0Y8Y3|H0Y8Y3_HUMAN PDZ and LIM domain protein 5 (Fragment)	9	20	20	1	7	6	12	12	9	10	4	5	9	8	1	2	13	14	8	8	9	9	12	10	11	11	7	6	12	12	9	10	4	5	9	8	1	2	13	14	8	8
A0A024RDG1;O60763;REV__R4GMN2;REV__Q5VZ89;REV__R4GNB2;REV__R4GN35	A0A024RDG1;O60763	19;19;1;1;1;1	19;19;1;1;1;1	19;19;1;1;1;1	General vesicular transport factor p115	VDP;USO1	>tr|A0A024RDG1|A0A024RDG1_HUMAN Vesicle docking protein p115, isoform CRA_a OS=Homo sapiens GN=VDP PE=4 SV=1;>sp|O60763|USO1_HUMAN General vesicular transport factor p115 OS=Homo sapiens GN=USO1 PE=1 SV=2	6	19	19	19	2	2	6	4	12	11	7	7	6	7	3	3	9	9	4	5	4	4	7	6	7	8	2	2	6	4	12	11	7	7	6	7	3	3	9	9	4	5
A0A024RDG6;Q14108;D6RDG0	A0A024RDG6;Q14108	8;8;1	8;8;1	8;8;1	Lysosome membrane protein 2	SCARB2	>tr|A0A024RDG6|A0A024RDG6_HUMAN Scavenger receptor class B, member 2, isoform CRA_a OS=Homo sapiens GN=SCARB2 PE=3 SV=1;>sp|Q14108|SCRB2_HUMAN Lysosome membrane protein 2 OS=Homo sapiens GN=SCARB2 PE=1 SV=2	3	8	8	8	3	3	4	4	1	1	1	1	3	3	0	0	3	3	5	5	5	5	2	3	4	5	3	3	4	4	1	1	1	1	3	3	0	0	3	3	5	5
A0A024RDG9;Q9BUT1;A8K5M0;A0A024RDJ8;D6RBF6;D6RFG2;D6R9P2;D6R9U8;D6RIR6;B3KY19	A0A024RDG9;Q9BUT1;A8K5M0;A0A024RDJ8	3;3;2;2;1;1;1;1;1;1	3;3;2;2;1;1;1;1;1;1	3;3;2;2;1;1;1;1;1;1	3-hydroxybutyrate dehydrogenase type 2	BDH2	>tr|A0A024RDG9|A0A024RDG9_HUMAN 3-hydroxybutyrate dehydrogenase, type 2, isoform CRA_b OS=Homo sapiens GN=BDH2 PE=4 SV=1;>sp|Q9BUT1|BDH2_HUMAN 3-hydroxybutyrate dehydrogenase type 2 OS=Homo sapiens GN=BDH2 PE=1 SV=2;>tr|A8K5M0|A8K5M0_HUMAN cDNA FLJ78346, h	10	3	3	3	1	0	1	1	0	1	0	0	3	3	2	1	3	3	1	1	0	0	0	1	2	2	1	0	1	1	0	1	0	0	3	3	2	1	3	3	1	1
D6RFM0;D6RAH7;H9KV45;A0A0A0MQU3;A0A024RDH2;A0A087WY85;P62837;P61077;D6RAW0;D6RA11;D6RIZ3	D6RFM0;D6RAH7;H9KV45;A0A0A0MQU3;A0A024RDH2;A0A087WY85;P62837;P61077;D6RAW0;D6RA11	4;4;4;4;4;4;4;4;3;2;1	4;4;4;4;4;4;4;4;3;2;1	3;3;3;3;3;3;3;3;2;1;1	Ubiquitin-conjugating enzyme E2 D2;Ubiquitin-conjugating enzyme E2 D3	UBE2D2;UBE2D3	>tr|D6RFM0|D6RFM0_HUMAN Ubiquitin-conjugating enzyme E2 D2 (Fragment) OS=Homo sapiens GN=UBE2D2 PE=3 SV=1;>tr|D6RAH7|D6RAH7_HUMAN Ubiquitin-conjugating enzyme E2 D3 OS=Homo sapiens GN=UBE2D3 PE=1 SV=1;>tr|H9KV45|H9KV45_HUMAN Ubiquitin-conjugating enzyme E2	11	4	4	3	1	1	1	1	4	4	1	1	1	1	1	1	1	1	1	1	1	1	1	1	1	1	1	1	1	1	4	4	1	1	1	1	1	1	1	1	1	1
A0A024RDH8;P49207;Q5MK14	A0A024RDH8;P49207	4;4;1	4;4;1	4;4;1	60S ribosomal protein L34	RPL34	>tr|A0A024RDH8|A0A024RDH8_HUMAN Ribosomal protein L34, isoform CRA_a OS=Homo sapiens GN=RPL34 PE=4 SV=1;>sp|P49207|RL34_HUMAN 60S ribosomal protein L34 OS=Homo sapiens GN=RPL34 PE=1 SV=3	3	4	4	4	2	2	1	1	1	1	0	0	2	3	0	0	2	1	1	1	0	0	0	0	1	1	2	2	1	1	1	1	0	0	2	3	0	0	2	1	1	1
A0A024RDI0;Q8IZQ1	A0A024RDI0;Q8IZQ1	3;3	3;3	3;3	WD repeat and FYVE domain-containing protein 3	WDFY3	>tr|A0A024RDI0|A0A024RDI0_HUMAN WD repeat and FYVE domain containing 3, isoform CRA_a OS=Homo sapiens GN=WDFY3 PE=4 SV=1;>sp|Q8IZQ1|WDFY3_HUMAN WD repeat and FYVE domain-containing protein 3 OS=Homo sapiens GN=WDFY3 PE=1 SV=2	2	3	3	3	0	0	1	1	0	0	0	0	0	0	0	0	0	0	2	1	0	0	0	0	0	1	0	0	1	1	0	0	0	0	0	0	0	0	0	0	2	1
D6RHZ6;F5HB16;V9HW50;A0A024RDI5;P00325;B7ZB36;B4E1R1;B4E2R9;P07327	D6RHZ6;F5HB16;V9HW50;A0A024RDI5;P00325;B7ZB36;B4E1R1;B4E2R9;P07327	2;2;2;2;2;1;1;1;1	2;2;2;2;2;1;1;1;1	2;2;2;2;2;1;1;1;1	Alcohol dehydrogenase 1B;Alcohol dehydrogenase 1A	ADH1B;HEL-S-117;ADH1A	>tr|D6RHZ6|D6RHZ6_HUMAN Alcohol dehydrogenase 1B OS=Homo sapiens GN=ADH1B PE=1 SV=2;>tr|F5HB16|F5HB16_HUMAN cDNA FLJ51682, highly similar to Alcohol dehydrogenase 1B (EC 1.1.1.1) OS=Homo sapiens PE=2 SV=1;>tr|V9HW50|V9HW50_HUMAN Epididymis secretory protei	9	2	2	2	0	0	1	2	0	0	0	0	0	0	0	0	0	0	0	0	0	0	0	0	0	0	0	0	1	2	0	0	0	0	0	0	0	0	0	0	0	0
Q8NG26;Q96KB3;A0A024RDI6;Q9BW91;H7C386;D6RAW2	Q8NG26;Q96KB3;A0A024RDI6;Q9BW91;H7C386	5;5;5;5;3;2	5;5;5;5;3;2	5;5;5;5;3;2	ADP-ribose pyrophosphatase, mitochondrial	NUDT9	>tr|Q8NG26|Q8NG26_HUMAN Putative nudix hydrolyase OS=Homo sapiens PE=2 SV=1;>tr|Q96KB3|Q96KB3_HUMAN cDNA FLJ14389 fis, clone HEMBA1002876 OS=Homo sapiens PE=2 SV=1;>tr|A0A024RDI6|A0A024RDI6_HUMAN Nudix (Nucleoside diphosphate linked moiety X)-type motif 9,	6	5	5	5	1	0	3	3	1	1	0	0	2	2	1	1	4	4	2	2	2	2	2	2	2	2	1	0	3	3	1	1	0	0	2	2	1	1	4	4	2	2
D6R938;A0A024RDK3;E9PBG7;E9PF82;Q13557;B7Z2B0;Q4G1A8;H0Y9J2;H0Y9C2;Q92991;H7BXS4;Q8IWE0;Q7LDD5;A8K161;Q9UQM7;B7Z1Z6;E9PBE8;E7EQE4;B3KTH7;D6RFJ0;Q75LA8;E7ERS6;E7ETC9;H7BZC6;D6RHX9	D6R938;A0A024RDK3;E9PBG7;E9PF82;Q13557;B7Z2B0;Q4G1A8	18;18;18;18;18;17;11;8;8;5;5;5;5;5;5;4;3;3;3;2;2;2;2;2;1	18;18;18;18;18;17;11;8;8;5;5;5;5;5;5;4;3;3;3;2;2;2;2;2;1	12;12;12;12;12;11;5;7;5;4;0;0;0;0;0;0;0;0;0;0;0;0;0;0;0	Calcium/calmodulin-dependent protein kinase type II subunit delta	CAMK2D	>tr|D6R938|D6R938_HUMAN Calcium/calmodulin-dependent protein kinase (CaM kinase) II delta, isoform CRA_e OS=Homo sapiens GN=CAMK2D PE=1 SV=1;>tr|A0A024RDK3|A0A024RDK3_HUMAN Calcium/calmodulin-dependent protein kinase (CaM kinase) II delta, isoform CRA_a OS	25	18	18	12	7	7	6	6	8	8	4	4	5	5	0	1	7	7	4	4	4	4	8	8	7	5	7	7	6	6	8	8	4	4	5	5	0	1	7	7	4	4
Q59ET3;A0A024RDL1;P40227;B4DPJ8;B2R9K8;A1JUI8;B4DN39	Q59ET3;A0A024RDL1;P40227;B4DPJ8;B2R9K8;A1JUI8;B4DN39	28;28;28;27;27;25;20	28;28;28;27;27;25;20	21;21;21;21;20;19;16	T-complex protein 1 subunit zeta	CCT6A	>tr|Q59ET3|Q59ET3_HUMAN Chaperonin containing TCP1, subunit 6A isoform a variant (Fragment) OS=Homo sapiens PE=2 SV=1;>tr|A0A024RDL1|A0A024RDL1_HUMAN Chaperonin containing TCP1, subunit 6A (Zeta 1), isoform CRA_a OS=Homo sapiens GN=CCT6A PE=3 SV=1;>sp|P402	7	28	28	21	10	11	12	13	19	18	11	11	13	14	9	8	19	18	10	9	11	13	11	12	13	12	10	11	12	13	19	18	11	11	13	14	9	8	19	18	10	9
C9JBI3;Q53EY1;A0A024RDL3;P78330;A0A024RDL9;A0A1D5RMN5;C9JEJ7;F8WD74	C9JBI3;Q53EY1;A0A024RDL3;P78330;A0A024RDL9	3;3;3;3;2;1;1;1	3;3;3;3;2;1;1;1	3;3;3;3;2;1;1;1	Phosphoserine phosphatase	PSPH	>tr|C9JBI3|C9JBI3_HUMAN Phosphoserine phosphatase (Fragment) OS=Homo sapiens GN=PSPH PE=1 SV=1;>tr|Q53EY1|Q53EY1_HUMAN Phosphoserine phosphatase variant (Fragment) OS=Homo sapiens PE=2 SV=1;>tr|A0A024RDL3|A0A024RDL3_HUMAN Phosphoserine phosphatase, isoform	8	3	3	3	0	0	2	2	0	0	1	0	0	0	0	0	1	1	0	1	0	0	0	0	2	1	0	0	2	2	0	0	1	0	0	0	0	0	1	1	0	1
A8K3R3;A0A024RDL6;E9PFK9;Q9UJ41;A0A0A0MSJ3;B3KMF1;Q3HKR1	A8K3R3;A0A024RDL6;E9PFK9;Q9UJ41;A0A0A0MSJ3;B3KMF1;Q3HKR1	3;3;3;3;2;2;2	3;3;3;3;2;2;2	3;3;3;3;2;2;2	Rab5 GDP/GTP exchange factor	RABGEF1	>tr|A8K3R3|A8K3R3_HUMAN cDNA FLJ75284, highly similar to Homo sapiens RAB guanine nucleotide exchange factor (GEF) 1 (RABGEF1), mRNA OS=Homo sapiens PE=2 SV=1;>tr|A0A024RDL6|A0A024RDL6_HUMAN RAB guanine nucleotide exchange factor (GEF) 1, isoform CRA_b OS=	7	3	3	3	0	0	0	0	1	1	0	0	0	0	0	0	1	1	0	1	0	0	1	1	0	1	0	0	0	0	1	1	0	0	0	0	0	0	1	1	0	1
A0A024RDL8;P04424;A0A0S2Z3B0;A0A0S2Z316;B4DU69;F8W943;Q6XYD2;H7C0S8	A0A024RDL8;P04424;A0A0S2Z3B0;A0A0S2Z316;B4DU69;F8W943	12;12;11;11;7;7;4;4	12;12;11;11;7;7;4;4	12;12;11;11;7;7;4;4	Argininosuccinate lyase	ASL	>tr|A0A024RDL8|A0A024RDL8_HUMAN Argininosuccinate lyase isoform 1 OS=Homo sapiens GN=ASL PE=2 SV=1;>sp|P04424|ARLY_HUMAN Argininosuccinate lyase OS=Homo sapiens GN=ASL PE=1 SV=4;>tr|A0A0S2Z3B0|A0A0S2Z3B0_HUMAN Argininosuccinate lyase isoform 3 (Fragment) O	8	12	12	12	0	1	4	4	5	5	0	0	1	1	0	0	5	6	3	3	3	2	5	5	7	7	0	1	4	4	5	5	0	0	1	1	0	0	5	6	3	3
A0A024RDM2;V9HWG2;Q9Y2S2;A0A087WW38;B4DWM9	A0A024RDM2;V9HWG2;Q9Y2S2	15;15;15;7;5	15;15;15;7;5	15;15;15;7;5	Lambda-crystallin homolog	CRYL1;HEL30	>tr|A0A024RDM2|A0A024RDM2_HUMAN Crystallin, lambda 1, isoform CRA_a OS=Homo sapiens GN=CRYL1 PE=4 SV=1;>tr|V9HWG2|V9HWG2_HUMAN Epididymis luminal protein 30 OS=Homo sapiens GN=HEL30 PE=2 SV=1;>sp|Q9Y2S2|CRYL1_HUMAN Lambda-crystallin homolog OS=Homo sapiens	5	15	15	15	11	10	9	9	11	11	1	2	10	10	1	1	12	13	5	5	10	12	9	9	10	10	11	10	9	9	11	11	1	2	10	10	1	1	12	13	5	5
A0A024RDP0;O95164	A0A024RDP0;O95164	4;4	4;4	4;4	Ubiquitin-like protein 3	UBL3	>tr|A0A024RDP0|A0A024RDP0_HUMAN Ubiquitin-like 3, isoform CRA_a OS=Homo sapiens GN=UBL3 PE=4 SV=1;>sp|O95164|UBL3_HUMAN Ubiquitin-like protein 3 OS=Homo sapiens GN=UBL3 PE=1 SV=1	2	4	4	4	0	0	0	0	2	3	0	0	0	0	0	0	1	0	0	0	0	0	1	1	0	0	0	0	0	0	2	3	0	0	0	0	0	0	1	0	0	0
A0A024RDQ0;A0A024RDS1;Q92598;B4DF68;A0A0A0MSM0;B4DZB4;B4DY72;R4GN69;B4DZP3;Q5TBM3	A0A024RDQ0;A0A024RDS1;Q92598;B4DF68;A0A0A0MSM0;B4DZB4;B4DY72	24;24;24;19;18;15;15;5;2;2	20;20;20;15;14;12;11;5;2;2	20;20;20;15;14;12;11;5;2;2	Heat shock protein 105 kDa	HSPH1	>tr|A0A024RDQ0|A0A024RDQ0_HUMAN Heat shock 105kDa/110kDa protein 1, isoform CRA_a OS=Homo sapiens GN=HSPH1 PE=3 SV=1;>tr|A0A024RDS1|A0A024RDS1_HUMAN Heat shock 105kDa/110kDa protein 1, isoform CRA_c OS=Homo sapiens GN=HSPH1 PE=3 SV=1;>sp|Q92598|HS105_HUMAN	10	24	20	20	5	5	7	8	15	14	5	5	11	12	2	3	9	9	7	8	6	7	8	7	10	11	4	4	7	8	11	10	5	5	8	9	2	2	7	7	5	6
A0A024RDT3;Q9H9S4;Q5TAW7;B7ZBJ4;B7ZBJ5;B7ZBJ6;B7ZBJ7	A0A024RDT3;Q9H9S4;Q5TAW7;B7ZBJ4;B7ZBJ5	16;16;15;10;8;4;2	13;13;12;7;7;4;2	13;13;12;7;7;4;2	Calcium-binding protein 39-like	CAB39L	>tr|A0A024RDT3|A0A024RDT3_HUMAN Calcium binding protein 39-like, isoform CRA_a OS=Homo sapiens GN=CAB39L PE=4 SV=1;>sp|Q9H9S4|CB39L_HUMAN Calcium-binding protein 39-like OS=Homo sapiens GN=CAB39L PE=1 SV=3;>tr|Q5TAW7|Q5TAW7_HUMAN Calcium-binding protein 39	7	16	13	13	7	7	8	9	10	11	5	5	9	8	0	1	12	12	7	6	6	7	8	9	9	9	4	4	5	6	7	8	4	4	6	5	0	0	9	9	6	5
Q8IYQ9;A0A024RDV7;O00505;Q53F09;H0Y4S9	Q8IYQ9;A0A024RDV7;O00505;Q53F09	6;6;6;5;1	2;2;2;2;1	2;2;2;2;1	Importin subunit alpha;Importin subunit alpha-4	KPNA3	>tr|Q8IYQ9|Q8IYQ9_HUMAN Importin subunit alpha OS=Homo sapiens GN=KPNA3 PE=2 SV=1;>tr|A0A024RDV7|A0A024RDV7_HUMAN Importin subunit alpha OS=Homo sapiens GN=KPNA3 PE=3 SV=1;>sp|O00505|IMA4_HUMAN Importin subunit alpha-4 OS=Homo sapiens GN=KPNA3 PE=1 SV=2;>t	5	6	2	2	0	0	0	0	2	2	1	1	2	2	0	0	2	2	0	0	0	0	0	0	2	2	0	0	0	0	2	2	0	0	1	1	0	0	0	0	0	0
A8K3Y6;A0A024RDV8;Q15714;A0A087X0H8	A8K3Y6;A0A024RDV8;Q15714;A0A087X0H8	2;2;2;1	1;1;1;1	1;1;1;1	TSC22 domain family protein 1	TSC22D1	>tr|A8K3Y6|A8K3Y6_HUMAN cDNA FLJ78231, highly similar to Homo sapiens TSC22 domain family, member 1 (TSC22D1), transcript variant 2, mRNA OS=Homo sapiens PE=2 SV=1;>tr|A0A024RDV8|A0A024RDV8_HUMAN TSC22 domain family, member 1, isoform CRA_a OS=Homo sapiens	4	2	1	1	0	0	0	0	1	1	0	0	0	0	0	0	2	2	1	1	1	1	0	0	1	1	0	0	0	0	1	1	0	0	0	0	0	0	1	1	0	0
B4DXT5;B3KML8;A8K6Q9;A0A024RDV9;Q8N0X7	B4DXT5;B3KML8;A8K6Q9;A0A024RDV9;Q8N0X7	2;2;2;2;2	2;2;2;2;2	2;2;2;2;2	Spartin	SPG20	>tr|B4DXT5|B4DXT5_HUMAN cDNA FLJ53483, highly similar to Spartin OS=Homo sapiens PE=2 SV=1;>tr|B3KML8|B3KML8_HUMAN cDNA FLJ11345 fis, clone PLACE1010877, highly similar to Spartin OS=Homo sapiens PE=2 SV=1;>tr|A8K6Q9|A8K6Q9_HUMAN cDNA FLJ75882, highly simi	5	2	2	2	0	0	0	0	0	0	2	2	0	0	0	0	0	0	0	0	0	0	0	0	0	0	0	0	0	0	0	0	2	2	0	0	0	0	0	0	0	0
A0A024RDW8;P08572;B4DH43;A2A352	A0A024RDW8;P08572;B4DH43	3;3;2;1	3;3;2;1	3;3;2;1	Collagen alpha-2(IV) chain;Canstatin	COL4A2	>tr|A0A024RDW8|A0A024RDW8_HUMAN Collagen, type IV, alpha 2, isoform CRA_a OS=Homo sapiens GN=COL4A2 PE=4 SV=1;>sp|P08572|CO4A2_HUMAN Collagen alpha-2(IV) chain OS=Homo sapiens GN=COL4A2 PE=1 SV=4;>tr|B4DH43|B4DH43_HUMAN cDNA FLJ56433, highly similar to Col	4	3	3	3	3	3	1	1	0	0	0	0	0	0	0	0	0	0	0	0	0	0	0	0	0	0	3	3	1	1	0	0	0	0	0	0	0	0	0	0	0	0
B4DKX7;A0A024RDX4;Q8IW45;B3KSJ9;B7Z3Q0;B4DQR1;O95333	B4DKX7;A0A024RDX4;Q8IW45;B3KSJ9	6;6;6;5;2;2;1	6;6;6;5;2;2;1	6;6;6;5;2;2;1	ATP-dependent (S)-NAD(P)H-hydrate dehydratase	CARKD;FLJ10769	>tr|B4DKX7|B4DKX7_HUMAN ATP-dependent (S)-NAD(P)H-hydrate dehydratase OS=Homo sapiens GN=CARKD PE=2 SV=1;>tr|A0A024RDX4|A0A024RDX4_HUMAN ATP-dependent (S)-NAD(P)H-hydrate dehydratase OS=Homo sapiens GN=FLJ10769 PE=3 SV=1;>sp|Q8IW45|NNRD_HUMAN ATP-dependent	7	6	6	6	1	1	2	2	3	2	2	2	2	2	1	1	3	3	1	1	1	1	2	2	2	3	1	1	2	2	3	2	2	2	2	2	1	1	3	3	1	1
A0A024RDY0;O00410;H0Y8C6;B4E0R6;B3KWG6;E7ETV3;E7EQT5;H0Y3V4;C9JZD8;C9JMV5;E7EV12;C9JQT6;E7ESA1;E7ESZ1;E7EWK4;E7EX05;E7ETV8;Q9BVS9;C9J875;C9JZ53;C9JXE0;B4E340	A0A024RDY0;O00410;H0Y8C6;B4E0R6;B3KWG6	42;42;39;35;22;9;7;7;6;6;5;4;4;4;4;4;4;3;2;2;1;1	42;42;39;35;22;9;7;7;6;6;5;4;4;4;4;4;4;3;2;2;1;1	39;39;36;32;19;9;7;7;6;6;5;4;4;4;4;4;4;2;2;2;1;0	Importin-5	RANBP5;IPO5	>tr|A0A024RDY0|A0A024RDY0_HUMAN RAN binding protein 5, isoform CRA_d OS=Homo sapiens GN=RANBP5 PE=4 SV=1;>sp|O00410|IPO5_HUMAN Importin-5 OS=Homo sapiens GN=IPO5 PE=1 SV=4;>tr|H0Y8C6|H0Y8C6_HUMAN Importin-5 (Fragment) OS=Homo sapiens GN=IPO5 PE=1 SV=1;>tr|	22	42	42	39	7	7	5	6	40	42	4	4	9	11	7	8	18	18	1	1	6	7	5	5	7	8	7	7	5	6	40	42	4	4	9	11	7	8	18	18	1	1
B3KRY3;A0A024RDY3;P11279;Q59FZ0	B3KRY3;A0A024RDY3;P11279	10;10;10;2	10;10;10;2	10;10;10;2	Lysosome-associated membrane glycoprotein 1	LAMP1	>tr|B3KRY3|B3KRY3_HUMAN cDNA FLJ35079 fis, clone PLACE6005283, highly similar to Lysosome-associated membrane glycoprotein 1 OS=Homo sapiens PE=2 SV=1;>tr|A0A024RDY3|A0A024RDY3_HUMAN Lysosomal-associated membrane protein 1, isoform CRA_a OS=Homo sapiens GN	4	10	10	10	6	6	6	6	5	6	6	5	5	5	4	4	8	8	5	5	5	5	7	7	6	6	6	6	6	6	5	6	6	5	5	5	4	4	8	8	5	5
A0A024RDY9;B1ALK7;B7Z6G2;E9PDQ5;B7Z344;Q14155;E7EUY6;Q5W9H1;B7Z6D9;F6SJA5;Q8N4Q3	A0A024RDY9;B1ALK7;B7Z6G2;E9PDQ5;B7Z344;Q14155;E7EUY6;Q5W9H1	7;7;7;6;6;6;5;5;2;1;1	7;7;7;6;6;6;5;5;2;1;1	6;6;6;6;6;6;5;5;2;1;0	Rho guanine nucleotide exchange factor 7	ARHGEF7;KIAA0142	>tr|A0A024RDY9|A0A024RDY9_HUMAN Rho guanine nucleotide exchange factor (GEF) 7, isoform CRA_b OS=Homo sapiens GN=ARHGEF7 PE=4 SV=1;>tr|B1ALK7|B1ALK7_HUMAN Rho guanine nucleotide exchange factor 7 OS=Homo sapiens GN=ARHGEF7 PE=1 SV=1;>tr|B7Z6G2|B7Z6G2_HUMAN	11	7	7	6	0	0	0	0	1	1	2	2	1	1	0	0	2	2	0	0	0	0	0	0	2	0	0	0	0	0	1	1	2	2	1	1	0	0	2	2	0	0
B2R879;A0A024RE18;Q8N271;F8WDW5	B2R879;A0A024RE18;Q8N271	18;18;18;3	18;18;18;3	18;18;18;3	Prominin-2	PROM2	>tr|B2R879|B2R879_HUMAN cDNA, FLJ93777, highly similar to Homo sapiens prominin 2 (PROM2), mRNA OS=Homo sapiens PE=2 SV=1;>tr|A0A024RE18|A0A024RE18_HUMAN Prominin 2, isoform CRA_a OS=Homo sapiens GN=PROM2 PE=4 SV=1;>sp|Q8N271|PROM2_HUMAN Prominin-2 OS=Homo	4	18	18	18	9	8	13	12	14	15	4	4	6	6	10	11	15	14	5	4	11	10	7	8	3	5	9	8	13	12	14	15	4	4	6	6	10	11	15	14	5	4
B7Z731;A0A0G2JNZ5;A0A0G2JNZ0;B7Z7G9;B7Z6E6;B2R6A7;A0A0G2JLB3;A0A068F658;B7Z6S9;P04062;D3DV87;A0A068F4C8;A0A068FB60	B7Z731;A0A0G2JNZ5;A0A0G2JNZ0;B7Z7G9;B7Z6E6;B2R6A7;A0A0G2JLB3;A0A068F658;B7Z6S9;P04062;D3DV87;A0A068F4C8;A0A068FB60	12;12;12;12;12;12;12;12;12;12;11;8;7	12;12;12;12;12;12;12;12;12;12;11;8;7	2;2;2;2;2;2;2;2;2;2;2;1;2	Glucosylceramidase	GBA	>tr|B7Z731|B7Z731_HUMAN Glucosylceramidase OS=Homo sapiens PE=2 SV=1;>tr|A0A0G2JNZ5|A0A0G2JNZ5_HUMAN Glucosylceramidase OS=Homo sapiens GN=GBA PE=1 SV=1;>tr|A0A0G2JNZ0|A0A0G2JNZ0_HUMAN Glucosylceramidase OS=Homo sapiens GN=GBA PE=1 SV=1;>tr|B7Z7G9|B7Z7G9_H	13	12	12	2	5	6	8	10	5	5	1	1	5	5	1	0	5	5	0	0	4	4	4	4	5	3	5	6	8	10	5	5	1	1	5	5	1	0	5	5	0	0
A0A068LKP9;A0A120HG46;A0A0F7TAT3;A0A0F7T737;A2NB44;A0A125U0U3;Q7Z3Y6;A0A0J9YWU9;A0A068LKS1;A0A0C4DH41;A0A068LL62;Q9UL73;A0N5G4;A0A068LRW4;A0A068LKQ4;A0A068LL56;A0A068LKQ5;A0A125U0V2;A0A0X9TD88;Q86SX2;O95973;P01825;P06331;P01824	A0A068LKP9;A0A120HG46;A0A0F7TAT3;A0A0F7T737;A2NB44;A0A125U0U3;Q7Z3Y6;A0A0J9YWU9;A0A068LKS1;A0A0C4DH41;A0A068LL62;Q9UL73;A0N5G4;A0A068LRW4;A0A068LKQ4;A0A068LL56;A0A068LKQ5;A0A125U0V2;A0A0X9TD88;Q86SX2;O95973;P01825;P06331;P01824	2;2;1;1;1;1;1;1;1;1;1;1;1;1;1;1;1;1;1;1;1;1;1;1	2;2;1;1;1;1;1;1;1;1;1;1;1;1;1;1;1;1;1;1;1;1;1;1	1;1;1;1;1;0;1;1;1;1;1;0;1;0;1;1;0;0;0;1;1;1;1;1	Ig heavy chain V-II region NEWM;Ig heavy chain V-II region ARH-77;Ig heavy chain V-II region WAH	IGH@;VH4-34;VH4;IGM	>tr|A0A068LKP9|A0A068LKP9_HUMAN Ig heavy chain variable region (Fragment) OS=Homo sapiens PE=2 SV=1;>tr|A0A120HG46|A0A120HG46_HUMAN GCT-A10 heavy chain variable region (Fragment) OS=Homo sapiens PE=2 SV=1;>tr|A0A0F7TAT3|A0A0F7TAT3_HUMAN IGHV4-39 protein (F	24	2	2	1	0	0	2	2	1	1	1	1	0	0	1	1	0	0	0	0	0	0	0	0	1	1	0	0	2	2	1	1	1	1	0	0	1	1	0	0	0	0
A0A075B6N8;Q8NF17;Q6N030;Q5EBM2;P01860;Q86TT2	A0A075B6N8;Q8NF17;Q6N030;Q5EBM2;P01860;Q86TT2	11;11;11;11;11;9	6;6;6;6;6;5	3;3;3;3;3;3	Ig gamma-3 chain C region	IGHG3;FLJ00385;DKFZp686I15212	>tr|A0A075B6N8|A0A075B6N8_HUMAN Ig gamma-3 chain C region (Fragment) OS=Homo sapiens GN=IGHG3 PE=1 SV=1;>tr|Q8NF17|Q8NF17_HUMAN FLJ00385 protein (Fragment) OS=Homo sapiens GN=FLJ00385 PE=1 SV=1;>tr|Q6N030|Q6N030_HUMAN Uncharacterized protein OS=Homo sapien	6	11	6	3	7	7	5	4	6	6	6	5	6	6	7	6	8	8	4	4	6	6	5	5	5	5	2	2	3	2	3	3	3	2	2	3	3	2	5	5	2	2
A0A087WYJ9;A0A075B6N9;A0A1B0GUU9;P01871;Q86TT1;P04220	A0A087WYJ9;A0A075B6N9;A0A1B0GUU9;P01871;Q86TT1;P04220	16;16;16;16;13;10	16;16;16;16;13;10	16;16;16;16;13;10	Ig mu chain C region;Ig mu heavy chain disease protein	IGHM	>tr|A0A087WYJ9|A0A087WYJ9_HUMAN Ig mu chain C region OS=Homo sapiens GN=IGHM PE=1 SV=2;>tr|A0A075B6N9|A0A075B6N9_HUMAN Ig mu chain C region (Fragment) OS=Homo sapiens GN=IGHM PE=1 SV=2;>tr|A0A1B0GUU9|A0A1B0GUU9_HUMAN Ig mu chain C region (Fragment) OS=Homo	6	16	16	16	4	3	10	10	8	7	3	3	7	4	7	8	0	0	0	0	3	2	0	0	3	2	4	3	10	10	8	7	3	3	7	4	7	8	0	0	0	0
H0YN73;H0YN88;A0A075B716;P08708;H3BNC9	H0YN73;H0YN88;A0A075B716;P08708;H3BNC9	2;2;2;2;1	2;2;2;2;1	2;2;2;2;1	40S ribosomal protein S17	RPS17	>tr|H0YN73|H0YN73_HUMAN 40S ribosomal protein S17 (Fragment) OS=Homo sapiens GN=RPS17 PE=1 SV=1;>tr|H0YN88|H0YN88_HUMAN 40S ribosomal protein S17 OS=Homo sapiens GN=RPS17 PE=1 SV=1;>tr|A0A075B716|A0A075B716_HUMAN 40S ribosomal protein S17 OS=Homo sapiens G	5	2	2	2	0	0	0	0	1	1	0	0	1	1	0	0	1	1	0	0	0	0	0	0	0	0	0	0	0	0	1	1	0	0	1	1	0	0	1	1	0	0
A0A075B730;A0A087X1U6;P58107;D3DWL0	A0A075B730;A0A087X1U6;P58107	4;4;4;1	4;4;4;1	3;3;3;0	Epiplakin	EPPK1	>tr|A0A075B730|A0A075B730_HUMAN Epiplakin OS=Homo sapiens GN=EPPK1 PE=1 SV=2;>tr|A0A087X1U6|A0A087X1U6_HUMAN Epiplakin OS=Homo sapiens GN=EPPK1 PE=1 SV=1;>sp|P58107|EPIPL_HUMAN Epiplakin OS=Homo sapiens GN=EPPK1 PE=1 SV=2	4	4	4	3	1	0	0	0	0	0	2	2	1	0	0	0	0	0	0	0	0	0	0	0	0	0	1	0	0	0	0	0	2	2	1	0	0	0	0	0	0	0
A0A075B785;Q9P260	A0A075B785;Q9P260	2;2	1;1	1;1	LisH domain and HEAT repeat-containing protein KIAA1468	KIAA1468	>tr|A0A075B785|A0A075B785_HUMAN LisH domain and HEAT repeat-containing protein KIAA1468 OS=Homo sapiens GN=KIAA1468 PE=1 SV=7;>sp|Q9P260|K1468_HUMAN LisH domain and HEAT repeat-containing protein KIAA1468 OS=Homo sapiens GN=KIAA1468 PE=1 SV=2	2	2	1	1	0	0	0	0	1	0	0	0	0	0	0	0	1	0	0	0	0	0	0	0	0	0	0	0	0	0	0	0	0	0	0	0	0	0	1	0	0	0
A0A075B7A0	A0A075B7A0	6	1	1		RPL18	>tr|A0A075B7A0|A0A075B7A0_HUMAN 60S ribosomal protein L18 OS=Homo sapiens GN=RPL18 PE=1 SV=1	1	6	1	1	1	1	2	2	4	4	0	0	1	1	0	0	3	3	0	0	1	2	3	3	0	0	0	0	1	1	1	1	0	0	0	0	0	0	0	0	0	0
A0A080YUZ5;Q96KX0	A0A080YUZ5;Q96KX0	2;2	2;2	2;2	Lysozyme-like protein 4	LYZL4	>tr|A0A080YUZ5|A0A080YUZ5_HUMAN Lysozyme A OS=Homo sapiens GN=LYZA PE=3 SV=1;>sp|Q96KX0|LYZL4_HUMAN Lysozyme-like protein 4 OS=Homo sapiens GN=LYZL4 PE=2 SV=1	2	2	2	2	0	0	0	0	2	2	0	0	0	0	0	0	1	1	0	0	0	0	0	0	0	0	0	0	0	0	2	2	0	0	0	0	0	0	1	1	0	0
A0A080YUZ7;B4DYD1;Q8IXA5;E9PF91;Q05C28	A0A080YUZ7;B4DYD1;Q8IXA5;E9PF91;Q05C28	5;5;5;4;4	5;5;5;4;4	5;5;5;4;4	Sperm acrosome membrane-associated protein 3;Sperm acrosome membrane-associated protein 3, membrane form;Sperm acrosome membrane-associated protein 3, processed form	SPACA3	>tr|A0A080YUZ7|A0A080YUZ7_HUMAN Lysozyme C OS=Homo sapiens GN=LYZC PE=3 SV=1;>tr|B4DYD1|B4DYD1_HUMAN cDNA FLJ57231, moderately similar to Homo sapiens polyhomeotic like 3 (PHC3), mRNA OS=Homo sapiens PE=2 SV=1;>sp|Q8IXA5|SACA3_HUMAN Sperm acrosome membrane	5	5	5	5	1	1	0	0	1	3	0	0	0	0	0	0	0	0	1	1	0	0	0	0	0	0	1	1	0	0	1	3	0	0	0	0	0	0	0	0	1	1
V9HW75;A0A087WSV8;P80303;Q2L696;E9PKG6;H0YEG8;E9PLR0;E9PLE9;H0YD18;E9PM22;E9PJP3;A7LNF5;A0A097EV82;A7LNF4;A7LNF3	V9HW75;A0A087WSV8;P80303;Q2L696;E9PKG6	31;31;29;26;21;15;11;11;6;4;3;3;3;1;1	31;31;29;26;21;15;11;11;6;4;3;3;3;1;1	31;31;29;26;21;15;11;11;6;4;3;3;3;1;1	Nucleobindin-2;Nesfatin-1	HEL-S-109;NUCB2;Nucb2;DCAF5	>tr|V9HW75|V9HW75_HUMAN Epididymis secretory protein Li 109 OS=Homo sapiens GN=HEL-S-109 PE=1 SV=1;>tr|A0A087WSV8|A0A087WSV8_HUMAN Nucleobindin 2, isoform CRA_b OS=Homo sapiens GN=NUCB2 PE=1 SV=1;>sp|P80303|NUCB2_HUMAN Nucleobindin-2 OS=Homo sapiens GN=NUC	15	31	31	31	21	20	21	21	19	19	20	20	23	23	22	22	22	20	19	19	25	26	19	19	18	21	21	20	21	21	19	19	20	20	23	23	22	22	22	20	19	19
A0A087WSZ7;A0A1B0GW84;A0A140VJR0;Q08499;D6RHE0;O43862	A0A087WSZ7;A0A1B0GW84;A0A140VJR0;Q08499;D6RHE0	3;3;3;3;2;1	3;3;3;3;2;1	3;3;3;3;2;1	cAMP-specific 3,5-cyclic phosphodiesterase 4D	PDE4D;DPYSL3	>tr|A0A087WSZ7|A0A087WSZ7_HUMAN Phosphodiesterase OS=Homo sapiens GN=PDE4D PE=1 SV=1;>tr|A0A1B0GW84|A0A1B0GW84_HUMAN Phosphodiesterase OS=Homo sapiens GN=PDE4D PE=1 SV=1;>tr|A0A140VJR0|A0A140VJR0_HUMAN Phosphodiesterase OS=Homo sapiens GN=PDE4D PE=2 SV=1;>	6	3	3	3	0	0	0	0	3	3	1	0	0	0	0	0	0	0	0	1	0	0	0	0	0	0	0	0	0	0	3	3	1	0	0	0	0	0	0	0	0	1
A0A087X2I2;A0A087WT12;P36969;K7ERP4;Q6PI42;K7EJ20;K7EKX7;K7ENB4;R4GNE4;A0A0A0MTT1;Q6PJX4;A0A087X247	A0A087X2I2;A0A087WT12;P36969;K7ERP4;Q6PI42;K7EJ20;K7EKX7;K7ENB4;R4GNE4;A0A0A0MTT1	12;12;12;11;11;10;9;9;8;7;4;4	12;12;12;11;11;10;9;9;8;7;4;4	12;12;12;11;11;10;9;9;8;7;4;4	Phospholipid hydroperoxide glutathione peroxidase, mitochondrial;Glutathione peroxidase	GPX4	>tr|A0A087X2I2|A0A087X2I2_HUMAN Glutathione peroxidase OS=Homo sapiens GN=GPX4 PE=1 SV=1;>tr|A0A087WT12|A0A087WT12_HUMAN Glutathione peroxidase OS=Homo sapiens GN=GPX4 PE=1 SV=1;>sp|P36969|GPX4_HUMAN Phospholipid hydroperoxide glutathione peroxidase, mitoc	12	12	12	12	6	6	6	7	8	8	6	5	7	6	3	5	8	8	4	5	6	7	6	7	8	9	6	6	6	7	8	8	6	5	7	6	3	5	8	8	4	5
G3V4F2;B7ZMC1;E9KL42;A0A087X0W7;A0A087WT95;Q86TX2;P49753;B3KSA0;B4DV16;A1L172	G3V4F2;B7ZMC1;E9KL42;A0A087X0W7;A0A087WT95;Q86TX2;P49753;B3KSA0;B4DV16;A1L172	3;3;3;3;3;3;3;2;2;2	3;3;3;3;3;3;3;2;2;2	3;3;3;3;3;3;3;2;2;2	Acyl-coenzyme A thioesterase 1;Acyl-coenzyme A thioesterase 2, mitochondrial	ACOT1;ACOT2	>tr|G3V4F2|G3V4F2_HUMAN Acyl-coenzyme A thioesterase 1 OS=Homo sapiens GN=ACOT1 PE=1 SV=1;>tr|B7ZMC1|B7ZMC1_HUMAN Uncharacterized protein OS=Homo sapiens PE=2 SV=1;>tr|E9KL42|E9KL42_HUMAN Epididymis secretory sperm binding protein Li 188n OS=Homo sapiens P	10	3	3	3	1	1	1	1	0	0	0	0	0	0	0	0	0	0	0	0	0	0	0	0	2	2	1	1	1	1	0	0	0	0	0	0	0	0	0	0	0	0
Q9Y3W7;Q71US4;A0A087WTA5;E7ERK9;Q9UI10	Q9Y3W7;Q71US4;A0A087WTA5;E7ERK9;Q9UI10	3;3;3;3;3	3;3;3;3;3	3;3;3;3;3	Translation initiation factor eIF-2B subunit delta	DKFZp586J0119;EIF2B4	>tr|Q9Y3W7|Q9Y3W7_HUMAN Putative uncharacterized protein DKFZp586J0119 (Fragment) OS=Homo sapiens GN=DKFZp586J0119 PE=2 SV=1;>tr|Q71US4|Q71US4_HUMAN EIF-2B-delta-like protein OS=Homo sapiens PE=2 SV=1;>tr|A0A087WTA5|A0A087WTA5_HUMAN Translation initiation	5	3	3	3	0	0	0	0	1	1	0	0	0	0	0	0	3	3	0	0	0	1	1	1	1	1	0	0	0	0	1	1	0	0	0	0	0	0	3	3	0	0
Q9H049;A0A087WTD5	Q9H049;A0A087WTD5	3;3	1;1	1;1		DKFZp547A1913	>tr|Q9H049|Q9H049_HUMAN Putative uncharacterized protein DKFZp547A1913 OS=Homo sapiens GN=DKFZp547A1913 PE=2 SV=1;>tr|A0A087WTD5|A0A087WTD5_HUMAN Nodal modulator 2 OS=Homo sapiens GN=NOMO2 PE=4 SV=1	2	3	1	1	0	0	1	1	2	2	1	0	1	1	0	0	0	0	0	0	2	2	0	0	1	1	0	0	0	0	1	1	0	0	0	0	0	0	0	0	0	0
A0A087WTK0;A0A087WVC6;Q12913;Q9NPR5;E9PPH3;E9PJ83	A0A087WTK0;A0A087WVC6;Q12913	28;28;28;6;1;1	28;28;28;6;1;1	28;28;28;6;1;1	Receptor-type tyrosine-protein phosphatase eta	PTPRJ	>tr|A0A087WTK0|A0A087WTK0_HUMAN Receptor-type tyrosine-protein phosphatase eta OS=Homo sapiens GN=PTPRJ PE=1 SV=1;>tr|A0A087WVC6|A0A087WVC6_HUMAN Receptor-type tyrosine-protein phosphatase eta OS=Homo sapiens GN=PTPRJ PE=1 SV=1;>sp|Q12913|PTPRJ_HUMAN Recep	6	28	28	28	10	9	14	13	23	20	4	3	3	3	3	2	12	13	6	5	8	6	15	15	9	9	10	9	14	13	23	20	4	3	3	3	3	2	12	13	6	5
A3KFI5;E5RFZ1;A0A087WTY6;P41271;A3KFI2;A3KFI3;A3KFI4;A3KFI1	A3KFI5;E5RFZ1;A0A087WTY6;P41271;A3KFI2;A3KFI3;A3KFI4;A3KFI1	2;2;2;2;1;1;1;1	2;2;2;2;1;1;1;1	2;2;2;2;1;1;1;1	Neuroblastoma suppressor of tumorigenicity 1	NBL1	>tr|A3KFI5|A3KFI5_HUMAN Neuroblastoma suppressor of tumorigenicity 1 (Fragment) OS=Homo sapiens GN=NBL1 PE=1 SV=1;>tr|E5RFZ1|E5RFZ1_HUMAN Neuroblastoma suppressor of tumorigenicity 1 (Fragment) OS=Homo sapiens GN=NBL1 PE=1 SV=1;>tr|A0A087WTY6|A0A087WTY6_HU	8	2	2	2	2	2	1	1	1	1	1	1	2	2	0	0	2	2	1	1	2	2	0	0	2	2	2	2	1	1	1	1	1	1	2	2	0	0	2	2	1	1
Q3KRA7;Q6NSD8;A0A087WUA0;A0A0S2Z3E8;P02671;Q86Z09;A0A0S2Z3P3;Q8WW76;A0A0S2Z3M3	Q3KRA7;Q6NSD8;A0A087WUA0;A0A0S2Z3E8;P02671;Q86Z09;A0A0S2Z3P3;Q8WW76;A0A0S2Z3M3	4;4;4;4;4;2;2;2;2	4;4;4;4;4;2;2;2;2	4;4;4;4;4;2;2;2;2	Fibrinogen alpha chain;Fibrinopeptide A;Fibrinogen alpha chain	FGA	>tr|Q3KRA7|Q3KRA7_HUMAN FGA protein (Fragment) OS=Homo sapiens GN=FGA PE=2 SV=1;>tr|Q6NSD8|Q6NSD8_HUMAN FGA protein OS=Homo sapiens GN=FGA PE=2 SV=1;>tr|A0A087WUA0|A0A087WUA0_HUMAN Fibrinogen alpha chain OS=Homo sapiens GN=FGA PE=1 SV=1;>tr|A0A0S2Z3E8|A0A0	9	4	4	4	0	0	0	0	0	0	0	0	1	1	3	3	0	0	0	0	0	0	0	0	0	0	0	0	0	0	0	0	0	0	1	1	3	3	0	0	0	0
A0A087WUQ6;Q7L4Q3;P07203;Q6NSD4;X5D926	A0A087WUQ6;Q7L4Q3;P07203;Q6NSD4	10;10;10;7;1	10;10;10;7;1	10;10;10;7;1	Glutathione peroxidase;Glutathione peroxidase 1	GPX1	>tr|A0A087WUQ6|A0A087WUQ6_HUMAN Glutathione peroxidase OS=Homo sapiens GN=GPX1 PE=1 SV=1;>tr|Q7L4Q3|Q7L4Q3_HUMAN Glutathione peroxidase OS=Homo sapiens GN=GPX1 PE=2 SV=1;>sp|P07203|GPX1_HUMAN Glutathione peroxidase 1 OS=Homo sapiens GN=GPX1 PE=1 SV=4;>tr|Q	5	10	10	10	6	6	6	5	8	8	5	5	7	7	3	3	8	8	5	5	5	5	6	6	5	5	6	6	6	5	8	8	5	5	7	7	3	3	8	8	5	5
E7ETK0;A0A087WUS0;P62847	E7ETK0;A0A087WUS0;P62847	2;2;2	2;2;2	2;2;2	40S ribosomal protein S24	RPS24	>tr|E7ETK0|E7ETK0_HUMAN 40S ribosomal protein S24 OS=Homo sapiens GN=RPS24 PE=1 SV=1;>tr|A0A087WUS0|A0A087WUS0_HUMAN 40S ribosomal protein S24 OS=Homo sapiens GN=RPS24 PE=1 SV=1;>sp|P62847|RS24_HUMAN 40S ribosomal protein S24 OS=Homo sapiens GN=RPS24 PE=1	3	2	2	2	1	1	1	1	0	0	0	0	2	2	0	0	1	1	0	0	0	1	0	0	1	1	1	1	1	1	0	0	0	0	2	2	0	0	1	1	0	0
B3KM86;D3DVI5;Q8N5A0;A0A087WUT6;O60841	B3KM86;D3DVI5;Q8N5A0;A0A087WUT6;O60841	7;7;7;7;7	7;7;7;7;7	7;7;7;7;7	Eukaryotic translation initiation factor 5B	EIF5B	>tr|B3KM86|B3KM86_HUMAN cDNA FLJ10524 fis, clone NT2RP2000880, highly similar to Eukaryotic translation initiation factor 5B OS=Homo sapiens PE=2 SV=1;>tr|D3DVI5|D3DVI5_HUMAN Eukaryotic translation initiation factor 5B, isoform CRA_b OS=Homo sapiens GN=EIF	5	7	7	7	1	1	1	1	2	2	2	1	1	1	0	0	1	2	0	0	2	2	1	1	0	0	1	1	1	1	2	2	2	1	1	1	0	0	1	2	0	0
A8K4C1;A0A087WUW9;Q9NXU5;A0A0B4J222;R4GN67	A8K4C1;A0A087WUW9;Q9NXU5;A0A0B4J222	3;3;3;2;1	3;3;3;2;1	3;3;3;2;1	ADP-ribosylation factor-like protein 15	ARL15	>tr|A8K4C1|A8K4C1_HUMAN cDNA FLJ77904, highly similar to Homo sapiens ADP-ribosylation factor-like 15, mRNA OS=Homo sapiens PE=2 SV=1;>tr|A0A087WUW9|A0A087WUW9_HUMAN ADP-ribosylation factor-like protein 15 OS=Homo sapiens GN=ARL15 PE=1 SV=1;>sp|Q9NXU5|ARL1	5	3	3	3	0	0	0	0	1	1	1	1	0	0	0	0	0	1	0	1	0	0	0	0	0	1	0	0	0	0	1	1	1	1	0	0	0	0	0	1	0	1
W0UTC5;A0A087WUY8;Q14507	W0UTC5;A0A087WUY8;Q14507	8;8;8	7;7;7	7;7;7	Epididymal secretory protein E3-alpha	RAM1;EDDM3A	>tr|W0UTC5|W0UTC5_HUMAN Family with sequence similarity 12, member A OS=Homo sapiens GN=RAM1 PE=4 SV=1;>tr|A0A087WUY8|A0A087WUY8_HUMAN Epididymal secretory protein E3-alpha OS=Homo sapiens GN=EDDM3A PE=1 SV=1;>sp|Q14507|EP3A_HUMAN Epididymal secretory prot	3	8	7	7	3	3	5	5	6	6	3	2	4	4	1	1	4	4	1	1	5	5	6	6	5	5	3	3	5	5	5	5	3	2	4	4	1	1	4	4	1	1
K9MS24;B2ZZ89;A0A087WUZ3;Q01082;D6W5C0;F8W6C1;B4DIF8	K9MS24;B2ZZ89;A0A087WUZ3;Q01082;D6W5C0;F8W6C1	9;9;9;9;8;5;1	9;9;9;9;8;5;1	8;8;8;8;8;4;1	Spectrin beta chain, non-erythrocytic 1	SPTBN1	>tr|K9MS24|K9MS24_HUMAN Beta-spectrin non-erythrocytic 1 OS=Homo sapiens GN=SPTBN1 PE=2 SV=1;>tr|B2ZZ89|B2ZZ89_HUMAN Epididymis luminal protein 102 OS=Homo sapiens GN=SPTBN1 PE=2 SV=1;>tr|A0A087WUZ3|A0A087WUZ3_HUMAN Spectrin beta chain, non-erythrocytic 1	7	9	9	8	1	2	0	0	1	1	3	2	1	1	1	0	3	3	1	1	0	0	0	0	0	0	1	2	0	0	1	1	3	2	1	1	1	0	3	3	1	1
E9PFX6;Q59GE2;A0A087WV00;E7EM72;E7EWQ4;O75912	E9PFX6;Q59GE2;A0A087WV00;E7EM72;E7EWQ4;O75912	2;2;2;2;2;2	2;2;2;2;2;2	2;2;2;2;2;2	Diacylglycerol kinase;Diacylglycerol kinase iota	DGKI	>tr|E9PFX6|E9PFX6_HUMAN Diacylglycerol kinase OS=Homo sapiens GN=DGKI PE=3 SV=1;>tr|Q59GE2|Q59GE2_HUMAN Diacylglycerol kinase (Fragment) OS=Homo sapiens PE=2 SV=1;>tr|A0A087WV00|A0A087WV00_HUMAN Diacylglycerol kinase OS=Homo sapiens GN=DGKI PE=1 SV=1;>tr|E	6	2	2	2	0	0	2	1	1	1	1	0	0	0	1	0	0	0	0	0	0	0	0	1	1	1	0	0	2	1	1	1	1	0	0	0	1	0	0	0	0	0
Q6IB68;A0A087WV05;Q99417	Q6IB68;A0A087WV05;Q99417	3;3;3	3;3;3	3;3;3	C-Myc-binding protein	MYCBP	>tr|Q6IB68|Q6IB68_HUMAN MYCBP protein OS=Homo sapiens GN=MYCBP PE=2 SV=1;>tr|A0A087WV05|A0A087WV05_HUMAN Uncharacterized protein OS=Homo sapiens PE=4 SV=1;>sp|Q99417|MYCBP_HUMAN C-Myc-binding protein OS=Homo sapiens GN=MYCBP PE=1 SV=3	3	3	3	3	0	0	1	1	0	0	1	1	2	2	1	1	1	1	0	0	1	1	1	1	2	2	0	0	1	1	0	0	1	1	2	2	1	1	1	1	0	0
A0A087WV46;C9JXA7;Q0VGL1;A0A087WT92	A0A087WV46;C9JXA7;Q0VGL1;A0A087WT92	2;2;2;1	2;2;2;1	2;2;2;1	Ragulator complex protein LAMTOR4;Ragulator complex protein LAMTOR4, N-terminally processed	LAMTOR4	>tr|A0A087WV46|A0A087WV46_HUMAN Ragulator complex protein LAMTOR4 OS=Homo sapiens GN=LAMTOR4 PE=1 SV=1;>tr|C9JXA7|C9JXA7_HUMAN Ragulator complex protein LAMTOR4 OS=Homo sapiens GN=LAMTOR4 PE=1 SV=1;>sp|Q0VGL1|LTOR4_HUMAN Ragulator complex protein LAMTOR4 O	4	2	2	2	1	1	1	1	0	0	0	0	1	1	0	0	2	2	1	1	0	0	0	0	0	1	1	1	1	1	0	0	0	0	1	1	0	0	2	2	1	1
B2RC75;A0A0G2JMP8;A0A0G2JMM6;A0A087WVI4;A0A140VJX7;A0A0G2JPL6;A0A0G2JP95;A0A087WT65;Q7Z404;A0A0G2JNC6;A0A024R4Q7;C9JFU4	B2RC75;A0A0G2JMP8;A0A0G2JMM6;A0A087WVI4;A0A140VJX7;A0A0G2JPL6;A0A0G2JP95;A0A087WT65;Q7Z404	11;11;11;11;10;10;10;10;10;5;5;3	11;11;11;11;10;10;10;10;10;5;5;3	11;11;11;11;10;10;10;10;10;5;5;3	Transmembrane channel-like protein;Transmembrane channel-like protein 4	TMC4	>tr|B2RC75|B2RC75_HUMAN Transmembrane channel-like protein OS=Homo sapiens PE=2 SV=1;>tr|A0A0G2JMP8|A0A0G2JMP8_HUMAN Transmembrane channel-like protein OS=Homo sapiens GN=TMC4 PE=1 SV=1;>tr|A0A0G2JMM6|A0A0G2JMM6_HUMAN Transmembrane channel-like protein OS=	12	11	11	11	5	5	6	6	10	9	4	4	1	1	2	3	3	3	4	4	3	3	5	6	3	3	5	5	6	6	10	9	4	4	1	1	2	3	3	3	4	4
Q1T7A3;A0A087WVM2;Q8N6Q3	Q1T7A3;A0A087WVM2;Q8N6Q3	13;13;13	1;1;1	1;1;1	CD177 antigen	CD177	>tr|Q1T7A3|Q1T7A3_HUMAN CD177 OS=Homo sapiens GN=CD177 PE=2 SV=1;>tr|A0A087WVM2|A0A087WVM2_HUMAN CD177 antigen OS=Homo sapiens GN=CD177 PE=1 SV=1;>sp|Q8N6Q3|CD177_HUMAN CD177 antigen OS=Homo sapiens GN=CD177 PE=1 SV=2	3	13	1	1	9	9	10	10	10	10	3	3	7	7	3	4	8	8	4	4	5	6	9	8	0	0	1	1	1	1	1	1	1	1	1	1	1	1	1	1	0	0
A0A087WVQ6;Q00610;J3KS13;K7EJJ5;J3KRF5;J3KSQ2;J3QL20;Q9H3B0	A0A087WVQ6;Q00610	87;87;29;13;8;5;3;2	87;87;29;13;8;5;3;2	70;70;28;13;8;4;3;2	Clathrin heavy chain 1	CLTC	>tr|A0A087WVQ6|A0A087WVQ6_HUMAN Clathrin heavy chain OS=Homo sapiens GN=CLTC PE=1 SV=1;>sp|Q00610|CLH1_HUMAN Clathrin heavy chain 1 OS=Homo sapiens GN=CLTC PE=1 SV=5	8	87	87	70	36	37	47	46	64	65	29	32	50	51	24	27	50	51	34	33	38	36	40	41	42	41	36	37	47	46	64	65	29	32	50	51	24	27	50	51	34	33
B4DKJ9;A0A087WVS8;Q70IA6;B4DTJ1	B4DKJ9;A0A087WVS8;Q70IA6	3;3;3;1	3;3;3;1	3;3;3;1	MOB kinase activator 2	MOB2	>tr|B4DKJ9|B4DKJ9_HUMAN cDNA FLJ60639, highly similar to Mps one binder kinase activator-like 2 OS=Homo sapiens PE=2 SV=1;>tr|A0A087WVS8|A0A087WVS8_HUMAN MOB kinase activator 2 OS=Homo sapiens GN=MOB2 PE=1 SV=1;>sp|Q70IA6|MOB2_HUMAN MOB kinase activator 2	4	3	3	3	0	0	1	1	0	0	0	0	0	1	0	0	1	1	1	1	2	1	0	1	1	1	0	0	1	1	0	0	0	0	0	1	0	0	1	1	1	1
A0A087WVT8;A0A087X1L3;A0A087WT73;Q6ZWJ8;A0A087WXB2	A0A087WVT8;A0A087X1L3;A0A087WT73;Q6ZWJ8;A0A087WXB2	19;15;15;15;13	19;15;15;15;13	19;15;15;15;13	Kielin/chordin-like protein	KCP	>tr|A0A087WVT8|A0A087WVT8_HUMAN Kielin/chordin-like protein OS=Homo sapiens GN=KCP PE=1 SV=1;>tr|A0A087X1L3|A0A087X1L3_HUMAN Kielin/chordin-like protein OS=Homo sapiens GN=KCP PE=1 SV=1;>tr|A0A087WT73|A0A087WT73_HUMAN Kielin/chordin-like protein OS=Homo sa	5	19	19	19	8	8	11	13	8	9	0	0	3	5	5	5	5	5	1	1	0	1	5	5	2	3	8	8	11	13	8	9	0	0	3	5	5	5	5	5	1	1
F8W7S5;A1A5C5;A1A5C4;A0A087WVV2;A0A0A0MRV0;A7BI36;Q9P2E9;B3KSG1;A0A087WU26	F8W7S5;A1A5C5;A1A5C4;A0A087WVV2;A0A0A0MRV0;A7BI36;Q9P2E9;B3KSG1;A0A087WU26	3;3;3;3;3;3;3;2;2	3;3;3;3;3;3;3;2;2	3;3;3;3;3;3;3;2;2	Ribosome-binding protein 1	RRBP1	>tr|F8W7S5|F8W7S5_HUMAN Ribosome-binding protein 1 OS=Homo sapiens GN=RRBP1 PE=1 SV=1;>tr|A1A5C5|A1A5C5_HUMAN RRBP1 protein OS=Homo sapiens GN=RRBP1 PE=2 SV=1;>tr|A1A5C4|A1A5C4_HUMAN RRBP1 protein OS=Homo sapiens GN=RRBP1 PE=2 SV=1;>tr|A0A087WVV2|A0A087WVV	9	3	3	3	0	0	0	0	0	0	1	1	1	1	0	0	1	0	0	0	2	2	1	1	2	2	0	0	0	0	0	0	1	1	1	1	0	0	1	0	0	0
A0A0G2JQH3;A0A087WVZ5	A0A0G2JQH3;A0A087WVZ5	8;8	3;3	3;3			>tr|A0A0G2JQH3|A0A0G2JQH3_HUMAN Cytoplasmic FMR1-interacting protein 1 (Fragment) OS=Homo sapiens GN=CYFIP1 PE=1 SV=1;>tr|A0A087WVZ5|A0A087WVZ5_HUMAN Cytoplasmic FMR1-interacting protein 1 (Fragment) OS=Homo sapiens GN=CYFIP1 PE=1 SV=1	2	8	3	3	2	2	2	2	4	5	1	1	4	4	1	1	5	5	3	3	2	2	3	3	5	6	1	1	1	1	1	2	0	0	2	2	0	0	2	2	0	0
A0A140VJU5;A0A087WW40;Q9Y371	A0A140VJU5;A0A087WW40;Q9Y371	7;7;7	6;6;6	6;6;6	Endophilin-B1	SH3GLB1	>tr|A0A140VJU5|A0A140VJU5_HUMAN SH3-domain GRB2-like endophilin B1, isoform CRA_a OS=Homo sapiens GN=SH3GLB1 PE=2 SV=1;>tr|A0A087WW40|A0A087WW40_HUMAN Endophilin-B1 OS=Homo sapiens GN=SH3GLB1 PE=1 SV=1;>sp|Q9Y371|SHLB1_HUMAN Endophilin-B1 OS=Homo sapiens G	3	7	6	6	0	0	1	1	2	4	0	0	3	2	0	0	4	4	2	2	0	0	2	2	0	0	0	0	1	1	2	3	0	0	3	2	0	0	3	3	2	2
B2R6D0;A0A087WW66;Q99460;Q05CW6;Q05BX4;H7BZR6;H7C378;C9J9M4	B2R6D0;A0A087WW66;Q99460;Q05CW6;Q05BX4	25;25;25;20;19;7;6;5	25;25;25;20;19;7;6;5	25;25;25;20;19;7;6;5	26S proteasome non-ATPase regulatory subunit 1	PSMD1	>tr|B2R6D0|B2R6D0_HUMAN cDNA, FLJ92896, highly similar to Homo sapiens proteasome (prosome, macropain) 26S subunit, non-ATPase, 1 (PSMD1), mRNA OS=Homo sapiens PE=2 SV=1;>tr|A0A087WW66|A0A087WW66_HUMAN 26S proteasome non-ATPase regulatory subunit 1 OS=Homo	8	25	25	25	3	3	0	0	22	23	3	3	6	7	1	2	4	4	5	4	1	1	1	1	1	1	3	3	0	0	22	23	3	3	6	7	1	2	4	4	5	4
A0A087WW89;A0A0F7TAG7;A0A0B4J1Y9;A0A068LKR4	A0A087WW89;A0A0F7TAG7;A0A0B4J1Y9	5;4;4;1	5;4;4;1	1;1;1;0			>tr|A0A087WW89|A0A087WW89_HUMAN Protein IGHV3-72 OS=Homo sapiens GN=IGHV3-72 PE=1 SV=1;>tr|A0A0F7TAG7|A0A0F7TAG7_HUMAN IGHV3-72 protein (Fragment) OS=Homo sapiens GN=IGHV3-72 PE=4 SV=1;>tr|A0A0B4J1Y9|A0A0B4J1Y9_HUMAN Protein IGHV3-72 (Fragment) OS=Homo sap	4	5	5	1	1	1	4	5	1	1	2	2	0	1	1	1	1	1	0	0	1	1	1	1	1	1	1	1	4	5	1	1	2	2	0	1	1	1	1	1	0	0
A0A0C4DGT3;B4DGC5;A0A087WWK8;Q6DN90;Q5JU85	A0A0C4DGT3;B4DGC5;A0A087WWK8;Q6DN90;Q5JU85	2;2;2;2;1	2;2;2;2;1	2;2;2;2;1	IQ motif and SEC7 domain-containing protein 1;IQ motif and SEC7 domain-containing protein 2	IQSEC1;IQSEC2	>tr|A0A0C4DGT3|A0A0C4DGT3_HUMAN IQ motif and SEC7 domain-containing protein 1 OS=Homo sapiens GN=IQSEC1 PE=1 SV=1;>tr|B4DGC5|B4DGC5_HUMAN cDNA FLJ60491, highly similar to IQ motif and Sec7 domain-containing protein 1 OS=Homo sapiens PE=2 SV=1;>tr|A0A087WWK	5	2	2	2	0	0	0	0	0	1	1	1	0	0	0	0	0	0	0	0	0	0	0	0	0	0	0	0	0	0	0	1	1	1	0	0	0	0	0	0	0	0
A0A087WWM4;Q6PKC0;Q9P2T1;H0YMB3;F8WAN9;H0YNJ6;H0YLV5;Q7Z527;Q86SZ5;H0YNH0;H0YK13;H0YK71;H0YMV5;H0YN22;H0YMW6;H0YNS9;H0YMR9;H0YLB8;A0A0B4J281;H0YMG3;H0YKK3;H0YN74;H0YL68;H0YKE1	A0A087WWM4;Q6PKC0;Q9P2T1;H0YMB3;F8WAN9;H0YNJ6;H0YLV5;Q7Z527;Q86SZ5	13;13;13;12;12;12;11;11;8;6;5;5;5;4;4;4;4;4;3;3;2;2;1;1	12;12;12;11;11;11;10;10;7;6;4;4;5;3;3;4;4;4;3;3;2;2;1;1	12;12;12;11;11;11;10;10;7;6;4;4;5;3;3;4;4;4;3;3;2;2;1;1	GMP reductase;GMP reductase 2	GMPR2	>tr|A0A087WWM4|A0A087WWM4_HUMAN GMP reductase OS=Homo sapiens GN=GMPR2 PE=1 SV=1;>tr|Q6PKC0|Q6PKC0_HUMAN GMP reductase OS=Homo sapiens GN=GMPR2 PE=2 SV=1;>sp|Q9P2T1|GMPR2_HUMAN GMP reductase 2 OS=Homo sapiens GN=GMPR2 PE=1 SV=1;>tr|H0YMB3|H0YMB3_HUMAN GMP	24	13	12	12	2	3	5	4	4	5	1	1	3	3	0	0	7	6	6	4	4	4	5	6	5	5	1	2	4	3	3	4	1	1	2	2	0	0	6	6	5	3
A6NDY9;A0A087WWY3;Q5HY54;Q60FE6;Q60FE5;P21333	A6NDY9;A0A087WWY3;Q5HY54;Q60FE6;Q60FE5;P21333	8;8;8;8;8;8	2;2;2;2;2;2	2;2;2;2;2;2	Filamin-A	FLNA	>tr|A6NDY9|A6NDY9_HUMAN Filamin A OS=Homo sapiens GN=FLNA PE=2 SV=4;>tr|A0A087WWY3|A0A087WWY3_HUMAN Filamin-A OS=Homo sapiens GN=FLNA PE=1 SV=1;>tr|Q5HY54|Q5HY54_HUMAN Filamin-A OS=Homo sapiens GN=FLNA PE=1 SV=1;>tr|Q60FE6|Q60FE6_HUMAN Filamin A OS=Homo sa	6	8	2	2	1	1	3	3	3	4	0	0	3	3	2	2	3	2	1	1	4	4	4	4	2	2	0	0	0	0	0	0	0	0	0	0	2	2	0	0	0	0
6;E3SGC8;E3Q0T3;E2GJP1;E2DHB9;E2D5U9;E2D5U2;E1U685;E0X9N0;E0WN74;E0WN73;D9UAX2;D9U3H8;D9IFR3;D9IFR0;D9IFQ9;D7RJ37;D7NR20;D7NPQ4;D7GN79;D7GK38;D6CI38;D5G251;D5G249;D5FZP2;D5FZN9;D3UTA6;D3U4F1;D3JV18;D3JV14;D3JV09;D2SSL7;D2K7S2;D2EAF6;D2DL42;D2D3I3;D2D3I2;D2D3I1;D2D3I0;D2D3H8;D2D3H7;D2D3H6;D2D3H5;D2D3H4;D2D3H3;D2D3H2;D2D3H1;D2D3H0;D2D3G9;D2D3G8;D2D3G7;D0VE59;D0VE58;D0VE52;D0VE51;D0VE50;D0V3Q2;C9WEY…	Q3LAC3;Q3LAC2;Q3LA86;I6YAZ4;F2RM38;F2QL89;D0RB87;A0A168GUL9;A0A142FK32;A0A110BDC4;A0A0U5J6C8;A0A090JX86;O19678;E0Z0A8;O19763;O19762;M1UZ77;M1VED6;U3PQT7;G9FJH9;A0A0A0WGI7;A0A0A0WDY8;S6BVM7;S6B6T3;S6AP21;X5DNQ0;S6B225;Q5Y7D1;D7RIH9;D7RIH8;D7RIH3;D7RIH2;B7ZW57;A8K634;A0A0A8LFF3;A0A0A8LCM8;A0A0A8LCK8;A0A0A8LCK0;A0A0A8LC38;A0A0A1IBA8;A0A0A1I9Q7;A0A0A1I8N6;A0A0A1I8N2;A0A0A1I7H4;A0A098GK79;A0A087WX18;Q…	3;3;3;3;3;3;3;3;3;3;3;3;3;3;3;3;3;3;3;3;3;3;3;3;3;3;3;3;3;3;3;3;3;3;3;3;3;3;3;3;3;3;3;3;3;3;3;3;3;3;2;2;2;2;2;2;2;2;2;2;2;2;2;2;2;2;2;2;2;2;2;2;2;2;2;2;2;2;2;2;2;2;2;2;2;2;2;2;2;2;2;2;2;2;2;2;2;2;2;2;2;2;2;2;2;2;2;2;2;2;2;2;2;2;2;2;2;2;2;2;2;2;2;2;2;2;2;2;2;2;2;2;2;2;2;2;2;2;2;2;2;2;2;2;2;2;2;2;2;2;2;2;2;2;2;2;2;2;2;2;2;2;2;2;2;2;2;2;2;2;2;2;2;2;2;2;2;2;2;2;2;2;2;2;2;2;2;2;2;2;2;2;2;2;2;2;2;2;2;2…	3;3;3;3;3;3;3;3;3;3;3;3;3;3;3;3;3;3;3;3;3;3;3;3;3;3;3;3;3;3;3;3;3;3;3;3;3;3;3;3;3;3;3;3;3;3;3;3;3;3;2;2;2;2;2;2;2;2;2;2;2;2;2;2;2;2;2;2;2;2;2;2;2;2;2;2;2;2;2;2;2;2;2;2;2;2;2;2;2;2;2;2;2;2;2;2;2;2;2;2;2;2;2;2;2;2;2;2;2;2;2;2;2;2;2;2;2;2;2;2;2;2;2;2;2;2;2;2;2;2;2;2;2;2;2;2;2;2;2;2;2;2;2;2;2;2;2;2;2;2;2;2;2;2;2;2;2;2;2;2;2;2;2;2;2;2;2;2;2;2;2;2;2;2;2;2;2;2;2;2;2;2;2;2;2;2;2;2;2;2;2;2;2;2;2;2;2;2;2;2…	3;3;3;3;3;3;3;3;3;3;3;3;3;3;3;3;3;3;3;3;3;3;3;3;3;3;3;3;3;3;3;3;3;3;3;3;3;3;3;3;3;3;3;3;3;3;3;3;3;3;2;2;2;2;2;2;2;2;2;2;2;2;2;2;2;2;2;2;2;2;2;2;2;2;2;2;2;2;2;2;2;2;2;2;2;2;2;2;2;2;2;2;2;2;2;2;2;2;2;2;2;2;2;2;2;2;2;2;2;2;2;2;2;2;2;2;2;2;2;2;2;2;2;2;2;2;2;2;2;2;2;2;2;2;2;2;2;2;2;2;2;2;2;2;2;2;2;2;2;2;2;2;2;2;2;2;2;2;2;2;2;2;2;2;2;2;2;2;2;2;2;2;2;2;2;2;2;2;2;2;2;2;2;2;2;2;2;2;2;2;2;2;2;2;2;2;2;2;2;2…	HLA class II histocompatibility antigen, DRB1-13 beta chain;HLA class II histocompatibility antigen, DRB1-3 chain;HLA class II histocompatibility antigen, DRB1-15 beta chain;HLA class II histocompatibility antigen, DRB1-12 beta chain;HLA class II histocompatibility antigen, DRB1-11 beta chain;HLA class II histocompatibility antigen, DRB1-16 beta chain;HLA class II histocompatibility antigen, DRB1…	HLA-DRB1;HLA-DRB4;HLA-DR;DRB1;HLA-DRB1*1327;HLA-DRB1*;MHC class II HLA-DRB1 Exon-2;DRB1*13PL;MHC class II HLA-DRB1*1315;HLA-DRB1*1324;HLA-DR3;HLA-DR15;HLA-C;HLA-DRB3;HLA-DRB1*1302Var;HLA DRB1;MHC class II HLA DRB1-0305;HLA-DQB1;HLA-DRB;HLA-A;HLA-DR08;HLA-D;HLA-DR-beta1;HLA-DRw12	>tr|Q3LAC3|Q3LAC3_HUMAN MHC class II antigen (Fragment) OS=Homo sapiens GN=HLA-DRB1 PE=3 SV=1;>tr|Q3LAC2|Q3LAC2_HUMAN MHC class II antigen (Fragment) OS=Homo sapiens GN=HLA-DRB1 PE=3 SV=1;>tr|Q3LA86|Q3LA86_HUMAN MHC class II antigen (Fragment) OS=Homo sapi	4436	3	3	3	0	0	3	3	0	0	0	0	0	0	0	0	0	0	0	0	0	0	0	0	0	0	0	0	3	3	0	0	0	0	0	0	0	0	0	0	0	0
A0A087WX41;P53675;A4FU99;F5H5N6	A0A087WX41;P53675	18;18;5;1	1;1;0;0	1;1;0;0	Clathrin heavy chain 2	CLTCL1	>tr|A0A087WX41|A0A087WX41_HUMAN Clathrin heavy chain 2 OS=Homo sapiens GN=CLTCL1 PE=1 SV=1;>sp|P53675|CLH2_HUMAN Clathrin heavy chain 2 OS=Homo sapiens GN=CLTCL1 PE=1 SV=2	4	18	1	1	10	10	11	11	15	15	6	6	13	13	7	7	11	11	6	5	9	9	10	10	12	12	0	0	0	0	1	1	0	0	0	0	0	0	0	0	0	0
B4E2V7;A0A087WXB0;O15126;A0A087WU14;A8K2G0;B4DP10;Q96AZ4;A0A087WTX8;A0A087WZA6	B4E2V7;A0A087WXB0;O15126;A0A087WU14;A8K2G0;B4DP10	8;8;8;6;5;4;3;2;2	8;8;8;6;5;4;3;2;2	8;8;8;6;5;4;3;2;2	Secretory carrier-associated membrane protein 1	SCAMP1	>tr|B4E2V7|B4E2V7_HUMAN cDNA FLJ54243, highly similar to Secretory carrier-associated membrane protein1 OS=Homo sapiens PE=2 SV=1;>tr|A0A087WXB0|A0A087WXB0_HUMAN Secretory carrier-associated membrane protein 1 OS=Homo sapiens GN=SCAMP1 PE=1 SV=1;>sp|O15126	9	8	8	8	2	2	4	4	5	5	5	5	2	2	1	1	6	6	2	1	4	4	4	4	6	6	2	2	4	4	5	5	5	5	2	2	1	1	6	6	2	1
A0A087WXM8;I7L574;I7KDP0;G0TQY6;P50895;A0A1A9C7B7;A0A0A1TTQ0;A0A068W6H0;K7ENU8;A0A142CG40;A9YWT4;A0A0U3LNL0;K7ERB7;A0A0U4CBV7;A0A172M5V3	A0A087WXM8;I7L574;I7KDP0;G0TQY6;P50895;A0A1A9C7B7;A0A0A1TTQ0;A0A068W6H0;K7ENU8;A0A142CG40	16;16;16;16;16;15;15;15;13;10;5;2;1;1;1	16;16;16;16;16;15;15;15;13;10;5;2;1;1;1	16;16;16;16;16;15;15;15;13;10;5;2;1;1;1	Basal cell adhesion molecule	LU;BCAM	>tr|A0A087WXM8|A0A087WXM8_HUMAN Basal cell adhesion molecule OS=Homo sapiens GN=BCAM PE=1 SV=1;>tr|I7L574|I7L574_HUMAN Lutheran blood group OS=Homo sapiens GN=LU PE=4 SV=1;>tr|I7KDP0|I7KDP0_HUMAN Lutheran blood group OS=Homo sapiens GN=LU PE=4 SV=1;>tr|G0T	15	16	16	16	2	2	2	1	5	6	5	5	1	1	2	2	8	9	1	1	2	2	3	3	5	4	2	2	2	1	5	6	5	5	1	1	2	2	8	9	1	1
A0A0G2JND4;A0A087WXM9	A0A0G2JND4;A0A087WXM9	2;2	2;2	2;2			>tr|A0A0G2JND4|A0A0G2JND4_HUMAN Meiosis-specific kinetochore protein OS=Homo sapiens GN=MEIKIN PE=4 SV=1;>sp|A0A087WXM9|MEIKN_HUMAN Meiosis-specific kinetochore protein OS=Homo sapiens GN=MEIKIN PE=2 SV=2	2	2	2	2	1	1	0	0	2	1	0	0	1	1	0	0	1	1	0	0	1	1	1	1	1	1	1	1	0	0	2	1	0	0	1	1	0	0	1	1	0	0
B4DEE5;A0A087WXS7;O43681;K7ERW9	B4DEE5;A0A087WXS7;O43681;K7ERW9	2;2;2;1	2;2;2;1	2;2;2;1	ATPase ASNA1	ASNA1	>tr|B4DEE5|B4DEE5_HUMAN cDNA FLJ60230, highly similar to Arsenical pump-driving ATPase (EC 3.6.3.16) OS=Homo sapiens PE=2 SV=1;>tr|A0A087WXS7|A0A087WXS7_HUMAN ATPase ASNA1 OS=Homo sapiens GN=ASNA1 PE=1 SV=1;>sp|O43681|ASNA_HUMAN ATPase ASNA1 OS=Homo sapien	4	2	2	2	1	1	0	0	2	2	0	0	1	1	0	0	2	2	0	0	1	1	1	1	1	1	1	1	0	0	2	2	0	0	1	1	0	0	2	2	0	0
D3VVE7;D3VVK9;D3VVI7;D3VVB8;D3VVT2;G3V526;E9PJN5;D3VVM8;D3VVI4;D3VVI1;D3VVE8;D3VVM1;D3VVM0;D3VVR0;D3VVS5;D3VVR8;D3VVK4;D3VVM2;G3V2G1;D3VVD4;D3VVQ7;D3VVP4;D3VVN3;D3VVI0;G3V328;D3VVT1;D3VVD9;D3VVN9;D3VVP8;D3VVK3;D3VVJ8;G3V4U9;D3VVR5;D3VVM6;D3VVL3;D3VVC0;D3VVB6;D3VVQ8;D3VVQ6;D3VVQ3;D3VVQ1;D3VVQ0;D3VVF7;D3VVS2;D3VVQ5;D3VVQ4;D3VVP1;D3VVK1;D3VVC5;D3VVB2;D3VVB1;D3VVB0;A0A087WXY4;D3VVR4;D3VVL2;D3VVG1;D3V…	D3VVE7;D3VVK9;D3VVI7;D3VVB8;D3VVT2;G3V526;E9PJN5;D3VVM8;D3VVI4;D3VVI1;D3VVE8;D3VVM1;D3VVM0;D3VVR0;D3VVS5;D3VVR8;D3VVK4;D3VVM2;G3V2G1;D3VVD4;D3VVQ7;D3VVP4;D3VVN3;D3VVI0;G3V328;D3VVT1;D3VVD9;D3VVN9;D3VVP8;D3VVK3;D3VVJ8;G3V4U9;D3VVR5;D3VVM6;D3VVL3;D3VVC0;D3VVB6;D3VVQ8;D3VVQ6;D3VVQ3;D3VVQ1;D3VVQ0;D3VVF7;D3VVS2;D3VVQ5;D3VVQ4;D3VVP1;D3VVK1;D3VVC5;D3VVB2;D3VVB1;D3VVB0;A0A087WXY4;D3VVR4;D3VVL2;D3VVG1;D3V…	2;2;2;2;2;2;2;2;2;2;2;2;2;2;2;2;2;2;2;2;2;2;2;2;2;2;2;2;2;2;2;2;2;2;2;2;2;2;2;2;2;2;2;2;2;2;2;2;2;2;2;2;2;2;2;2;2;2;2;2;2;2;2;2;2;2;2;2;2;2;2;2;2;2;2;2;2;2;2;2;2;2;2;2;2;2;2;2;2;2;2;2;2;2;2;2;2;2;2;2;2;2;2;2;2;2;2;2;2;2;2;2;2;2;2;2;2;2;2;2;2;2;2;2;2;2;2;2;2;2;2;2;2;2;2;2;2;2;2;1;1;1;1;1;1;1;1;1;1;1;1;1;1;1;1;1;1;1;1;1;1;1;1;1;1;1;1;1	2;2;2;2;2;2;2;2;2;2;2;2;2;2;2;2;2;2;2;2;2;2;2;2;2;2;2;2;2;2;2;2;2;2;2;2;2;2;2;2;2;2;2;2;2;2;2;2;2;2;2;2;2;2;2;2;2;2;2;2;2;2;2;2;2;2;2;2;2;2;2;2;2;2;2;2;2;2;2;2;2;2;2;2;2;2;2;2;2;2;2;2;2;2;2;2;2;2;2;2;2;2;2;2;2;2;2;2;2;2;2;2;2;2;2;2;2;2;2;2;2;2;2;2;2;2;2;2;2;2;2;2;2;2;2;2;2;2;2;1;1;1;1;1;1;1;1;1;1;1;1;1;1;1;1;1;1;1;1;1;1;1;1;1;1;1;1;1	1;1;1;1;1;1;1;1;1;1;1;1;1;1;1;1;1;1;1;1;1;1;1;1;1;1;1;1;1;1;1;1;1;1;1;1;1;1;1;1;1;1;1;1;1;1;1;1;1;1;1;1;1;1;1;1;1;1;1;1;1;1;1;1;1;1;1;1;1;1;1;1;1;1;1;1;1;1;1;1;1;1;1;1;1;1;1;1;1;1;1;1;1;1;1;1;1;1;1;1;1;1;1;1;1;1;1;1;1;1;1;1;1;1;1;1;1;1;1;1;1;1;1;1;1;1;1;1;1;1;1;1;1;1;1;1;1;1;1;1;1;1;1;1;1;1;1;1;1;1;1;1;1;1;1;1;1;1;1;1;1;1;1;1;1;1;1;1	Ataxin-3	ATXN3	>tr|D3VVE7|D3VVE7_HUMAN Ataxin 3 variant r OS=Homo sapiens GN=ATXN3 PE=2 SV=1;>tr|D3VVK9|D3VVK9_HUMAN Ataxin 3 variant e OS=Homo sapiens GN=ATXN3 PE=2 SV=1;>tr|D3VVI7|D3VVI7_HUMAN Ataxin 3 variant e OS=Homo sapiens GN=ATXN3 PE=2 SV=1;>tr|D3VVB8|D3VVB8_HUMA	168	2	2	1	0	0	0	0	0	0	0	0	1	1	1	1	1	1	0	0	0	0	0	0	0	0	0	0	0	0	0	0	0	0	1	1	1	1	1	1	0	0
A8CDT9;A0A087WY00;G3V394;F8WE88;F8W6H6;Q9Y4I1;Q59FF5;B4E147;E7ERV5;B5LY56;G3V3C9;Q9UES3;O95318;Q9UES4;Q9UES5;O95317	A8CDT9;A0A087WY00;G3V394;F8WE88;F8W6H6;Q9Y4I1;Q59FF5;B4E147	19;19;19;19;19;19;14;11;4;4;2;2;2;2;2;2	13;13;13;13;13;13;10;6;4;4;1;2;2;2;2;2	11;11;11;11;11;11;8;5;3;3;1;1;1;1;1;1	Unconventional myosin-Va	MYO5A	>tr|A8CDT9|A8CDT9_HUMAN MYO5A variant protein OS=Homo sapiens PE=2 SV=1;>tr|A0A087WY00|A0A087WY00_HUMAN Unconventional myosin-Va OS=Homo sapiens GN=MYO5A PE=1 SV=1;>tr|G3V394|G3V394_HUMAN Unconventional myosin-Va OS=Homo sapiens GN=MYO5A PE=1 SV=1;>tr|F8WE	16	19	13	11	2	2	3	4	11	8	2	3	6	5	0	0	8	8	2	2	4	5	4	4	2	2	1	0	0	0	6	3	1	2	3	2	0	0	5	5	1	1
A0A087WY45;K9JA26;Q96BH3;M0R006;M0R331;M0QZH6	A0A087WY45;K9JA26;Q96BH3;M0R006;M0R331	13;13;13;10;10;3	13;13;13;10;10;3	13;13;13;10;10;3	Epididymal sperm-binding protein 1	EL149;ELSPBP1	>tr|A0A087WY45|A0A087WY45_HUMAN Epididymal sperm-binding protein 1 OS=Homo sapiens GN=ELSPBP1 PE=1 SV=1;>tr|K9JA26|K9JA26_HUMAN Epididymis luminal secretory protein 149 OS=Homo sapiens GN=EL149 PE=2 SV=1;>sp|Q96BH3|ESPB1_HUMAN Epididymal sperm-binding prot	6	13	13	13	8	8	7	7	13	13	2	3	5	6	7	7	9	9	4	4	7	7	7	7	7	7	8	8	7	7	13	13	2	3	5	6	7	7	9	9	4	4
A0A087WY55;Q9NP79;Q9C063;Q5TGM0	A0A087WY55;Q9NP79;Q9C063	9;9;6;4	9;9;6;4	9;9;6;4	Vacuolar protein sorting-associated protein VTA1 homolog	VTA1	>tr|A0A087WY55|A0A087WY55_HUMAN Chromosome 6 open reading frame 55, isoform CRA_b OS=Homo sapiens GN=VTA1 PE=1 SV=1;>sp|Q9NP79|VTA1_HUMAN Vacuolar protein sorting-associated protein VTA1 homolog OS=Homo sapiens GN=VTA1 PE=1 SV=1;>tr|Q9C063|Q9C063_HUMAN LYS	4	9	9	9	5	6	6	6	7	7	2	2	7	7	2	2	6	6	2	2	6	6	5	5	6	7	5	6	6	6	7	7	2	2	7	7	2	2	6	6	2	2
A0A087WY71;Q96CW1;B4E304;E9PFW3;B4DNB9;B4DJB1;B4DFM1;C9JJ47;C9JGT8;B4DTI4;C9JJD3;B7Z4N2;C9JPV8;H7C4C3	A0A087WY71;Q96CW1;B4E304;E9PFW3;B4DNB9;B4DJB1;B4DFM1;C9JJ47;C9JGT8;B4DTI4	12;12;11;11;10;9;9;8;6;6;5;5;4;2	12;12;11;11;10;9;9;8;6;6;5;5;4;2	7;7;7;6;5;7;6;3;1;6;1;4;0;2	AP-2 complex subunit mu	AP2M1	>tr|A0A087WY71|A0A087WY71_HUMAN AP-2 complex subunit mu OS=Homo sapiens GN=AP2M1 PE=1 SV=1;>sp|Q96CW1|AP2M1_HUMAN AP-2 complex subunit mu OS=Homo sapiens GN=AP2M1 PE=1 SV=2;>tr|B4E304|B4E304_HUMAN cDNA FLJ53962, highly similar to AP-2 complex subunit mu-1	14	12	12	7	2	2	3	2	9	8	3	3	5	5	0	0	7	7	1	1	5	5	5	6	6	7	2	2	3	2	9	8	3	3	5	5	0	0	7	7	1	1
B4DPK9;A0A087WYF6;F8W7U3;J3KP36;E7ESD2;B7ZME8;A8K5W5;A0A0A0MR88;A0A096LPC5;Q9Y4E1;Q641Q2;B4DHJ2;Q9NVB8;B4DF48;A0A0A0MT65	B4DPK9;A0A087WYF6;F8W7U3;J3KP36;E7ESD2;B7ZME8;A8K5W5;A0A0A0MR88;A0A096LPC5;Q9Y4E1;Q641Q2;B4DHJ2;Q9NVB8;B4DF48	3;3;3;3;3;3;3;3;3;3;3;2;2;2;1	3;3;3;3;3;3;3;3;3;3;3;2;2;2;1	3;3;3;3;3;3;3;3;3;3;3;2;2;2;1	WASH complex subunit FAM21C;WASH complex subunit FAM21A	FAM21A;FAM21C	>tr|B4DPK9|B4DPK9_HUMAN cDNA FLJ55935, highly similar to Protein FAM21C (Fragment) OS=Homo sapiens PE=2 SV=1;>tr|A0A087WYF6|A0A087WYF6_HUMAN WASH complex subunit FAM21A OS=Homo sapiens GN=FAM21A PE=1 SV=1;>tr|F8W7U3|F8W7U3_HUMAN WASH complex subunit FAM21A	15	3	3	3	0	0	1	1	0	0	1	0	0	0	0	0	1	0	1	1	0	0	0	0	2	1	0	0	1	1	0	0	1	0	0	0	0	0	1	0	1	1
B3KNK2;X5D9C2;X5D9G4;A0A0A8K8P7;X5D7P3;B7Z5L4;A0A087WYL5;Q6UXD5;Q8NC33;X5D2T7;X5DNZ5;B3KNF3;H3BN26	B3KNK2;X5D9C2;X5D9G4;A0A0A8K8P7;X5D7P3;B7Z5L4;A0A087WYL5;Q6UXD5;Q8NC33;X5D2T7;X5DNZ5;B3KNF3	4;4;4;4;4;4;4;4;3;3;3;2;1	4;4;4;4;4;4;4;4;3;3;3;2;1	4;4;4;4;4;4;4;4;3;3;3;2;1	Seizure 6-like protein 2	SEZ6L2	>tr|B3KNK2|B3KNK2_HUMAN cDNA FLJ14770 fis, clone NT2RP3004207, highly similar to Homo sapiens seizure related 6 homolog (mouse)-like 2 (SEZ6L2), transcript variant 1, mRNA OS=Homo sapiens PE=2 SV=1;>tr|X5D9C2|X5D9C2_HUMAN Seizure related 6-like protein 2 i	13	4	4	4	0	0	0	0	0	0	0	0	0	0	0	0	4	4	1	1	1	1	0	0	0	0	0	0	0	0	0	0	0	0	0	0	0	0	4	4	1	1
B4DZ26;B7Z7W7;B4DYW5;A0A087WYM5;Q9BVV6	B4DZ26;B7Z7W7;B4DYW5;A0A087WYM5;Q9BVV6	2;2;2;2;2	2;2;2;2;2	2;2;2;2;2	Protein TALPID3	KIAA0586	>tr|B4DZ26|B4DZ26_HUMAN cDNA FLJ52371 OS=Homo sapiens PE=2 SV=1;>tr|B7Z7W7|B7Z7W7_HUMAN cDNA FLJ52366 OS=Homo sapiens PE=2 SV=1;>tr|B4DYW5|B4DYW5_HUMAN cDNA FLJ61484 OS=Homo sapiens PE=2 SV=1;>tr|A0A087WYM5|A0A087WYM5_HUMAN Protein TALPID3 OS=Homo sapiens	5	2	2	2	0	0	0	1	1	1	0	1	0	0	0	0	1	1	0	0	0	1	0	0	0	0	0	0	0	1	1	1	0	1	0	0	0	0	1	1	0	0
Q68E05;Q6FGS1;A0A087WYR3;O43399;A0A087WZ51;Q53GA0;Q5J908;B4DDV4	Q68E05;Q6FGS1;A0A087WYR3;O43399;A0A087WZ51;Q53GA0;Q5J908	5;5;5;5;4;4;3;2	5;5;5;5;4;4;3;2	5;5;5;5;4;4;3;2	Tumor protein D54	DKFZp686A1765;TPD52L2	>tr|Q68E05|Q68E05_HUMAN Putative uncharacterized protein DKFZp686A1765 OS=Homo sapiens GN=DKFZp686A1765 PE=2 SV=1;>tr|Q6FGS1|Q6FGS1_HUMAN TPD52L2 protein OS=Homo sapiens GN=TPD52L2 PE=1 SV=1;>tr|A0A087WYR3|A0A087WYR3_HUMAN Tumor protein D54 OS=Homo sapiens	8	5	5	5	2	2	3	3	2	3	1	1	2	2	0	0	2	2	3	3	1	1	3	3	3	3	2	2	3	3	2	3	1	1	2	2	0	0	2	2	3	3
A0A140VKE1;A0A087WYS1;E7EUC7;B4DUP2;Q16851;B2RAN1;Q53QE9;D6W5E6;C9JNZ1;C9JVG3;C9JQU9;C9JWG0;C9JUW1;C9JTZ5;F2Z3H1	A0A140VKE1;A0A087WYS1;E7EUC7;B4DUP2;Q16851;B2RAN1;Q53QE9;D6W5E6	26;26;26;26;26;25;23;16;12;10;10;9;7;6;3	26;26;26;26;26;25;23;16;12;10;10;9;7;6;3	26;26;26;26;26;25;23;16;12;10;10;9;7;6;3	UTP--glucose-1-phosphate uridylyltransferase	UGP2	>tr|A0A140VKE1|A0A140VKE1_HUMAN Testis tissue sperm-binding protein Li 58p OS=Homo sapiens PE=2 SV=1;>tr|A0A087WYS1|A0A087WYS1_HUMAN UTP--glucose-1-phosphate uridylyltransferase OS=Homo sapiens GN=UGP2 PE=1 SV=1;>tr|E7EUC7|E7EUC7_HUMAN UTP--glucose-1-phosp	15	26	26	26	5	5	12	12	18	20	3	3	9	9	4	5	12	14	6	6	13	13	7	8	11	12	5	5	12	12	18	20	3	3	9	9	4	5	12	14	6	6
A0A087WYS6;Q4G1B8	A0A087WYS6;Q4G1B8	8;7	1;1	1;1		PSMA8	>tr|A0A087WYS6|A0A087WYS6_HUMAN Proteasome (Prosome, macropain) subunit, alpha type, 8, isoform CRA_b OS=Homo sapiens GN=PSMA8 PE=1 SV=1;>tr|Q4G1B8|Q4G1B8_HUMAN PSMA8 protein OS=Homo sapiens GN=PSMA8 PE=2 SV=1	2	8	1	1	2	2	2	2	7	7	0	0	2	2	2	2	4	4	1	1	1	1	0	0	2	2	0	0	0	0	1	1	0	0	0	0	0	0	0	0	0	0
A0A087WYU2;Q96S19;H3BS73;H3BRT2;H3BQ55;H3BNT3;H3BNB2;H3BMF3	A0A087WYU2;Q96S19;H3BS73;H3BRT2;H3BQ55;H3BNT3;H3BNB2;H3BMF3	2;2;1;1;1;1;1;1	2;2;1;1;1;1;1;1	2;2;1;1;1;1;1;1	UPF0585 protein C16orf13	C16orf13	>tr|A0A087WYU2|A0A087WYU2_HUMAN Protein METTL26 OS=Homo sapiens GN=METTL26 PE=1 SV=1;>sp|Q96S19|CP013_HUMAN UPF0585 protein C16orf13 OS=Homo sapiens GN=C16orf13 PE=1 SV=2;>tr|H3BS73|H3BS73_HUMAN Protein METTL26 OS=Homo sapiens GN=METTL26 PE=1 SV=1;>tr|H3BR	8	2	2	2	0	0	1	0	0	1	1	1	0	0	0	0	1	0	0	0	0	0	0	0	0	0	0	0	1	0	0	1	1	1	0	0	0	0	1	0	0	0
A0A087WYY3;Q9H7F0	A0A087WYY3;Q9H7F0	2;2	2;2	2;2	Probable cation-transporting ATPase 13A3	ATP13A3	>tr|A0A087WYY3|A0A087WYY3_HUMAN Cation-transporting ATPase OS=Homo sapiens GN=ATP13A3 PE=1 SV=1;>sp|Q9H7F0|AT133_HUMAN Probable cation-transporting ATPase 13A3 OS=Homo sapiens GN=ATP13A3 PE=1 SV=4	2	2	2	2	0	0	0	0	2	2	0	0	0	0	0	0	1	1	0	0	0	0	1	1	0	0	0	0	0	0	2	2	0	0	0	0	0	0	1	1	0	0
A0A087WZ50;Q8TCT7;A0A087WWL4;A0A087WZ93	A0A087WZ50;Q8TCT7;A0A087WWL4;A0A087WZ93	2;2;1;1	2;2;1;1	2;2;1;1	Signal peptide peptidase-like 2B	SPPL2B	>tr|A0A087WZ50|A0A087WZ50_HUMAN Signal peptide peptidase-like 2B OS=Homo sapiens GN=SPPL2B PE=1 SV=1;>sp|Q8TCT7|SPP2B_HUMAN Signal peptide peptidase-like 2B OS=Homo sapiens GN=SPPL2B PE=1 SV=2;>tr|A0A087WWL4|A0A087WWL4_HUMAN Signal peptide peptidase-like 2	4	2	2	2	0	0	0	0	1	1	0	0	0	0	0	0	1	1	0	0	0	0	0	0	0	0	0	0	0	0	1	1	0	0	0	0	0	0	1	1	0	0
A0A087WZG8;Q5D1Q2;H0Y3S0	A0A087WZG8	17;6;6	2;1;1	2;1;1			>tr|A0A087WZG8|A0A087WZG8_HUMAN Lipase member I OS=Homo sapiens GN=LIPI PE=3 SV=1	3	17	2	2	2	2	4	4	11	10	5	5	8	8	8	9	10	10	2	2	1	1	1	1	4	4	1	1	1	1	1	1	0	0	1	1	1	1	1	1	0	0
D6RHI9;A0A087WZM2;A6XND5;O00584;H0YAE9;A0A087WWI1;Q8TCU1;J3QQ64	D6RHI9;A0A087WZM2;A6XND5;O00584;H0YAE9	16;16;16;16;9;3;3;1	16;16;16;16;9;3;3;1	1;1;1;1;1;1;1;1	Ribonuclease T2	RNASET2	>tr|D6RHI9|D6RHI9_HUMAN Ribonuclease T2 (Fragment) OS=Homo sapiens GN=RNASET2 PE=1 SV=8;>tr|A0A087WZM2|A0A087WZM2_HUMAN Ribonuclease T2 OS=Homo sapiens GN=RNASET2 PE=1 SV=1;>tr|A6XND5|A6XND5_HUMAN Ribonuclease T2 OS=Homo sapiens PE=2 SV=1;>sp|O00584|RNT2_H	8	16	16	1	7	7	7	7	6	5	10	10	8	8	11	10	10	10	7	7	8	7	5	5	5	4	7	7	7	7	6	5	10	10	8	8	11	10	10	10	7	7
A0A0S2Z5I7;A0A087X020;Q9Y3A5;F8WE72;A0A0S2Z5F7	A0A0S2Z5I7;A0A087X020;Q9Y3A5	9;9;9;4;3	9;9;9;4;3	9;9;9;4;3	Ribosome maturation protein SBDS	SBDS	>tr|A0A0S2Z5I7|A0A0S2Z5I7_HUMAN Shwachman-Bodian-Diamond syndrome isoform 1 (Fragment) OS=Homo sapiens GN=SBDS PE=2 SV=1;>tr|A0A087X020|A0A087X020_HUMAN Ribosome maturation protein SBDS OS=Homo sapiens GN=SBDS PE=1 SV=1;>sp|Q9Y3A5|SBDS_HUMAN Ribosome matur	5	9	9	9	0	0	3	3	2	1	3	2	3	3	0	0	2	1	1	1	2	2	3	3	2	2	0	0	3	3	2	1	3	2	3	3	0	0	2	1	1	1
A0A087X054;Q9Y4L1;B7Z2N4;B3KXH0;B7Z766;E9PJ21;Q05D91;A0A087WWI4;Q6IN67;K7EQK2;A0A024R3G0;B7Z602;J3KTF1;J3QL06;Q9BST8;J3QQH7;J3QLE9;B7Z4E6;A0A087X214;A0A087WW13;Q68D25	A0A087X054;Q9Y4L1;B7Z2N4;B3KXH0;B7Z766;E9PJ21;Q05D91;A0A087WWI4;Q6IN67;K7EQK2;A0A024R3G0	30;30;29;29;25;23;23;23;23;23;16;12;10;9;5;5;5;5;3;3;2	30;30;29;29;25;23;23;23;23;23;16;12;10;9;5;5;5;5;3;3;2	30;30;29;29;25;23;23;23;23;23;16;12;10;9;5;5;5;5;3;3;2	Hypoxia up-regulated protein 1	HYOU1	>tr|A0A087X054|A0A087X054_HUMAN Hypoxia up-regulated protein 1 OS=Homo sapiens GN=HYOU1 PE=1 SV=1;>sp|Q9Y4L1|HYOU1_HUMAN Hypoxia up-regulated protein 1 OS=Homo sapiens GN=HYOU1 PE=1 SV=1;>tr|B7Z2N4|B7Z2N4_HUMAN cDNA FLJ56074, highly similar to 150 kDa oxyg	21	30	30	30	11	11	6	8	22	24	8	8	12	12	9	9	13	14	8	8	12	13	6	6	8	9	11	11	6	8	22	24	8	8	12	12	9	9	13	14	8	8
A0A087X0D5;Q6IBC3;P09668;B7Z378;Q68D46;Q6LAF8	A0A087X0D5;Q6IBC3;P09668;B7Z378	13;13;13;7;5;2	13;13;13;7;5;2	8;8;8;3;5;1	Pro-cathepsin H;Cathepsin H mini chain;Cathepsin H;Cathepsin H heavy chain;Cathepsin H light chain	CTSH	>tr|A0A087X0D5|A0A087X0D5_HUMAN Pro-cathepsin H OS=Homo sapiens GN=CTSH PE=1 SV=1;>tr|Q6IBC3|Q6IBC3_HUMAN CTSH protein OS=Homo sapiens GN=CTSH PE=2 SV=1;>sp|P09668|CATH_HUMAN Pro-cathepsin H OS=Homo sapiens GN=CTSH PE=1 SV=4;>tr|B7Z378|B7Z378_HUMAN cDNA FL	6	13	13	8	4	4	10	10	10	11	3	3	5	5	6	6	6	6	2	2	7	7	6	6	6	6	4	4	10	10	10	11	3	3	5	5	6	6	6	6	2	2
A0A087X0S5;P12109;B4DQV1;B4DRR8;D3DSM7;Q8TBN2;Q05BT9	A0A087X0S5;P12109;B4DQV1;B4DRR8;D3DSM7	16;16;9;9;9;7;3	16;16;9;9;9;7;3	16;16;9;9;9;7;3	Collagen alpha-1(VI) chain	COL6A1	>tr|A0A087X0S5|A0A087X0S5_HUMAN Collagen alpha-1(VI) chain OS=Homo sapiens GN=COL6A1 PE=1 SV=1;>sp|P12109|CO6A1_HUMAN Collagen alpha-1(VI) chain OS=Homo sapiens GN=COL6A1 PE=1 SV=3;>tr|B4DQV1|B4DQV1_HUMAN cDNA FLJ58994, highly similar to Collagen alpha-1(V	7	16	16	16	5	6	10	9	1	1	5	4	3	3	3	3	4	4	1	1	3	3	6	6	3	3	5	6	10	9	1	1	5	4	3	3	3	3	4	4	1	1
A0A087X0T3;A7E2Y1	A0A087X0T3;A7E2Y1	2;2	1;1	1;1	Myosin-7B	MYH7B	>tr|A0A087X0T3|A0A087X0T3_HUMAN Myosin-7B OS=Homo sapiens GN=MYH7B PE=1 SV=1;>sp|A7E2Y1|MYH7B_HUMAN Myosin-7B OS=Homo sapiens GN=MYH7B PE=1 SV=3	2	2	1	1	0	0	1	1	1	1	0	0	0	0	0	0	0	0	0	0	0	0	0	0	0	0	0	0	1	1	0	0	0	0	0	0	0	0	0	0	0	0
A0A087X0V5;P29728;A8KA41;F8W1C5;Q7Z6D0	A0A087X0V5;P29728;A8KA41	17;17;15;6;2	17;17;15;6;2	17;17;15;6;2	2-5-oligoadenylate synthase 2	OAS2	>tr|A0A087X0V5|A0A087X0V5_HUMAN 2-5-oligoadenylate synthase 2 OS=Homo sapiens GN=OAS2 PE=1 SV=1;>sp|P29728|OAS2_HUMAN 2-5-oligoadenylate synthase 2 OS=Homo sapiens GN=OAS2 PE=1 SV=3;>tr|A8KA41|A8KA41_HUMAN cDNA FLJ75060, highly similar to Homo sapiens	5	17	17	17	3	3	11	11	6	7	0	0	0	0	0	0	0	0	0	0	1	1	0	0	0	0	3	3	11	11	6	7	0	0	0	0	0	0	0	0	0	0
Q2TAM5;A0A087X0W8;Q04206;E9PKH5;B4E082;E9PI38;E9PQS6;Q96F54;E9PKV4;Q96CP1;A0A087WVP0;E9PMD5;E9PJR1;E9PRX2;E9PNV4	Q2TAM5;A0A087X0W8;Q04206;E9PKH5;B4E082;E9PI38;E9PQS6;Q96F54;E9PKV4;Q96CP1;A0A087WVP0	8;8;8;7;7;6;6;6;6;6;6;3;2;2;2	8;8;8;7;7;6;6;6;6;6;6;3;2;2;2	8;8;8;7;7;6;6;6;6;6;6;3;2;2;2	Transcription factor p65	RELA	>tr|Q2TAM5|Q2TAM5_HUMAN RELA protein OS=Homo sapiens GN=RELA PE=1 SV=1;>tr|A0A087X0W8|A0A087X0W8_HUMAN Transcription factor p65 OS=Homo sapiens GN=RELA PE=1 SV=1;>sp|Q04206|TF65_HUMAN Transcription factor p65 OS=Homo sapiens GN=RELA PE=1 SV=2;>tr|E9PKH5|E9	15	8	8	8	1	0	0	0	4	3	1	2	0	1	0	0	3	3	0	0	1	2	1	1	1	0	1	0	0	0	4	3	1	2	0	1	0	0	3	3	0	0
A0A087X0X3;P52272;Q7KYM9;Q59ES8;Q6P2D7;M0QZM1;M0QY96;M0R2I7;M0R2T0;Q8TCM5;M0R0Y6;M0QYQ7;M0R0N3;M0R019;B4DEG4	A0A087X0X3;P52272;Q7KYM9;Q59ES8;Q6P2D7	7;7;6;6;5;3;2;2;2;1;1;1;1;1;1	7;7;6;6;5;3;2;2;2;1;1;1;1;1;1	7;7;6;6;5;3;2;2;2;1;1;1;1;1;1	Heterogeneous nuclear ribonucleoprotein M	HNRNPM;ORF;HNRPM	>tr|A0A087X0X3|A0A087X0X3_HUMAN Heterogeneous nuclear ribonucleoprotein M OS=Homo sapiens GN=HNRNPM PE=1 SV=1;>sp|P52272|HNRPM_HUMAN Heterogeneous nuclear ribonucleoprotein M OS=Homo sapiens GN=HNRNPM PE=1 SV=3;>tr|Q7KYM9|Q7KYM9_HUMAN ORF protein OS=Homo s	15	7	7	7	0	0	1	0	2	1	0	0	1	1	0	0	3	3	0	0	0	0	0	0	0	0	0	0	1	0	2	1	0	0	1	1	0	0	3	3	0	0
J3KN36;A0A0G2JN29;A0A087X117;Q15155;P69849;Q5JPE7;A0A0G2JP90;A0A087WW46;Q1LZN2;H3BPS9;I3L0Q6;H3BTW1;H3BUC9	J3KN36;A0A0G2JN29;A0A087X117;Q15155;P69849;Q5JPE7;A0A0G2JP90;A0A087WW46;Q1LZN2	15;15;15;15;15;15;13;13;9;2;1;1;1	15;15;15;15;15;15;13;13;9;2;1;1;1	13;13;13;13;13;13;11;11;7;2;1;1;0	Nodal modulator 1;Nodal modulator 3;Nodal modulator 2	NOMO3;NOMO1;NOMO2	>tr|J3KN36|J3KN36_HUMAN Nodal modulator 3 OS=Homo sapiens GN=NOMO3 PE=1 SV=1;>tr|A0A0G2JN29|A0A0G2JN29_HUMAN Nodal modulator 1 OS=Homo sapiens GN=NOMO1 PE=1 SV=1;>tr|A0A087X117|A0A087X117_HUMAN Nodal modulator 1 OS=Homo sapiens GN=NOMO1 PE=1 SV=1;>sp|Q1515	13	15	15	13	1	1	4	5	7	7	2	1	1	1	1	2	2	2	0	0	6	6	2	3	2	3	1	1	4	5	7	7	2	1	1	1	1	2	2	2	0	0
A0A087X1G7;A0A0B4J1S4;O60613;A0A0J9YX89;D3DT21;A0A087WXL0;A0A0B4J1T0;A8MZD0	A0A087X1G7;A0A0B4J1S4;O60613	3;3;3;1;1;1;1;1	3;3;3;1;1;1;1;1	3;3;3;1;1;1;1;1	15 kDa selenoprotein	2017-09-15	>tr|A0A087X1G7|A0A087X1G7_HUMAN 15 kDa selenoprotein OS=Homo sapiens GN=SEP15 PE=1 SV=1;>tr|A0A0B4J1S4|A0A0B4J1S4_HUMAN 15 kDa selenoprotein OS=Homo sapiens GN=SEP15 PE=1 SV=1;>sp|O60613|SEP15_HUMAN 15 kDa selenoprotein OS=Homo sapiens GN=SEP15 PE=1 SV=3	8	3	3	3	0	0	1	1	1	1	0	0	1	1	0	0	0	0	0	0	1	1	0	0	1	1	0	0	1	1	1	1	0	0	1	1	0	0	0	0	0	0
A0A0U1RQT1;A0A087X1H5;Q15057;H7C3K3;H7C3Q8;Q96P50	A0A0U1RQT1;A0A087X1H5;Q15057;H7C3K3;H7C3Q8;Q96P50	2;2;2;1;1;1	2;2;2;1;1;1	2;2;2;1;1;1	Arf-GAP with coiled-coil, ANK repeat and PH domain-containing protein 2;Arf-GAP with coiled-coil, ANK repeat and PH domain-containing protein 3	ACAP2;ACAP3	>tr|A0A0U1RQT1|A0A0U1RQT1_HUMAN Arf-GAP with coiled-coil, ANK repeat and PH domain-containing protein 2 (Fragment) OS=Homo sapiens GN=ACAP2 PE=1 SV=1;>tr|A0A087X1H5|A0A087X1H5_HUMAN Arf-GAP with coiled-coil, ANK repeat and PH domain-containing protein 2 OS	6	2	2	2	0	0	1	1	0	0	0	0	0	0	0	0	0	1	0	0	0	0	0	0	0	0	0	0	1	1	0	0	0	0	0	0	0	0	0	1	0	0
A0A087X1J7;P22352;H0YBE4;E5RG32;H0YC19	A0A087X1J7;P22352	7;7;2;1;1	7;7;2;1;1	7;7;2;1;1	Glutathione peroxidase 3	GPX3	>tr|A0A087X1J7|A0A087X1J7_HUMAN Glutathione peroxidase OS=Homo sapiens GN=GPX3 PE=1 SV=1;>sp|P22352|GPX3_HUMAN Glutathione peroxidase 3 OS=Homo sapiens GN=GPX3 PE=1 SV=2	5	7	7	7	0	1	2	2	5	5	2	2	1	1	1	1	1	1	1	1	3	3	2	2	1	1	0	1	2	2	5	5	2	2	1	1	1	1	1	1	1	1
A0A087X1V8;Q7RTZ1	A0A087X1V8;Q7RTZ1	4;4	4;4	4;4	Ovochymase-2	OVCH2	>tr|A0A087X1V8|A0A087X1V8_HUMAN Ovochymase-2 OS=Homo sapiens GN=OVCH2 PE=1 SV=2;>sp|Q7RTZ1|OVCH2_HUMAN Ovochymase-2 OS=Homo sapiens GN=OVCH2 PE=3 SV=2	2	4	4	4	0	0	0	0	1	1	1	1	1	1	4	4	2	2	0	0	0	0	0	0	0	0	0	0	0	0	1	1	1	1	1	1	4	4	2	2	0	0
Q86SZ7;Q2TNB3;A0A087X1Z3;Q9UL46;H0YM70;Q6FHK9;H0YKU2	Q86SZ7;Q2TNB3;A0A087X1Z3;Q9UL46;H0YM70;Q6FHK9	10;10;10;10;9;9;3	10;10;10;10;9;9;3	10;10;10;10;9;9;3	Proteasome activator complex subunit 2	PSME2	>tr|Q86SZ7|Q86SZ7_HUMAN Full-length cDNA clone CS0DJ015YJ12 of T cells (Jurkat cell line) of Homo sapiens (human) OS=Homo sapiens GN=PSME2 PE=2 SV=1;>tr|Q2TNB3|Q2TNB3_HUMAN Cell migration-inducing protein 22 OS=Homo sapiens PE=2 SV=1;>tr|A0A087X1Z3|A0A087X	7	10	10	10	5	4	8	8	10	10	1	2	6	6	2	3	7	6	3	3	6	6	6	7	7	7	5	4	8	8	10	10	1	2	6	6	2	3	7	6	3	3
A0A087X211;Q8TCG1	A0A087X211;Q8TCG1	2;2	2;2	2;2	Protein CIP2A	KIAA1524	>tr|A0A087X211|A0A087X211_HUMAN Protein CIP2A OS=Homo sapiens GN=KIAA1524 PE=1 SV=1;>sp|Q8TCG1|CIP2A_HUMAN Protein CIP2A OS=Homo sapiens GN=KIAA1524 PE=1 SV=2	2	2	2	2	0	1	1	1	1	1	0	0	0	0	0	0	0	0	0	0	0	0	0	0	0	0	0	1	1	1	1	1	0	0	0	0	0	0	0	0	0	0
A0A087X271;H3BVI6;B4DN57;B4DDF4;Q6FHE4;Q6FHC3;B4DUT8;Q99439;K7ES69;A0A087X1X5;B4DHU5;Q53GK7;A0A087WV51;H3BQH0	A0A087X271;H3BVI6;B4DN57;B4DDF4;Q6FHE4;Q6FHC3;B4DUT8;Q99439;K7ES69;A0A087X1X5;B4DHU5;Q53GK7	3;3;3;3;3;3;3;3;2;2;2;2;1;1	3;3;3;3;3;3;3;3;2;2;2;2;1;1	3;3;3;3;3;3;3;3;2;2;2;2;1;1	Calponin-2	CNN2	>tr|A0A087X271|A0A087X271_HUMAN Calponin (Fragment) OS=Homo sapiens GN=CNN2 PE=1 SV=1;>tr|H3BVI6|H3BVI6_HUMAN Calponin (Fragment) OS=Homo sapiens GN=CNN2 PE=1 SV=1;>tr|B4DN57|B4DN57_HUMAN Calponin OS=Homo sapiens PE=2 SV=1;>tr|B4DDF4|B4DDF4_HUMAN Calponin	14	3	3	3	1	1	1	1	1	1	0	0	2	2	0	0	2	2	2	2	1	1	2	2	3	3	1	1	1	1	1	1	0	0	2	2	0	0	2	2	2	2
A0A087X2B5;B4DY23;Q54A51;P35613;A0A087WUV8;B4DNE1;I3L192;R4GMX5;R4GN83;A8MZ77	A0A087X2B5;B4DY23;Q54A51;P35613;A0A087WUV8;B4DNE1;I3L192;R4GMX5	6;6;6;6;5;5;4;3;2;1	6;6;6;6;5;5;4;3;2;1	6;6;6;6;5;5;4;3;2;1	Basigin	hEMMPRIN;BSG	>tr|A0A087X2B5|A0A087X2B5_HUMAN Basigin (Fragment) OS=Homo sapiens GN=BSG PE=1 SV=1;>tr|B4DY23|B4DY23_HUMAN cDNA FLJ61188, highly similar to Basigin OS=Homo sapiens PE=2 SV=1;>tr|Q54A51|Q54A51_HUMAN Basigin (Ok blood group), isoform CRA_a OS=Homo sapiens G	10	6	6	6	0	0	4	4	2	2	3	2	3	2	2	2	4	4	3	3	1	1	1	1	2	2	0	0	4	4	2	2	3	2	3	2	2	2	4	4	3	3
A0A087X2D8;O60271;B4DS36;H0YBE9;Q7Z5Q8;Q719J0;Q5JB53;A0A060L980	A0A087X2D8;O60271;B4DS36	6;6;4;2;2;2;2;1	6;6;4;2;2;2;2;1	6;6;4;2;2;2;2;1	C-Jun-amino-terminal kinase-interacting protein 4	SPAG9	>tr|A0A087X2D8|A0A087X2D8_HUMAN C-Jun-amino-terminal kinase-interacting protein 4 OS=Homo sapiens GN=SPAG9 PE=1 SV=1;>sp|O60271|JIP4_HUMAN C-Jun-amino-terminal kinase-interacting protein 4 OS=Homo sapiens GN=SPAG9 PE=1 SV=4;>tr|B4DS36|B4DS36_HUMAN cDNA FLJ	8	6	6	6	0	0	0	1	1	1	0	0	1	0	0	0	3	3	2	2	0	0	0	0	1	0	0	0	0	1	1	1	0	0	1	0	0	0	3	3	2	2
V9HW24;A0A087X2I1;P62333;H0YJC0;H0YJS8;H0YJX2;B4DR91;H0YJE9;H0YJT1	V9HW24;A0A087X2I1;P62333	18;18;18;8;6;5;4;1;1	18;18;18;8;6;5;4;1;1	18;18;18;8;6;5;4;1;1	26S protease regulatory subunit 10B	HEL-S-73;PSMC6	>tr|V9HW24|V9HW24_HUMAN Epididymis secretory protein Li 73 OS=Homo sapiens GN=HEL-S-73 PE=2 SV=1;>tr|A0A087X2I1|A0A087X2I1_HUMAN 26S protease regulatory subunit 10B OS=Homo sapiens GN=PSMC6 PE=1 SV=1;>sp|P62333|PRS10_HUMAN 26S protease regulatory subunit 1	9	18	18	18	6	6	7	7	15	16	2	2	7	7	1	1	11	9	3	3	7	7	5	5	5	6	6	6	7	7	15	16	2	2	7	7	1	1	11	9	3	3
B4DZ60;A0A088AWN0;Q6N0B2;P17707;F6R5I9;Q5VXN5	B4DZ60;A0A088AWN0;Q6N0B2;P17707;F6R5I9	3;3;3;3;2;1	3;3;3;3;2;1	3;3;3;3;2;1	S-adenosylmethionine decarboxylase proenzyme;S-adenosylmethionine decarboxylase proenzyme;S-adenosylmethionine decarboxylase alpha chain;S-adenosylmethionine decarboxylase beta chain	AMD1;DKFZp686G18136	>tr|B4DZ60|B4DZ60_HUMAN S-adenosylmethionine decarboxylase proenzyme OS=Homo sapiens GN=AMD1 PE=1 SV=1;>tr|A0A088AWN0|A0A088AWN0_HUMAN cDNA FLJ52754, highly similar to S-adenosylmethionine decarboxylase proenzyme (EC 4.1.1.50) OS=Homo sapiens PE=2 SV=1;>tr	6	3	3	3	0	0	2	1	1	1	1	1	2	1	1	0	1	1	2	2	1	1	1	1	2	1	0	0	2	1	1	1	1	1	2	1	1	0	1	1	2	2
B9EG73;B7ZVX0;A0A088AWN3;A0A0A0MSY4;Q9BZ29;A6H8Z6;A0A0A0MT38;Q6ZSL5;A0A0D9SFH5;Q7Z6H4;B3KXE2;H0Y3S1;B7Z2J2;B7Z2D0;Q68CY0;B7Z6G9;B7Z6H5;B7Z2G6;H7BZ79;Q5JUD8	B9EG73;B7ZVX0;A0A088AWN3;A0A0A0MSY4;Q9BZ29;A6H8Z6;A0A0A0MT38;Q6ZSL5	10;10;10;10;10;8;8;8;3;2;2;2;2;2;2;2;2;2;1;1	10;10;10;10;10;8;8;8;3;2;2;2;2;2;2;2;2;2;1;1	10;10;10;10;10;8;8;8;3;2;2;2;2;2;2;2;2;2;1;1	Dedicator of cytokinesis protein 9	DOCK9	>tr|B9EG73|B9EG73_HUMAN DOCK9 protein OS=Homo sapiens GN=DOCK9 PE=2 SV=1;>tr|B7ZVX0|B7ZVX0_HUMAN DOCK9 protein OS=Homo sapiens GN=DOCK9 PE=2 SV=1;>tr|A0A088AWN3|A0A088AWN3_HUMAN Dedicator of cytokinesis protein 9 OS=Homo sapiens GN=DOCK9 PE=1 SV=2;>tr|A0A0	20	10	10	10	0	0	0	1	5	4	0	0	0	0	0	0	2	2	1	1	1	1	5	4	0	0	0	0	0	1	5	4	0	0	0	0	0	0	2	2	1	1
G8XWS8;D6RTK6;A0A088AWP5;Q8WUY3;X6R9J3;H7BZH9;B9EK61;E9PDC2;Q5JUB9;B4DSQ3;B4DJW7;Q5JUB8;A0A024R220;G8XWS9;A0A0C4DFM3;A0A0S2Z5Y8;A0A0S2Z5T8;B4DS11;Q86WG3	G8XWS8;D6RTK6;A0A088AWP5;Q8WUY3;X6R9J3;H7BZH9;B9EK61;E9PDC2	6;6;6;6;3;3;3;3;2;2;2;2;2;2;1;1;1;1;1	6;6;6;6;3;3;3;3;2;2;2;2;2;2;1;1;1;1;1	6;6;6;6;3;3;3;3;2;2;2;2;2;2;1;1;1;1;1	Protein prune homolog 2	PRUNE2	>tr|G8XWS8|G8XWS8_HUMAN PRUNE2 OS=Homo sapiens GN=PRUNE2 PE=2 SV=1;>tr|D6RTK6|D6RTK6_HUMAN Prune homolog 2 OS=Homo sapiens GN=PRUNE2 PE=2 SV=1;>tr|A0A088AWP5|A0A088AWP5_HUMAN Protein prune homolog 2 OS=Homo sapiens GN=PRUNE2 PE=1 SV=1;>sp|Q8WUY3|PRUN2_HUMA	19	6	6	6	0	1	2	2	2	2	2	2	0	1	0	0	6	6	4	3	0	0	1	1	2	3	0	1	2	2	2	2	2	2	0	1	0	0	6	6	4	3
B2RCH4;A0A090N7T7;Q9UHC6;X5DNH4;X5D9M6;Q86UL9;A0A0D9SES4;Q75MQ9;X5D8X9;B7Z3Z3;Q75MA1;Q75MF8;O75852	B2RCH4;A0A090N7T7;Q9UHC6;X5DNH4	10;10;10;9;4;3;3;2;2;2;1;1;1	10;10;10;9;4;3;3;2;2;2;1;1;1	10;10;10;9;4;3;3;2;2;2;1;1;1	Contactin-associated protein-like 2	CNTNAP2	>tr|B2RCH4|B2RCH4_HUMAN cDNA, FLJ96073, highly similar to Homo sapiens contactin associated protein-like 2 (CNTNAP2), mRNA OS=Homo sapiens PE=2 SV=1;>tr|A0A090N7T7|A0A090N7T7_HUMAN Contactin associated protein-like 2 OS=Homo sapiens GN=CNTNAP2 PE=4 SV=1;>s	13	10	10	10	0	0	0	0	0	0	1	1	0	0	0	0	3	4	1	1	5	5	3	2	5	6	0	0	0	0	0	0	1	1	0	0	0	0	3	4	1	1
A0A090N7T9;Q12765;A0A024RA21;C9K052;B8ZZP4;C9J7U9;B4DE46	A0A090N7T9;Q12765;A0A024RA21	15;15;12;5;3;3;3	15;15;12;5;3;3;3	4;4;1;4;3;3;3	Secernin-1	SCRN1	>tr|A0A090N7T9|A0A090N7T9_HUMAN Secernin 1 OS=Homo sapiens GN=SCRN1 PE=4 SV=1;>sp|Q12765|SCRN1_HUMAN Secernin-1 OS=Homo sapiens GN=SCRN1 PE=1 SV=2;>tr|A0A024RA21|A0A024RA21_HUMAN Secernin 1, isoform CRA_a OS=Homo sapiens GN=SCRN1 PE=4 SV=1	7	15	15	4	2	2	7	7	6	6	0	1	8	8	1	1	10	10	3	3	5	5	7	7	8	7	2	2	7	7	6	6	0	1	8	8	1	1	10	10	3	3
A0A0C4DGX4;A0A090N7U0;Q13616;B3KTW0;B4DLA3;Q75MQ1;B3KU45	A0A0C4DGX4;A0A090N7U0;Q13616;B3KTW0;B4DLA3;Q75MQ1	6;6;6;5;4;3;2	6;6;6;5;4;3;2	6;6;6;5;4;3;2	Cullin-1	CUL1	>tr|A0A0C4DGX4|A0A0C4DGX4_HUMAN Cullin-1 OS=Homo sapiens GN=CUL1 PE=1 SV=1;>tr|A0A090N7U0|A0A090N7U0_HUMAN Cullin 1 OS=Homo sapiens GN=CUL1 PE=3 SV=1;>sp|Q13616|CUL1_HUMAN Cullin-1 OS=Homo sapiens GN=CUL1 PE=1 SV=2;>tr|B3KTW0|B3KTW0_HUMAN cDNA FLJ38844 fis	7	6	6	6	0	0	1	1	2	3	0	0	1	1	0	0	2	3	0	0	0	1	0	0	1	0	0	0	1	1	2	3	0	0	1	1	0	0	2	3	0	0
A0A090N7U9;Q99969;C9J8S2	A0A090N7U9;Q99969;C9J8S2	2;2;1	2;2;1	2;2;1	Retinoic acid receptor responder protein 2	RARRES2	>tr|A0A090N7U9|A0A090N7U9_HUMAN Retinoic acid receptor responder (Tazarotene induced) 2 OS=Homo sapiens GN=RARRES2 PE=4 SV=1;>sp|Q99969|RARR2_HUMAN Retinoic acid receptor responder protein 2 OS=Homo sapiens GN=RARRES2 PE=1 SV=1;>tr|C9J8S2|C9J8S2_HUMAN Reti	3	2	2	2	0	0	0	0	0	0	1	1	0	0	0	0	0	0	0	0	0	0	0	0	1	1	0	0	0	0	0	0	1	1	0	0	0	0	0	0	0	0
A0A090N7V5;O75223;M0QZK8;B3KMN7;B8ZZK2;H7BZK5;A0A0B4J1Y4	A0A090N7V5;O75223;M0QZK8;B3KMN7;B8ZZK2	9;9;6;5;5;3;2	9;9;6;5;5;3;2	9;9;6;5;5;3;2	Gamma-glutamylcyclotransferase	GGCT	>tr|A0A090N7V5|A0A090N7V5_HUMAN Chromosome 7 open reading frame 24 OS=Homo sapiens GN=C7orf24 PE=4 SV=1;>sp|O75223|GGCT_HUMAN Gamma-glutamylcyclotransferase OS=Homo sapiens GN=GGCT PE=1 SV=1;>tr|M0QZK8|M0QZK8_HUMAN Uncharacterized protein OS=Homo sapiens P	7	9	9	9	2	2	4	4	4	4	2	2	3	2	2	2	3	3	1	1	2	2	3	3	5	3	2	2	4	4	4	4	2	2	3	2	2	2	3	3	1	1
A0A090N7W4;Q00535;Q6IAW3;A0A0S2Z355;F8VXD2;B3KX76;K7ELV5;F8VYH9;F8VZZ0;E5RIU6;F8VTV8;F8VWX7;F8VZ51;K7EJ83;A0A087WZZ9;I6L9I5;Q6LC83;Q8IWB3;E7ESI2;B4DDL9;H0YAZ9;A0A024RB10;Q9BWF9;A0A024QZP7;A0A024RB77;Q5H9N4;A0A024RBB6;Q9BVE2;A0A024R8R3;E7EUK8;B4DK59;G3V5T9;B5BU53;B2R9L6;A0A024R880;B4DHU6;B4DER5;A0A087X209;Q59G02;A0A024R996;B4DK03;A0A024R980;J3QSD7;A0A024RA66;A0A024RA85;P06493;P24941;P11802;Q00526;…	A0A090N7W4;Q00535;Q6IAW3;A0A0S2Z355	6;6;5;4;1;1;1;1;1;1;1;1;1;1;1;1;1;1;1;1;1;1;1;1;1;1;1;1;1;1;1;1;1;1;1;1;1;1;1;1;1;1;1;1;1;1;1;1;1;1;1;1;1;1;1;1	6;6;5;4;1;1;1;1;1;1;1;1;1;1;1;1;1;1;1;1;1;1;1;1;1;1;1;1;1;1;1;1;1;1;1;1;1;1;1;1;1;1;1;1;1;1;1;1;1;1;1;1;1;1;1;1	5;5;4;3;0;0;0;0;0;0;0;0;0;0;0;0;0;0;0;0;0;0;0;0;0;0;0;0;0;0;0;0;0;0;0;0;0;0;0;0;0;0;0;0;0;0;0;0;0;0;0;0;0;0;0;0	Cyclin-dependent-like kinase 5	CDK5	>tr|A0A090N7W4|A0A090N7W4_HUMAN Cyclin-dependent kinase 5 OS=Homo sapiens GN=CDK5 PE=2 SV=1;>sp|Q00535|CDK5_HUMAN Cyclin-dependent-like kinase 5 OS=Homo sapiens GN=CDK5 PE=1 SV=3;>tr|Q6IAW3|Q6IAW3_HUMAN CDK5 protein OS=Homo sapiens GN=CDK5 PE=2 SV=1;>tr|A0	56	6	6	5	0	0	2	2	3	3	1	1	2	2	0	0	2	1	1	1	1	1	2	3	1	1	0	0	2	2	3	3	1	1	2	2	0	0	2	1	1	1
A0A090N8G0;P41250;Q75MN1	A0A090N8G0;P41250	14;13;2	14;13;2	14;13;2	Glycine--tRNA ligase	GARS	>tr|A0A090N8G0|A0A090N8G0_HUMAN Glycyl-tRNA synthetase OS=Homo sapiens GN=GARS PE=4 SV=1;>sp|P41250|SYG_HUMAN Glycine--tRNA ligase OS=Homo sapiens GN=GARS PE=1 SV=3	3	14	14	14	2	2	6	5	8	8	5	4	5	4	1	1	9	9	2	2	4	4	3	3	5	5	2	2	6	5	8	8	5	4	5	4	1	1	9	9	2	2
A0A090N8Q5;H3BM14;H3BM74;Q9Y5A7;H7C5E1;C9J7X7;H7C5N1;C9JRT6;F8WDB6	A0A090N8Q5;H3BM14;H3BM74;Q9Y5A7;H7C5E1;C9J7X7;H7C5N1;C9JRT6;F8WDB6	2;2;2;2;1;1;1;1;1	2;2;2;2;1;1;1;1;1	2;2;2;2;1;1;1;1;1	NEDD8 ultimate buster 1	NUB1	>tr|A0A090N8Q5|A0A090N8Q5_HUMAN NEDD8 ultimate buster-1 OS=Homo sapiens GN=NYREN18 PE=4 SV=1;>tr|H3BM14|H3BM14_HUMAN NEDD8 ultimate buster 1 OS=Homo sapiens GN=NUB1 PE=1 SV=1;>tr|H3BM74|H3BM74_HUMAN NEDD8 ultimate buster 1 OS=Homo sapiens GN=NUB1 PE=1 SV=1	9	2	2	2	0	0	0	0	0	0	0	0	0	0	0	0	0	0	0	0	0	0	0	0	1	1	0	0	0	0	0	0	0	0	0	0	0	0	0	0	0	0
A0A090N8Y2;P13667;C9JMN9	A0A090N8Y2;P13667	16;16;1	16;16;1	16;16;1	Protein disulfide-isomerase A4	PDIA4	>tr|A0A090N8Y2|A0A090N8Y2_HUMAN Protein disulfide-isomerase A4 OS=Homo sapiens GN=ERP70 PE=2 SV=1;>sp|P13667|PDIA4_HUMAN Protein disulfide-isomerase A4 OS=Homo sapiens GN=PDIA4 PE=1 SV=2	3	16	16	16	2	2	3	2	8	10	2	1	4	4	3	3	6	7	3	3	3	2	1	0	0	0	2	2	3	2	8	10	2	1	4	4	3	3	6	7	3	3
Q6NZ61;A8K005;A0A090N900;Q15382;C9J931;F8WBL3	Q6NZ61;A8K005;A0A090N900;Q15382;C9J931	6;6;6;6;4;1	6;6;6;6;4;1	6;6;6;6;4;1	GTP-binding protein Rheb	RHEB	>tr|Q6NZ61|Q6NZ61_HUMAN Ras homolog enriched in brain OS=Homo sapiens GN=RHEB PE=2 SV=1;>tr|A8K005|A8K005_HUMAN cDNA FLJ77896, highly similar to Homo sapiens Ras homolog enriched in brain (RHEB), mRNA OS=Homo sapiens PE=2 SV=1;>tr|A0A090N900|A0A090N900_HUM	6	6	6	6	3	1	4	4	4	4	0	0	2	2	0	0	4	4	1	1	5	5	4	4	4	4	3	1	4	4	4	4	0	0	2	2	0	0	4	4	1	1
A0A096LNH6;Q14185;B2RUU3	A0A096LNH6;Q14185;B2RUU3	4;4;3	2;2;2	2;2;2	Dedicator of cytokinesis protein 1	DOCK1	>tr|A0A096LNH6|A0A096LNH6_HUMAN Dedicator of cytokinesis protein 1 OS=Homo sapiens GN=DOCK1 PE=1 SV=1;>sp|Q14185|DOCK1_HUMAN Dedicator of cytokinesis protein 1 OS=Homo sapiens GN=DOCK1 PE=1 SV=2;>tr|B2RUU3|B2RUU3_HUMAN Dedicator of cytokinesis 1 OS=Homo sa	3	4	2	2	0	0	0	0	1	1	0	0	1	1	0	0	2	3	0	0	0	0	0	0	0	0	0	0	0	0	0	0	0	0	0	0	0	0	2	2	0	0
A0A096LNW1;A0A096LNL9;A4LAA3;P46100;B7Z1D8	A0A096LNW1;A0A096LNL9;A4LAA3;P46100;B7Z1D8	2;2;2;2;1	2;2;2;2;1	2;2;2;2;1	Transcriptional regulator ATRX	ATRX	>tr|A0A096LNW1|A0A096LNW1_HUMAN Transcriptional regulator ATRX (Fragment) OS=Homo sapiens GN=ATRX PE=1 SV=1;>tr|A0A096LNL9|A0A096LNL9_HUMAN Transcriptional regulator ATRX (Fragment) OS=Homo sapiens GN=ATRX PE=1 SV=1;>tr|A4LAA3|A4LAA3_HUMAN Alpha thalassemi	5	2	2	2	0	0	0	0	0	0	1	1	0	0	0	0	0	0	0	0	1	1	0	0	0	0	0	0	0	0	0	0	1	1	0	0	0	0	0	0	0	0
Q9NSV7;A0A096LNU2;Q7Z3N4;A0A096LP26;A0A096LP75;C4AMC7;Q6VEQ5;A8K0Z3;A9QQ21;A9QQ20;A9QQ18;A9QQ17;A9QQ16;A9QQ15;A9QQ14;A9QQ13;A9QQ12;A9QQ23;A9QQ22;Q9NQA3;A8MWX3;Q9H7J9;B4DHT3;A9QQ19;B4DXR4;B4DTD2;B4DJQ2;B4DG24;Q86WN0;Q6VEQ4;A8K6B7;A8K222	Q9NSV7;A0A096LNU2;Q7Z3N4;A0A096LP26;A0A096LP75;C4AMC7;Q6VEQ5;A8K0Z3;A9QQ21;A9QQ20;A9QQ18;A9QQ17;A9QQ16;A9QQ15;A9QQ14;A9QQ13;A9QQ12;A9QQ23;A9QQ22;Q9NQA3;A8MWX3;Q9H7J9;B4DHT3;A9QQ19	4;4;4;4;4;4;4;4;3;3;3;3;3;3;3;3;3;3;3;3;3;2;2;2;1;1;1;1;1;1;1;1	4;4;4;4;4;4;4;4;3;3;3;3;3;3;3;3;3;3;3;3;3;2;2;2;1;1;1;1;1;1;1;1	4;4;4;4;4;4;4;4;3;3;3;3;3;3;3;3;3;3;3;3;3;2;2;2;1;1;1;1;1;1;1;1	Putative WAS protein family homolog 3;WAS protein family homolog 2;WAS protein family homolog 1;WAS protein family homolog 6;Putative WAS protein family homolog 4	DKFZp434K1323;DKFZp686C24272;WASH3P;WASH2P;WASH1;WASH;WASH6P;WASH4P;FLJ00075	>tr|Q9NSV7|Q9NSV7_HUMAN Putative uncharacterized protein DKFZp434K1323 OS=Homo sapiens GN=DKFZp434K1323 PE=2 SV=2;>tr|A0A096LNU2|A0A096LNU2_HUMAN Uncharacterized protein OS=Homo sapiens PE=4 SV=1;>tr|Q7Z3N4|Q7Z3N4_HUMAN Putative uncharacterized protein DKF	32	4	4	4	1	1	0	0	1	1	0	0	1	1	0	0	2	2	0	0	1	1	0	0	1	2	1	1	0	0	1	1	0	0	1	1	0	0	2	2	0	0
A0A096LNV3;A0A096LP02;Q9Y508;H0UI65;B4DLW5	A0A096LNV3;A0A096LP02;Q9Y508;H0UI65;B4DLW5	3;3;3;2;2	3;3;3;2;2	3;3;3;2;2	E3 ubiquitin-protein ligase RNF114	RNF114;ZNF313	>tr|A0A096LNV3|A0A096LNV3_HUMAN E3 ubiquitin-protein ligase RNF114 (Fragment) OS=Homo sapiens GN=RNF114 PE=1 SV=1;>tr|A0A096LP02|A0A096LP02_HUMAN E3 ubiquitin-protein ligase RNF114 OS=Homo sapiens GN=RNF114 PE=1 SV=1;>sp|Q9Y508|RN114_HUMAN E3 ubiquitin-pro	5	3	3	3	0	0	1	1	1	0	0	0	0	0	0	0	2	2	1	1	1	1	0	0	0	0	0	0	1	1	1	0	0	0	0	0	0	0	2	2	1	1
A0A096LP10;A0A087WT15;A0A096LNL2	A0A096LP10	3;1;1	1;1;0	1;1;0			>tr|A0A096LP10|A0A096LP10_HUMAN Putative bifunctional UDP-N-acetylglucosamine transferase and deubiquitinase ALG13 (Fragment) OS=Homo sapiens GN=ALG13 PE=1 SV=1	3	3	1	1	0	0	1	1	1	1	0	0	0	0	0	0	1	1	0	0	1	0	1	1	1	1	0	0	0	0	0	0	0	0	0	0	0	0	0	0	0	0
A8K2B4;A0A097PID1;A0A097PIC4;A0A0U1RRM6;Q8N8S7;Q6ZT55;Q6ZSB8;A0A075B6E5;A0A0U1RQP7	A8K2B4;A0A097PID1;A0A097PIC4;A0A0U1RRM6;Q8N8S7;Q6ZT55	3;3;3;3;3;2;1;1;1	3;3;3;3;3;2;1;1;1	3;3;3;3;3;2;1;1;1	Protein enabled homolog	ENAH	>tr|A8K2B4|A8K2B4_HUMAN cDNA FLJ77490, highly similar to Homo sapiens enabled homolog (Drosophila) (ENAH), transcript variant 2, mRNA OS=Homo sapiens PE=2 SV=1;>tr|A0A097PID1|A0A097PID1_HUMAN Mammalian enabled variant pan OS=Homo sapiens GN=ENAH PE=2 SV=1;	9	3	3	3	0	0	0	1	0	0	0	1	0	0	0	0	1	0	0	0	0	0	1	0	2	2	0	0	0	1	0	0	0	1	0	0	0	0	1	0	0	0
A0A0A0MQS1;Q53H96;D3DWK4;B5MD87;B4DI71;B4DGI7;A0A087WTU2	A0A0A0MQS1;Q53H96;D3DWK4;B5MD87;B4DI71;B4DGI7	6;6;5;4;4;3;1	6;6;5;4;4;3;1	6;6;5;4;4;3;1	Pyrroline-5-carboxylate reductase 3;Pyrroline-5-carboxylate reductase	PYCRL	>tr|A0A0A0MQS1|A0A0A0MQS1_HUMAN Pyrroline-5-carboxylate reductase OS=Homo sapiens GN=PYCRL PE=1 SV=1;>sp|Q53H96|P5CR3_HUMAN Pyrroline-5-carboxylate reductase 3 OS=Homo sapiens GN=PYCRL PE=1 SV=3;>tr|D3DWK4|D3DWK4_HUMAN Pyrroline-5-carboxylate reductase OS=	7	6	6	6	0	0	1	1	4	4	0	0	0	1	0	0	1	1	1	1	0	0	0	0	3	3	0	0	1	1	4	4	0	0	0	1	0	0	1	1	1	1
A0A0A0MQX7;Q08629;D3DQB3;O60400;D6RAM7;D6RB21	A0A0A0MQX7;Q08629;D3DQB3	13;13;10;4;2;2	13;13;10;4;2;2	12;12;9;4;2;2	Testican-1	SPOCK1	>tr|A0A0A0MQX7|A0A0A0MQX7_HUMAN Testican-1 OS=Homo sapiens GN=SPOCK1 PE=1 SV=1;>sp|Q08629|TICN1_HUMAN Testican-1 OS=Homo sapiens GN=SPOCK1 PE=1 SV=1;>tr|D3DQB3|D3DQB3_HUMAN Sparc/osteonectin, cwcv and kazal-like domains proteoglycan (Testican) 1, isoform C	6	13	13	12	4	3	4	4	7	7	7	8	7	7	1	1	9	9	6	6	7	6	4	5	7	6	4	3	4	4	7	7	7	8	7	7	1	1	9	9	6	6
H3BM50;H3BPU5;B4E2R3;H3BR25;H3BPT1;H3BN58;H3BSZ4;A0A0A0MR05;Q9BVC4;H3BQ74;I3L2E7;H3BR38	H3BM50;H3BPU5;B4E2R3;H3BR25;H3BPT1;H3BN58;H3BSZ4;A0A0A0MR05;Q9BVC4;H3BQ74;I3L2E7;H3BR38	2;2;2;2;2;2;2;2;2;1;1;1	2;2;2;2;2;2;2;2;2;1;1;1	2;2;2;2;2;2;2;2;2;1;1;1	Target of rapamycin complex subunit LST8	MLST8	>tr|H3BM50|H3BM50_HUMAN Target of rapamycin complex subunit LST8 OS=Homo sapiens GN=MLST8 PE=1 SV=1;>tr|H3BPU5|H3BPU5_HUMAN Target of rapamycin complex subunit LST8 OS=Homo sapiens GN=MLST8 PE=1 SV=1;>tr|B4E2R3|B4E2R3_HUMAN cDNA FLJ58875, highly similar to	12	2	2	2	0	0	0	0	1	1	0	0	0	0	0	0	1	1	1	1	0	0	0	0	0	0	0	0	0	0	1	1	0	0	0	0	0	0	1	1	1	1
Q5T093;Q5T092;A0A0A0MR06;Q5T091;Q6IBJ7;Q5T094;Q9P0H9;O15258	Q5T093;Q5T092;A0A0A0MR06;Q5T091;Q6IBJ7;Q5T094;Q9P0H9;O15258	2;2;2;2;2;2;2;2	2;2;2;2;2;2;2;2	2;2;2;2;2;2;2;2	Protein RER1	RER1	>tr|Q5T093|Q5T093_HUMAN Protein RER1 OS=Homo sapiens GN=RER1 PE=1 SV=1;>tr|Q5T092|Q5T092_HUMAN Protein RER1 (Fragment) OS=Homo sapiens GN=RER1 PE=1 SV=1;>tr|A0A0A0MR06|A0A0A0MR06_HUMAN Protein RER1 (Fragment) OS=Homo sapiens GN=RER1 PE=1 SV=1;>tr|Q5T091|Q5	8	2	2	2	0	0	0	0	2	2	0	0	0	0	0	0	0	0	0	0	0	0	0	0	0	0	0	0	0	0	2	2	0	0	0	0	0	0	0	0	0	0
Q6IQ43;A0A0A0MR09;P43378	Q6IQ43;A0A0A0MR09;P43378	2;2;2	2;2;2	2;2;2	Tyrosine-protein phosphatase non-receptor type 9	PTPN9	>tr|Q6IQ43|Q6IQ43_HUMAN PTPN9 protein OS=Homo sapiens GN=PTPN9 PE=2 SV=1;>tr|A0A0A0MR09|A0A0A0MR09_HUMAN Tyrosine-protein phosphatase non-receptor type 9 OS=Homo sapiens GN=PTPN9 PE=1 SV=1;>sp|P43378|PTN9_HUMAN Tyrosine-protein phosphatase non-receptor typ	3	2	2	2	0	0	0	0	0	0	0	0	1	1	0	0	0	0	1	1	1	1	0	1	0	0	0	0	0	0	0	0	0	0	1	1	0	0	0	0	1	1
A0A0A0MRB5;Q8WXG6;F8W8U2;C9J6B0;A0A0U1RR25;C9JM97;C9JLZ9;C9K0L0	A0A0A0MRB5;Q8WXG6	25;24;5;3;3;1;1;1	25;24;5;3;3;1;1;1	25;24;5;3;3;1;1;1	MAP kinase-activating death domain protein	MADD	>tr|A0A0A0MRB5|A0A0A0MRB5_HUMAN MAP kinase-activating death domain protein OS=Homo sapiens GN=MADD PE=1 SV=1;>sp|Q8WXG6|MADD_HUMAN MAP kinase-activating death domain protein OS=Homo sapiens GN=MADD PE=1 SV=2	8	25	25	25	4	3	9	11	13	15	3	3	4	3	1	0	14	14	5	5	4	3	5	6	8	9	4	3	9	11	13	15	3	3	4	3	1	0	14	14	5	5
A8K885;A0A0A0MRI2;Q9UNH7;B4DJS7;Q5QTQ6;G3V5X9;H0YJF8;G3V4Z5;A0A0A0MT48;G3V5U2;A8KA24;A8K9F4;Q9P1Q0	A8K885;A0A0A0MRI2;Q9UNH7;B4DJS7;Q5QTQ6	12;12;12;10;9;4;2;2;1;1;1;1;1	11;11;11;10;9;3;1;1;1;1;1;1;1	11;11;11;10;9;3;1;1;1;1;1;1;1	Sorting nexin-6;Sorting nexin-6, N-terminally processed	SNX6	>tr|A8K885|A8K885_HUMAN Sorting nexin OS=Homo sapiens PE=2 SV=1;>tr|A0A0A0MRI2|A0A0A0MRI2_HUMAN Sorting nexin OS=Homo sapiens GN=SNX6 PE=1 SV=1;>sp|Q9UNH7|SNX6_HUMAN Sorting nexin-6 OS=Homo sapiens GN=SNX6 PE=1 SV=1;>tr|B4DJS7|B4DJS7_HUMAN Sorting nexin 6,	13	12	11	11	2	2	3	4	5	6	2	2	3	4	0	0	4	4	2	2	3	2	4	4	5	4	1	2	3	4	5	6	2	2	3	4	0	0	4	4	2	2
A0A0A0MRJ6;H7BY58;P22061;F6S8N6;B7Z972;C9J0F2;F8WDT3;F8WAV5;F8WAX2;H7C4X2	A0A0A0MRJ6;H7BY58;P22061;F6S8N6;B7Z972	15;15;15;14;12;4;4;4;4;1	15;15;15;14;12;4;4;4;4;1	15;15;15;14;12;4;4;4;4;1	Protein-L-isoaspartate O-methyltransferase;Protein-L-isoaspartate(D-aspartate) O-methyltransferase	PCMT1	>tr|A0A0A0MRJ6|A0A0A0MRJ6_HUMAN Protein-L-isoaspartate O-methyltransferase OS=Homo sapiens GN=PCMT1 PE=1 SV=1;>tr|H7BY58|H7BY58_HUMAN Protein-L-isoaspartate O-methyltransferase OS=Homo sapiens GN=PCMT1 PE=1 SV=1;>sp|P22061|PIMT_HUMAN Protein-L-isoaspartate	10	15	15	15	5	5	7	7	7	7	3	3	7	7	3	3	6	4	4	5	5	4	5	5	8	10	5	5	7	7	7	7	3	3	7	7	3	3	6	4	4	5
A0A0A0MRM8;Q5JVM0	A0A0A0MRM8	45;2	45;2	1;0			>tr|A0A0A0MRM8|A0A0A0MRM8_HUMAN Unconventional myosin-VI OS=Homo sapiens GN=MYO6 PE=1 SV=1	2	45	45	1	11	14	20	22	30	28	10	10	13	15	4	3	26	27	10	9	9	11	19	18	24	22	11	14	20	22	30	28	10	10	13	15	4	3	26	27	10	9
A0A0A0MRT6;Q59G41;Q8IZP0;B6VEX5;B6VEX4;B6VEX3;B4DKX2;B7Z9E9;B7Z836;B4DG63;B7ZAM8;B4DSH8;B4DMM5;H0Y6B5;Q13802;Q53SH3;B7Z617;B7Z5L1;B7Z612	A0A0A0MRT6;Q59G41;Q8IZP0;B6VEX5;B6VEX4;B6VEX3	11;11;11;10;10;10;4;3;3;1;1;1;1;1;1;1;1;1;1	11;11;11;10;10;10;4;3;3;1;1;1;1;1;1;1;1;1;1	6;6;6;5;5;5;3;2;0;0;0;0;0;0;0;0;0;0;0	Abl interactor 1	ABI1	>tr|A0A0A0MRT6|A0A0A0MRT6_HUMAN Abl interactor 1 OS=Homo sapiens GN=ABI1 PE=1 SV=1;>tr|Q59G41|Q59G41_HUMAN Abl-interactor 1 variant (Fragment) OS=Homo sapiens PE=2 SV=1;>sp|Q8IZP0|ABI1_HUMAN Abl interactor 1 OS=Homo sapiens GN=ABI1 PE=1 SV=4;>tr|B6VEX5|B6V	19	11	11	6	2	2	4	4	4	4	3	3	4	4	0	0	4	4	4	4	3	3	1	1	5	5	2	2	4	4	4	4	3	3	4	4	0	0	4	4	4	4
A0A0A0MS15;Q0ZCH6;A2J1N7	A0A0A0MS15;Q0ZCH6;A2J1N7	3;3;2	1;1;0	1;1;0			>sp|A0A0A0MS15|HV349_HUMAN Immunoglobulin heavy variable 3-49 OS=Homo sapiens GN=IGHV3-49 PE=1 SV=1;>tr|Q0ZCH6|Q0ZCH6_HUMAN Immunglobulin heavy chain variable region (Fragment) OS=Homo sapiens PE=4 SV=1;>tr|A2J1N7|A2J1N7_HUMAN Rheumatoid factor RF-ET10 (Fr	3	3	1	1	0	0	2	2	0	1	0	0	0	0	0	0	0	0	0	0	0	0	0	0	1	1	0	0	0	0	0	1	0	0	0	0	0	0	0	0	0	0
Q5SWX3;A8K6N9;A0A0A0MS52;A0A0A0MT11;Q13555;Q8WU40;H0Y6G2;B3KY86;B4DVQ3;Q13280;H7C394	Q5SWX3;A8K6N9;A0A0A0MS52;A0A0A0MT11;Q13555;Q8WU40;H0Y6G2;B3KY86	8;8;8;8;8;5;4;4;3;3;1	3;3;3;3;3;2;2;1;1;2;1	2;2;2;2;2;1;1;1;1;1;0	Calcium/calmodulin-dependent protein kinase type II subunit gamma	CAMK2G	>tr|Q5SWX3|Q5SWX3_HUMAN Calcium/calmodulin-dependent protein kinase (CaM kinase) II gamma, isoform CRA_n OS=Homo sapiens GN=CAMK2G PE=1 SV=1;>tr|A8K6N9|A8K6N9_HUMAN cDNA FLJ77153, highly similar to Homo sapiens calcium/calmodulin-dependent protein kinase (	11	8	3	2	1	1	3	3	3	2	2	2	2	2	0	0	3	2	1	1	1	1	2	3	3	2	0	0	1	1	1	0	1	1	0	0	0	0	1	0	0	0
B4DU08;B4E3D6;A0A0A0MS70;H0Y4G9;A0A0A0MST0;Q99836;A0A192GQD4;B4DT48	B4DU08;B4E3D6;A0A0A0MS70;H0Y4G9;A0A0A0MST0;Q99836;A0A192GQD4;B4DT48	2;2;2;2;2;2;1;1	2;2;2;2;2;2;1;1	2;2;2;2;2;2;1;1	Myeloid differentiation primary response protein MyD88	MYD88	>tr|B4DU08|B4DU08_HUMAN cDNA FLJ58859, highly similar to Myeloid differentiation primary responseprotein MyD88 OS=Homo sapiens PE=2 SV=1;>tr|B4E3D6|B4E3D6_HUMAN Myeloid differentiation primary response protein MyD88 OS=Homo sapiens PE=2 SV=1;>tr|A0A0A0MS70	8	2	2	2	0	0	0	0	0	0	2	0	0	0	0	0	0	0	0	0	0	0	0	0	0	0	0	0	0	0	0	0	2	0	0	0	0	0	0	0	0	0
A0A0A0MSA0;B0YJ32;Q16787;K7EIP4;Q59HA6;A0A0A0MTS5;A0A0A6YYF2	A0A0A0MSA0;B0YJ32;Q16787;K7EIP4;Q59HA6;A0A0A0MTS5;A0A0A6YYF2	2;2;2;1;1;1;1	1;1;1;1;1;1;1	1;1;1;1;1;1;1	Laminin subunit alpha-3	LAMA3	>tr|A0A0A0MSA0|A0A0A0MSA0_HUMAN Laminin subunit alpha-3 OS=Homo sapiens GN=LAMA3 PE=1 SV=1;>tr|B0YJ32|B0YJ32_HUMAN Laminin alpha-3 chain variant 1 OS=Homo sapiens GN=LAMA3 PE=4 SV=1;>sp|Q16787|LAMA3_HUMAN Laminin subunit alpha-3 OS=Homo sapiens GN=LAMA3 PE	7	2	1	1	1	1	1	2	1	1	0	0	1	1	1	1	1	0	1	1	1	1	1	1	1	1	0	0	0	1	0	0	0	0	0	0	0	0	0	0	0	0
A0A0A0MSB4;Q6ZN50;B4DFA8;Q969R2;A0A024R1L4;H7C428	A0A0A0MSB4;Q6ZN50;B4DFA8;Q969R2;A0A024R1L4;H7C428	2;2;2;2;1;1	1;1;1;1;1;1	1;1;1;1;1;1	Oxysterol-binding protein;Oxysterol-binding protein 2	OSBP2	>tr|A0A0A0MSB4|A0A0A0MSB4_HUMAN Oxysterol-binding protein OS=Homo sapiens GN=OSBP2 PE=1 SV=1;>tr|Q6ZN50|Q6ZN50_HUMAN Oxysterol-binding protein OS=Homo sapiens GN=OSBP2 PE=1 SV=1;>tr|B4DFA8|B4DFA8_HUMAN Oxysterol-binding protein OS=Homo sapiens PE=2 SV=1;>s	6	2	1	1	0	0	1	1	1	1	0	0	0	0	0	0	1	1	0	0	0	0	0	0	1	1	0	0	0	0	1	1	0	0	0	0	0	0	0	0	0	0
A0A0A0MSB8;Q9UPT5;B4DJ07;Q63HP7;Q5G0E1;A0A0A0MRE1;B5MCY9;K7ERQ5;C9JME6;C9JKC2	A0A0A0MSB8;Q9UPT5;B4DJ07;Q63HP7;Q5G0E1;A0A0A0MRE1	17;17;15;14;14;14;4;4;3;3	17;17;15;14;14;14;4;4;3;3	17;17;15;14;14;14;4;4;3;3	Exocyst complex component 7	EXOC7;DKFZp686P1551	>tr|A0A0A0MSB8|A0A0A0MSB8_HUMAN Exocyst complex component 7 OS=Homo sapiens GN=EXOC7 PE=1 SV=1;>sp|Q9UPT5|EXOC7_HUMAN Exocyst complex component 7 OS=Homo sapiens GN=EXOC7 PE=1 SV=3;>tr|B4DJ07|B4DJ07_HUMAN Exocyst complex component 7 OS=Homo sapiens GN=EXOC	10	17	17	17	0	0	4	3	2	4	2	2	1	1	0	0	8	8	3	3	2	2	3	3	5	4	0	0	4	3	2	4	2	2	1	1	0	0	8	8	3	3
A0A0A0MSV2;W8DTH1;Q7Z2W7;F8WD55;B4E1F2;A0A0B4L3I6;H0Y7P0	A0A0A0MSV2;W8DTH1;Q7Z2W7	5;5;5;2;1;1;1	5;5;5;2;1;1;1	5;5;5;2;1;1;1	Transient receptor potential cation channel subfamily M member 8	TRPM8	>tr|A0A0A0MSV2|A0A0A0MSV2_HUMAN Transient receptor potential cation channel subfamily M member 8 OS=Homo sapiens GN=TRPM8 PE=1 SV=1;>tr|W8DTH1|W8DTH1_HUMAN Transient receptor melastatin 8 OS=Homo sapiens GN=TRPM8 PE=2 SV=1;>sp|Q7Z2W7|TRPM8_HUMAN Transient	7	5	5	5	0	0	0	0	0	1	1	1	1	0	0	0	1	2	0	0	0	0	0	0	0	0	0	0	0	0	0	1	1	1	1	0	0	0	1	2	0	0
A0A0A0MSW4;P48739;B2R7P6;B3KYB6;B3KYB7;B3KVT6	A0A0A0MSW4;P48739;B2R7P6;B3KYB6;B3KYB7	10;10;9;5;5;1	9;9;8;4;4;1	9;9;8;4;4;1	Phosphatidylinositol transfer protein beta isoform	PITPNB	>tr|A0A0A0MSW4|A0A0A0MSW4_HUMAN Phosphatidylinositol transfer protein beta isoform OS=Homo sapiens GN=PITPNB PE=1 SV=1;>sp|P48739|PIPNB_HUMAN Phosphatidylinositol transfer protein beta isoform OS=Homo sapiens GN=PITPNB PE=1 SV=2;>tr|B2R7P6|B2R7P6_HUMAN cDN	6	10	9	9	4	4	4	4	6	6	1	2	3	3	1	1	3	5	1	1	3	3	5	5	3	3	3	3	3	3	5	5	1	2	2	2	1	1	2	4	1	1
A0A0A0MT35;Q8TBF2;J3QKK8;A0A0A0MRV4;J3KRV9;J3KPF6;J3KPF5	A0A0A0MT35;Q8TBF2;J3QKK8;A0A0A0MRV4;J3KRV9;J3KPF6;J3KPF5	6;6;5;5;5;5;5	6;6;5;5;5;5;5	6;6;5;5;5;5;5	Prostamide/prostaglandin F synthase	FAM213B	>tr|A0A0A0MT35|A0A0A0MT35_HUMAN Prostamide/prostaglandin F synthase OS=Homo sapiens GN=FAM213B PE=1 SV=1;>sp|Q8TBF2|PGFS_HUMAN Prostamide/prostaglandin F synthase OS=Homo sapiens GN=FAM213B PE=1 SV=1;>tr|J3QKK8|J3QKK8_HUMAN Prostamide/prostaglandin F synth	7	6	6	6	0	0	3	3	3	3	1	1	2	2	0	0	3	2	4	4	3	3	5	5	3	3	0	0	3	3	3	3	1	1	2	2	0	0	3	2	4	4
A0A0A0MT60;Q5T1M5;B4DZS8;X6RKW4;B4DVS2	A0A0A0MT60;Q5T1M5;B4DZS8;X6RKW4	11;11;9;7;3	11;11;9;7;3	11;11;9;7;3	FK506-binding protein 15;Peptidyl-prolyl cis-trans isomerase	FKBP15	>tr|A0A0A0MT60|A0A0A0MT60_HUMAN FK506-binding protein 15 (Fragment) OS=Homo sapiens GN=FKBP15 PE=1 SV=1;>sp|Q5T1M5|FKB15_HUMAN FK506-binding protein 15 OS=Homo sapiens GN=FKBP15 PE=1 SV=2;>tr|B4DZS8|B4DZS8_HUMAN cDNA FLJ57682 (Fragment) OS=Homo sapiens PE=	5	11	11	11	0	0	1	2	2	1	0	0	2	2	0	0	6	5	2	2	2	1	1	1	4	4	0	0	1	2	2	1	0	0	2	2	0	0	6	5	2	2
A0A0A0MT67;Q8N387;A0A0A0MTD6	A0A0A0MT67;Q8N387	4;4;1	4;4;1	4;4;1	Mucin-15	MUC15	>tr|A0A0A0MT67|A0A0A0MT67_HUMAN Mucin-15 OS=Homo sapiens GN=MUC15 PE=1 SV=1;>sp|Q8N387|MUC15_HUMAN Mucin-15 OS=Homo sapiens GN=MUC15 PE=2 SV=2	3	4	4	4	1	2	2	2	2	2	0	0	2	2	3	3	3	3	0	1	1	1	0	0	2	2	1	2	2	2	2	2	0	0	2	2	3	3	3	3	0	1
A0A0A0MTB0;A0A0J9YYI4;Q86VE9	A0A0A0MTB0;A0A0J9YYI4;Q86VE9	5;5;5	5;5;5	5;5;5	Serine incorporator 5	SERINC5	>tr|A0A0A0MTB0|A0A0A0MTB0_HUMAN Serine incorporator 5 OS=Homo sapiens GN=SERINC5 PE=1 SV=1;>tr|A0A0J9YYI4|A0A0J9YYI4_HUMAN Serine incorporator 5 OS=Homo sapiens GN=SERINC5 PE=1 SV=1;>sp|Q86VE9|SERC5_HUMAN Serine incorporator 5 OS=Homo sapiens GN=SERINC5 PE	3	5	5	5	1	1	2	1	5	5	2	3	1	1	1	2	2	3	2	2	2	2	1	2	2	2	1	1	2	1	5	5	2	3	1	1	1	2	2	3	2	2
A0A0A0MTR7;A0A0A0MTC1;Q63HN8;A0A024R8W2	A0A0A0MTR7;A0A0A0MTC1;Q63HN8	3;3;3;1	2;2;2;1	2;2;2;1	E3 ubiquitin-protein ligase RNF213	RNF213	>tr|A0A0A0MTR7|A0A0A0MTR7_HUMAN E3 ubiquitin-protein ligase RNF213 OS=Homo sapiens GN=RNF213 PE=1 SV=1;>tr|A0A0A0MTC1|A0A0A0MTC1_HUMAN E3 ubiquitin-protein ligase RNF213 OS=Homo sapiens GN=RNF213 PE=1 SV=1;>sp|Q63HN8|RN213_HUMAN E3 ubiquitin-protein ligase	4	3	2	2	0	1	0	0	2	2	0	0	0	0	0	0	0	0	0	0	0	1	0	0	0	0	0	0	0	0	1	1	0	0	0	0	0	0	0	0	0	0
A0A0A0MTC8;Q9NQ36;B3KS09;Q6ZMN9;Q6ZS56;Q8IWY4;H0YDN3;H0YEB3;Q5CZ68;Q8NAV8;Q8IX30	A0A0A0MTC8;Q9NQ36;B3KS09;Q6ZMN9	6;6;4;3;2;2;1;1;1;1;1	6;6;4;3;2;2;1;1;1;1;1	6;6;4;3;2;2;1;1;1;1;1	Signal peptide, CUB and EGF-like domain-containing protein 2	SCUBE2	>tr|A0A0A0MTC8|A0A0A0MTC8_HUMAN Signal peptide, CUB and EGF-like domain-containing protein 2 OS=Homo sapiens GN=SCUBE2 PE=1 SV=1;>sp|Q9NQ36|SCUB2_HUMAN Signal peptide, CUB and EGF-like domain-containing protein 2 OS=Homo sapiens GN=SCUBE2 PE=2 SV=2;>tr|B3K	11	6	6	6	0	0	2	3	0	0	0	0	0	0	3	3	1	1	0	0	0	0	0	0	0	1	0	0	2	3	0	0	0	0	0	0	3	3	1	1	0	0
V9HWF0;A0A0A0MTH3;Q13418;A0A087WWY6;E9PQ52;A0A087WW45;Q59FP4	V9HWF0;A0A0A0MTH3;Q13418	13;13;13;2;1;1;1	13;13;13;2;1;1;1	13;13;13;2;1;1;1	Integrin-linked protein kinase	HEL-S-28;ILK	>tr|V9HWF0|V9HWF0_HUMAN Epididymis secretory protein Li 28 OS=Homo sapiens GN=HEL-S-28 PE=2 SV=1;>tr|A0A0A0MTH3|A0A0A0MTH3_HUMAN Integrin-linked protein kinase OS=Homo sapiens GN=ILK PE=1 SV=1;>sp|Q13418|ILK_HUMAN Integrin-linked protein kinase OS=Homo sap	7	13	13	13	2	0	5	5	6	6	1	1	2	3	0	0	5	4	0	0	3	4	5	6	4	3	2	0	5	5	6	6	1	1	2	3	0	0	5	4	0	0
B4DI52;A0A0A0MTJ2;B4DFW5;Q9BQ16;E7ENT7;Q4W5E2;E7ENM6	B4DI52;A0A0A0MTJ2;B4DFW5;Q9BQ16	9;9;9;9;4;2;1	8;8;8;8;3;2;1	8;8;8;8;3;2;1	Testican-3	SPOCK3	>tr|B4DI52|B4DI52_HUMAN cDNA FLJ59526, highly similar to Testican-3 OS=Homo sapiens PE=2 SV=1;>tr|A0A0A0MTJ2|A0A0A0MTJ2_HUMAN Sparc/osteonectin, cwcv and kazal-like domains proteoglycan (Testican) 3, isoform CRA_b OS=Homo sapiens GN=SPOCK3 PE=1 SV=1;>tr|B4	7	9	8	8	2	2	2	2	8	7	2	2	0	0	1	1	4	4	2	2	2	2	2	2	2	2	1	1	1	1	7	6	1	1	0	0	0	0	3	3	1	1
A0A140VKB1;A0A0A0MTN0;Q13617;Q5T2B5;B7Z1Y1;Q5T2B7	A0A140VKB1;A0A0A0MTN0;Q13617;Q5T2B5;B7Z1Y1	8;8;8;7;6;1	8;8;8;7;6;1	8;8;8;7;6;1	Cullin-2	CUL2	>tr|A0A140VKB1|A0A140VKB1_HUMAN Testis secretory sperm-binding protein Li 238E OS=Homo sapiens PE=2 SV=1;>tr|A0A0A0MTN0|A0A0A0MTN0_HUMAN Cullin-2 OS=Homo sapiens GN=CUL2 PE=1 SV=1;>sp|Q13617|CUL2_HUMAN Cullin-2 OS=Homo sapiens GN=CUL2 PE=1 SV=2;>tr|Q5T2B5|	6	8	8	8	0	0	1	1	5	5	1	1	1	2	0	0	2	4	1	0	0	1	1	1	0	0	0	0	1	1	5	5	1	1	1	2	0	0	2	4	1	0
A0A0A0MTP6;O15357	A0A0A0MTP6;O15357	2;1	2;1	2;1	Phosphatidylinositol 3,4,5-trisphosphate 5-phosphatase 2	INPPL1	>tr|A0A0A0MTP6|A0A0A0MTP6_HUMAN Phosphatidylinositol 3,4,5-trisphosphate 5-phosphatase 2 OS=Homo sapiens GN=INPPL1 PE=1 SV=1;>sp|O15357|SHIP2_HUMAN Phosphatidylinositol 3,4,5-trisphosphate 5-phosphatase 2 OS=Homo sapiens GN=INPPL1 PE=1 SV=2	2	2	2	2	0	0	0	0	0	0	1	1	0	0	0	0	1	0	0	0	0	0	0	0	0	0	0	0	0	0	0	0	1	1	0	0	0	0	1	0	0	0
C0JYZ2;D3DPG0;A0A0A0MTS7;Q8WZ42;D3DPF9;A0A0A0MRA3	C0JYZ2;D3DPG0;A0A0A0MTS7;Q8WZ42;D3DPF9;A0A0A0MRA3	4;4;4;4;3;3	4;4;4;4;3;3	4;4;4;4;3;3	Titin	TTN	>tr|C0JYZ2|C0JYZ2_HUMAN Titin OS=Homo sapiens GN=TTN PE=4 SV=1;>tr|D3DPG0|D3DPG0_HUMAN Titin, isoform CRA_a OS=Homo sapiens GN=TTN PE=4 SV=1;>tr|A0A0A0MTS7|A0A0A0MTS7_HUMAN Titin OS=Homo sapiens GN=TTN PE=1 SV=1;>sp|Q8WZ42|TITIN_HUMAN Titin OS=Homo sapiens	6	4	4	4	1	1	1	0	0	0	1	1	0	0	1	1	0	0	1	1	0	0	0	0	1	1	1	1	1	0	0	0	1	1	0	0	1	1	0	0	1	1
B3KQS1;B3KNF4;A0A0A0N0M1;O43490;B0AZU8;D6RIF3;A0A0A0N0N1	B3KQS1;B3KNF4;A0A0A0N0M1;O43490	13;13;13;13;3;1;1	13;13;13;13;3;1;1	13;13;13;13;3;1;1	Prominin-1	PROM1	>tr|B3KQS1|B3KQS1_HUMAN cDNA PSEC0102 fis, clone NT2RP2003127, highly similar to Prominin-1 OS=Homo sapiens PE=2 SV=1;>tr|B3KNF4|B3KNF4_HUMAN cDNA FLJ14514 fis, clone NT2RM1000742, highly similar to Prominin-1 OS=Homo sapiens PE=2 SV=1;>tr|A0A0A0N0M1|A0A0A	7	13	13	13	7	7	2	3	9	9	2	3	0	0	7	8	5	4	2	2	3	3	5	5	4	4	7	7	2	3	9	9	2	3	0	0	7	8	5	4	2	2
B4DFF0;A0A0A0U994;A7MBN3;P29400;H0Y9R8	B4DFF0;A0A0A0U994;A7MBN3;P29400;H0Y9R8	2;2;2;2;1	1;1;1;1;1	1;1;1;1;1	Collagen alpha-5(IV) chain	COL4A5	>tr|B4DFF0|B4DFF0_HUMAN cDNA FLJ57483, highly similar to Collagen alpha-5(IV) chain OS=Homo sapiens PE=2 SV=1;>tr|A0A0A0U994|A0A0A0U994_HUMAN Collagen type IV alpha 5 transcript variant 2 OS=Homo sapiens GN=COL4A5 PE=2 SV=1;>tr|A7MBN3|A7MBN3_HUMAN Collagen	5	2	1	1	1	1	0	0	1	2	0	0	0	0	0	0	0	0	0	0	0	0	0	0	1	1	0	0	0	0	0	1	0	0	0	0	0	0	0	0	0	0
A0A0J9YXI7;Q6XYC3;A0A0G2JMR5;A0A0A6YY98;V5NAT2;Q9NQA5;Q9H1D0;Q8NC07;H7C2J6	A0A0J9YXI7;Q6XYC3;A0A0G2JMR5;A0A0A6YY98;V5NAT2;Q9NQA5;Q9H1D0;Q8NC07;H7C2J6	2;2;2;2;2;2;2;1;1	2;2;2;2;2;2;2;1;1	2;2;2;2;2;2;2;1;1	Transient receptor potential cation channel subfamily V member 5;Transient receptor potential cation channel subfamily V member 6	TRPV6;TRPV5	>tr|A0A0J9YXI7|A0A0J9YXI7_HUMAN Transient receptor potential cation channel subfamily V member 5 OS=Homo sapiens GN=TRPV5 PE=4 SV=1;>tr|Q6XYC3|Q6XYC3_HUMAN LP6728 OS=Homo sapiens PE=2 SV=1;>tr|A0A0G2JMR5|A0A0G2JMR5_HUMAN Transient receptor potential cation	9	2	2	2	0	0	0	0	2	2	0	0	0	0	0	0	0	0	0	0	0	0	0	0	0	0	0	0	0	0	2	2	0	0	0	0	0	0	0	0	0	0
K7EJ28;Q6U6I7;Q2QBA2;B3KR02;A0A0U5EM56;Q8NFH7;Q6FGR7;Q6FGN4;A0A0A6YY99;O75888;C9JFN2;C9JF68	K7EJ28;Q6U6I7;Q2QBA2;B3KR02;A0A0U5EM56;Q8NFH7;Q6FGR7;Q6FGN4;A0A0A6YY99;O75888;C9JFN2;C9JF68	2;2;2;2;2;2;2;2;2;2;1;1	2;2;2;2;2;2;2;2;2;2;1;1	2;2;2;2;2;2;2;2;2;2;1;1	Tumor necrosis factor ligand superfamily member 13	TNFSF13;hCG_2045906	>tr|K7EJ28|K7EJ28_HUMAN Tumor necrosis factor ligand superfamily member 13 OS=Homo sapiens GN=TNFSF13 PE=3 SV=1;>tr|Q6U6I7|Q6U6I7_HUMAN APRIL (Fragment) OS=Homo sapiens PE=2 SV=1;>tr|Q2QBA2|Q2QBA2_HUMAN Tumor necrosis factor (Ligand) superfamily member 13	12	2	2	2	0	0	1	1	1	1	0	0	0	0	0	0	1	1	0	0	1	1	1	1	1	1	0	0	1	1	1	1	0	0	0	0	0	0	1	1	0	0
A0A0A6YYA0;Q9Y3B3;B4E2C1;Q3B7W7;G3V2Y2	A0A0A6YYA0;Q9Y3B3;B4E2C1;Q3B7W7	5;5;4;3;1	5;5;4;3;1	5;5;4;3;1	Transmembrane emp24 domain-containing protein 7	TMED7	>tr|A0A0A6YYA0|A0A0A6YYA0_HUMAN Protein TMED7-TICAM2 OS=Homo sapiens GN=TMED7-TICAM2 PE=3 SV=1;>sp|Q9Y3B3|TMED7_HUMAN Transmembrane emp24 domain-containing protein 7 OS=Homo sapiens GN=TMED7 PE=1 SV=2;>tr|B4E2C1|B4E2C1_HUMAN cDNA FLJ57776, highly similar t	5	5	5	5	4	4	5	5	5	5	0	0	4	4	2	2	3	3	1	1	3	3	2	2	2	2	4	4	5	5	5	5	0	0	4	4	2	2	3	3	1	1
Q0VAG8;Q0VAG7;B2RB25;A0A0A6YYG5;Q53S48;Q3MIM1;Q9Y6Q2;H7C1E2	Q0VAG8;Q0VAG7;B2RB25;A0A0A6YYG5;Q53S48;Q3MIM1;Q9Y6Q2	5;5;5;5;5;5;5;1	5;5;5;5;5;5;5;1	5;5;5;5;5;5;5;1	Stonin-1	STON1;ALF;STON1-GTF2A1L	>tr|Q0VAG8|Q0VAG8_HUMAN STON1 protein OS=Homo sapiens GN=STON1 PE=2 SV=1;>tr|Q0VAG7|Q0VAG7_HUMAN STON1 protein OS=Homo sapiens GN=STON1 PE=2 SV=1;>tr|B2RB25|B2RB25_HUMAN cDNA, FLJ95267, highly similar to Homo sapiens stoned B-like factor (SBLF), mRNA OS=Ho	8	5	5	5	0	0	1	0	0	1	0	0	1	0	0	0	0	0	0	0	0	1	0	0	2	3	0	0	1	0	0	1	0	0	1	0	0	0	0	0	0	0
A0A0A6YYH1;Q7Z6K5;H0YMP5;H0YL03;H0YMK0;H0YL85;A0A024RC62;Q6PK37;H0YLI7;P59780	A0A0A6YYH1;Q7Z6K5	8;7;2;2;2;2;1;1;1;1	8;7;2;2;2;2;1;1;1;1	8;7;2;2;2;2;1;1;1;1	Arpin	ARPIN	>tr|A0A0A6YYH1|A0A0A6YYH1_HUMAN Protein C15orf38-AP3S2 OS=Homo sapiens GN=C15orf38-AP3S2 PE=4 SV=1;>sp|Q7Z6K5|ARPIN_HUMAN Arpin OS=Homo sapiens GN=ARPIN PE=1 SV=1	10	8	8	8	0	0	1	2	2	2	0	0	1	1	0	0	5	5	1	1	2	2	3	3	3	2	0	0	1	2	2	2	0	0	1	1	0	0	5	5	1	1
A0A0A6YYJ4;Q07654;X6R3S7	A0A0A6YYJ4;Q07654;X6R3S7	5;5;4	5;5;4	5;5;4	Trefoil factor 3	TFF3	>tr|A0A0A6YYJ4|A0A0A6YYJ4_HUMAN Trefoil factor 3 OS=Homo sapiens GN=TFF3 PE=1 SV=1;>sp|Q07654|TFF3_HUMAN Trefoil factor 3 OS=Homo sapiens GN=TFF3 PE=1 SV=1;>tr|X6R3S7|X6R3S7_HUMAN Trefoil factor 3 OS=Homo sapiens GN=TFF3 PE=1 SV=2	3	5	5	5	0	0	1	1	1	1	3	3	0	1	0	0	3	3	1	1	4	4	1	0	3	3	0	0	1	1	1	1	3	3	0	1	0	0	3	3	1	1
X5D9D2;A0A0A7KU15;Q92574	X5D9D2;A0A0A7KU15;Q92574	2;2;2	2;2;2	2;2;2	Hamartin	TSC1	>tr|X5D9D2|X5D9D2_HUMAN Tuberous sclerosis 1 isoform A (Fragment) OS=Homo sapiens GN=TSC1 PE=2 SV=1;>tr|A0A0A7KU15|A0A0A7KU15_HUMAN TSC1-PDGFEB fusion protein (Fragment) OS=Homo sapiens GN=TSC1-PDGFRB fusion PE=2 SV=1;>sp|Q92574|TSC1_HUMAN Hamartin OS=Homo	3	2	2	2	0	0	0	0	0	0	0	0	0	0	0	0	0	0	1	1	0	0	0	0	0	1	0	0	0	0	0	0	0	0	0	0	0	0	0	0	1	1
A0A0A8K9B4;Q96BQ1;C9JB68;C9J5Z5;C9IZW7	A0A0A8K9B4;Q96BQ1;C9JB68;C9J5Z5	7;7;4;4;3	7;7;4;4;3	7;7;4;4;3	Protein FAM3D	FAM3D	>tr|A0A0A8K9B4|A0A0A8K9B4_HUMAN Family with sequence similarity 3, member D OS=Homo sapiens GN=FAM3D PE=2 SV=1;>sp|Q96BQ1|FAM3D_HUMAN Protein FAM3D OS=Homo sapiens GN=FAM3D PE=1 SV=1;>tr|C9JB68|C9JB68_HUMAN Protein FAM3D (Fragment) OS=Homo sapiens GN=FAM3D	5	7	7	7	2	2	2	2	4	5	2	2	3	2	1	1	2	2	0	0	2	3	2	1	2	2	2	2	2	2	4	5	2	2	3	2	1	1	2	2	0	0
A0A0A8KWK3;Q03167;E9PKY4	A0A0A8KWK3;Q03167	20;20;2	20;20;2	20;20;2	Transforming growth factor beta receptor type 3	TGFBR3	>tr|A0A0A8KWK3|A0A0A8KWK3_HUMAN Transforming growth factor, beta receptor III OS=Homo sapiens GN=TGFBR3 PE=2 SV=1;>sp|Q03167|TGBR3_HUMAN Transforming growth factor beta receptor type 3 OS=Homo sapiens GN=TGFBR3 PE=1 SV=3	3	20	20	20	17	16	15	17	14	12	5	5	11	13	10	11	8	8	7	8	10	11	12	12	6	8	17	16	15	17	14	12	5	5	11	13	10	11	8	8	7	8
Q58F05;A0A0B4J1W3;B2RBE5;Q9BXJ9;B4E2T6;A4FU51;Q6N069	Q58F05;A0A0B4J1W3;B2RBE5;Q9BXJ9;B4E2T6	3;3;3;3;2;1;1	3;3;3;3;2;1;1	3;3;3;3;2;1;1	N-alpha-acetyltransferase 15, NatA auxiliary subunit	NARG1;NAA15	>tr|Q58F05|Q58F05_HUMAN NARG1 protein (Fragment) OS=Homo sapiens GN=NARG1 PE=2 SV=1;>tr|A0A0B4J1W3|A0A0B4J1W3_HUMAN N-alpha-acetyltransferase 15, NatA auxiliary subunit OS=Homo sapiens GN=NAA15 PE=1 SV=1;>tr|B2RBE5|B2RBE5_HUMAN cDNA, FLJ95468, highly simil	7	3	3	3	0	0	0	0	1	2	1	1	0	0	0	0	0	0	0	0	0	0	0	0	0	0	0	0	0	0	1	2	1	1	0	0	0	0	0	0	0	0
A2J1N0;A0A0B4J1X5;A0A075B7E8;A0N5T0	A2J1N0;A0A0B4J1X5;A0A075B7E8	3;3;2;1	2;2;1;1	1;1;1;1		IGHV3OR16-13	>tr|A2J1N0|A2J1N0_HUMAN Rheumatoid factor RF-IP14 (Fragment) OS=Homo sapiens PE=2 SV=1;>tr|A0A0B4J1X5|A0A0B4J1X5_HUMAN Protein IGHV3-74 (Fragment) OS=Homo sapiens GN=IGHV3-74 PE=1 SV=1;>tr|A0A075B7E8|A0A075B7E8_HUMAN Protein IGHV3OR16-13 (Fragment) OS=Homo	4	3	2	1	0	0	2	2	3	3	0	0	1	1	2	2	2	1	0	0	2	2	0	0	1	1	0	0	1	1	2	2	0	0	1	1	1	1	1	0	0	0
A0A0B4J207;P21108	A0A0B4J207;P21108	8;8	1;1	1;1	Ribose-phosphate pyrophosphokinase 3	PRPS1L1	>tr|A0A0B4J207|A0A0B4J207_HUMAN Ribose-phosphate pyrophosphokinase 3 OS=Homo sapiens GN=PRPS1L1 PE=1 SV=1;>sp|P21108|PRPS3_HUMAN Ribose-phosphate pyrophosphokinase 3 OS=Homo sapiens GN=PRPS1L1 PE=1 SV=2	2	8	1	1	3	3	4	3	4	4	2	2	5	5	3	3	6	6	3	3	6	6	4	4	4	4	0	0	0	0	0	0	1	1	0	0	0	0	0	0	0	0
A0A0B4J287;Q9H0A8;H3BPG2;H3BQF2;H3BM91	A0A0B4J287;Q9H0A8;H3BPG2;H3BQF2;H3BM91	2;2;1;1;1	2;2;1;1;1	2;2;1;1;1	COMM domain-containing protein 4	COMMD4	>tr|A0A0B4J287|A0A0B4J287_HUMAN COMM domain-containing protein 4 OS=Homo sapiens GN=COMMD4 PE=1 SV=1;>sp|Q9H0A8|COMD4_HUMAN COMM domain-containing protein 4 OS=Homo sapiens GN=COMMD4 PE=1 SV=1;>tr|H3BPG2|H3BPG2_HUMAN COMM domain-containing protein 4 (Fragm	5	2	2	2	0	0	0	0	0	0	0	0	0	0	0	0	2	2	0	0	0	0	0	0	1	1	0	0	0	0	0	0	0	0	0	0	0	0	2	2	0	0
B3KP31;A0A0B4J2A0;Q9UHJ6;B4DPJ0	B3KP31;A0A0B4J2A0;Q9UHJ6	4;4;4;1	4;4;4;1	4;4;4;1	Sedoheptulokinase	SHPK	>tr|B3KP31|B3KP31_HUMAN cDNA FLJ31047 fis, clone HSYRA2000424, highly similar to Carbohydrate kinase-like protein (EC 2.7.1.-) OS=Homo sapiens PE=2 SV=1;>tr|A0A0B4J2A0|A0A0B4J2A0_HUMAN Uncharacterized protein OS=Homo sapiens PE=1 SV=1;>sp|Q9UHJ6|SHPK_HUMAN	4	4	4	4	0	0	0	0	0	0	1	2	0	0	0	0	1	2	1	1	0	0	0	0	0	0	0	0	0	0	0	0	1	2	0	0	0	0	1	2	1	1
A0A0B4J2A2;P0DN37	A0A0B4J2A2;P0DN37	6;5	1;1	1;1			>sp|A0A0B4J2A2|PAL4C_HUMAN Peptidyl-prolyl cis-trans isomerase A-like 4C OS=Homo sapiens GN=PPIAL4C PE=2 SV=1;>sp|P0DN37|PAL4G_HUMAN Peptidyl-prolyl cis-trans isomerase A-like 4G OS=Homo sapiens GN=PPIAL4G PE=3 SV=1	2	6	1	1	3	3	4	3	3	3	1	1	3	3	1	1	4	3	0	0	3	3	3	3	3	3	0	0	1	0	0	0	0	0	0	0	0	0	0	0	0	0
A0A0P1J1R0;Q5W0H4;A0A0B4J2C3;P13693;J3KPG2;A0A024RDY2;B4DKJ4;E9PJF7;H0YCX0;Q9UP43;Q56UQ5;Q9HAU6	A0A0P1J1R0;Q5W0H4;A0A0B4J2C3;P13693;J3KPG2;A0A024RDY2;B4DKJ4;E9PJF7	10;10;10;10;8;7;6;6;3;3;3;1	10;10;10;10;8;7;6;6;3;3;3;1	2;2;2;2;2;2;0;2;0;0;0;1	Translationally-controlled tumor protein	TPT1	>tr|A0A0P1J1R0|A0A0P1J1R0_HUMAN Translationally-controlled tumor protein OS=Homo sapiens GN=seTCTP PE=3 SV=1;>tr|Q5W0H4|Q5W0H4_HUMAN Translationally-controlled tumor protein OS=Homo sapiens GN=TPT1 PE=1 SV=1;>tr|A0A0B4J2C3|A0A0B4J2C3_HUMAN Translationally-	12	10	10	2	6	6	6	6	8	9	5	6	8	8	2	1	8	8	4	4	6	6	6	7	6	5	6	6	6	6	8	9	5	6	8	8	2	1	8	8	4	4
A0A0B5E3E9;O95436;A8K9G0;M1V485;D6RBC0;A9YLN6;A9YLN5	A0A0B5E3E9;O95436;A8K9G0;M1V485	5;5;4;4;1;1;1	5;5;4;4;1;1;1	5;5;4;4;1;1;1	Sodium-dependent phosphate transport protein 2B;Tyrosine-protein kinase receptor	SLC34A2;SLC34A2-ROS1	>tr|A0A0B5E3E9|A0A0B5E3E9_HUMAN Sodium-dependent phosphate transport protein 2B (Fragment) OS=Homo sapiens GN=SLC34A2 PE=2 SV=1;>sp|O95436|NPT2B_HUMAN Sodium-dependent phosphate transport protein 2B OS=Homo sapiens GN=SLC34A2 PE=1 SV=3;>tr|A8K9G0|A8K9G0_HU	7	5	5	5	3	4	4	4	0	0	0	0	2	2	1	1	3	3	1	0	0	1	2	2	4	4	3	4	4	4	0	0	0	0	2	2	1	1	3	3	1	0
A0A0B6XK12	A0A0B6XK12	8	1	1			>tr|A0A0B6XK12|A0A0B6XK12_HUMAN Ras homolog family member A (Fragment) OS=Homo sapiens GN=RHOA PE=2 SV=1	1	8	1	1	5	5	6	6	8	8	5	5	6	7	3	2	5	5	6	5	7	7	6	6	6	6	0	0	1	1	1	1	0	0	0	1	0	0	0	0	1	0
Q09GE6;K8ESP8;K4UNA5;I2GUK8;G0WJF2;E7BBA4;E1Y6P5;A7LB40;A0A140T937;V5NQY1;O78179;C9E8W0;C5IYE7;A0A1C3PHW1;A0A0K8K5S5;A0A0B7NX34;A0A140T912;A0A140T930;Q29960;T2B9H9;F4NC92;A0A0S4T3D8;K7DWB0;A0A191XZN8;A0A0S4T1D5	Q09GE6;K8ESP8;K4UNA5;I2GUK8;G0WJF2;E7BBA4;E1Y6P5;A7LB40;A0A140T937;V5NQY1;O78179;C9E8W0;C5IYE7;A0A1C3PHW1;A0A0K8K5S5;A0A0B7NX34;A0A140T912;A0A140T930;Q29960;T2B9H9;F4NC92;A0A0S4T3D8;K7DWB0;A0A191XZN8;A0A0S4T1D5	8;8;8;8;8;8;8;8;8;8;8;8;8;8;8;8;8;8;8;7;7;7;6;6;6	8;8;8;8;8;8;8;8;8;8;8;8;8;8;8;8;8;8;8;7;7;7;6;6;6	1;1;1;1;1;1;1;1;1;1;1;1;1;1;1;1;1;1;1;1;1;1;1;1;1	HLA class I histocompatibility antigen, Cw-16 alpha chain	HLA-Cw;HLA-C	>tr|Q09GE6|Q09GE6_HUMAN MHC class I antigen (Fragment) OS=Homo sapiens GN=HLA-Cw PE=3 SV=1;>tr|K8ESP8|K8ESP8_HUMAN MHC class I antigen (Fragment) OS=Homo sapiens GN=HLA-C PE=3 SV=1;>tr|K4UNA5|K4UNA5_HUMAN MHC class I antigen (Fragment) OS=Homo sapiens GN=H	25	8	8	1	0	0	8	8	2	1	0	0	2	1	0	0	3	3	0	0	1	0	0	0	1	1	0	0	8	8	2	1	0	0	2	1	0	0	3	3	0	0
G3V5T0;A0A0C4DFM0;A0A0A0MR33;G3V267;B2RDN1;G3V4T6;O43708;Q59FU9;G3V3B9;H0YJN8	G3V5T0;A0A0C4DFM0;A0A0A0MR33;G3V267;B2RDN1;G3V4T6;O43708	7;7;6;6;6;6;6;3;2;1	7;7;6;6;6;6;6;3;2;1	7;7;6;6;6;6;6;3;2;1	Maleylacetoacetate isomerase	GSTZ1	>tr|G3V5T0|G3V5T0_HUMAN Maleylacetoacetate isomerase OS=Homo sapiens GN=GSTZ1 PE=1 SV=1;>tr|A0A0C4DFM0|A0A0C4DFM0_HUMAN Glutathione transferase zeta 1 (Maleylacetoacetate isomerase), isoform CRA_c OS=Homo sapiens GN=GSTZ1 PE=1 SV=1;>tr|A0A0A0MR33|A0A0A0MR3	10	7	7	7	1	1	2	2	4	5	2	3	4	4	1	1	1	1	2	2	0	0	2	2	2	2	1	1	2	2	4	5	2	3	4	4	1	1	1	1	2	2
A0A0C4DFP4;Q96IV0;Q9NV10;H0Y2P2	A0A0C4DFP4;Q96IV0	3;3;1;1	3;3;1;1	3;3;1;1	Peptide-N(4)-(N-acetyl-beta-glucosaminyl)asparagine amidase	NGLY1	>tr|A0A0C4DFP4|A0A0C4DFP4_HUMAN Peptide-N(4)-(N-acetyl-beta-glucosaminyl)asparagine amidase (Fragment) OS=Homo sapiens GN=NGLY1 PE=1 SV=1;>sp|Q96IV0|NGLY1_HUMAN Peptide-N(4)-(N-acetyl-beta-glucosaminyl)asparagine amidase OS=Homo sapiens GN=NGLY1 PE=1 SV=1	4	3	3	3	0	0	0	0	2	2	0	0	0	0	0	0	3	3	0	0	0	0	0	0	1	1	0	0	0	0	2	2	0	0	0	0	0	0	3	3	0	0
A0A0C4DFP6;Q9NQ79;Q5T4F6	A0A0C4DFP6;Q9NQ79;Q5T4F6	29;29;24	29;29;24	29;29;24	Cartilage acidic protein 1	CRTAC1	>tr|A0A0C4DFP6|A0A0C4DFP6_HUMAN Cartilage acidic protein 1 OS=Homo sapiens GN=CRTAC1 PE=1 SV=1;>sp|Q9NQ79|CRAC1_HUMAN Cartilage acidic protein 1 OS=Homo sapiens GN=CRTAC1 PE=1 SV=2;>tr|Q5T4F6|Q5T4F6_HUMAN Cartilage acidic protein 1 (Fragment) OS=Homo sapie	3	29	29	29	15	17	15	16	15	15	13	13	12	12	8	6	13	13	7	7	17	16	13	13	15	15	15	17	15	16	15	15	13	13	12	12	8	6	13	13	7	7
F5H3C5;F5H4R2;F5GYZ5;Q7Z7M6;Q4ZJI1;Q7Z7M7;Q7Z7M4;A0A0C4DFU2;P04179;G8JLJ2;A0A0C4DG56;A0A0C4DFU1;Q7Z7M5	F5H3C5;F5H4R2;F5GYZ5;Q7Z7M6;Q4ZJI1;Q7Z7M7;Q7Z7M4;A0A0C4DFU2;P04179;G8JLJ2;A0A0C4DG56;A0A0C4DFU1;Q7Z7M5	2;2;2;2;2;2;2;2;2;1;1;1;1	2;2;2;2;2;2;2;2;2;1;1;1;1	2;2;2;2;2;2;2;2;2;1;1;1;1	Superoxide dismutase;Superoxide dismutase [Mn], mitochondrial	SOD2	>tr|F5H3C5|F5H3C5_HUMAN Superoxide dismutase (Fragment) OS=Homo sapiens GN=SOD2 PE=1 SV=1;>tr|F5H4R2|F5H4R2_HUMAN Superoxide dismutase (Fragment) OS=Homo sapiens GN=SOD2 PE=1 SV=1;>tr|F5GYZ5|F5GYZ5_HUMAN Superoxide dismutase (Fragment) OS=Homo sapiens GN=S	13	2	2	2	0	0	0	0	0	0	1	1	0	0	1	1	0	0	0	0	0	0	0	0	0	0	0	0	0	0	0	0	1	1	0	0	1	1	0	0	0	0
A0A0C4DFW8;B4DT06;Q9H1B5;H0YB00	A0A0C4DFW8;B4DT06;Q9H1B5;H0YB00	2;2;2;1	2;2;2;1	2;2;2;1	Xylosyltransferase 2	XYLT2	>tr|A0A0C4DFW8|A0A0C4DFW8_HUMAN Xylosyltransferase 2 OS=Homo sapiens GN=XYLT2 PE=1 SV=1;>tr|B4DT06|B4DT06_HUMAN Xylosyltransferase 2 OS=Homo sapiens GN=XYLT2 PE=1 SV=1;>sp|Q9H1B5|XYLT2_HUMAN Xylosyltransferase 2 OS=Homo sapiens GN=XYLT2 PE=1 SV=2;>tr|H0YB0	4	2	2	2	2	1	1	1	0	0	0	0	1	1	0	0	0	0	0	0	0	0	0	0	0	0	2	1	1	1	0	0	0	0	1	1	0	0	0	0	0	0
E9PEZ7;E7EW77;E7EP65;A0A0C4DG21;F8WAL6;Q9NYB9;Q53RS4;E7EUA1;B7Z9N5;F8WAU3;F8WCD7;F8WAZ8;F8WBL5;F8WEB9	E9PEZ7;E7EW77;E7EP65;A0A0C4DG21;F8WAL6;Q9NYB9;Q53RS4	6;6;6;6;6;6;5;1;1;1;1;1;1;1	1;1;1;1;1;1;1;1;1;1;1;1;1;1	1;1;1;1;1;1;1;1;1;1;1;1;1;1	Abl interactor 2	ABI2;ABI-2	>tr|E9PEZ7|E9PEZ7_HUMAN Abl interactor 2 OS=Homo sapiens GN=ABI2 PE=1 SV=1;>tr|E7EW77|E7EW77_HUMAN Abl interactor 2 OS=Homo sapiens GN=ABI2 PE=1 SV=1;>tr|E7EP65|E7EP65_HUMAN Abl interactor 2 (Fragment) OS=Homo sapiens GN=ABI2 PE=1 SV=1;>tr|A0A0C4DG21|A0A0C	14	6	1	1	1	1	1	1	1	1	2	2	2	2	0	0	3	3	3	3	2	2	1	1	2	3	0	0	0	0	0	0	0	0	0	0	0	0	1	1	0	0
A0A0C4DGB5;E7ES10;B7Z5T9;E9PCH5;E7EVY3;B7Z574;Q59HE3;A0A024RAN2;P20810;Q86YM9;H0Y7F0;H0Y9H6;B2RCJ7;Q6AZE3;B7Z5T6;E9PDE4;B7Z6N0;B7Z4U9;E7EQ12;B7Z7L4;B2RDU1;A0A0A0MR45;E7EQA0;H0YD33;A8K8C4;A0A0C4DGD1;H0YA91;B7Z8S8;F8W7E0;H0Y944;E9PSG1;Q13940;Q15786;D6RC54;D6RGF7;D6RBR1;E7EN75;E7EQK6;B7Z8U1	A0A0C4DGB5;E7ES10;B7Z5T9;E9PCH5;E7EVY3;B7Z574;Q59HE3;A0A024RAN2;P20810;Q86YM9;H0Y7F0;H0Y9H6;B2RCJ7;Q6AZE3;B7Z5T6;E9PDE4;B7Z6N0;B7Z4U9;E7EQ12;B7Z7L4;B2RDU1;A0A0A0MR45;E7EQA0;H0YD33;A8K8C4	8;7;7;7;7;7;7;7;7;6;6;6;6;6;6;6;6;6;5;5;5;5;5;5;4;3;3;3;3;2;2;2;2;1;1;1;1;1;1	8;7;7;7;7;7;7;7;7;6;6;6;6;6;6;6;6;6;5;5;5;5;5;5;4;3;3;3;3;2;2;2;2;1;1;1;1;1;1	8;7;7;7;7;7;7;7;7;6;6;6;6;6;6;6;6;6;5;5;5;5;5;5;4;3;3;3;3;2;2;2;2;1;1;1;1;1;1	Calpastatin	CAST	>tr|A0A0C4DGB5|A0A0C4DGB5_HUMAN Calpastatin OS=Homo sapiens GN=CAST PE=1 SV=1;>tr|E7ES10|E7ES10_HUMAN Calpastatin (Fragment) OS=Homo sapiens GN=CAST PE=1 SV=1;>tr|B7Z5T9|B7Z5T9_HUMAN cDNA FLJ50632, highly similar to Calpastatin OS=Homo sapiens PE=2 SV=1;>t	39	8	8	8	1	0	5	3	1	1	2	2	0	0	0	0	3	3	2	2	3	2	1	1	4	3	1	0	5	3	1	1	2	2	0	0	0	0	3	3	2	2
A0A0C4DGE4;Q7Z338;A0A0J9YW33;Q53YE2;Q13277;B4DE70	A0A0C4DGE4;Q7Z338;A0A0J9YW33;Q53YE2;Q13277;B4DE70	14;14;14;14;14;8	14;14;14;14;14;8	14;14;14;14;14;8	Syntaxin-3	DKFZp686L1857;STX3A;STX3	>tr|A0A0C4DGE4|A0A0C4DGE4_HUMAN Syntaxin-3 (Fragment) OS=Homo sapiens GN=STX3 PE=1 SV=1;>tr|Q7Z338|Q7Z338_HUMAN Putative uncharacterized protein DKFZp686L1857 OS=Homo sapiens GN=DKFZp686L1857 PE=2 SV=1;>tr|A0A0J9YW33|A0A0J9YW33_HUMAN Syntaxin-3 OS=Homo sap	6	14	14	14	3	3	8	8	7	7	3	3	4	3	2	3	7	8	4	5	6	6	6	8	8	9	3	3	8	8	7	7	3	3	4	3	2	3	7	8	4	5
A0A0C4DGN4;C3PTT6;G8H6I3;Q96DA0;I3L1H9;I3L3X0	A0A0C4DGN4;C3PTT6;G8H6I3;Q96DA0	8;8;8;8;2;2	8;8;8;8;2;2	8;8;8;8;2;2	Zymogen granule protein 16 homolog B	PAUF;EECP;ZG16B	>tr|A0A0C4DGN4|A0A0C4DGN4_HUMAN Zymogen granule protein 16 homolog B OS=Homo sapiens GN=ZG16B PE=1 SV=1;>tr|C3PTT6|C3PTT6_HUMAN Pancreatic adenocarcinoma upregulated factor OS=Homo sapiens GN=PAUF PE=1 SV=1;>tr|G8H6I3|G8H6I3_HUMAN Endocrine and exocrine pr	6	8	8	8	5	5	6	6	8	8	2	2	4	4	3	3	3	3	6	6	6	6	7	7	5	5	5	5	6	6	8	8	2	2	4	4	3	3	3	3	6	6
A0A0C4DGQ5;P04632;K7ELJ7;U3KQE2;A0A075B7C0;K7EIV0;K7EM73;U3KPR7;Q96L46;K7EMQ1;K7ES78	A0A0C4DGQ5;P04632;K7ELJ7;U3KQE2;A0A075B7C0;K7EIV0;K7EM73	13;13;12;11;11;10;7;6;3;2;1	13;13;12;11;11;10;7;6;3;2;1	3;3;3;3;3;3;3;0;0;0;0	Calpain small subunit 1	CAPNS1	>tr|A0A0C4DGQ5|A0A0C4DGQ5_HUMAN Calpain small subunit 1 OS=Homo sapiens GN=CAPNS1 PE=1 SV=1;>sp|P04632|CPNS1_HUMAN Calpain small subunit 1 OS=Homo sapiens GN=CAPNS1 PE=1 SV=1;>tr|K7ELJ7|K7ELJ7_HUMAN Calpain small subunit 1 OS=Homo sapiens GN=CAPNS1 PE=1 SV	11	13	13	3	6	6	7	7	7	8	3	4	8	7	3	4	7	9	5	5	5	5	5	5	6	6	6	6	7	7	7	8	3	4	8	7	3	4	7	9	5	5
A0A0C4DGV8;Q13214;Q6PI51;B4DEK9;Q9HBR1;Q59FY7;A0A087WZE0	A0A0C4DGV8;Q13214;Q6PI51;B4DEK9;Q9HBR1;Q59FY7	6;6;4;3;3;3;1	6;6;4;3;3;3;1	6;6;4;3;3;3;1	Semaphorin-3B	SEMA3B	>tr|A0A0C4DGV8|A0A0C4DGV8_HUMAN Semaphorin-3B OS=Homo sapiens GN=SEMA3B PE=1 SV=1;>sp|Q13214|SEM3B_HUMAN Semaphorin-3B OS=Homo sapiens GN=SEMA3B PE=2 SV=1;>tr|Q6PI51|Q6PI51_HUMAN SEMA3B protein (Fragment) OS=Homo sapiens GN=SEMA3B PE=2 SV=1;>tr|B4DEK9|B4DE	7	6	6	6	0	0	1	1	4	3	2	1	2	2	1	0	2	2	0	1	0	0	1	1	0	0	0	0	1	1	4	3	2	1	2	2	1	0	2	2	0	1
A0A0C5BIK5;Q6J9G0;H0YGL5	A0A0C5BIK5;Q6J9G0	5;5;1	5;5;1	5;5;1	Tyrosine-protein kinase STYK1	STYK1	>tr|A0A0C5BIK5|A0A0C5BIK5_HUMAN NOK mRNA OS=Homo sapiens PE=2 SV=1;>sp|Q6J9G0|STYK1_HUMAN Tyrosine-protein kinase STYK1 OS=Homo sapiens GN=STYK1 PE=1 SV=4	3	5	5	5	0	0	1	1	2	2	1	1	0	0	0	0	1	1	0	0	0	0	1	2	0	0	0	0	1	1	2	2	1	1	0	0	0	0	1	1	0	0
A0A0D9SEM9	A0A0D9SEM9	2	1	1			>tr|A0A0D9SEM9|A0A0D9SEM9_HUMAN ATP-dependent RNA helicase DDX39A (Fragment) OS=Homo sapiens GN=DDX39A PE=1 SV=1	1	2	1	1	0	0	1	1	1	1	0	0	0	0	0	0	1	1	0	0	0	0	0	0	0	0	0	0	1	1	0	0	0	0	0	0	0	0	1	1	0	0
A0A0R4J2G7;A0A0D9SEP4;A0A1D5RMU6;E7ERL8;Q9ULB1;F5GYC7;F8WB18;A0A0U1RRK7;A0A0D9SF07;A0A0D9SF36;A4FVB9;A0A0D9SEM5;E7ETA5;P58400	A0A0R4J2G7;A0A0D9SEP4;A0A1D5RMU6;E7ERL8;Q9ULB1;F5GYC7;F8WB18;A0A0U1RRK7	5;5;5;5;5;4;4;4;1;1;1;1;1;1	5;5;5;5;5;4;4;4;1;1;1;1;1;1	5;5;5;5;5;4;4;4;1;1;1;1;1;1	Neurexin-1	NRXN1	>tr|A0A0R4J2G7|A0A0R4J2G7_HUMAN Neurexin-1-beta OS=Homo sapiens GN=NRXN1 PE=1 SV=1;>tr|A0A0D9SEP4|A0A0D9SEP4_HUMAN Neurexin-1-beta OS=Homo sapiens GN=NRXN1 PE=1 SV=1;>tr|A0A1D5RMU6|A0A1D5RMU6_HUMAN Neurexin-1-beta OS=Homo sapiens GN=NRXN1 PE=4 SV=1;>tr|E7E	14	5	5	5	0	0	0	0	0	0	3	5	0	0	0	0	0	0	0	0	0	0	0	0	0	0	0	0	0	0	0	0	3	5	0	0	0	0	0	0	0	0
A0A0D9SFB3;A0A0D9SG12;B5BTY4;Q59GX6;A0A0D9SF53;O00571;A0A024R9A4;O15523;Q5S4N1;B4DLU5;B4E010;B4E132;A0A0J9YVQ7;C9J081;A0A087WVZ1;C9J8G5;B4E3C4;J3QSF1;J3KRZ1;Q7Z2V5;B4DZQ7;Q59E92;B4DNG2;B4DN41;J3KTA4;B5BUE6;H3BLZ8;Q59F66;P17844;Q92841	A0A0D9SFB3;A0A0D9SG12;B5BTY4;Q59GX6;A0A0D9SF53;O00571;A0A024R9A4;O15523;Q5S4N1;B4DLU5	17;17;17;17;17;17;13;13;12;9;8;7;5;3;2;2;2;1;1;1;1;1;1;1;1;1;1;1;1;1	17;17;17;17;17;17;13;13;12;9;8;7;5;3;2;2;2;1;1;1;1;1;1;1;1;1;1;1;1;1	17;17;17;17;17;17;13;13;12;9;8;7;5;3;2;2;2;1;1;1;1;1;1;1;1;1;1;1;1;1	ATP-dependent RNA helicase DDX3X;ATP-dependent RNA helicase DDX3Y	DDX3X;DDX3Y	>tr|A0A0D9SFB3|A0A0D9SFB3_HUMAN ATP-dependent RNA helicase DDX3X OS=Homo sapiens GN=DDX3X PE=1 SV=1;>tr|A0A0D9SG12|A0A0D9SG12_HUMAN ATP-dependent RNA helicase DDX3X OS=Homo sapiens GN=DDX3X PE=1 SV=1;>tr|B5BTY4|B5BTY4_HUMAN ATP-dependent RNA helicase DDX3X	30	17	17	17	2	3	7	8	9	9	0	0	4	6	0	0	8	8	3	3	5	4	3	3	8	6	2	3	7	8	9	9	0	0	4	6	0	0	8	8	3	3
A0A1B0GVH3;B7Z475;A0A0D9SF63;Q9BZK7;B4DP68;A0A024R189;Q59F53;A0A024RBV9;Q9BQ87;O60907	A0A1B0GVH3;B7Z475;A0A0D9SF63;Q9BZK7	3;3;3;3;1;1;1;1;1;1	3;3;3;3;1;1;1;1;1;1	3;3;3;3;1;1;1;1;1;1	F-box-like/WD repeat-containing protein TBL1XR1	TBL1XR1	>tr|A0A1B0GVH3|A0A1B0GVH3_HUMAN F-box-like/WD repeat-containing protein TBL1XR1 (Fragment) OS=Homo sapiens GN=TBL1XR1 PE=1 SV=1;>tr|B7Z475|B7Z475_HUMAN cDNA FLJ55712, highly similar to F-box-like/WD repeat protein TBL1XR1 OS=Homo sapiens PE=2 SV=1;>tr|A0A0	10	3	3	3	0	0	1	1	1	1	2	2	0	0	0	0	1	1	0	0	0	0	2	2	1	1	0	0	1	1	1	1	2	2	0	0	0	0	1	1	0	0
A0A0D9SGC1;E7EW20;Q9UM54	A0A0D9SGC1;E7EW20;Q9UM54	45;45;45	1;1;1	1;1;1	Unconventional myosin-VI	MYO6	>tr|A0A0D9SGC1|A0A0D9SGC1_HUMAN Unconventional myosin-VI OS=Homo sapiens GN=MYO6 PE=1 SV=1;>tr|E7EW20|E7EW20_HUMAN Unconventional myosin-VI OS=Homo sapiens GN=MYO6 PE=1 SV=2;>sp|Q9UM54|MYO6_HUMAN Unconventional myosin-VI OS=Homo sapiens GN=MYO6 PE=1 SV=4	3	45	1	1	11	14	20	22	30	28	9	9	14	16	4	3	26	27	10	9	9	11	19	18	24	22	0	0	0	0	0	0	0	0	1	1	0	0	0	0	0	0
A0A0F7NGI8;Q32MZ4;Q05D04;B4DPC0	A0A0F7NGI8;Q32MZ4;Q05D04	14;14;10;6	14;14;10;6	13;13;9;5	Leucine-rich repeat flightless-interacting protein 1	LRRFIP1	>tr|A0A0F7NGI8|A0A0F7NGI8_HUMAN Leucine rich repeat (In FLII) interacting protein 1, isoform CRA_c OS=Homo sapiens GN=LRRFIP1 PE=2 SV=1;>sp|Q32MZ4|LRRF1_HUMAN Leucine-rich repeat flightless-interacting protein 1 OS=Homo sapiens GN=LRRFIP1 PE=1 SV=2;>tr|Q05	4	14	14	13	1	1	3	3	2	3	5	5	4	4	0	0	7	8	5	5	4	3	3	3	8	7	1	1	3	3	2	3	5	5	4	4	0	0	7	8	5	5
A0A0F7TBJ0;A2N0T4;A2N0U3;A2N0U2;A2N0U1;A2N0T7;A2N0S5;A2N0T9;A2N0T5;A2N0T8;A2N0T2;A2N0S9;Q9UL74;A2N0T6;A2N0T0;A2N0S7;A2N0S6;A0A0B4J1U7;Q9UL75;A0A120HG39	A0A0F7TBJ0	3;1;1;1;1;1;1;1;1;1;1;1;1;1;1;1;1;1;1;1	1;1;1;1;1;1;1;1;1;1;1;1;1;1;1;1;1;1;1;1	1;1;1;1;1;1;1;1;1;1;1;1;1;1;1;1;1;1;1;1			>tr|A0A0F7TBJ0|A0A0F7TBJ0_HUMAN IGHV3-72 protein (Fragment) OS=Homo sapiens GN=IGHV3-72 PE=4 SV=1	20	3	1	1	0	0	3	3	1	1	0	0	0	0	1	1	1	1	0	0	1	1	0	0	1	1	0	0	1	1	1	1	0	0	0	0	1	1	1	1	0	0
H9KV28;A0RZB8;A0A140T8Z0;Q6URC4;A0A0G2JH68;O60610;B4DVR3;Q96IL1;Q7KZJ7;Q6UUU0;A0RZB7	H9KV28;A0RZB8;A0A140T8Z0;Q6URC4;A0A0G2JH68;O60610;B4DVR3	10;10;10;10;10;10;5;4;3;1;1	10;10;10;10;10;10;5;4;3;1;1	10;10;10;10;10;10;5;4;3;1;1	Protein diaphanous homolog 1	DIAPH1	>tr|H9KV28|H9KV28_HUMAN Protein diaphanous homolog 1 OS=Homo sapiens GN=DIAPH1 PE=1 SV=2;>tr|A0RZB8|A0RZB8_HUMAN Diaphanous-1 OS=Homo sapiens GN=DIAPH1 PE=2 SV=1;>tr|A0A140T8Z0|A0A140T8Z0_HUMAN Protein diaphanous homolog 1 OS=Homo sapiens GN=DIAPH1 PE=1 SV	11	10	10	10	0	0	4	3	1	3	1	1	2	2	0	0	2	2	0	0	0	0	3	3	6	7	0	0	4	3	1	3	1	1	2	2	0	0	2	2	0	0
P0DMV9;P0DMV8;A8K5I0;A0A0G2JIW1;Q59EJ3;B4DNT8;B4DI39;B4DWK5;B4DFN9;B4E1S9;B4E388;B4DVU9;V9GZ37;B3KTT5;B4DNX1;B4E1T6;B4DNV4;Q9UQC1	P0DMV9;P0DMV8;A8K5I0;A0A0G2JIW1;Q59EJ3;B4DNT8;B4DI39;B4DWK5;B4DFN9;B4E1S9;B4E388;B4DVU9;V9GZ37;B3KTT5;B4DNX1;B4E1T6	42;42;42;42;40;38;38;38;36;32;32;31;28;28;24;21;10;9	42;42;42;42;40;38;38;38;36;32;32;31;28;28;24;21;10;9	22;22;22;22;21;20;18;18;18;16;17;15;14;14;12;11;4;5		HEL-S-103;HSPA1A	>sp|P0DMV9|HS71B_HUMAN Heat shock 70 kDa protein 1B OS=Homo sapiens GN=HSPA1B PE=1 SV=1;>sp|P0DMV8|HS71A_HUMAN Heat shock 70 kDa protein 1A OS=Homo sapiens GN=HSPA1A PE=1 SV=1;>tr|A8K5I0|A8K5I0_HUMAN Epididymis secretory protein Li 103 OS=Homo sapiens GN=H	18	42	42	22	22	24	25	26	26	28	19	19	29	29	15	15	31	32	21	21	28	31	23	23	28	30	22	24	25	26	26	28	19	19	29	29	15	15	31	32	21	21
B3KNX9;A8K0A4;A0A0G2JJD3;O95870;A0A0G2JI89	B3KNX9;A8K0A4;A0A0G2JJD3;O95870	4;4;4;4;1	4;4;4;4;1	4;4;4;4;1	Abhydrolase domain-containing protein 16A	BAT5;ABHD16A	>tr|B3KNX9|B3KNX9_HUMAN HLA-B associated transcript 5, isoform CRA_a OS=Homo sapiens GN=BAT5 PE=2 SV=1;>tr|A8K0A4|A8K0A4_HUMAN cDNA FLJ77631, highly similar to Homo sapiens HLA-B associated transcript 5 (BAT5), mRNA OS=Homo sapiens PE=2 SV=1;>tr|A0A0G2JJD3	5	4	4	4	0	0	0	0	3	3	0	0	0	0	0	0	1	1	0	0	0	0	0	0	0	0	0	0	0	0	3	3	0	0	0	0	0	0	1	1	0	0
A0A0G2JRT3;A0A0G2JRB3;A0A0G2JP19;A0A0G2JNC9;A0A0G2JMZ2;A6NM11;Q5YKG5;B7ZMC4;A0A0J9YWT4;A8MUI5;A0A0G2JS48;A0A0J9YVP4;A0A0G2JNP1;O60309;A6NMS7;A0A0J9YVT7;A0A0G2JQV0;A0A0G2JQI7;B7Z9I0;B4DSF2;A0A0G2JRA3;E9PP10;J3QTJ5;B4DG20;J3QL27;F8W7X0;A0JLV1;B3KRJ4;J3KT91;J3QKQ2;J3KT96	A0A0G2JRT3;A0A0G2JRB3;A0A0G2JP19;A0A0G2JNC9;A0A0G2JMZ2;A6NM11;Q5YKG5;B7ZMC4;A0A0J9YWT4;A8MUI5;A0A0G2JS48;A0A0J9YVP4;A0A0G2JNP1;O60309;A6NMS7;A0A0J9YVT7;A0A0G2JQV0;A0A0G2JQI7;B7Z9I0;B4DSF2;A0A0G2JRA3;E9PP10;J3QTJ5;B4DG20;J3QL27;F8W7X0;A0JLV1	10;10;10;10;10;10;9;9;9;9;9;9;9;9;9;8;8;8;7;7;7;7;7;7;5;5;5;4;3;2;1	7;7;7;7;7;7;7;7;7;6;6;7;6;7;6;6;6;6;6;6;5;5;5;5;3;4;4;4;1;1;1	7;7;7;7;7;7;7;7;7;6;6;7;6;7;6;6;6;6;6;6;5;5;5;5;3;4;4;4;1;1;1	Leucine-rich repeat-containing protein 37A2;Leucine-rich repeat-containing protein 37A3;Leucine-rich repeat-containing protein 37A	LRRC37A2;LRRC37A;LRRC37A3	>tr|A0A0G2JRT3|A0A0G2JRT3_HUMAN Uncharacterized protein OS=Homo sapiens PE=4 SV=1;>tr|A0A0G2JRB3|A0A0G2JRB3_HUMAN Leucine-rich repeat-containing protein 37A OS=Homo sapiens GN=LRRC37A PE=4 SV=1;>tr|A0A0G2JP19|A0A0G2JP19_HUMAN Leucine-rich repeat-containing	31	10	7	7	1	1	0	0	9	10	0	0	3	2	1	1	2	3	1	1	1	0	0	1	1	1	1	1	0	0	6	7	0	0	2	1	1	1	1	2	0	0
A0A0G2JN42;Q6W4X9	A0A0G2JN42;Q6W4X9	57;57	1;1	1;1	Mucin-6	MUC6	>tr|A0A0G2JN42|A0A0G2JN42_HUMAN Mucin-6 OS=Homo sapiens GN=MUC6 PE=1 SV=1;>sp|Q6W4X9|MUC6_HUMAN Mucin-6 OS=Homo sapiens GN=MUC6 PE=1 SV=3	2	57	1	1	33	33	32	33	42	44	35	35	39	39	24	26	35	32	20	21	31	32	28	28	36	36	0	0	1	1	0	0	0	0	0	0	0	0	0	0	0	0
A8MZA0;A0A0G2JN59;A0A0G2JNX7;A0A0A0MRG4	A8MZA0;A0A0G2JN59	5;5;2;2	5;5;2;2	3;3;2;2		SPAG11B	>tr|A8MZA0|A8MZA0_HUMAN Sperm-associated antigen 11B OS=Homo sapiens GN=SPAG11B PE=4 SV=1;>tr|A0A0G2JN59|A0A0G2JN59_HUMAN Sperm-associated antigen 11B OS=Homo sapiens GN=SPAG11B PE=4 SV=1	4	5	5	3	0	0	0	0	3	3	0	0	3	3	3	3	5	5	3	3	0	0	0	0	0	0	0	0	0	0	3	3	0	0	3	3	3	3	5	5	3	3
A0A0G2JNJ8;E9PJC5	A0A0G2JNJ8	57;8	57;8	1;0			>tr|A0A0G2JNJ8|A0A0G2JNJ8_HUMAN Mucin-6 OS=Homo sapiens GN=MUC6 PE=1 SV=1	2	57	57	1	33	33	31	32	43	45	35	35	39	39	24	26	35	32	20	21	31	32	28	28	36	36	33	33	31	32	43	45	35	35	39	39	24	26	35	32	20	21
A0A0J9YXX1;A0A0C4DH38;A0A0F7TAV4;A0A0F7T8B3;A0A125QYY4	A0A0J9YXX1;A0A0C4DH38	3;2;1;1;1	1;1;1;0;1	1;1;1;0;1			>tr|A0A0J9YXX1|A0A0J9YXX1_HUMAN Uncharacterized protein (Fragment) OS=Homo sapiens PE=1 SV=1;>tr|A0A0C4DH38|A0A0C4DH38_HUMAN Protein IGHV5-51 (Fragment) OS=Homo sapiens GN=IGHV5-51 PE=1 SV=1	5	3	1	1	0	0	3	3	0	1	1	1	0	0	1	1	0	0	0	0	0	0	0	0	0	1	0	0	1	1	0	0	0	0	0	0	0	0	0	0	0	0
H0YKP3;C9IZA2;D9YZV5;D9YZV4;A0A0S2Z4G6;A0A0K0K1I0;P09493;A0A024R5W6;Q6ZN40;H0YL52;H0YKZ6;A0A087WTJ7;H0YLS7	H0YKP3;C9IZA2;D9YZV5;D9YZV4;A0A0S2Z4G6;A0A0K0K1I0;P09493;A0A024R5W6;Q6ZN40;H0YL52;H0YKZ6;A0A087WTJ7	6;6;6;6;6;6;6;5;5;4;3;3;2	3;3;3;3;3;3;3;2;2;1;3;3;2	3;3;3;3;3;3;3;2;2;1;3;3;2	Tropomyosin alpha-1 chain	TPM1	>tr|H0YKP3|H0YKP3_HUMAN Tropomyosin alpha-1 chain OS=Homo sapiens GN=TPM1 PE=1 SV=1;>tr|C9IZA2|C9IZA2_HUMAN cDNA FLJ26372 fis, clone HRT06233 OS=Homo sapiens PE=2 SV=2;>tr|D9YZV5|D9YZV5_HUMAN Tropomyosin 1 (Alpha) isoform 4 OS=Homo sapiens GN=TPM1 PE=3 SV=	13	6	3	3	0	0	2	2	3	3	1	1	2	2	1	1	1	1	4	4	2	2	3	2	1	1	0	0	1	1	1	1	1	1	0	0	0	0	0	0	2	2
A0A0K0K1I1;P54107;A8K8Y2	A0A0K0K1I1;P54107;A8K8Y2	14;14;13	14;14;13	14;14;13	Cysteine-rich secretory protein 1	CRISP1	>tr|A0A0K0K1I1|A0A0K0K1I1_HUMAN Cysteine-rich secretory protein 1 OS=Homo sapiens GN=HEL-S-57 PE=2 SV=1;>sp|P54107|CRIS1_HUMAN Cysteine-rich secretory protein 1 OS=Homo sapiens GN=CRISP1 PE=1 SV=1;>tr|A8K8Y2|A8K8Y2_HUMAN cDNA FLJ75803, highly similar to Ho	3	14	14	14	7	7	11	10	12	12	9	9	10	11	10	9	10	10	7	8	10	9	8	8	9	9	7	7	11	10	12	12	9	9	10	11	10	9	10	10	7	8
B2RU30;A0A0K0K1I4;Q8NG35	B2RU30;A0A0K0K1I4;Q8NG35	2;2;2	2;2;2	2;2;2	Beta-defensin;Beta-defensin 105	DEFB105B;DEFB105A	>tr|B2RU30|B2RU30_HUMAN Beta-defensin OS=Homo sapiens GN=DEFB105B PE=2 SV=1;>tr|A0A0K0K1I4|A0A0K0K1I4_HUMAN Beta-defensin OS=Homo sapiens GN=HEL-S-289 PE=2 SV=1;>sp|Q8NG35|D105A_HUMAN Beta-defensin 105 OS=Homo sapiens GN=DEFB105A PE=2 SV=1	3	2	2	2	1	1	1	1	2	2	1	0	1	1	0	0	2	2	0	0	0	0	0	0	1	1	1	1	1	1	2	2	1	0	1	1	0	0	2	2	0	0
A0A0K0K1J0	A0A0K0K1J0	11	11	2			>tr|A0A0K0K1J0|A0A0K0K1J0_HUMAN Epididymis secretory protein Li 292 OS=Homo sapiens GN=HEL-S-292 PE=2 SV=1	1	11	11	2	0	0	3	3	9	10	5	5	3	2	4	3	4	4	3	3	0	0	0	0	0	0	0	0	3	3	9	10	5	5	3	2	4	3	4	4	3	3
A0A0K0K1J1;P01034	A0A0K0K1J1;P01034	8;8	8;8	8;8	Cystatin-C	CST3	>tr|A0A0K0K1J1|A0A0K0K1J1_HUMAN Cystatin OS=Homo sapiens GN=HEL-S-2 PE=2 SV=1;>sp|P01034|CYTC_HUMAN Cystatin-C OS=Homo sapiens GN=CST3 PE=1 SV=1	2	8	8	8	5	5	5	5	5	6	5	5	5	6	3	3	6	6	3	3	6	6	5	6	7	6	5	5	5	5	5	6	5	5	5	6	3	3	6	6	3	3
Q9H6R1;B3KS41;A8K6Z0;A0A0U1RRL8;A0A0K0K1J9;Q8TB22;H0Y9W3;B3KWT9	Q9H6R1;B3KS41;A8K6Z0;A0A0U1RRL8;A0A0K0K1J9;Q8TB22;H0Y9W3;B3KWT9	2;2;2;2;2;2;1;1	2;2;2;2;2;2;1;1	2;2;2;2;2;2;1;1	Spermatogenesis-associated protein 20	SPATA20	>tr|Q9H6R1|Q9H6R1_HUMAN cDNA: FLJ21969 fis, clone HEP05692 OS=Homo sapiens PE=2 SV=1;>tr|B3KS41|B3KS41_HUMAN cDNA FLJ35412 fis, clone SMINT2000441, highly similar to Homo sapiens spermatogenesis associated 20 (SPATA20), mRNA OS=Homo sapiens PE=2 SV=1;>tr|A	8	2	2	2	0	0	0	0	2	2	0	0	0	0	0	0	0	0	0	0	0	0	0	0	0	0	0	0	0	0	2	2	0	0	0	0	0	0	0	0	0	0
A0A0K0K1K1;O14556;K7EP73;K7EMB2;Q5JS36	A0A0K0K1K1;O14556	16;16;4;1;1	15;15;4;1;1	15;15;4;1;1	Glyceraldehyde-3-phosphate dehydrogenase, testis-specific	GAPDHS	>tr|A0A0K0K1K1|A0A0K0K1K1_HUMAN Glyceraldehyde-3-phosphate dehydrogenase OS=Homo sapiens GN=HEL-S-278 PE=2 SV=1;>sp|O14556|G3PT_HUMAN Glyceraldehyde-3-phosphate dehydrogenase, testis-specific OS=Homo sapiens GN=GAPDHS PE=1 SV=2	5	16	15	15	1	1	1	1	15	16	0	0	3	3	1	1	1	1	0	0	1	1	1	1	1	1	0	0	0	0	14	15	0	0	2	2	0	0	0	0	0	0
Q05DH1;A0A0K0K1K4;O14818;H0UI83;H0Y586	Q05DH1;A0A0K0K1K4;O14818;H0UI83	15;15;15;8;7	15;15;15;8;7	10;10;10;5;5	Proteasome subunit alpha type;Proteasome subunit alpha type-7	PSMA7;hCG_41772	>tr|Q05DH1|Q05DH1_HUMAN Proteasome subunit alpha type (Fragment) OS=Homo sapiens GN=PSMA7 PE=2 SV=1;>tr|A0A0K0K1K4|A0A0K0K1K4_HUMAN Proteasome subunit alpha type OS=Homo sapiens GN=HEL-S-276 PE=2 SV=1;>sp|O14818|PSA7_HUMAN Proteasome subunit alpha type-7 O	5	15	15	10	6	6	7	8	12	11	4	4	5	5	6	7	8	8	3	3	5	5	4	4	8	9	6	6	7	8	12	11	4	4	5	5	6	7	8	8	3	3
A0A0K0K1K7;O95336;M0R261;M0R0U3;M0R1L2	A0A0K0K1K7;O95336;M0R261;M0R0U3	13;13;9;7;5	13;13;9;7;5	13;13;9;7;5	6-phosphogluconolactonase	PGLS	>tr|A0A0K0K1K7|A0A0K0K1K7_HUMAN 6-phosphogluconolactonase, isoform CRA_b OS=Homo sapiens GN=HEL-S-304 PE=2 SV=1;>sp|O95336|6PGL_HUMAN 6-phosphogluconolactonase OS=Homo sapiens GN=PGLS PE=1 SV=2;>tr|M0R261|M0R261_HUMAN 6-phosphogluconolactonase (Fragment) O	5	13	13	13	4	5	5	6	8	8	4	4	3	4	0	0	8	8	3	3	3	3	4	4	4	4	4	5	5	6	8	8	4	4	3	4	0	0	8	8	3	3
A0A0K0K1L8;Q06323;Q6FHU3;Q86SZ9;H0YLU2;H0YKK6	A0A0K0K1L8;Q06323;Q6FHU3;Q86SZ9	18;18;17;10;7;6	18;18;17;10;7;6	18;18;17;10;7;6	Proteasome activator complex subunit 1	PSME1	>tr|A0A0K0K1L8|A0A0K0K1L8_HUMAN Epididymis secretory sperm binding protein Li 129m OS=Homo sapiens GN=HEL-S-129m PE=2 SV=1;>sp|Q06323|PSME1_HUMAN Proteasome activator complex subunit 1 OS=Homo sapiens GN=PSME1 PE=1 SV=1;>tr|Q6FHU3|Q6FHU3_HUMAN PSME1 protei	6	18	18	18	11	11	13	13	13	13	5	6	14	13	4	4	13	13	9	9	12	12	14	14	15	15	11	11	13	13	13	13	5	6	14	13	4	4	13	13	9	9
A0A0S2A4E4;A0A0M4G3H8;P35573;G1UI17;A0A1C7CYW1	A0A0S2A4E4;A0A0M4G3H8;P35573;G1UI17	44;44;44;36;1	44;44;44;36;1	44;44;44;36;1	Glycogen debranching enzyme;4-alpha-glucanotransferase;Amylo-alpha-1,6-glucosidase	AGL	>tr|A0A0S2A4E4|A0A0S2A4E4_HUMAN Amylo-1, 6-glucosidase, 4-alpha-glucanotransferase (Glycogen debranching enzyme, glycogen storage disease type III), isoform CRA_b OS=Homo sapiens GN=AGL PE=4 SV=1;>tr|A0A0M4G3H8|A0A0M4G3H8_HUMAN Amylo-alpha-1, 6-glucosidase	5	44	44	44	8	7	12	10	16	16	11	12	13	15	2	1	25	23	12	13	19	16	11	12	15	14	8	7	12	10	16	16	11	12	13	15	2	1	25	23	12	13
A0A0S2Z377;A0A0S2Z2Z6;P08133;A8K3Q7;B7Z582;E5RK69;Q6ZP35;E7EMC6;A0A0S2Z301;E5RJF5;E5RK63;E5RFF0;E5RI05;E5RJR0;E5RIU8;H0YC77	A0A0S2Z377;A0A0S2Z2Z6;P08133;A8K3Q7;B7Z582;E5RK69;Q6ZP35;E7EMC6	43;41;41;40;32;29;23;23;11;10;10;9;8;6;5;3	43;41;41;40;32;29;23;23;11;10;10;9;8;6;5;3	43;41;41;40;32;29;23;23;11;10;10;9;8;6;5;3	Annexin A6;Annexin	ANXA6	>tr|A0A0S2Z377|A0A0S2Z377_HUMAN Annexin (Fragment) OS=Homo sapiens GN=ANXA6 PE=2 SV=1;>tr|A0A0S2Z2Z6|A0A0S2Z2Z6_HUMAN Annexin (Fragment) OS=Homo sapiens GN=ANXA6 PE=2 SV=1;>sp|P08133|ANXA6_HUMAN Annexin A6 OS=Homo sapiens GN=ANXA6 PE=1 SV=3;>tr|A8K3Q7|A8K3	16	43	43	43	27	26	27	29	35	35	11	13	25	25	21	21	35	35	19	20	27	27	28	30	34	34	27	26	27	29	35	35	11	13	25	25	21	21	35	35	19	20
A0A0S2Z3I6;A0A0S2Z392;P25098;E9PRV7;A8K869;A0A024R1D8;P35626;Q59F73;Q8N433	A0A0S2Z3I6;A0A0S2Z392;P25098;E9PRV7;A8K869;A0A024R1D8;P35626	10;10;10;7;5;5;5;3;2	10;10;10;7;5;5;5;3;2	10;10;10;7;5;5;5;3;2	Beta-adrenergic receptor kinase 1;Beta-adrenergic receptor kinase 2	ADRBK1;ADRBK2	>tr|A0A0S2Z3I6|A0A0S2Z3I6_HUMAN Protein-serine/threonine kinase (Fragment) OS=Homo sapiens GN=ADRBK1 PE=2 SV=1;>tr|A0A0S2Z392|A0A0S2Z392_HUMAN Protein-serine/threonine kinase (Fragment) OS=Homo sapiens GN=ADRBK1 PE=2 SV=1;>sp|P25098|ARBK1_HUMAN Beta-adrene	9	10	10	10	0	0	3	2	5	5	2	2	0	0	0	0	4	3	2	2	1	1	1	1	3	3	0	0	3	2	5	5	2	2	0	0	0	0	4	3	2	2
A0A0S2Z3D5;P02649;J9ZVQ3;H0Y7L5;A0A0S2Z3V0;E9PEV4;E7ERP7;Q6LBZ1;A0A0S2Z3J5;A0A0S2Z3B1;D9ZB55;CON__Q03247;Q6LA97;Q6ZP45;Q13791;Q8TCZ8	A0A0S2Z3D5;P02649;J9ZVQ3;H0Y7L5;A0A0S2Z3V0;E9PEV4;E7ERP7	22;22;19;15;11;11;11;10;8;8;5;5;3;3;1;1	22;22;19;15;11;11;11;10;8;8;5;5;3;3;1;1	22;22;19;15;11;11;11;10;8;8;5;5;3;3;1;1	Apolipoprotein E	APOE	>tr|A0A0S2Z3D5|A0A0S2Z3D5_HUMAN Apolipoprotein E isoform 1 (Fragment) OS=Homo sapiens GN=APOE PE=2 SV=1;>sp|P02649|APOE_HUMAN Apolipoprotein E OS=Homo sapiens GN=APOE PE=1 SV=1;>tr|J9ZVQ3|J9ZVQ3_HUMAN Apolipoprotein E (Fragment) OS=Homo sapiens GN=APOE PE=	16	22	22	22	12	11	9	8	13	12	4	3	7	6	6	6	9	10	2	1	3	2	5	4	6	5	12	11	9	8	13	12	4	3	7	6	6	6	9	10	2	1
A0A0S2Z3G9;O43707;Q96BG6;B4E337;F5GXS2;B4DSX0;H7C144;A0A0S2Z3X3;A0A0S2Z3C0;B3W6H4;K7EP19	A0A0S2Z3G9;O43707;Q96BG6	55;55;39;27;26;24;19;15;14;4;3	55;55;39;27;26;24;19;15;14;4;3	28;28;23;8;20;5;15;9;8;1;1	Alpha-actinin-4	ACTN4	>tr|A0A0S2Z3G9|A0A0S2Z3G9_HUMAN Actinin alpha 4 isoform 1 (Fragment) OS=Homo sapiens GN=ACTN4 PE=2 SV=1;>sp|O43707|ACTN4_HUMAN Alpha-actinin-4 OS=Homo sapiens GN=ACTN4 PE=1 SV=2;>tr|Q96BG6|Q96BG6_HUMAN ACTN4 protein (Fragment) OS=Homo sapiens GN=ACTN4 PE=2	11	55	55	28	26	27	30	30	32	35	22	22	34	33	17	19	38	37	24	23	24	24	31	31	33	34	26	27	30	30	32	35	22	22	34	33	17	19	38	37	24	23
A0A0S2Z3H8;P63092;Q5JWF2;B0AZR9;Q14455;O60726;A0A0A0MR13;S4R3E3;Q8N2B4;A8K1Y9;P38405;B4DHG7;O75633;O75632;Q5JWE9;S4R3V9;Q5JWD1;H0Y7E8;K7EQ80;K7EPE2	A0A0S2Z3H8;P63092;Q5JWF2;B0AZR9;Q14455;O60726	22;22;22;21;21;11;10;7;6;6;6;5;4;4;4;3;2;2;2;2	1;1;1;1;1;0;0;1;0;0;0;0;0;0;1;1;1;1;0;0	1;1;1;1;1;0;0;1;0;0;0;0;0;0;1;1;1;1;0;0	Guanine nucleotide-binding protein G(s) subunit alpha isoforms short;Guanine nucleotide-binding protein G(s) subunit alpha isoforms XLas	GNAS;GSA	>tr|A0A0S2Z3H8|A0A0S2Z3H8_HUMAN GNAS complex locus isoform 1 (Fragment) OS=Homo sapiens GN=GNAS PE=2 SV=1;>sp|P63092|GNAS2_HUMAN Guanine nucleotide-binding protein G(s) subunit alpha isoforms short OS=Homo sapiens GN=GNAS PE=1 SV=1;>sp|Q5JWF2|GNAS1_HUMAN G	20	22	1	1	6	8	9	8	14	14	4	5	10	8	4	4	13	12	8	10	6	5	12	11	6	6	0	0	0	0	1	1	0	1	1	1	0	0	1	1	0	1
H7C5W9;A0A0S2Z3L2;P16615;A8K9K1;Q93084;Q8N3X5;Q7Z675;Q7Z6E5;O14983	H7C5W9;A0A0S2Z3L2;P16615;A8K9K1;Q93084	5;5;5;3;3;2;2;2;2	5;5;5;3;3;2;2;2;2	5;5;5;3;3;2;2;2;2	Sarcoplasmic/endoplasmic reticulum calcium ATPase 2;Calcium-transporting ATPase;Sarcoplasmic/endoplasmic reticulum calcium ATPase 3	ATP2A2;ATP2A3	>tr|H7C5W9|H7C5W9_HUMAN Sarcoplasmic/endoplasmic reticulum calcium ATPase 2 (Fragment) OS=Homo sapiens GN=ATP2A2 PE=1 SV=1;>tr|A0A0S2Z3L2|A0A0S2Z3L2_HUMAN ATPase Ca++ transporting cardiac muscle slow twitch 2 isoform 1 (Fragment) OS=Homo sapiens GN=ATP2A2	9	5	5	5	0	0	0	0	2	2	0	0	0	0	0	0	3	4	0	0	0	0	0	0	0	0	0	0	0	0	2	2	0	0	0	0	0	0	3	4	0	0
L7RT18;A0A0S2Z3Q4;P46108;A0A0S2Z3K9;I3L297	L7RT18;A0A0S2Z3Q4;P46108;A0A0S2Z3K9;I3L297	11;11;11;8;6	11;11;11;8;6	11;11;11;8;6	Adapter molecule crk	CRK	>tr|L7RT18|L7RT18_HUMAN V-crk sarcoma virus CT10 oncogene homolog (Avian) OS=Homo sapiens GN=CRK PE=4 SV=1;>tr|A0A0S2Z3Q4|A0A0S2Z3Q4_HUMAN V-crk sarcoma virus CT10 oncogene-like protein isoform 1 (Fragment) OS=Homo sapiens GN=CRK PE=2 SV=1;>sp|P46108|CRK_H	5	11	11	11	0	0	4	3	4	4	1	1	3	3	0	0	6	5	4	4	2	2	3	2	1	1	0	0	4	3	4	4	1	1	3	3	0	0	6	5	4	4
A0A0S2Z3S5;Q5FWY2	A0A0S2Z3S5;Q5FWY2	22;20	22;20	1;1		GNAS	>tr|A0A0S2Z3S5|A0A0S2Z3S5_HUMAN GNAS complex locus isoform 2 (Fragment) OS=Homo sapiens GN=GNAS PE=2 SV=1;>tr|Q5FWY2|Q5FWY2_HUMAN GNAS complex locus OS=Homo sapiens GN=GNAS PE=2 SV=2	2	22	22	1	6	8	9	8	14	13	4	4	9	7	4	4	13	12	8	9	6	5	13	12	7	7	6	8	9	8	14	13	4	4	9	7	4	4	13	12	8	9
A0A0S2Z3W3;P06865;H3BS10;H3BU85;H3BTD4;A0A0S2Z3L7;A0A0S2Z3U8;A0A0S2Z3X0;A0A087WUJ7;H3BVH8;H3BT62;H3BQ04	A0A0S2Z3W3;P06865;H3BS10;H3BU85;H3BTD4;A0A0S2Z3L7	26;26;24;15;15;14;5;3;3;2;2;2	26;26;24;15;15;14;5;3;3;2;2;2	2;2;2;2;2;2;2;2;2;2;2;2	Beta-hexosaminidase subunit alpha;Beta-hexosaminidase	HEXA	>tr|A0A0S2Z3W3|A0A0S2Z3W3_HUMAN Hexosaminidase A isoform 1 (Fragment) OS=Homo sapiens GN=HEXA PE=2 SV=1;>sp|P06865|HEXA_HUMAN Beta-hexosaminidase subunit alpha OS=Homo sapiens GN=HEXA PE=1 SV=2;>tr|H3BS10|H3BS10_HUMAN Beta-hexosaminidase OS=Homo sapiens GN	12	26	26	2	9	9	16	16	22	24	14	14	15	14	11	13	12	11	8	8	11	12	11	12	12	12	9	9	16	16	22	24	14	14	15	14	11	13	12	11	8	8
A0A0S2Z3W7;Q9BY32;A0A0S2Z423	A0A0S2Z3W7;Q9BY32;A0A0S2Z423	4;4;3	4;4;3	4;4;3	Inosine triphosphate pyrophosphatase	ITPA	>tr|A0A0S2Z3W7|A0A0S2Z3W7_HUMAN Nucleotide diphosphatase (Fragment) OS=Homo sapiens GN=ITPA PE=2 SV=1;>sp|Q9BY32|ITPA_HUMAN Inosine triphosphate pyrophosphatase OS=Homo sapiens GN=ITPA PE=1 SV=2;>tr|A0A0S2Z423|A0A0S2Z423_HUMAN Nucleotide diphosphatase (Fra	3	4	4	4	2	2	3	3	3	3	0	0	1	1	0	1	1	1	1	1	1	1	2	2	1	2	2	2	3	3	3	3	0	0	1	1	0	1	1	1	1	1
A0A0S2Z3X8;P31150;B4DHX4;B4DH24;B4E070;G5E9U5;A0A0S2Z426	A0A0S2Z3X8;P31150;B4DHX4	35;35;32;16;14;10;5	24;24;21;10;12;6;5	24;24;21;10;12;6;5	Rab GDP dissociation inhibitor alpha	GDI1	>tr|A0A0S2Z3X8|A0A0S2Z3X8_HUMAN GDP dissociation inhibitor 1 isoform 1 (Fragment) OS=Homo sapiens GN=GDI1 PE=2 SV=1;>sp|P31150|GDIA_HUMAN Rab GDP dissociation inhibitor alpha OS=Homo sapiens GN=GDI1 PE=1 SV=2;>tr|B4DHX4|B4DHX4_HUMAN cDNA FLJ52902, highly s	7	35	24	24	16	16	15	16	26	26	15	16	16	18	6	7	15	15	10	11	17	18	14	14	19	21	9	9	9	9	16	16	9	10	9	11	4	5	8	8	6	7
A0A0S2Z3Y1;Q08380;B4DVE1;B3KP88;B4DDG4;B4DI70;B4DWA8;K7EP36;K7ESM3;K7EKQ5;K7ERZ6;K7EJD3;K7ES75;K7EN99;K7EQT9;K7EJY8	A0A0S2Z3Y1;Q08380;B4DVE1;B3KP88;B4DDG4;B4DI70;B4DWA8	33;33;32;28;27;25;25;11;8;8;5;5;4;4;3;3	33;33;32;28;27;25;25;11;8;8;5;5;4;4;3;3	33;33;32;28;27;25;25;11;8;8;5;5;4;4;3;3	Galectin-3-binding protein	LGALS3BP	>tr|A0A0S2Z3Y1|A0A0S2Z3Y1_HUMAN Lectin galactoside-binding soluble 3 binding protein isoform 1 (Fragment) OS=Homo sapiens GN=LGALS3BP PE=2 SV=1;>sp|Q08380|LG3BP_HUMAN Galectin-3-binding protein OS=Homo sapiens GN=LGALS3BP PE=1 SV=1;>tr|B4DVE1|B4DVE1_HUMAN	16	33	33	33	18	18	20	20	29	28	15	15	18	19	18	17	18	18	9	9	15	16	15	16	20	20	18	18	20	20	29	28	15	15	18	19	18	17	18	18	9	9
B2RAT6;A0A0S2Z3Y7;P07902;D3DRM8;Q8N8Y3;G3V4G9;Q14388;G3V3U5;G3V223;F2Z2X9;B4DDJ1;B3KTV7;A0A0S2Z4I0;B4DT62;Q14367;Q14366;D0EM86;H0YJL3;Q14379	B2RAT6;A0A0S2Z3Y7;P07902;D3DRM8;Q8N8Y3;G3V4G9	6;6;6;5;3;3;2;2;2;2;2;2;2;2;1;1;1;1;1	6;6;6;5;3;3;2;2;2;2;2;2;2;2;1;1;1;1;1	6;6;6;5;3;3;2;2;2;2;2;2;2;2;1;1;1;1;1	Galactose-1-phosphate uridylyltransferase	GALT;hCG_2040046	>tr|B2RAT6|B2RAT6_HUMAN Galactose-1-phosphate uridylyltransferase OS=Homo sapiens PE=2 SV=1;>tr|A0A0S2Z3Y7|A0A0S2Z3Y7_HUMAN Galactose-1-phosphate uridylyltransferase (Fragment) OS=Homo sapiens GN=GALT PE=2 SV=1;>sp|P07902|GALT_HUMAN Galactose-1-phosphate u	19	6	6	6	0	0	2	2	0	0	3	3	1	1	0	0	2	2	3	3	0	0	2	2	2	2	0	0	2	2	0	0	3	3	1	1	0	0	2	2	3	3
B4DRR0;CON__P02538;A8K2I0;A0A0S2Z428;P02538;B4DRU6;B4DWU6;A0A0S2Z427	B4DRR0;CON__P02538;A8K2I0;A0A0S2Z428;P02538;B4DRU6;B4DWU6	47;47;47;47;47;45;43;8	4;4;4;4;4;3;2;2	2;2;2;2;2;2;1;1	Keratin, type II cytoskeletal 6A	KRT6A	>tr|B4DRR0|B4DRR0_HUMAN cDNA FLJ53910, highly similar to Keratin, type II cytoskeletal 6A OS=Homo sapiens PE=2 SV=1;>P02538 SWISS-PROT:P02538 Tax_Id=9606 Gene_Symbol=KRT6A Keratin, type II cytoskeletal 6A;>tr|A8K2I0|A8K2I0_HUMAN cDNA FLJ78504, highly simil	8	47	4	2	17	17	17	18	26	24	7	7	40	40	9	9	8	8	9	8	9	9	13	16	38	37	0	0	0	0	0	0	0	0	3	3	0	0	0	0	1	1
A0A0S2Z455;Q99574;A0A0S2Z463;C9JQU8;C9JDY5;H7C5T9	A0A0S2Z455;Q99574;A0A0S2Z463;C9JQU8;C9JDY5	6;6;3;3;3;2	6;6;3;3;3;2	6;6;3;3;3;2	Neuroserpin	SERPINI1	>tr|A0A0S2Z455|A0A0S2Z455_HUMAN Serpin peptidase inhibitor clade I member 1 isoform 1 (Fragment) OS=Homo sapiens GN=SERPINI1 PE=2 SV=1;>sp|Q99574|NEUS_HUMAN Neuroserpin OS=Homo sapiens GN=SERPINI1 PE=1 SV=1;>tr|A0A0S2Z463|A0A0S2Z463_HUMAN Serpin peptidase	6	6	6	6	2	2	0	0	1	0	2	2	3	3	1	1	3	3	0	0	6	6	3	2	3	3	2	2	0	0	1	0	2	2	3	3	1	1	3	3	0	0
A0A0S2Z475;A0A0S2Z4A3;A0A0S2Z4T6;O76083	A0A0S2Z475;A0A0S2Z4A3;A0A0S2Z4T6;O76083	12;12;12;12	12;12;12;12	12;12;12;12	High affinity cGMP-specific 3,5-cyclic phosphodiesterase 9A	PDE9A	>tr|A0A0S2Z475|A0A0S2Z475_HUMAN Phosphodiesterase (Fragment) OS=Homo sapiens GN=PDE9A PE=2 SV=1;>tr|A0A0S2Z4A3|A0A0S2Z4A3_HUMAN Phosphodiesterase (Fragment) OS=Homo sapiens GN=PDE9A PE=2 SV=1;>tr|A0A0S2Z4T6|A0A0S2Z4T6_HUMAN Phosphodiesterase (Fragment) OS=	4	12	12	12	0	0	3	2	5	4	1	1	1	0	0	0	9	8	0	0	0	1	2	2	3	2	0	0	3	2	5	4	1	1	1	0	0	0	9	8	0	0
A0A0S2Z489;O00232;A0A0S2Z476	A0A0S2Z489;O00232;A0A0S2Z476	13;13;7	13;13;7	13;13;7	26S proteasome non-ATPase regulatory subunit 12	PSMD12	>tr|A0A0S2Z489|A0A0S2Z489_HUMAN Proteasome (Prosome, macropain) 26S subunit, non-ATPase, 12, isoform CRA_a (Fragment) OS=Homo sapiens GN=PSMD12 PE=2 SV=1;>sp|O00232|PSD12_HUMAN 26S proteasome non-ATPase regulatory subunit 12 OS=Homo sapiens GN=PSMD12 PE=1	3	13	13	13	3	3	7	6	11	11	1	1	6	6	1	1	7	7	4	4	5	4	3	3	6	5	3	3	7	6	11	11	1	1	6	6	1	1	7	7	4	4
A0A140VJQ2;A0A0S2Z4G7;A4ZU86;A0A0S2Z491;P06748;E5RGW4;E5RI98;V9HVU7;A0A024RAP1;Q9BTI9;Q9NX34	A0A140VJQ2;A0A0S2Z4G7;A4ZU86;A0A0S2Z491;P06748;E5RGW4;E5RI98;V9HVU7;A0A024RAP1;Q9BTI9	4;4;4;4;4;2;2;2;2;2;1	4;4;4;4;4;2;2;2;2;2;1	4;4;4;4;4;2;2;2;2;2;1	Nucleophosmin	NPM1;CLEC2D	>tr|A0A140VJQ2|A0A140VJQ2_HUMAN Testicular tissue protein Li 128 OS=Homo sapiens PE=2 SV=1;>tr|A0A0S2Z4G7|A0A0S2Z4G7_HUMAN Nucleophosmin (Nucleolar phosphoprotein B23, numatrin), isoform CRA_f (Fragment) OS=Homo sapiens GN=NPM1 PE=2 SV=1;>tr|A4ZU86|A4ZU86_	11	4	4	4	0	0	0	0	1	1	0	0	0	0	0	0	4	4	0	0	0	0	0	0	0	0	0	0	0	0	1	1	0	0	0	0	0	0	4	4	0	0
B7Z6I5;Q5QNY5;A0A0S2Z497;H0YJ60;P40855;H0YDY4;G3V3G9;B7Z2P6	B7Z6I5;Q5QNY5;A0A0S2Z497;H0YJ60;P40855;H0YDY4;G3V3G9;B7Z2P6	2;2;2;2;2;1;1;1	2;2;2;2;2;1;1;1	2;2;2;2;2;1;1;1	Peroxisomal biogenesis factor 19	PEX19;DCAF8	>tr|B7Z6I5|B7Z6I5_HUMAN Peroxisomal biogenesis factor 19, isoform CRA_a OS=Homo sapiens GN=PEX19 PE=2 SV=1;>tr|Q5QNY5|Q5QNY5_HUMAN Peroxisomal biogenesis factor 19 (Fragment) OS=Homo sapiens GN=PEX19 PE=1 SV=1;>tr|A0A0S2Z497|A0A0S2Z497_HUMAN Peroxisomal bi	8	2	2	2	0	0	0	0	0	1	2	2	0	0	0	0	0	0	0	0	0	0	0	0	0	0	0	0	0	0	0	1	2	2	0	0	0	0	0	0	0	0
A0A0S2Z4B5;A0A0S2Z4C6;Q08209;E7ETC2;E9PPC8;E9PK68;Q9UMM5;B7Z781;Q5F2F8;P16298;P48454;Q9UMB2;B7Z6P2;Q5F2G0;H0YB04;H0YC26;G3V111	A0A0S2Z4B5;A0A0S2Z4C6;Q08209;E7ETC2	18;17;17;10;7;7;6;5;5;5;2;1;1;1;1;1;1	18;17;17;10;7;7;6;5;5;5;2;1;1;1;1;1;1	18;17;17;10;7;7;6;5;5;5;2;1;1;1;1;1;1	Serine/threonine-protein phosphatase 2B catalytic subunit alpha isoform;Serine/threonine-protein phosphatase	PPP3CA	>tr|A0A0S2Z4B5|A0A0S2Z4B5_HUMAN Serine/threonine-protein phosphatase (Fragment) OS=Homo sapiens GN=PPP3CA PE=2 SV=1;>tr|A0A0S2Z4C6|A0A0S2Z4C6_HUMAN Serine/threonine-protein phosphatase (Fragment) OS=Homo sapiens GN=PPP3CA PE=2 SV=1;>sp|Q08209|PP2BA_HUMAN S	17	18	18	18	5	4	9	8	8	8	4	5	6	7	5	5	8	9	4	5	8	9	10	10	6	6	5	4	9	8	8	8	4	5	6	7	5	5	8	9	4	5
A0A0S2Z4C3;P07954;A0A0S2Z3X6;A0A0S2Z3S9;A0A0S2Z408;A0A0S2Z3W2;A0A0S2Z4H0	A0A0S2Z4C3;P07954	10;10;2;1;1;1;1	10;10;2;1;1;1;1	10;10;2;1;1;1;1	Fumarate hydratase, mitochondrial	FH	>tr|A0A0S2Z4C3|A0A0S2Z4C3_HUMAN Fumarate hydratase isoform 1 (Fragment) OS=Homo sapiens GN=FH PE=2 SV=1;>sp|P07954|FUMH_HUMAN Fumarate hydratase, mitochondrial OS=Homo sapiens GN=FH PE=1 SV=3	7	10	10	10	0	0	1	1	4	3	1	0	2	2	1	1	2	3	0	0	0	0	0	0	0	0	0	0	1	1	4	3	1	0	2	2	1	1	2	3	0	0
K7EQN8;Q59FA7;K7EP59;Q9HBS3;A0A0S2Z4D1;Q15831;K7EMR0;A0A0S2Z4C7;A6YR18	K7EQN8;Q59FA7;K7EP59;Q9HBS3;A0A0S2Z4D1;Q15831;K7EMR0;A0A0S2Z4C7;A6YR18	2;2;2;2;2;2;1;1;1	2;2;2;2;2;2;1;1;1	2;2;2;2;2;2;1;1;1	Serine/threonine-protein kinase STK11	STK11	>tr|K7EQN8|K7EQN8_HUMAN Serine/threonine-protein kinase STK11 (Fragment) OS=Homo sapiens GN=STK11 PE=1 SV=1;>tr|Q59FA7|Q59FA7_HUMAN Serine/threonine protein kinase 11 variant (Fragment) OS=Homo sapiens PE=2 SV=1;>tr|K7EP59|K7EP59_HUMAN Serine/threonine-pro	9	2	2	2	0	0	0	0	1	1	1	1	1	1	1	0	0	1	1	1	0	0	0	0	0	0	0	0	0	0	1	1	1	1	1	1	1	0	0	1	1	1
A0A0S2Z4E4;B2R6S4;A0A0S2Z4Y3;P16333;C9K098;C9JVV5;H7C5C7;C9J869;A0A0S2Z4D7;C9J0K5;C9JAB9;Q53T91;E7ERP6;E9PEE2;E7EPF5;A0A0S2Z4M6;O43639	A0A0S2Z4E4;B2R6S4;A0A0S2Z4Y3;P16333;C9K098;C9JVV5;H7C5C7;C9J869;A0A0S2Z4D7;C9J0K5;C9JAB9	4;4;4;4;3;3;3;3;3;2;2;1;1;1;1;1;1	4;4;4;4;3;3;3;3;3;2;2;1;1;1;1;1;1	4;4;4;4;3;3;3;3;3;2;2;1;1;1;1;1;1	Cytoplasmic protein NCK1	NCK1	>tr|A0A0S2Z4E4|A0A0S2Z4E4_HUMAN NCK adaptor protein 1 isoform 3 (Fragment) OS=Homo sapiens GN=NCK1 PE=2 SV=1;>tr|B2R6S4|B2R6S4_HUMAN cDNA, FLJ93089, highly similar to Homo sapiens NCK adaptor protein 1 (NCK1), mRNA OS=Homo sapiens PE=2 SV=1;>tr|A0A0S2Z4Y3|	17	4	4	4	0	0	0	0	0	0	2	2	0	0	0	0	0	1	0	0	0	0	1	1	0	0	0	0	0	0	0	0	2	2	0	0	0	0	0	1	0	0
Q53TA7;Q59G97;A8KAJ3;A0A0S2Z4F1;Q12805;A0A0U1RQV3;B4DWH0;B3KS53;A0A0S2Z3V1;B2R6M6	Q53TA7;Q59G97;A8KAJ3;A0A0S2Z4F1;Q12805;A0A0U1RQV3;B4DWH0;B3KS53;A0A0S2Z3V1;B2R6M6	10;10;10;10;10;9;9;9;9;9	10;10;10;10;10;9;9;9;9;9	10;10;10;10;10;9;9;9;9;9	EGF-containing fibulin-like extracellular matrix protein 1	EFEMP1	>tr|Q53TA7|Q53TA7_HUMAN Putative uncharacterized protein EFEMP1 (Fragment) OS=Homo sapiens GN=EFEMP1 PE=4 SV=1;>tr|Q59G97|Q59G97_HUMAN EGF-containing fibulin-like extracellular matrix protein 1 isoform b variant (Fragment) OS=Homo sapiens PE=4 SV=1;>tr|A8K	10	10	10	10	0	0	0	0	8	7	3	3	0	1	0	0	3	3	0	0	2	2	1	1	2	2	0	0	0	0	8	7	3	3	0	1	0	0	3	3	0	0
Q5HYB6;B2RDE1;A0A0S2Z4G4;A0A087WWU8;Q5VU61;J3KN67;Q8NAG3;B4DWT5;M1VPF4;B4DQ80;D6R904;K7EP68;Q6LDX7;H0YL80;Q8NI98;H0YKX5;Q8TCG4;H0YNC7;Q15657;D6RFM2;A0A024R4K5;B4DTK3	Q5HYB6;B2RDE1;A0A0S2Z4G4;A0A087WWU8;Q5VU61;J3KN67;Q8NAG3;B4DWT5;M1VPF4;B4DQ80	15;15;15;14;12;12;11;11;11;9;6;6;4;3;3;3;3;3;3;2;2;2	8;8;8;8;7;5;7;7;4;5;3;0;3;0;2;0;0;0;0;2;2;0	3;3;3;3;3;3;3;3;3;3;0;0;3;0;1;0;0;0;0;0;1;0	Tyrosine-protein kinase receptor	DKFZp686J1372;TPM3;TPM3-ROS1	>tr|Q5HYB6|Q5HYB6_HUMAN Epididymis luminal protein 189 OS=Homo sapiens GN=DKFZp686J1372 PE=1 SV=1;>tr|B2RDE1|B2RDE1_HUMAN cDNA, FLJ96568, highly similar to Homo sapiens tropomyosin 3 (TPM3), mRNA OS=Homo sapiens PE=2 SV=1;>tr|A0A0S2Z4G4|A0A0S2Z4G4_HUMAN Tr	22	15	8	3	2	1	7	5	4	5	3	4	5	6	3	5	7	5	9	9	5	4	7	5	2	2	1	0	3	1	1	2	2	3	2	3	1	2	4	3	5	5
E7ER27;E7EWE5;B4DSD0;B4DDM5;B2R659;A0A0S2Z4J1;P51659;G5E9S2;B3KSP2;E7ET17;B4DI68;Q59H27;E7EPL9	E7ER27;E7EWE5;B4DSD0;B4DDM5;B2R659;A0A0S2Z4J1;P51659;G5E9S2;B3KSP2;E7ET17;B4DI68	3;3;3;3;3;3;3;2;2;2;2;1;1	3;3;3;3;3;3;3;2;2;2;2;1;1	3;3;3;3;3;3;3;2;2;2;2;1;1	Peroxisomal multifunctional enzyme type 2;(3R)-hydroxyacyl-CoA dehydrogenase;Enoyl-CoA hydratase 2	HSD17B4	>tr|E7ER27|E7ER27_HUMAN Peroxisomal multifunctional enzyme type 2 OS=Homo sapiens GN=HSD17B4 PE=1 SV=3;>tr|E7EWE5|E7EWE5_HUMAN Peroxisomal multifunctional enzyme type 2 OS=Homo sapiens GN=HSD17B4 PE=1 SV=1;>tr|B4DSD0|B4DSD0_HUMAN cDNA FLJ59409, highly simi	13	3	3	3	0	0	1	1	0	0	0	0	0	0	0	0	2	1	0	0	1	1	0	0	0	0	0	0	1	1	0	0	0	0	0	0	0	0	2	1	0	0
A0A0S2Z4J6;O15305;B2R6D4;H3BV55;H3BPH4;H3BRM0;B7Z3M6;B7Z6A1;H3BR08;H3BM92;H3BV34;H3BT06;H3BNY9;Q59F02;B7Z922;B7Z419;A0A024R1U5;Q92871	A0A0S2Z4J6;O15305;B2R6D4;H3BV55;H3BPH4;H3BRM0;B7Z3M6;B7Z6A1	8;8;7;6;5;5;4;4;3;3;3;3;3;3;2;2;1;1	8;8;7;6;5;5;4;4;3;3;3;3;3;3;2;2;1;1	8;8;7;6;5;5;4;4;3;3;3;3;3;3;2;2;1;1	Phosphomannomutase 2;Phosphomannomutase	PMM2	>tr|A0A0S2Z4J6|A0A0S2Z4J6_HUMAN Phosphomannomutase (Fragment) OS=Homo sapiens GN=PMM2 PE=2 SV=1;>sp|O15305|PMM2_HUMAN Phosphomannomutase 2 OS=Homo sapiens GN=PMM2 PE=1 SV=1;>tr|B2R6D4|B2R6D4_HUMAN Phosphomannomutase OS=Homo sapiens PE=2 SV=1;>tr|H3BV55|H3B	18	8	8	8	1	1	2	2	4	4	2	2	1	1	0	0	3	3	2	2	3	3	3	3	4	4	1	1	2	2	4	4	2	2	1	1	0	0	3	3	2	2
G5E9F8;Q9NSD0;Q16519;A0A0S2Z4K3;A0A0S2Z4L3;P07225;B4E1L6;Q8IXD4;Q8IXD1;Q8IXC3;H7BXT0;Q8J011;Q8J010;C9K0R0;Q16441;CON__P07224	G5E9F8;Q9NSD0;Q16519;A0A0S2Z4K3;A0A0S2Z4L3;P07225;B4E1L6	7;7;7;7;7;7;4;2;2;2;2;1;1;1;1;1	7;7;7;7;7;7;4;2;2;2;2;1;1;1;1;1	7;7;7;7;7;7;4;2;2;2;2;1;1;1;1;1	Vitamin K-dependent protein S	PROS1	>tr|G5E9F8|G5E9F8_HUMAN Protein S (Alpha), isoform CRA_b OS=Homo sapiens GN=PROS1 PE=1 SV=1;>tr|Q9NSD0|Q9NSD0_HUMAN Protein S OS=Homo sapiens PE=2 SV=1;>tr|Q16519|Q16519_HUMAN Protein S (Fragment) OS=Homo sapiens GN=PROS1 PE=4 SV=1;>tr|A0A0S2Z4K3|A0A0S2Z4K	16	7	7	7	0	0	1	1	2	2	2	2	1	0	0	0	1	1	0	0	2	2	1	1	1	2	0	0	1	1	2	2	2	2	1	0	0	0	1	1	0	0
[truncated: 2,405 more rows]
[truncated: 195 more columns]

## Sheet: SIG+ BH FDR005
Z-score LFQ NSP_10	Z-score LFQ NSP_10_r	Z-score LFQ NSP_12	Z-score LFQ NSP_12_r	Z-score LFQ NSP_14	Z-score LFQ NSP_14_r	Z-score LFQ NSP_16	Z-score LFQ NSP_16_r	Z-score LFQ NSP_20	Z-score LFQ NSP_20_r	Z-score LFQ A10	Z-score LFQ A10_r	Z-score LFQ A2	Z-score LFQ A2_r	Z-score LFQ A4	Z-score LFQ A4_r	Z-score LFQ OAT_11	Z-score LFQ OAT_11_r	Z-score LFQ OAT_16	Z-score LFQ OAT_16_r	Z-score LFQ OAT_9	Z-score LFQ OAT_9_r	t-test Significant__(Benjamini H. FDR 0.05)	=-Log t-test p-value__(Benjamini H. FDR 0.05)	t-test Difference__(Benjamini H. FDR 0.05)	Protein IDs	Majority protein IDs	Protein names	Gene names
[truncated: 74 more rows]

[truncated: 1 more sheets: Sig+ Volcano FDR005]
